# Supplementary material for: Messenger RNA Sequencing and Pathway Analysis Provide Novel Insights Into the Susceptibility to Salmonella enteritidis Infection in Chickens
Source: Front Genet. 2018 Jul 13;9:256. doi: 10.3389/fgene.2018.00256 (PMC6055056; doi:10.3389/fgene.2018.00256)
Supplement: Supplementary file 1 [file Table_1.xlsx]

## Sheet: Table S1
Sample	Raw Data		Valid Data		Valid Ratio(reads)	Q20%	Q30%	GC content%
	Read	Base	Read	Base					Mapped reads	Unique Mapped reads	Multi Mapped reads	PE Mapped reads	Mapped left reads	Mapped right reads	Reads map to sense strand	Reads map to antisense strand	Non-splice reads	Splice reads
C1p_C	76316126	11.45G	70367368	10.56G	92.21	98.34	90.71	50	48844860(69.81%)	43887774(62.73%)	4957086(7.08%)	21428027(30.63%)	24339448(34.79%)	24505412(35.02%)	22028159(31.48%)	21859615(31.24%)	36024405(51.49%)	7863369(11.24%)
C2p_C	115532268	17.33G	107403020	16.11G	92.96	98.58	89.84	56	73493408(69.07%)	60192568(56.57%)	13300840(12.50%)	33028114(31.04%)	36748256(34.54%)	36745152(34.54%)	30316623(28.49%)	29875945(28.08%)	52513053(49.36%)	7679515(7.22%)
C3p_C	198847790	29.83G	186288912	27.94G	93.68	98.82	89.84	51.5	137586949(74.13%)	119200475(64.23%)	18386474(9.91%)	61991817(33.40%)	68396609(36.85%)	69190340(37.28%)	59738851(32.19%)	59461624(32.04%)	100858831(54.34%)	18341644(9.88%)
S1p_S	84796132	12.72G	76182876	11.43G	89.84	98.46	92.64	43.5	57152448(75.23%)	55588623(73.17%)	1563825(2.06%)	24900888(32.78%)	28692781(37.77%)	28459667(37.46%)	27815299(36.61%)	27773324(36.56%)	51135713(67.31%)	4452910(5.86%)
S2p_S	85955724	12.89G	80411580	12.06G	93.55	98.41	90.01	53	52499541(65.29%)	45714782(56.85%)	6784759(8.44%)	22092621(27.47%)	26544421(33.01%)	25955120(32.28%)	22741175(28.28%)	22973607(28.57%)	38047748(47.31%)	7667034(9.53%)
S3p_S	95157630	14.27G	87170274	13.08G	91.61	98.27	91.02	53	58505790(67.28%)	50521710(58.10%)	7984080(9.18%)	26036834(29.94%)	29057388(33.42%)	29448402(33.87%)	25305059(29.10%)	25216651(29.00%)	42141087(48.46%)	8380623(9.64%)
R1p_R	99702256	14.96G	92027842	13.80G	92.3	98.84	90.82	51.5	68283133(74.37%)	59290068(64.57%)	8993065(9.79%)	31232225(34.01%)	34007961(37.04%)	34275172(37.33%)	29689783(32.33%)	29600285(32.24%)	50722507(55.24%)	8567561(9.33%)
R2p_R	89737662	13.46G	83692520	12.55G	93.26	98.41	88.57	49.5	60899734(72.86%)	55880766(66.86%)	5018968(6.00%)	27001376(32.30%)	30630066(36.65%)	30269668(36.21%)	28012974(33.51%)	27867792(33.34%)	49298187(58.98%)	6582579(7.88%)
R3p_R	114624270	17.19G	105141074	15.77G	91.73	98.53	89.17	49.5	78228098(74.60%)	70390934(67.13%)	7837164(7.47%)	35002398(33.38%)	39275941(37.46%)	38952157(37.15%)	35320534(33.68%)	35070400(33.45%)	59775720(57.01%)	10615214(10.12%)

## Sheet: Table S2 
transcript_id	chr	start	end	strand	gene_id	gene_name	annotation	S1p_S_fpkm	S2p_S_fpkm	S3p_S_fpkm	C1p_C_fpkm	C2p_C_fpkm	C3p_C_fpkm	mean_fpkm_S	mean_fpkm_C	regulation	Fold change	log2fold_change	pvalue	FDR	significant	go	kegg
ENSGALT00000006099	chr27	4516078	4520185	-1	ENSGALG00000019716	KRT20	Gallus gallus keratin 20 (KRT20), mRNA. [Source:RefSeq mRNA;Acc:NM_001277981]	18.7827	13.0486	12.126	0.01	0.496486	0.466479	14.6525	0.320988	up	45.648	5.51248	0.0199528	0.0527902	yes	GO:0033554(cellular response to stress),GO:0045109(intermediate filament organization),GO:0050708(regulation of protein secretion),GO:0005737(cytoplasm),GO:0005882(intermediate filament),GO:0005198(structural molecule activity),GO:0005515(protein binding)	NA
ENSGALT00000034033	chr8	3600074	3604434	-1	ENSGALG00000002549	RGS1	regulator of G-protein signaling 1 [Source:HGNC Symbol;Acc:9991]	22.5798	40.2385	48.6833	0.613282	3.20161	4.30095	37.1672	2.70528	up	13.7387	3.78018	0.0439118	0.050135	yes	GO:0038032(termination of G-protein coupled receptor signaling pathway)	NA
ENSGALT00000025580	chr2	122812317	122830102	1	ENSGALG00000015868	ATP6V0D2	Gallus gallus ATPase, H+ transporting, lysosomal 38kDa, V0 subunit d2 (ATP6V0D2), mRNA. [Source:RefSeq mRNA;Acc:NM_001008455]	19.3641	37.3649	41.6513	3.02416	3.94688	0.757447	32.7934	2.57616	up	12.7296	3.67011	0.0450898	0.0500455	yes	GO:0006810(transport),GO:0006811(ion transport),GO:0015991(ATP hydrolysis coupled proton transport),GO:0015992(proton transport),GO:0016020(membrane),GO:0016324(apical plasma membrane),GO:0016471(vacuolar proton-transporting V-type ATPase complex),GO:0033179(proton-transporting V-type ATPase, V0 domain),GO:0005769(early endosome),GO:0015078(hydrogen ion transmembrane transporter activity),GO:0005…	00190(Oxidative phosphorylation),04145(Phagosome),04142(Lysosome),04966(Collecting duct acid secretion),04721(Synaptic vesicle cycle),05203(Viral carcinogenesis),05323(Rheumatoid arthritis),05110(Vibrio cholerae infection),05120(Epithelial cell signaling in Helicobacter pylori infection),05152(Tuberculosis)
ENSGALT00000018521	chr5	49388166	49393962	-1	ENSGALG00000011351	HSP90AA1	heat shock protein 90kDa alpha (cytosolic), class A member 1 [Source:HGNC Symbol;Acc:5253]	46.8731	22.8181	66.8853	563.759	273.012	582.648	45.5255	473.14	down	10.3929	-3.37752	0.048731	0.0498433	yes	GO:0006457(protein folding),GO:0006950(response to stress),GO:0045040(protein import into mitochondrial outer membrane),GO:0051131(chaperone-mediated protein complex assembly),GO:0006200(ATP catabolic process),GO:0045429(positive regulation of nitric oxide biosynthetic process),GO:0005737(cytoplasm),GO:0005622(intracellular),GO:0005524(ATP binding),GO:0051082(unfolded protein binding),GO:0030235(…	NA
ENSGALT00000027918	chr1	192042796	192043578	1	ENSGALG00000017268	KCTD21	potassium channel tetramerization domain containing 21 [Source:HGNC Symbol;Acc:27452]	0.01	1.38553	0.814359	7.31709	6.14066	6.85555	0.733297	6.7711	down	9.23378	-3.20692	0.000382908	0.054909	yes	GO:0051260(protein homooligomerization),GO:0005515(protein binding)	NA
ENSGALT00000003106	chr23	3699920	3703222	-1	ENSGALG00000001996	DNALI1	dynein, axonemal, light intermediate chain 1 [Source:HGNC Symbol;Acc:14353]	0.01	0.934428	0.27461	4.66062	3.83686	2.12865	0.403013	3.54204	down	8.78892	-3.13569	0.0390403	0.0497192	yes	GO:0005737(cytoplasm),GO:0005515(protein binding)	05016(Huntington's disease)
ENSGALT00000014112	chr7	12909913	12913364	-1	ENSGALG00000008666	CTLA4	Gallus gallus cytotoxic T-lymphocyte-associated protein 4 (CTLA4), mRNA. [Source:RefSeq mRNA;Acc:NM_001040091]	24.7176	13.2901	18.8645	1.40372	3.11832	2.10949	18.9574	2.21051	up	8.57602	3.10031	0.0341926	0.050758	yes	GO:0006955(immune response),GO:0006974(cellular response to DNA damage stimulus),GO:0030889(negative regulation of B cell proliferation),GO:0043065(positive regulation of apoptotic process),GO:0045590(negative regulation of regulatory T cell differentiation),GO:0050853(B cell receptor signaling pathway),GO:0005794(Golgi apparatus),GO:0009897(external side of plasma membrane),GO:0016020(membrane),…	04514(Cell adhesion molecules (CAMs)),04660(T cell receptor signaling pathway),05323(Rheumatoid arthritis),05320(Autoimmune thyroid disease)
ENSGALT00000010010	chr14	6949246	6957640	-1	ENSGALG00000006202	SCNN1B	sodium channel, non-voltage-gated 1, beta subunit [Source:HGNC Symbol;Acc:10600]	1.19718	0.736389	0.799052	0.01	0.199364	0.124877	0.910873	0.10808	up	8.42774	3.07515	0.0193164	0.0532687	yes	GO:0006810(transport),GO:0006811(ion transport),GO:0006814(sodium ion transport),GO:0035725(sodium ion transmembrane transport),GO:0016020(membrane),GO:0016021(integral to membrane),GO:0009897(external side of plasma membrane),GO:0034706(sodium channel complex),GO:0005272(sodium channel activity),GO:0015280(ligand-gated sodium channel activity),GO:0050699(WW domain binding),GO:0005515(protein bin…	04960(Aldosterone-regulated sodium reabsorption),04742(Taste transduction)
ENSGALT00000045711	chr9	22180190	22186891	-1	ENSGALG00000028284	PTX3	pentraxin-related protein PTX3 precursor [Source:RefSeq peptide;Acc:NP_001017413]	4.20346	4.19088	4.88472	0.01	0.916661	0.735985	4.42635	0.550882	up	8.03503	3.0063	0.000528418	0.0378875	yes	GO:0050766(positive regulation of phagocytosis),GO:0045429(positive regulation of nitric oxide biosynthetic process),GO:0008228(opsonization),GO:0001878(response to yeast),GO:0001872((1->3)-beta-D-glucan binding)	NA
ENSGALT00000037300	chr5	56155603	56157659	-1	ENSGALG00000012173	LGALS3	lectin, galactoside-binding, soluble, 3 [Source:HGNC Symbol;Acc:6563]	34.9911	31.8055	41.4852	1.53394	5.96332	6.53138	36.0939	4.67621	up	7.71862	2.94834	0.00199465	0.038653	yes	GO:0001501(skeletal system development),GO:0030198(extracellular matrix organization),GO:0005743(mitochondrial inner membrane),GO:0031012(extracellular matrix),GO:0005737(cytoplasm),GO:0005634(nucleus),GO:0005578(proteinaceous extracellular matrix),GO:0030246(carbohydrate binding),GO:0005515(protein binding)	NA
ENSGALT00000007278	chr21	5566997	5568974	1	ENSGALG00000004572	CNP3	Gallus gallus natriuretic peptide C (NPPC), mRNA. [Source:RefSeq mRNA;Acc:NM_001111259]	0.01	2.13681	2.10553	10.8421	13.2716	7.92502	1.41411	10.6796	down	7.55212	-2.91688	0.0144478	0.0536739	yes	GO:0050880(regulation of blood vessel size),GO:0003418(growth plate cartilage chondrocyte differentiation),GO:0003419(growth plate cartilage chondrocyte proliferation),GO:0006182(cGMP biosynthetic process),GO:0007168(receptor guanylyl cyclase signaling pathway),GO:0005576(extracellular region),GO:0005179(hormone activity)	04270(Vascular smooth muscle contraction)
ENSGALT00000017687	chr5	44628421	44646454	-1	ENSGALG00000010881	ASB2	ankyrin repeat and SOCS box containing 2 [Source:HGNC Symbol;Acc:16012]	0.01	0.551256	1.78203	4.95985	6.89833	4.53698	0.777762	5.46506	down	7.02664	-2.81283	0.00825429	0.0493194	yes	GO:0000209(protein polyubiquitination),GO:0016567(protein ubiquitination),GO:0035556(intracellular signal transduction),GO:0035914(skeletal muscle cell differentiation),GO:0042787(protein ubiquitination involved in ubiquitin-dependent protein catabolic process),GO:0045445(myoblast differentiation),GO:0031466(Cul5-RING ubiquitin ligase complex),GO:0004842(ubiquitin-protein ligase activity),GO:0005…	NA
ENSGALT00000010084	chr5	11839355	11849927	-1	ENSGALG00000006236	TPH1	Gallus gallus tryptophan hydroxylase 1 (TPH1), mRNA. [Source:RefSeq mRNA;Acc:NM_204956]	0.01	1.14874	0.877739	6.60583	3.14457	4.22074	0.675493	4.65705	down	6.89429	-2.7854	0.0481598	0.0498277	yes	GO:0008152(metabolic process),GO:0009072(aromatic amino acid family metabolic process),GO:0042427(serotonin biosynthetic process),GO:0046849(bone remodeling),GO:0055114(oxidation-reduction process),GO:0060749(mammary gland alveolus development),GO:0004497(monooxygenase activity),GO:0004510(tryptophan 5-monooxygenase activity),GO:0005506(iron ion binding),GO:0016491(oxidoreductase activity),GO:001…	00380(Tryptophan metabolism),04726(Serotonergic synapse)
ENSGALT00000044983	chr10	2104514	2106613	-1	ENSGALG00000029151	ISLR2	Gallus gallus immunoglobulin superfamily containing leucine-rich repeat 2 (ISLR2), mRNA. [Source:RefSeq mRNA;Acc:NM_001044667]	0.01	0.574006	0.101213	1.61673	1.75086	1.2148	0.225073	1.52746	down	6.78652	-2.76267	0.00566847	0.046716	yes	GO:0005515(protein binding)	NA
ENSGALT00000015790	chr2	24033200	24043554	-1	ENSGALG00000009700	PDK4	Gallus gallus pyruvate dehydrogenase kinase, isozyme 4 (PDK4), nuclear gene encoding mitochondrial protein, mRNA. [Source:RefSeq mRNA;Acc:NM_001199909]	168.142	138.355	91.2921	30.1847	16.1472	13.5383	132.596	19.9568	up	6.64418	2.73209	0.0318144	0.0508038	yes	GO:2000811(negative regulation of anoikis),GO:0071398(cellular response to fatty acid),GO:0042304(regulation of fatty acid biosynthetic process),GO:0072593(reactive oxygen species metabolic process),GO:0010510(regulation of acetyl-CoA biosynthetic process from pyruvate),GO:0009267(cellular response to starvation),GO:0010906(regulation of glucose metabolic process),GO:0006468(protein phosphorylati…	NA
ENSGALT00000003276	chr12	1359539	1396127	-1	ENSGALG00000002099	PFKFB4	6-phosphofructo-2-kinase/fructose-2,6-biphosphatase 4 [Source:HGNC Symbol;Acc:8875]	155.754	123.233	105.087	30.6843	13.9837	13.7601	128.025	19.4761	up	6.57344	2.71665	0.0103777	0.0496054	yes	GO:0006000(fructose metabolic process),GO:0006003(fructose 2,6-bisphosphate metabolic process),GO:0008152(metabolic process),GO:0003824(catalytic activity),GO:0003873(6-phosphofructo-2-kinase activity),GO:0004331(fructose-2,6-bisphosphate 2-phosphatase activity),GO:0005524(ATP binding)	00051(Fructose and mannose metabolism),04066(HIF-1 signaling pathway)
ENSGALT00000018959	chr5	17831849	17958154	-1	ENSGALG00000011609	ABTB2	ankyrin repeat and BTB (POZ) domain containing 2 [Source:HGNC Symbol;Acc:23842]	0.01	1.30623	0.767747	3.24278	5.6582	4.17915	0.691324	4.36004	down	6.3068	-2.65691	0.0184141	0.0534531	yes	GO:0046982(protein heterodimerization activity),GO:0005515(protein binding)	NA
ENSGALT00000000975	chr26	2104478	2112977	1	ENSGALG00000000692	CDK18	cyclin-dependent kinase 18 [Source:HGNC Symbol;Acc:8751]	0.01	2.20399	0.523149	7.90883	4.27629	4.63452	0.909046	5.60655	down	6.16751	-2.62469	0.0351588	0.050722	yes	GO:0006468(protein phosphorylation),GO:0000166(nucleotide binding),GO:0004672(protein kinase activity),GO:0004674(protein serine/threonine kinase activity),GO:0005524(ATP binding),GO:0016772(transferase activity, transferring phosphorus-containing groups),GO:0004713(protein tyrosine kinase activity),GO:0005515(protein binding)	NA
ENSGALT00000008443	chr2	1722123	1826632	1	ENSGALG00000005259	VIPR1	Gallus gallus vasoactive intestinal peptide receptor 1 (VIPR1), mRNA. [Source:RefSeq mRNA;Acc:NM_001097523]	0.317853	1.27835	0.397781	4.50072	2.38193	5.13903	0.664663	4.00722	down	6.02896	-2.59191	0.0436467	0.050313	yes	GO:0007165(signal transduction),GO:0007166(cell surface receptor signaling pathway),GO:0007186(G-protein coupled receptor signaling pathway),GO:0005886(plasma membrane),GO:0016020(membrane),GO:0016021(integral to membrane),GO:0005737(cytoplasm),GO:0005634(nucleus),GO:0004871(signal transducer activity),GO:0004888(transmembrane signaling receptor activity),GO:0004930(G-protein coupled receptor act…	04080(Neuroactive ligand-receptor interaction)
ENSGALT00000037229	chr2	65106801	65167267	1	ENSGALG00000012802	F13A1	Gallus gallus coagulation factor XIII, A1 polypeptide (F13A1), mRNA. [Source:RefSeq mRNA;Acc:NM_204685]	49.7261	84.0795	106.068	22.8088	10.0972	7.95047	79.9577	13.6188	up	5.87113	2.55364	0.0471189	0.0500508	yes	GO:0018149(peptide cross-linking),GO:0003810(protein-glutamine gamma-glutamyltransferase activity),GO:0046872(metal ion binding),GO:0007596(blood coagulation)	04610(Complement and coagulation cascades)
ENSGALT00000044360	chr3	15008233	15108357	1	ENSGALG00000028234	SYNDIG1	synapse differentiation inducing 1 [Source:HGNC Symbol;Acc:15885]	11.4805	4.92569	9.63912	0.01	3.13237	1.3193	8.68176	1.48389	up	5.85067	2.5486	0.0483166	0.0498461	yes	GO:0009607(response to biotic stimulus),GO:0051965(positive regulation of synapse assembly),GO:0006886(intracellular protein transport),GO:0016021(integral to membrane),GO:0005887(integral to plasma membrane),GO:0031901(early endosome membrane),GO:0014069(postsynaptic density),GO:0042803(protein homodimerization activity),GO:0035254(glutamate receptor binding)	NA
ENSGALT00000027789	chr1	182430989	182465988	1	ENSGALG00000017195	PGR	Gallus gallus progesterone receptor (PGR), mRNA. [Source:RefSeq mRNA;Acc:NM_205262]	0.01	2.81519	2.10592	12.6146	6.70549	9.32808	1.64037	9.54939	down	5.82148	-2.54139	0.026781	0.0507989	yes	GO:0006351(transcription, DNA-templated),GO:0006355(regulation of transcription, DNA-dependent),GO:0010629(negative regulation of gene expression),GO:0043401(steroid hormone mediated signaling pathway),GO:0030879(mammary gland development),GO:0050678(regulation of epithelial cell proliferation),GO:0001542(ovulation from ovarian follicle),GO:0002070(epithelial cell maturation),GO:0050847(progester…	04114(Oocyte meiosis),04914(Progesterone-mediated oocyte maturation)
ENSGALT00000024426	chr1	82632011	82677284	1	ENSGALG00000019232	WDR52	WD repeat domain 52 [Source:HGNC Symbol;Acc:25631]	0.01	0.261114	0.542633	1.08347	1.4879	2.05584	0.267916	1.5424	down	5.75704	-2.52533	0.0268058	0.0507118	yes	GO:0005515(protein binding)	NA
ENSGALT00000010524	chr24	3069116	3075912	1	ENSGALG00000006512	HSPA8	Gallus gallus heat shock 70kDa protein 8 (HSPA8), mRNA. [Source:RefSeq mRNA;Acc:NM_205003]	91.9751	68.6162	70.3677	454.842	392.845	462.833	76.9863	436.84	down	5.67426	-2.50443	0.00166833	0.0412479	yes	GO:0045892(negative regulation of transcription, DNA-dependent),GO:0000902(cell morphogenesis),GO:0006457(protein folding),GO:0051726(regulation of cell cycle),GO:0051085(chaperone mediated protein folding requiring cofactor),GO:0000974(Prp19 complex),GO:0005634(nucleus),GO:0005730(nucleolus),GO:0009986(cell surface),GO:0030529(ribonucleoprotein complex),GO:0005622(intracellular),GO:0005829(cytos…	03040(Spliceosome),04141(Protein processing in endoplasmic reticulum),04010(MAPK signaling pathway),04144(Endocytosis),04612(Antigen processing and presentation),04915(Estrogen signaling pathway),05134(Legionellosis),05162(Measles),05164(Influenza A),05169(Epstein-Barr virus infection),05145(Toxoplasmosis)
ENSGALT00000001383	chr24	301428	304582	-1	ENSGALG00000021443	PANX3	pannexin 3 [Source:HGNC Symbol;Acc:20573]	0.01	0.460784	1.05624	2.27121	2.27044	4.06326	0.505674	2.8683	down	5.67223	-2.50392	0.0393222	0.0498127	yes	GO:0005886(plasma membrane),GO:0005921(gap junction),GO:0016020(membrane),GO:0016021(integral to membrane)	NA
ENSGALT00000005800	chr5	2946165	2947340	-1	ENSGALG00000003660	FANCF	Fanconi anemia, complementation group F [Source:HGNC Symbol;Acc:3587]	3.03285	2.97253	2.71107	0.01	0.240503	1.44619	2.90548	0.562231	up	5.16777	2.36954	0.0297173	0.0517167	yes	GO:0043240(Fanconi anaemia nuclear complex),GO:0005515(protein binding)	03460(Fanconi anemia pathway)
ENSGALT00000006595	chr20	5622925	5666183	1	ENSGALG00000004146	RIMS4	regulating synaptic membrane exocytosis 4 [Source:HGNC Symbol;Acc:16183]	0.01	0.593069	0.261436	1.04401	2.08732	1.24207	0.284835	1.4578	down	5.11805	-2.35559	0.0467839	0.0499911	yes	GO:0042391(regulation of membrane potential),GO:0097060(synaptic membrane),GO:0044325(ion channel binding),GO:0005515(protein binding)	NA
ENSGALT00000026078	chr1	108800900	108832149	1	ENSGALG00000016185	SLC37A1	solute carrier family 37 (glucose-6-phosphate transporter), member 1 [Source:HGNC Symbol;Acc:11024]	4.15022	2.03923	2.99644	0.01	0.177213	1.63172	3.06196	0.602978	up	5.07807	2.34428	0.0384665	0.0497842	yes	GO:0006810(transport),GO:0055085(transmembrane transport),GO:0016021(integral to membrane),GO:0005215(transporter activity)	NA
ENSGALT00000017983	chr8	27186950	27217638	1	ENSGALG00000011041	DNAJC6	Gallus gallus DnaJ (Hsp40) homolog, subfamily C, member 6 (DNAJC6), mRNA. [Source:RefSeq mRNA;Acc:NM_001177415]	0.01	0.451005	0.361476	1.22698	1.39492	1.30157	0.270827	1.30782	down	4.829	-2.27173	0.0103707	0.0502417	yes	GO:0016311(dephosphorylation),GO:0005515(protein binding),GO:0016791(phosphatase activity)	04144(Endocytosis)
ENSGALT00000012978	chr20	13811824	13824523	-1	ENSGALG00000007994	PARD6B	Gallus gallus par-6 partitioning defective 6 homolog beta (C. elegans) (PARD6B), mRNA. [Source:RefSeq mRNA;Acc:NM_001044641]	3.39885	2.41229	1.74008	0.01	0.60031	0.966904	2.51707	0.522405	up	4.81825	2.26851	0.0332793	0.0506608	yes	GO:0006461(protein complex assembly),GO:0005634(nucleus),GO:0005737(cytoplasm),GO:0005886(plasma membrane),GO:0005923(tight junction),GO:0005938(cell cortex),GO:0045177(apical part of cell),GO:0005515(protein binding)	04390(Hippo signaling pathway),04391(Hippo signaling pathway -fly),04144(Endocytosis),04530(Tight junction)
ENSGALT00000015887	chr4	28668012	28671567	1	ENSGALG00000009768	MNOC	nocturnin [Source:RefSeq peptide;Acc:NP_001009928]	13.3533	12.3267	19.6055	1.52659	4.57821	3.35927	15.0952	3.15469	up	4.78499	2.25852	0.0227503	0.0512954	yes	GO:0000290(deadenylation-dependent decapping of nuclear-transcribed mRNA),GO:0033962(cytoplasmic mRNA processing body assembly),GO:0000932(cytoplasmic mRNA processing body),GO:0005515(protein binding)	NA
ENSGALT00000023235	chr13	13614747	13621757	1	ENSGALG00000023920	PHYKPL	5-phosphohydroxy-L-lysine phospho-lyase [Source:HGNC Symbol;Acc:28249]	12.7756	11.2896	8.85616	2.81675	1.77291	2.31247	10.9738	2.30071	up	4.76973	2.25391	0.0124936	0.0514821	yes	GO:0008152(metabolic process),GO:0005739(mitochondrion),GO:0003824(catalytic activity),GO:0008483(transaminase activity),GO:0030170(pyridoxal phosphate binding)	NA
ENSGALT00000023658	chrZ	56954953	56986064	1	ENSGALG00000014681	PCSK1	proprotein convertase subtilisin/kexin type 1 [Source:HGNC Symbol;Acc:8743]	1.84008	2.19839	2.13008	0.651377	0.357498	0.297503	2.05618	0.435459	up	4.72188	2.23936	0.000472541	0.0484017	yes	GO:0006508(proteolysis),GO:0016486(peptide hormone processing),GO:0016485(protein processing),GO:0043043(peptide biosynthetic process),GO:0005615(extracellular space),GO:0004252(serine-type endopeptidase activity),GO:0008233(peptidase activity),GO:0008236(serine-type peptidase activity),GO:0016787(hydrolase activity),GO:0004175(endopeptidase activity)	NA
ENSGALT00000023342	chr1	76520460	76539139	-1	ENSGALG00000014456	ACRBP	acrosin binding protein [Source:HGNC Symbol;Acc:17195]	1.34936	1.02154	0.619181	0.01	0.29961	0.337802	0.996693	0.212471	up	4.69097	2.22989	0.0461339	0.0500423	yes	()	NA
ENSGALT00000037566	chrZ	70417889	70424546	1	ENSGALG00000023066	DNAJA1	Gallus gallus DnaJ (Hsp40) homolog, subfamily A, member 1 (DNAJA1), mRNA. [Source:RefSeq mRNA;Acc:NM_001012945]	27.6483	14.9508	17.9595	80.6014	107.761	89.6092	20.1862	92.6572	down	4.59012	-2.19853	0.0044686	0.0471175	yes	GO:0006457(protein folding),GO:0007283(spermatogenesis),GO:0009408(response to heat),GO:0030317(sperm motility),GO:0030521(androgen receptor signaling pathway),GO:0005524(ATP binding),GO:0031072(heat shock protein binding),GO:0046872(metal ion binding),GO:0050750(low-density lipoprotein particle receptor binding),GO:0051082(unfolded protein binding),GO:0005515(protein binding)	04141(Protein processing in endoplasmic reticulum)
ENSGALT00000026662	chr1	119875127	119904791	-1	ENSGALG00000016522	PPEF1	protein phosphatase, EF-hand calcium binding domain 1 [Source:HGNC Symbol;Acc:9243]	1.07004	0.54849	0.81835	0.01	0.296988	0.241833	0.812294	0.179607	up	4.52262	2.17716	0.0316887	0.0512885	yes	GO:0004721(phosphoprotein phosphatase activity),GO:0005509(calcium ion binding),GO:0016787(hydrolase activity),GO:0005515(protein binding)	04745(Phototransduction - fly)
ENSGALT00000031388	chr18	10625178	10632820	1	ENSGALG00000019761	CHAD	chondroadherin [Source:HGNC Symbol;Acc:1909]	0.01	1.29979	1.54453	5.27256	4.83983	2.71593	0.948107	4.2761	down	4.51015	-2.17317	0.0314458	0.0512424	yes	GO:0005515(protein binding)	04151(PI3K-Akt signaling pathway),04512(ECM-receptor interaction),04510(Focal adhesion)
ENSGALT00000017951	chr4	45144527	45157728	1	ENSGALG00000011017	KLHL8	kelch-like family member 8 [Source:HGNC Symbol;Acc:18644]	1.03603	1.51963	1.68552	6.04054	6.72861	5.74918	1.41373	6.17278	down	4.36632	-2.12642	0.000374211	0.0670773	yes	GO:0042787(protein ubiquitination involved in ubiquitin-dependent protein catabolic process),GO:0016567(protein ubiquitination),GO:0031463(Cul3-RING ubiquitin ligase complex),GO:0005515(protein binding)	NA
ENSGALT00000002898	chr14	14447489	14451837	-1	ENSGALG00000001866	GPR151	Gallus gallus G protein-coupled receptor 151 (GPR151), mRNA. [Source:RefSeq mRNA;Acc:NM_001128665]	1.06986	1.0757	1.00416	0.01	0.445404	0.27899	1.0499	0.241465	up	4.34807	2.12038	0.0221113	0.0519797	yes	GO:0007165(signal transduction),GO:0007186(G-protein coupled receptor signaling pathway),GO:0016021(integral to membrane),GO:0004871(signal transducer activity),GO:0004930(G-protein coupled receptor activity)	04080(Neuroactive ligand-receptor interaction)
ENSGALT00000023638	chrZ	57356431	57528682	1	ENSGALG00000014668	MCTP1	multiple C2 domains, transmembrane 1 [Source:HGNC Symbol;Acc:26183]	0.01	1.09521	1.93116	3.97641	5.7016	3.38019	1.00879	4.35273	down	4.31482	-2.1093	0.0217252	0.0522717	yes	GO:0016021(integral to membrane),GO:0005515(protein binding),GO:0005509(calcium ion binding)	NA
ENSGALT00000002210	chr13	7192751	7211125	1	ENSGALG00000001455	CCNJL	cyclin J-like [Source:HGNC Symbol;Acc:25876]	0.01	2.99972	1.73991	7.08708	6.66794	6.68259	1.57988	6.81254	down	4.31207	-2.10838	0.024198	0.0511798	yes	GO:0000079(regulation of cyclin-dependent protein serine/threonine kinase activity),GO:0007049(cell cycle),GO:0051301(cell division),GO:0051726(regulation of cell cycle),GO:0005634(nucleus),GO:0019901(protein kinase binding)	NA
ENSGALT00000039832	chr26	4693285	4699278	-1	ENSGALG00000023780	TREML2	Gallus gallus triggering receptor expressed on myeloid cells-like 2 (TREML2), transcript variant 2, mRNA. [Source:RefSeq mRNA;Acc:NM_001080868]	0.01	4.57938	5.33974	10.6618	16.6372	15.3711	3.30638	14.2233	down	4.30179	-2.10494	0.0116559	0.0500438	yes	GO:0005515(protein binding)	NA
ENSGALT00000037785	chrZ	53683686	53692915	1	ENSGALG00000015399	FUT10	Gallus gallus fucosyltransferase 10 (alpha (1,3) fucosyltransferase) (FUT10), mRNA. [Source:RefSeq mRNA;Acc:NM_204430]	0.01	1.5014	2.55284	6.7963	6.98272	3.64089	1.35142	5.80664	down	4.29671	-2.10323	0.0332629	0.0507436	yes	GO:0006486(protein glycosylation),GO:0036065(fucosylation),GO:0000139(Golgi membrane),GO:0005794(Golgi apparatus),GO:0016020(membrane),GO:0016021(integral to membrane),GO:0032580(Golgi cisterna membrane),GO:0008417(fucosyltransferase activity),GO:0016740(transferase activity),GO:0016757(transferase activity, transferring glycosyl groups),GO:0046920(alpha-(1->3)-fucosyltransferase activity)	NA
ENSGALT00000039093	chr9	21936183	21948704	-1	ENSGALG00000009654	MLF1	myeloid leukemia factor 1 [Source:HGNC Symbol;Acc:7125]	0.01	1.82002	2.09832	5.42195	5.25587	5.86413	1.30611	5.51398	down	4.22167	-2.07781	0.0178	0.0536244	yes	GO:0007050(cell cycle arrest),GO:0005737(cytoplasm),GO:0005634(nucleus),GO:0019904(protein domain specific binding),GO:0005515(protein binding)	05202(Transcriptional misregulation in cancers)
ENSGALT00000024840	chrZ	53681704	53692241	1	ENSGALG00000015399	FUT10	Gallus gallus fucosyltransferase 10 (alpha (1,3) fucosyltransferase) (FUT10), mRNA. [Source:RefSeq mRNA;Acc:NM_204430]	0.01	1.68027	3.41365	8.61642	8.05642	4.67054	1.69797	7.11446	down	4.18997	-2.06694	0.0285327	0.051273	yes	GO:0006486(protein glycosylation),GO:0036065(fucosylation),GO:0000139(Golgi membrane),GO:0005794(Golgi apparatus),GO:0016020(membrane),GO:0016021(integral to membrane),GO:0032580(Golgi cisterna membrane),GO:0008417(fucosyltransferase activity),GO:0016740(transferase activity),GO:0016757(transferase activity, transferring glycosyl groups),GO:0046920(alpha-(1->3)-fucosyltransferase activity)	NA
ENSGALT00000004146	chr19	5084355	5129148	1	ENSGALG00000002631	FAM211A	family with sequence similarity 211, member A [Source:HGNC Symbol;Acc:32403]	0.01	2.1505	0.399151	2.39094	4.64747	3.64297	0.849884	3.56046	down	4.18935	-2.06673	0.0432878	0.050881	yes	()	NA
ENSGALT00000003113	chr10	1071516	1078311	-1	ENSGALG00000002000	GRAMD2	GRAM domain containing 2 [Source:HGNC Symbol;Acc:27287]	0.01	2.36712	1.92641	7.21208	6.40857	4.29515	1.43118	5.97194	down	4.17274	-2.06099	0.0170674	0.0556241	yes	()	NA
ENSGALT00000037601	chr5	43845120	43847133	-1	ENSGALG00000028537	NDUFB1	Gallus gallus NADH dehydrogenase (ubiquinone) 1 beta subcomplex, 1, 7kDa (NDUFB1), nuclear gene encoding mitochondrial protein, transcript variant 2, mRNA. [Source:RefSeq mRNA;Acc:NM_001277786]	0.01	5.79019	3.24855	12.9727	14.2033	10.4438	3.01291	12.5399	down	4.16207	-2.0573	0.0127254	0.0515485	yes	GO:0005739(mitochondrion),GO:0005747(mitochondrial respiratory chain complex I),GO:0003954(NADH dehydrogenase activity)	00190(Oxidative phosphorylation),05010(Alzheimer's disease),05012(Parkinson's disease),05016(Huntington's disease),04932(Non-alcoholic fatty liver disease (NAFLD))
ENSGALT00000026534	chr3	96480139	96496443	1	ENSGALG00000016446	ATP6V1C2	ATPase, H+ transporting, lysosomal 42kDa, V1 subunit C2 [Source:HGNC Symbol;Acc:18264]	7.13168	5.90521	8.75975	1.65004	0.989691	2.60365	7.26554	1.74779	up	4.15698	2.05554	0.00875828	0.0490601	yes	GO:0015991(ATP hydrolysis coupled proton transport),GO:0033180(proton-transporting V-type ATPase, V1 domain),GO:0005765(lysosomal membrane),GO:0015078(hydrogen ion transmembrane transporter activity),GO:0008553(hydrogen-exporting ATPase activity, phosphorylative mechanism)	00190(Oxidative phosphorylation),04145(Phagosome),04966(Collecting duct acid secretion),04721(Synaptic vesicle cycle),05323(Rheumatoid arthritis),05110(Vibrio cholerae infection),05120(Epithelial cell signaling in Helicobacter pylori infection)
ENSGALT00000014702	chr3	8094160	8384451	1	ENSGALG00000009034	ALK	anaplastic lymphoma receptor tyrosine kinase [Source:HGNC Symbol;Acc:427]	0.01	0.141083	0.273645	0.546384	0.695162	0.447872	0.138243	0.563139	down	4.07355	-2.02629	0.0167143	0.0565292	yes	GO:0000187(activation of MAPK activity),GO:0006468(protein phosphorylation),GO:0007165(signal transduction),GO:0007169(transmembrane receptor protein tyrosine kinase signaling pathway),GO:0016310(phosphorylation),GO:0018108(peptidyl-tyrosine phosphorylation),GO:0048666(neuron development),GO:0016020(membrane),GO:0016021(integral to membrane),GO:0000166(nucleotide binding),GO:0004672(protein kinas…	05223(Non-small cell lung cancer)
ENSGALT00000037264	chr2	62321056	62589197	-1	ENSGALG00000012732	PHACTR1	Gallus gallus phosphatase and actin regulator 1 (PHACTR1), mRNA. [Source:RefSeq mRNA;Acc:NM_204446]	0.989838	0.292718	0.464529	2.57644	2.74727	1.75524	0.582362	2.35965	down	4.05186	-2.01859	0.01177	0.0502325	yes	(),GO:0031032(actomyosin structure organization),GO:0031532(actin cytoskeleton reorganization),GO:0043149(stress fiber assembly),GO:0005634(nucleus),GO:0005829(cytosol),GO:0003779(actin binding)	NA
ENSGALT00000007670	chr20	6994464	7004637	1	ENSGALG00000004804	TGM3	transglutaminase 3 [Source:HGNC Symbol;Acc:11779]	1.95499	2.94849	6.47328	18.9297	13.8364	12.7962	3.79225	15.1874	down	4.00485	-2.00175	0.0103716	0.049909	yes	GO:0018149(peptide cross-linking),GO:0043163(cell envelope organization),GO:0006184(GTP catabolic process),GO:0051262(protein tetramerization),GO:0030216(keratinocyte differentiation),GO:0031234(extrinsic to cytoplasmic side of plasma membrane),GO:0005737(cytoplasm),GO:0003810(protein-glutamine gamma-glutamyltransferase activity),GO:0046872(metal ion binding),GO:0019003(GDP binding),GO:0003924(GT…	NA
ENSGALT00000034276	chr14	1990041	2011428	-1	ENSGALG00000003642	PDGF-A	platelet-derived growth factor subunit A preproprotein [Source:RefSeq peptide;Acc:NP_989637]	5.94349	4.98527	6.64916	0.01	2.24946	2.14168	5.85931	1.46371	up	4.00304	2.0011	0.0107827	0.0495589	yes	GO:0051781(positive regulation of cell division),GO:0008284(positive regulation of cell proliferation),GO:0009611(response to wounding),GO:0010512(negative regulation of phosphatidylinositol biosynthetic process),GO:0010544(negative regulation of platelet activation),GO:0014068(positive regulation of phosphatidylinositol 3-kinase signaling),GO:0014910(regulation of smooth muscle cell migration),G…	04014(Ras signaling pathway),04010(MAPK signaling pathway),04151(PI3K-Akt signaling pathway),04060(Cytokine-cytokine receptor interaction),04810(Regulation of actin cytoskeleton),04510(Focal adhesion),04540(Gap junction),05200(Pathways in cancer),05202(Transcriptional misregulation in cancers),05206(MicroRNAs in cancer),05214(Glioma),05218(Melanoma),05215(Prostate cancer),05166(HTLV-I infection)
ENSGALT00000019271	chr2	43370426	43371574	-1	ENSGALG00000011808	CCR9	Gallus gallus chemokine (C-C motif) receptor 9 (CCR9), mRNA. [Source:RefSeq mRNA;Acc:NM_001045840]	1.77378	1.0491	1.75736	0.01	0.615386	0.555065	1.52675	0.390151	up	3.91322	1.96836	0.0226571	0.0514086	yes	GO:0006935(chemotaxis),GO:0007165(signal transduction),GO:0007186(G-protein coupled receptor signaling pathway),GO:0070098(chemokine-mediated signaling pathway),GO:0016020(membrane),GO:0016021(integral to membrane),GO:0004871(signal transducer activity),GO:0004930(G-protein coupled receptor activity),GO:0004950(chemokine receptor activity),GO:0005044(scavenger receptor activity),GO:0019956(chemok…	04060(Cytokine-cytokine receptor interaction),04672(Intestinal immune network for IgA production),04062(Chemokine signaling pathway)
ENSGALT00000032201	chr4	43211798	43236772	-1	ENSGALG00000010769	HPGD	Gallus gallus hydroxyprostaglandin dehydrogenase 15-(NAD) (HPGD), mRNA. [Source:RefSeq mRNA;Acc:NM_001277784]	107.267	91.3878	159.011	35.3659	23.0377	33.5002	119.222	30.6346	up	3.89174	1.96042	0.0450169	0.0501977	yes	GO:0006693(prostaglandin metabolic process),GO:0007179(transforming growth factor beta receptor signaling pathway),GO:0007565(female pregnancy),GO:0007567(parturition),GO:0008152(metabolic process),GO:0045786(negative regulation of cell cycle),GO:0055114(oxidation-reduction process),GO:0097070(ductus arteriosus closure),GO:0044237(cellular metabolic process),GO:0006694(steroid biosynthetic proces…	05202(Transcriptional misregulation in cancers)
ENSGALT00000008506	chr2	2072000	2073926	1	ENSGALG00000005305	ACKR2	atypical chemokine receptor 2 [Source:HGNC Symbol;Acc:1565]	5.33528	3.89182	6.39869	0.01	1.35739	2.68984	5.2086	1.34908	up	3.86086	1.94892	0.0223353	0.0516594	yes	GO:0006935(chemotaxis),GO:0007165(signal transduction),GO:0007186(G-protein coupled receptor signaling pathway),GO:0070098(chemokine-mediated signaling pathway),GO:0016020(membrane),GO:0016021(integral to membrane),GO:0005884(actin filament),GO:0005886(plasma membrane),GO:0004871(signal transducer activity),GO:0004930(G-protein coupled receptor activity),GO:0004950(chemokine receptor activity),GO…	NA
ENSGALT00000012646	chr12	16445398	16483848	-1	ENSGALG00000007798	SHQ1	SHQ1, H/ACA ribonucleoprotein assembly factor [Source:HGNC Symbol;Acc:25543]	0.01	0.982093	1.35525	4.059	1.95367	2.99343	0.779113	3.00203	down	3.85314	-1.94604	0.04584	0.0499503	yes	GO:2000233(negative regulation of rRNA processing),GO:0022618(ribonucleoprotein complex assembly),GO:0043065(positive regulation of apoptotic process),GO:0005654(nucleoplasm),GO:0005737(cytoplasm),GO:0005634(nucleus),GO:0005515(protein binding)	NA
ENSGALT00000014982	chr14	14266619	14277925	1	ENSGALG00000009201	CCNF	cyclin F [Source:HGNC Symbol;Acc:1591]	2.81982	4.31054	2.75977	13.9115	15.171	8.98236	3.29671	12.6883	down	3.84878	-1.9444	0.0310523	0.0511827	yes	GO:0010826(negative regulation of centrosome duplication),GO:0031146(SCF-dependent proteasomal ubiquitin-dependent protein catabolic process),GO:0016567(protein ubiquitination),GO:0001890(placenta development),GO:0000320(re-entry into mitotic cell cycle),GO:0005634(nucleus),GO:0019005(SCF ubiquitin ligase complex),GO:0005814(centriole),GO:0005515(protein binding)	NA
ENSGALT00000028046	chr13	10778915	10785137	1	ENSGALG00000017362	HAVCR1	hepatitis A virus cellular receptor 1 precursor [Source:RefSeq peptide;Acc:NP_001025788]	7.60476	24.9109	38.9224	78.4466	121.77	73.8329	23.8127	91.3499	down	3.83619	-1.93967	0.0276713	0.050613	yes	GO:0005515(protein binding)	NA
ENSGALT00000045353	chr1	69874095	69938056	1	ENSGALG00000014213	PRR5	Gallus gallus proline rich 5 (renal) (PRR5), mRNA. [Source:RefSeq mRNA;Acc:NM_001029980]	22.7561	28.7125	36.0725	8.84524	7.33846	6.71408	29.1804	7.6326	up	3.82313	1.93475	0.0278055	0.0506004	yes	(),GO:0014068(positive regulation of phosphatidylinositol 3-kinase signaling),GO:0001934(positive regulation of protein phosphorylation),GO:0031932(TORC2 complex)	NA
ENSGALT00000014935	chr3	16243731	16255211	-1	ENSGALG00000009169	TRMT6	Gallus gallus tRNA methyltransferase 6 homolog (S. cerevisiae) (TRMT6), mRNA. [Source:RefSeq mRNA;Acc:NM_001031041]	1.51733	5.31272	3.35469	17.0616	9.51756	12.1869	3.39491	12.922	down	3.80629	-1.92839	0.0319909	0.0505231	yes	GO:0006413(translational initiation),GO:0006446(regulation of translational initiation),GO:0003743(translation initiation factor activity)	NA
ENSGALT00000016368	chr3	28453897	28478662	1	ENSGALG00000010068	KCNK17	potassium channel, subfamily K, member 17 [Source:HGNC Symbol;Acc:14465]	2.2894	2.10631	2.38758	6.78009	8.33104	10.6932	2.2611	8.60143	down	3.8041	-1.92755	0.030164	0.0512503	yes	GO:0006810(transport),GO:0006811(ion transport),GO:0006813(potassium ion transport),GO:0071805(potassium ion transmembrane transport),GO:0016020(membrane),GO:0016021(integral to membrane),GO:0005267(potassium channel activity)	NA
ENSGALT00000019967	chr2	49067176	49085386	-1	ENSGALG00000012226	PPP1R17	protein phosphatase 1, regulatory subunit 17 [Source:HGNC Symbol;Acc:16973]	4.17639	4.9951	3.53278	1.44942	0.193191	1.71834	4.23476	1.12032	up	3.77996	1.91837	0.00812762	0.0493856	yes	GO:0010921(regulation of phosphatase activity),GO:0004864(protein phosphatase inhibitor activity),GO:0004865(protein serine/threonine phosphatase inhibitor activity)	04730(Long-term depression)
ENSGALT00000027403	chr1	165264942	165276995	1	ENSGALG00000016954	RGCC	regulator of cell cycle [Source:HGNC Symbol;Acc:20369]	42.0783	29.4581	43.226	7.86792	7.22968	15.4367	38.2541	10.1781	up	3.75848	1.91015	0.00960749	0.048511	yes	GO:1901991(negative regulation of mitotic cell cycle phase transition),GO:0001100(negative regulation of exit from mitosis),GO:1901313(positive regulation of gene expression involved in extracellular matrix organization),GO:2000353(positive regulation of endothelial cell apoptotic process),GO:0003331(positive regulation of extracellular matrix constituent secretion),GO:2000048(negative regulation…	NA
ENSGALT00000002482	chr18	3633808	3634956	-1	ENSGALG00000001626	UTS2R	urotensin 2 receptor [Source:HGNC Symbol;Acc:4468]	11.5296	8.7075	12.6715	4.61696	2.95386	1.29515	10.9695	2.95532	up	3.71178	1.89211	0.00691794	0.046794	yes	GO:0007165(signal transduction),GO:0007186(G-protein coupled receptor signaling pathway),GO:0008217(regulation of blood pressure),GO:0042312(regulation of vasodilation),GO:0016021(integral to membrane),GO:0001604(urotensin II receptor activity),GO:0004871(signal transducer activity),GO:0004930(G-protein coupled receptor activity)	04080(Neuroactive ligand-receptor interaction)
ENSGALT00000022984	chr1	69852304	69937627	1	ENSGALG00000014213	PRR5	Gallus gallus proline rich 5 (renal) (PRR5), mRNA. [Source:RefSeq mRNA;Acc:NM_001029980]	21.1991	31.2579	39.3836	10.0606	7.45734	7.32803	30.6135	8.28197	up	3.69641	1.88612	0.0477208	0.0501698	yes	(),GO:0014068(positive regulation of phosphatidylinositol 3-kinase signaling),GO:0001934(positive regulation of protein phosphorylation),GO:0031932(TORC2 complex)	NA
ENSGALT00000009439	chr11	17486311	17616586	1	ENSGALG00000005872	BANP	Gallus gallus BTG3 associated nuclear protein (BANP), transcript variant 1, mRNA. [Source:RefSeq mRNA;Acc:NM_001173545]	4.61312	4.6383	5.09961	20.4607	20.3577	12.1501	4.78368	17.6562	down	3.69092	-1.88398	0.0424226	0.0507797	yes	GO:0034504(protein localization to nucleus),GO:0042177(negative regulation of protein catabolic process),GO:0005634(nucleus),GO:0005515(protein binding),GO:0002039(p53 binding)	NA
ENSGALT00000020595	chrZ	41334431	41506455	1	ENSGALG00000012615	C9orf3	chromosome 9 open reading frame 3 [Source:HGNC Symbol;Acc:1361]	0.01	1.54845	2.3103	6.0807	3.86611	4.28891	1.28625	4.74524	down	3.6892	-1.88331	0.0227401	0.0514343	yes	GO:0006508(proteolysis),GO:0019370(leukotriene biosynthetic process),GO:0005730(nucleolus),GO:0004177(aminopeptidase activity),GO:0008237(metallopeptidase activity),GO:0008270(zinc ion binding),GO:0005488(binding)	NA
ENSGALT00000020184	chr7	30263671	30266354	-1	ENSGALG00000012357	CXCR4	Gallus gallus chemokine (C-X-C motif) receptor 4 (CXCR4), mRNA. [Source:RefSeq mRNA;Acc:NM_204617]	76.0834	96.3054	75.0352	24.3258	18.6227	24.121	82.4747	22.3565	up	3.68907	1.88326	0.0091407	0.0485473	yes	GO:0006935(chemotaxis),GO:0007165(signal transduction),GO:0007186(G-protein coupled receptor signaling pathway),GO:0042119(neutrophil activation),GO:0070098(chemokine-mediated signaling pathway),GO:0050920(regulation of chemotaxis),GO:0019722(calcium-mediated signaling),GO:0071345(cellular response to cytokine stimulus),GO:0001666(response to hypoxia),GO:0007420(brain development),GO:0048699(gene…	04060(Cytokine-cytokine receptor interaction),04144(Endocytosis),04670(Leucyte transendothelial migration),04672(Intestinal immune network for IgA production),04062(Chemokine signaling pathway),04360(Axon guidance)
ENSGALT00000026124	chr1	109396355	109434509	1	ENSGALG00000016205	PDXK	Gallus gallus pyridoxal (pyridoxine, vitamin B6) kinase (PDXK), transcript variant 2, mRNA. [Source:RefSeq mRNA;Acc:NM_001278085]	188.145	179.513	265.934	78.9518	45.3273	47.9672	211.197	57.4155	up	3.6784	1.87908	0.0194062	0.0527055	yes	GO:0009443(pyridoxal 5'-phosphate salvage),GO:0042823(pyridoxal phosphate biosynthetic process),GO:0008283(cell proliferation),GO:0005829(cytosol),GO:0005737(cytoplasm),GO:0005634(nucleus),GO:0008478(pyridoxal kinase activity),GO:0031403(lithium ion binding),GO:0031402(sodium ion binding),GO:0030955(potassium ion binding),GO:0030170(pyridoxal phosphate binding),GO:0000287(magnesium ion binding),G…	00750(Vitamin B6 metabolism)
ENSGALT00000037626	chrZ	65783774	65806806	-1	ENSGALG00000023083	KIAA1958	KIAA1958 [Source:HGNC Symbol;Acc:23427]	0.01	0.445294	0.745919	1.41098	1.46274	1.4725	0.397071	1.44874	down	3.64857	-1.86733	0.0390049	0.0497625	yes	()	NA
ENSGALT00000026720	chr1	121427181	121458777	1	ENSGALG00000016558	FIGF	vascular endothelial growth factor D precursor [Source:RefSeq peptide;Acc:NP_989899]	4.26481	0.771559	1.77908	10.6568	6.54509	7.37942	2.27182	8.19377	down	3.6067	-1.85068	0.0233831	0.0509595	yes	GO:0051781(positive regulation of cell division),GO:0060754(positive regulation of mast cell chemotaxis),GO:0050918(positive chemotaxis),GO:0050930(induction of positive chemotaxis),GO:0008284(positive regulation of cell proliferation),GO:0008283(cell proliferation),GO:0048010(vascular endothelial growth factor receptor signaling pathway),GO:0016020(membrane),GO:0005576(extracellular region),GO:0…	04014(Ras signaling pathway),04151(PI3K-Akt signaling pathway),04060(Cytokine-cytokine receptor interaction),04510(Focal adhesion),05200(Pathways in cancer)
ENSGALT00000007787	chr21	6404534	6425874	-1	ENSGALG00000004878	CCDC30	coiled-coil domain containing 30 [Source:HGNC Symbol;Acc:26103]	0.01	0.790235	1.33981	2.03314	3.13782	2.49255	0.710016	2.5545	down	3.59781	-1.84712	0.0229503	0.0509454	yes	()	NA
ENSGALT00000022604	chr4	65555016	65557517	-1	ENSGALG00000013948	RASL11B	RAS-like, family 11, member B [Source:HGNC Symbol;Acc:23804]	0.01	1.82638	3.3668	8.18385	5.25927	5.19762	1.73106	6.21358	down	3.58946	-1.84377	0.0317735	0.0509656	yes	GO:0006184(GTP catabolic process),GO:0007165(signal transduction),GO:0007264(small GTPase mediated signal transduction),GO:0015031(protein transport),GO:0015684(ferrous iron transport),GO:0016020(membrane),GO:0005622(intracellular),GO:0016021(integral to membrane),GO:0000166(nucleotide binding),GO:0003924(GTPase activity),GO:0005525(GTP binding),GO:0015093(ferrous iron transmembrane transporter a…	NA
ENSGALT00000011008	chr9	11035309	11044835	-1	ENSGALG00000006805	novel gene	Uncharacterized protein [Source:UniProtKB/TrEMBL;Acc:F1NX66]	109.498	85.7898	101.474	24.9971	26.8248	31.0244	98.9205	27.6154	up	3.58208	1.8408	0.00655255	0.0469818	yes	()	NA
ENSGALT00000000779	chr26	1580563	1587475	1	ENSGALG00000000560	PI16	peptidase inhibitor 16 [Source:HGNC Symbol;Acc:21245]	0.01	0.818616	2.07496	2.34172	3.84152	4.15074	0.964524	3.44466	down	3.57135	-1.83647	0.0396157	0.04992	yes	GO:0005576(extracellular region)	NA
ENSGALT00000022578	chr4	65084086	65104823	1	ENSGALG00000013931	CHIC2	cysteine-rich hydrophobic domain 2 [Source:HGNC Symbol;Acc:1935]	0.01	7.79525	6.70498	17.0694	21.6362	12.1552	4.83341	16.9536	down	3.50758	-1.81048	0.0303386	0.0510628	yes	GO:0005794(Golgi apparatus),GO:0005798(Golgi-associated vesicle),GO:0005886(plasma membrane),GO:0005515(protein binding)	NA
ENSGALT00000003734	chr8	2632409	2639129	1	ENSGALG00000002369	F13B	coagulation factor XIII, B polypeptide [Source:HGNC Symbol;Acc:3534]	0.01	0.121759	0.161021	0.214339	0.428533	0.348948	0.0942599	0.330607	down	3.50739	-1.8104	0.0436279	0.0505351	yes	()	04610(Complement and coagulation cascades)
ENSGALT00000011555	chr12	11822675	11836270	-1	ENSGALG00000007132	ACOX2	acyl-CoA oxidase 2, branched chain [Source:HGNC Symbol;Acc:120]	0.01	0.630206	1.21225	2.52133	2.28524	1.64191	0.614152	2.1495	down	3.49994	-1.80733	0.0279314	0.0507008	yes	GO:0006631(fatty acid metabolic process),GO:0006635(fatty acid beta-oxidation),GO:0008152(metabolic process),GO:0055114(oxidation-reduction process),GO:0005777(peroxisome),GO:0003995(acyl-CoA dehydrogenase activity),GO:0003997(acyl-CoA oxidase activity),GO:0005102(receptor binding),GO:0016627(oxidoreductase activity, acting on the CH-CH group of donors),GO:0050660(flavin adenine dinucleotide bind…	00120(Primary bile acid biosynthesis),04146(Peroxisome),03320(PPAR signaling pathway)
ENSGALT00000017294	chr4	38883037	38919985	1	ENSGALG00000010628	ACSL1	Gallus gallus acyl-CoA synthetase long-chain family member 1 (ACSL1), mRNA. [Source:RefSeq mRNA;Acc:NM_001012578]	28.5398	29.7216	16.7494	9.14736	4.46535	7.82182	25.0036	7.14484	up	3.49953	1.80716	0.0386386	0.0497376	yes	GO:0001676(long-chain fatty acid metabolic process),GO:0008152(metabolic process),GO:0008610(lipid biosynthetic process),GO:0044539(long-chain fatty acid import),GO:0071902(positive regulation of protein serine/threonine kinase activity),GO:0033211(adiponectin-activated signaling pathway),GO:0005739(mitochondrion),GO:0003824(catalytic activity)	00071(Fatty acid degradation),04146(Peroxisome),04920(Adipocytokine signaling pathway),03320(PPAR signaling pathway)
ENSGALT00000000074	chr11	18290821	18292152	1	ENSGALG00000000059	TUBB3	Gallus gallus tubulin, beta 3 class III (TUBB3), mRNA. [Source:RefSeq mRNA;Acc:NM_001031598]	0.853466	0.807646	0.712053	0.01	0.236877	0.445121	0.791055	0.227333	up	3.47972	1.79897	0.0378565	0.0499873	yes	GO:0006184(GTP catabolic process),GO:0007017(microtubule-based process),GO:0051258(protein polymerization),GO:0007411(axon guidance),GO:0005874(microtubule),GO:0043234(protein complex),GO:0015630(microtubule cytoskeleton),GO:0005737(cytoplasm),GO:0005886(plasma membrane),GO:0005622(intracellular),GO:0030424(axon),GO:0000166(nucleotide binding),GO:0003924(GTPase activity),GO:0005200(structural con…	NA
ENSGALT00000035496	chr26	4693285	4699278	-1	ENSGALG00000023780	TREML2	Gallus gallus triggering receptor expressed on myeloid cells-like 2 (TREML2), transcript variant 2, mRNA. [Source:RefSeq mRNA;Acc:NM_001080868]	8.7459	4.13818	6.06102	18.2117	21.69	25.9263	6.31503	21.9427	down	3.47467	-1.79688	0.00717232	0.0471794	yes	GO:0005515(protein binding)	NA
ENSGALT00000031464	chr27	2671507	2696162	1	ENSGALG00000000505	KCNH6	potassium voltage-gated channel, subfamily H (eag-related), member 6 [Source:HGNC Symbol;Acc:18862]	0.42354	0.300602	0.38281	0.01	0.156737	0.16199	0.368984	0.106242	up	3.47304	1.7962	0.0193344	0.0529114	yes	GO:0006810(transport),GO:0006811(ion transport),GO:0006813(potassium ion transport),GO:0007165(signal transduction),GO:0042391(regulation of membrane potential),GO:0055085(transmembrane transport),GO:0071805(potassium ion transmembrane transport),GO:0006355(regulation of transcription, DNA-dependent),GO:0005887(integral to plasma membrane),GO:0016020(membrane),GO:0016021(integral to membrane),GO:…	NA
ENSGALT00000014067	chr5	24215769	24250023	1	ENSGALG00000008631	TYRO3	Gallus gallus TYRO3 protein tyrosine kinase (TYRO3), mRNA. [Source:RefSeq mRNA;Acc:NM_204627]	16.2895	11.8749	11.22	50.0119	49.7321	35.8202	13.1281	45.1881	down	3.44209	-1.78328	0.0133721	0.0526801	yes	GO:0001779(natural killer cell differentiation),GO:0006468(protein phosphorylation),GO:0007283(spermatogenesis),GO:0016310(phosphorylation),GO:0018108(peptidyl-tyrosine phosphorylation),GO:0021885(forebrain cell migration),GO:0030168(platelet activation),GO:0032940(secretion by cell),GO:0034122(negative regulation of toll-like receptor signaling pathway),GO:0034446(substrate adhesion-dependent ce…	NA
ENSGALT00000042940	chr1	51497130	51548816	1	ENSGALG00000027830	CACNG2	calcium channel, voltage-dependent, gamma subunit 2 [Source:HGNC Symbol;Acc:1406]	0.82269	0.800148	0.724508	0.114206	0.177594	0.390931	0.782449	0.227577	up	3.43817	1.78164	0.0139481	0.0531957	yes	GO:0006816(calcium ion transport),GO:0070588(calcium ion transmembrane transport),GO:0042391(regulation of membrane potential),GO:0051899(membrane depolarization),GO:0060081(membrane hyperpolarization),GO:0007528(neuromuscular junction development),GO:0050877(neurological system process),GO:0019226(transmission of nerve impulse),GO:0005891(voltage-gated calcium channel complex),GO:0016020(membran…	04010(MAPK signaling pathway),04260(Cardiac muscle contraction),05410(Hypertrophic cardiomyopathy (HCM)),05412(Arrhythmogenic right ventricular cardiomyopathy (ARVC)),05414(Dilated cardiomyopathy (DCM))
ENSGALT00000041241	chr13	1408177	1457586	1	ENSGALG00000002553	PCDH1	Gallus gallus protocadherin 1 (PCDH1), mRNA. [Source:RefSeq mRNA;Acc:NM_001045827]	20.3638	14.8376	21.3256	3.12139	8.10501	5.35458	18.8423	5.52699	up	3.40915	1.76941	0.00773123	0.0486254	yes	GO:0007155(cell adhesion),GO:0007156(homophilic cell adhesion),GO:0005886(plasma membrane),GO:0016020(membrane),GO:0016021(integral to membrane),GO:0005509(calcium ion binding),GO:0005515(protein binding)	NA
ENSGALT00000006013	chr17	6139036	6144623	-1	ENSGALG00000003789	FAM78A	family with sequence similarity 78, member A [Source:HGNC Symbol;Acc:25465]	0.01	8.45903	9.1891	15.1568	26.5819	18.2486	5.88271	19.9958	down	3.39908	-1.76514	0.0362141	0.0504185	yes	()	NA
ENSGALT00000016012	chr5	32087430	32252427	-1	ENSGALG00000009850	NOVA1	Gallus gallus neuro-oncological ventral antigen 1 (NOVA1), transcript variant 2, mRNA. [Source:RefSeq mRNA;Acc:NM_001199713]	2.69112	9.12548	6.92277	22.415	25.6441	15.6261	6.24646	21.2284	down	3.39847	-1.76489	0.018173	0.0529675	yes	GO:0000398(mRNA splicing, via spliceosome),GO:0003723(RNA binding),GO:0003729(mRNA binding)	NA
ENSGALT00000006617	chr18	8080242	8086435	-1	ENSGALG00000004162	SLC16A6	solute carrier family 16, member 6 [Source:HGNC Symbol;Acc:10927]	23.3575	19.1478	12.7461	5.20309	7.01049	4.07955	18.4171	5.43104	up	3.39108	1.76175	0.0436876	0.0502793	yes	GO:0055085(transmembrane transport),GO:0016021(integral to membrane),GO:0022857(transmembrane transporter activity)	NA
ENSGALT00000013873	chr17	1933420	1939035	1	ENSGALG00000008518	novel gene	Glutamine synthetase [Source:UniProtKB/TrEMBL;Acc:F1P0D2]	40.4627	46.464	53.8835	11.5366	18.6596	11.3632	46.9367	13.8532	up	3.38816	1.7605	0.00375527	0.0489551	yes	GO:0006542(glutamine biosynthetic process),GO:0006807(nitrogen compound metabolic process),GO:0000166(nucleotide binding),GO:0003824(catalytic activity),GO:0004356(glutamate-ammonia ligase activity),GO:0005524(ATP binding),GO:0016874(ligase activity)	01230(Biosynthesis of amino acids),00630(Glyoxylate and dicarboxylate metabolism),00910(Nitrogen metabolism),00250(Alanine),00330(Arginine and proline metabolism),02020(Two-component system),04724(Glutamatergic synapse),04727(GABAergic synapse)
ENSGALT00000002218	chr23	3162645	3168327	-1	ENSGALG00000001463	PDIK1L	PDLIM1 interacting kinase 1 like [Source:HGNC Symbol;Acc:18981]	3.65996	3.58717	4.68936	14.8069	12.9153	12.6801	3.97883	13.4675	down	3.38478	-1.75906	0.00104862	0.0501239	yes	GO:0006468(protein phosphorylation),GO:0000166(nucleotide binding),GO:0004672(protein kinase activity),GO:0004674(protein serine/threonine kinase activity),GO:0005524(ATP binding),GO:0016772(transferase activity, transferring phosphorus-containing groups),GO:0004713(protein tyrosine kinase activity)	NA
ENSGALT00000018930	chr2	42311907	42316295	-1	ENSGALG00000011595	ASTE1	asteroid homolog 1 (Drosophila) [Source:HGNC Symbol;Acc:25021]	0.01	0.612921	1.08075	2.03804	2.23709	1.44129	0.564558	1.90547	down	3.37516	-1.75495	0.0301282	0.051311	yes	()	NA
ENSGALT00000011565	chr10	16971772	17036545	1	ENSGALG00000007141	LRRK1	leucine-rich repeat kinase 1 [Source:HGNC Symbol;Acc:18608]	3.65366	4.59691	5.47304	12.8299	19.0367	14.231	4.57453	15.3659	down	3.35901	-1.74803	0.022402	0.0516472	yes	GO:0006468(protein phosphorylation),GO:0007264(small GTPase mediated signal transduction),GO:0005622(intracellular),GO:0005739(mitochondrion),GO:0005737(cytoplasm),GO:0004672(protein kinase activity),GO:0005524(ATP binding),GO:0005525(GTP binding),GO:0016772(transferase activity, transferring phosphorus-containing groups),GO:0005515(protein binding),GO:0004713(protein tyrosine kinase activity),GO…	NA
ENSGALT00000023982	chrZ	13514301	13524158	-1	ENSGALG00000014862	HMGCS1	Gallus gallus 3-hydroxy-3-methylglutaryl-CoA synthase 1 (soluble) (HMGCS1), mRNA. [Source:RefSeq mRNA;Acc:NM_205411]	66.4234	39.5768	46.2383	23.5646	10.4696	11.348	50.7462	15.1274	up	3.35458	1.74613	0.0293736	0.0514935	yes	GO:0008152(metabolic process),GO:0008299(isoprenoid biosynthetic process),GO:0005634(nucleus),GO:0005737(cytoplasm),GO:0005886(plasma membrane),GO:0003824(catalytic activity),GO:0004421(hydroxymethylglutaryl-CoA synthase activity)	00650(Butanoate metabolism),00072(Synthesis and degradation of ketone bodies),00280(Valine),00900(Terpenoid backbone biosynthesis)
ENSGALT00000025711	chr2	125802915	125811572	-1	ENSGALG00000015954	GEM	Gallus gallus GTP binding protein overexpressed in skeletal muscle (GEM), mRNA. [Source:RefSeq mRNA;Acc:NM_213579]	7.65517	2.66331	2.53592	15.3778	9.43605	18.2247	4.2848	14.3462	down	3.34816	-1.74337	0.0388522	0.0497447	yes	GO:0006184(GTP catabolic process),GO:0007165(signal transduction),GO:0007264(small GTPase mediated signal transduction),GO:0015031(protein transport),GO:0015684(ferrous iron transport),GO:0051276(chromosome organization),GO:0007067(mitosis),GO:0005634(nucleus),GO:0009898(cytoplasmic side of plasma membrane),GO:0016020(membrane),GO:0005622(intracellular),GO:0016021(integral to membrane),GO:0051233…	NA
ENSGALT00000009498	chr14	6498475	6504441	-1	ENSGALG00000005905	ZDHHC4	zinc finger, DHHC-type containing 4 [Source:HGNC Symbol;Acc:18471]	1.8246	1.61873	2.28341	6.07901	7.08978	5.89999	1.90891	6.35626	down	3.32978	-1.73543	0.00168093	0.0401742	yes	GO:0016020(membrane),GO:0016021(integral to membrane),GO:0008270(zinc ion binding),GO:0016740(transferase activity),GO:0016746(transferase activity, transferring acyl groups),GO:0046872(metal ion binding)	NA
ENSGALT00000000877	chr28	849861	858519	-1	ENSGALG00000000619	ANGPTL4	angiopoietin-like 4 [Source:HGNC Symbol;Acc:16039]	19.2466	22.8479	14.7314	4.22244	8.48972	4.37369	18.942	5.69528	up	3.32591	1.73375	0.013792	0.0537438	yes	GO:0043066(negative regulation of apoptotic process),GO:0051005(negative regulation of lipoprotein lipase activity),GO:0070328(triglyceride homeostasis),GO:2000352(negative regulation of endothelial cell apoptotic process),GO:0005576(extracellular region),GO:0005615(extracellular space),GO:0004857(enzyme inhibitor activity),GO:0005515(protein binding)	03320(PPAR signaling pathway)
ENSGALT00000024033	chr3	62772789	62787619	-1	ENSGALG00000014899	NUS1	nuclear undecaprenyl pyrophosphate synthase 1 homolog (S. cerevisiae) [Source:HGNC Symbol;Acc:21042]	161.788	86.794	146.578	62.8235	19.2265	36.7944	131.72	39.6148	up	3.32502	1.73336	0.0365424	0.0501933	yes	GO:0032367(intracellular cholesterol transport),GO:0055092(sterol homeostasis),GO:0005789(endoplasmic reticulum membrane),GO:0016765(transferase activity, transferring alkyl or aryl (other than methyl) groups),GO:0005515(protein binding)	NA
ENSGALT00000045398	chr2	12931287	12938084	-1	ENSGALG00000007082	CREM	Gallus gallus cAMP responsive element modulator (CREM), transcript variant 2, mRNA. [Source:RefSeq mRNA;Acc:NM_001278133]	48.4334	26.7666	41.1357	18.7184	7.63538	8.6491	38.7785	11.6676	up	3.3236	1.73275	0.0314084	0.0512979	yes	GO:0006355(regulation of transcription, DNA-dependent),GO:0045944(positive regulation of transcription from RNA polymerase II promoter),GO:0006687(glycosphingolipid metabolic process),GO:0005634(nucleus),GO:0005667(transcription factor complex),GO:0003677(DNA binding),GO:0003700(sequence-specific DNA binding transcription factor activity),GO:0043565(sequence-specific DNA binding),GO:0005515(prote…	05166(HTLV-I infection)
ENSGALT00000013252	chr7	10674757	10681694	-1	ENSGALG00000008155	KCTD18	potassium channel tetramerization domain containing 18 [Source:HGNC Symbol;Acc:26446]	0.367089	1.65006	2.67982	5.80939	5.39988	4.36514	1.56566	5.19147	down	3.31585	-1.72938	0.0149007	0.0539585	yes	GO:0051260(protein homooligomerization)	NA
ENSGALT00000002119	chr21	2032009	2039306	-1	ENSGALG00000001392	MMP23B	matrix metallopeptidase 23B [Source:HGNC Symbol;Acc:7171]	11.8791	8.05127	6.29474	4.27867	1.42574	2.21029	8.74172	2.63824	up	3.31347	1.72834	0.0461969	0.050035	yes	GO:0000003(reproduction),GO:0006508(proteolysis),GO:0031012(extracellular matrix),GO:0004222(metalloendopeptidase activity),GO:0008233(peptidase activity),GO:0008237(metallopeptidase activity),GO:0008270(zinc ion binding),GO:0016787(hydrolase activity),GO:0046872(metal ion binding),GO:0005515(protein binding)	NA
ENSGALT00000006688	chr14	2619607	2622376	-1	ENSGALG00000004203	PSMG3	Gallus gallus proteasome (prosome, macropain) assembly chaperone 3 (PSMG3), mRNA. [Source:RefSeq mRNA;Acc:NM_001277539]	2.75664	7.60855	7.66629	21.2387	19	19.3612	6.01049	19.8666	down	3.30532	-1.72479	0.00621252	0.0468882	yes	()	NA
ENSGALT00000020720	chr2	60595346	60602810	1	ENSGALG00000012692	SIRT5	Gallus gallus sirtuin 5 (SIRT5), nuclear gene encoding mitochondrial protein, transcript variant 1, mRNA. [Source:RefSeq mRNA;Acc:NM_001276364]	21.4775	31.784	21.7313	5.13837	8.11714	9.48552	24.9976	7.58034	up	3.29769	1.72145	0.0244818	0.0511763	yes	GO:0036047(peptidyl-lysine demalonylation),GO:0036049(peptidyl-lysine desuccinylation),GO:0036048(protein desuccinylation),GO:0006476(protein deacetylation),GO:2000378(negative regulation of reactive oxygen species metabolic process),GO:0005739(mitochondrion),GO:0005758(mitochondrial intermembrane space),GO:0005759(mitochondrial matrix),GO:0005829(cytosol),GO:0036054(protein-malonyllysine demalon…	NA
ENSGALT00000008855	chr6	16142744	16223667	-1	ENSGALG00000005519	TLL2	tolloid-like 2 [Source:HGNC Symbol;Acc:11844]	7.38803	7.41328	5.04801	26.6836	18.1366	20.4884	6.61644	21.7695	down	3.29021	-1.71818	0.0197397	0.052811	yes	GO:0006508(proteolysis),GO:0004222(metalloendopeptidase activity),GO:0005509(calcium ion binding),GO:0008233(peptidase activity),GO:0008237(metallopeptidase activity),GO:0008270(zinc ion binding),GO:0016787(hydrolase activity),GO:0046872(metal ion binding),GO:0005515(protein binding)	NA
ENSGALT00000028081	chr3	22667612	22700224	1	ENSGALG00000017393	PKDCC	protein kinase domain containing, cytoplasmic [Source:HGNC Symbol;Acc:25123]	9.31553	6.37201	8.49008	23.9521	21.2461	33.8192	8.05921	26.3391	down	3.2682	-1.7085	0.0354187	0.050588	yes	GO:0035264(multicellular organism growth),GO:0001501(skeletal system development),GO:0048286(lung alveolus development),GO:0060021(palate development),GO:0030282(bone mineralization),GO:0032332(positive regulation of chondrocyte differentiation),GO:0030501(positive regulation of bone mineralization),GO:0048566(embryonic digestive tract development),GO:0042997(negative regulation of Golgi to plasm…	NA
ENSGALT00000039448	chr9	18759709	18766320	1	ENSGALG00000009179	TNFSF10	Gallus gallus tumor necrosis factor (ligand) superfamily, member 10 (TNFSF10), mRNA. [Source:RefSeq mRNA;Acc:NM_204379]	3.06478	10.6946	4.95412	23.1341	20.6276	17.3029	6.23784	20.3549	down	3.26312	-1.70625	0.00959777	0.0488057	yes	GO:0006955(immune response),GO:0090200(positive regulation of release of cytochrome c from mitochondria),GO:2001238(positive regulation of extrinsic apoptotic signaling pathway),GO:0043280(positive regulation of cysteine-type endopeptidase activity involved in apoptotic process),GO:0043065(positive regulation of apoptotic process),GO:0043123(positive regulation of I-kappaB kinase/NF-kappaB signal…	04060(Cytokine-cytokine receptor interaction),04210(Apoptosis),04650(Natural killer cell mediated cytotoxicity),05162(Measles),05164(Influenza A)
ENSGALT00000008883	chr15	7048112	7093354	1	ENSGALG00000005538	MYO18B	myosin XVIIIB [Source:HGNC Symbol;Acc:18150]	1.75382	1.74264	1.63881	0.01	0.81777	0.761027	1.71176	0.526266	up	3.25265	1.70161	0.0437277	0.0501645	yes	GO:0001570(vasculogenesis),GO:0001701(in utero embryonic development),GO:0048739(cardiac muscle fiber development),GO:0016459(myosin complex),GO:0030018(Z disc),GO:0031941(filamentous actin),GO:0000166(nucleotide binding),GO:0003774(motor activity),GO:0005524(ATP binding),GO:0005515(protein binding)	NA
ENSGALT00000016809	chr5	37575337	37599366	1	ENSGALG00000010326	FLVCR2	feline leukemia virus subgroup C cellular receptor family, member 2 [Source:HGNC Symbol;Acc:20105]	25.2427	20.7718	24.0361	7.08461	6.92991	7.58432	23.3502	7.19961	up	3.24326	1.69744	0.00589404	0.0469558	yes	GO:0015886(heme transport),GO:0055085(transmembrane transport),GO:0016021(integral to membrane),GO:0015232(heme transporter activity),GO:0020037(heme binding)	NA
ENSGALT00000043389	chr18	1645205	1650946	1	ENSGALG00000029014	PIRT	phosphoinositide-interacting regulator of transient receptor potential channels [Source:HGNC Symbol;Acc:37239]	1.87409	1.27469	1.2704	0.0975612	0.780225	0.488713	1.47306	0.4555	up	3.23394	1.6933	0.0225037	0.0517151	yes	()	NA
ENSGALT00000014953	chr9	18760143	18766555	1	ENSGALG00000009179	TNFSF10	Gallus gallus tumor necrosis factor (ligand) superfamily, member 10 (TNFSF10), mRNA. [Source:RefSeq mRNA;Acc:NM_204379]	3.60721	11.7341	5.07858	24.2241	22.4013	19.3306	6.80663	21.9853	down	3.22999	-1.69153	0.0114758	0.0504795	yes	GO:0006955(immune response),GO:0090200(positive regulation of release of cytochrome c from mitochondria),GO:2001238(positive regulation of extrinsic apoptotic signaling pathway),GO:0043280(positive regulation of cysteine-type endopeptidase activity involved in apoptotic process),GO:0043065(positive regulation of apoptotic process),GO:0043123(positive regulation of I-kappaB kinase/NF-kappaB signal…	04060(Cytokine-cytokine receptor interaction),04210(Apoptosis),04650(Natural killer cell mediated cytotoxicity),05162(Measles),05164(Influenza A)
ENSGALT00000024042	chr3	62847768	62894456	-1	ENSGALG00000014907	DCBLD1	discoidin, CUB and LCCL domain containing 1 [Source:HGNC Symbol;Acc:21479]	2.05244	3.19663	2.31883	10.3996	6.78834	7.08277	2.52263	8.09025	down	3.20706	-1.68125	0.0320191	0.0503458	yes	GO:0007155(cell adhesion)	NA
ENSGALT00000007370	chr12	3145246	3161321	1	ENSGALG00000004626	RBM5	RNA binding motif protein 5 [Source:HGNC Symbol;Acc:9902]	36.3048	34.0225	52.7126	152.76	124.912	116.872	41.0133	131.515	down	3.20663	-1.68106	0.00481768	0.0460571	yes	GO:0000245(spliceosomal complex assembly),GO:0043065(positive regulation of apoptotic process),GO:0000381(regulation of alternative mRNA splicing, via spliceosome),GO:0005634(nucleus),GO:0000166(nucleotide binding),GO:0003676(nucleic acid binding),GO:0008270(zinc ion binding),GO:0046872(metal ion binding),GO:0003729(mRNA binding),GO:0005515(protein binding)	NA
ENSGALT00000032496	chr5	50375579	50384291	-1	ENSGALG00000011533	XRCC3	Gallus gallus X-ray repair complementing defective repair in Chinese hamster cells 3 (XRCC3), mRNA. [Source:RefSeq mRNA;Acc:NM_001006489]	1.57259	4.77452	2.13204	11.7886	6.40154	8.96727	2.82638	9.05248	down	3.20285	-1.67936	0.0359048	0.0506767	yes	GO:0006259(DNA metabolic process),GO:0006281(DNA repair),GO:0005634(nucleus),GO:0005737(cytoplasm),GO:0005739(mitochondrion),GO:0048471(perinuclear region of cytoplasm),GO:0003677(DNA binding),GO:0005524(ATP binding),GO:0008094(DNA-dependent ATPase activity),GO:0005515(protein binding)	03440(Homologous recombination)
ENSGALT00000027463	chr1	168208055	168209020	1	ENSGALG00000017001	CYSLTR2	cysteinyl leukotriene receptor 2 [Source:HGNC Symbol;Acc:18274]	39.0315	24.0833	42.0255	91.5999	124.873	119.114	35.0468	111.863	down	3.19181	-1.67437	0.00659592	0.0468245	yes	GO:0007186(G-protein coupled receptor signaling pathway),GO:0016020(membrane),GO:0016021(integral to membrane),GO:0001631(cysteinyl leukotriene receptor activity),GO:0004930(G-protein coupled receptor activity)	04020(Calcium signaling pathway),04080(Neuroactive ligand-receptor interaction)
ENSGALT00000001544	chr21	994531	1027576	1	ENSGALG00000001040	MEGF6	multiple EGF-like-domains 6 [Source:HGNC Symbol;Acc:3232]	0.01	0.2133	0.14104	0.375484	0.281518	0.470228	0.118113	0.375743	down	3.18121	-1.66957	0.0370323	0.0501932	yes	GO:0001558(regulation of cell growth),GO:0005576(extracellular region),GO:0005509(calcium ion binding),GO:0005520(insulin-like growth factor binding),GO:0005515(protein binding)	NA
ENSGALT00000002894	chrZ	68538794	68553327	-1	ENSGALG00000001864	C9orf72	chromosome 9 open reading frame 72 [Source:HGNC Symbol;Acc:28337]	5.15301	4.46008	3.7749	17.5347	12.1393	12.6773	4.46266	14.1171	down	3.16337	-1.66146	0.0252121	0.0513553	yes	()	NA
ENSGALT00000004050	chr8	3667316	3672669	1	ENSGALG00000002564	RGS4	Gallus gallus regulator of G-protein signaling 4 (RGS4), mRNA. [Source:RefSeq mRNA;Acc:NM_204385]	11.1829	11.6297	7.67777	4.17211	3.62107	1.87122	10.1634	3.22147	up	3.15491	1.6576	0.0151385	0.0542716	yes	GO:0038032(termination of G-protein coupled receptor signaling pathway)	NA
ENSGALT00000010073	chr20	10360604	10377592	-1	ENSGALG00000006211	BCL2L1	Gallus gallus BCL2-like 1 (BCL2L1), nuclear gene encoding mitochondrial protein, mRNA. [Source:RefSeq mRNA;Acc:NM_001025304]	93.9722	91.5787	92.8773	18.4908	30.3888	39.8381	92.8094	29.5726	up	3.13836	1.65001	0.00875308	0.049417	yes	GO:0000910(cytokinesis),GO:0007093(mitotic cell cycle checkpoint),GO:0019050(suppression by virus of host apoptotic process),GO:0034097(response to cytokine),GO:0042981(regulation of apoptotic process),GO:0043066(negative regulation of apoptotic process),GO:0046902(regulation of mitochondrial membrane permeability),GO:0051881(regulation of mitochondrial membrane potential),GO:0090005(negative reg…	04014(Ras signaling pathway),04630(Jak-STAT signaling pathway),04064(NF-kappa B signaling pathway),04151(PI3K-Akt signaling pathway),04210(Apoptosis),05200(Pathways in cancer),05202(Transcriptional misregulation in cancers),05212(Pancreatic cancer),05220(Chronic myeloid leukemia),05222(Small cell lung cancer),05014(Amyotrophic lateral sclerosis (ALS)),05166(HTLV-I infection),05145(Toxoplasmosis)
ENSGALT00000043839	chr18	3059724	3076510	-1	ENSGALG00000028354	METRNL	meteorin, glial cell differentiation regulator-like [Source:HGNC Symbol;Acc:27584]	43.4238	35.7639	38.6835	14.9576	13.9107	8.805	39.2904	12.5578	up	3.12877	1.6456	0.000901276	0.0497088	yes	()	NA
ENSGALT00000022420	chr2	97173755	97193841	-1	ENSGALG00000013814	IMPA2	inositol(myo)-1(or 4)-monophosphatase 2 [Source:HGNC Symbol;Acc:6051]	25.9167	14.9738	17.6878	10.9402	4.40395	3.40218	19.5261	6.24877	up	3.12479	1.64376	0.0352496	0.0507509	yes	GO:0046854(phosphatidylinositol phosphorylation),GO:0046855(inositol phosphate dephosphorylation),GO:0005737(cytoplasm),GO:0008934(inositol monophosphate 1-phosphatase activity),GO:0042803(protein homodimerization activity)	00562(Inositol phosphate metabolism),00521(Streptomycin biosynthesis),04070(Phosphatidylinositol signaling system)
ENSGALT00000017617	chr4	43775824	43808347	-1	ENSGALG00000010837	ASB5	ankyrin repeat and SOCS box containing 5 [Source:HGNC Symbol;Acc:17180]	10.8837	8.48747	6.64212	2.35027	1.79007	4.20471	8.6711	2.78168	up	3.11721	1.64026	0.0220487	0.0520031	yes	GO:0016567(protein ubiquitination),GO:0035556(intracellular signal transduction),GO:0005515(protein binding)	NA
ENSGALT00000003836	chr7	331708	343582	1	ENSGALG00000002433	SLC40A1	Gallus gallus solute carrier family 40 (iron-regulated transporter), member 1 (SLC40A1), mRNA. [Source:RefSeq mRNA;Acc:NM_001012913]	231.511	70.171	61.8655	469.032	351.094	307.219	121.182	375.782	down	3.10096	-1.63272	0.0263089	0.0512594	yes	GO:0034755(iron ion transmembrane transport),GO:0006879(cellular iron ion homeostasis),GO:0043066(negative regulation of apoptotic process),GO:0006826(iron ion transport),GO:0048536(spleen development),GO:0060586(multicellular organismal iron ion homeostasis),GO:0002260(lymphocyte homeostasis),GO:0003158(endothelium development),GO:0060345(spleen trabecula formation),GO:0016021(integral to membra…	04978(Mineral absorption)
ENSGALT00000026176	chr2	141410203	141432079	-1	ENSGALG00000016234	SLA	Gallus gallus Src-like-adaptor (SLA), mRNA. [Source:RefSeq mRNA;Acc:NM_204391]	119.232	93.6307	124.117	42.413	24.2651	43.0965	112.327	36.5915	up	3.06975	1.61812	0.00432605	0.0477196	yes	GO:0005515(protein binding)	NA
ENSGALT00000011595	chr14	8935374	8936082	1	ENSGALG00000007158	SOCS1	Gallus gallus suppressor of cytokine signaling 1 (SOCS1), mRNA. [Source:RefSeq mRNA;Acc:NM_001137648]	43.1187	42.3339	45.7173	7.7815	21.9404	13.1182	43.7233	14.28	up	3.06185	1.6144	0.0148032	0.0538777	yes	GO:0001932(regulation of protein phosphorylation),GO:0007259(JAK-STAT cascade),GO:0016567(protein ubiquitination),GO:0019221(cytokine-mediated signaling pathway),GO:0035556(intracellular signal transduction),GO:0042518(negative regulation of tyrosine phosphorylation of Stat3 protein),GO:0045444(fat cell differentiation),GO:0046426(negative regulation of JAK-STAT cascade),GO:0046627(negative regul…	04120(Ubiquitin mediated proteolysis),04630(Jak-STAT signaling pathway),04910(Insulin signaling pathway),04917(Prolactin signaling pathway),04380(Osteoclast differentiation),05206(MicroRNAs in cancer),04930(Type II diabetes mellitus),05145(Toxoplasmosis)
ENSGALT00000021025	chr2	68296155	68319337	-1	ENSGALG00000012891	TNFRSF11A	tumor necrosis factor receptor superfamily, member 11a, NFKB activator [Source:HGNC Symbol;Acc:11908]	53.2773	60.0733	40.459	17.0394	15.8763	17.3883	51.2699	16.768	up	3.0576	1.6124	0.0260491	0.0513111	yes	GO:0071848(positive regulation of ERK1 and ERK2 cascade via TNFSF11-mediated signaling),GO:0071847(TNFSF11-mediated signaling pathway),GO:0002250(adaptive immune response),GO:0043507(positive regulation of JUN kinase activity),GO:0030316(osteoclast differentiation),GO:0051092(positive regulation of NF-kappaB transcription factor activity),GO:0051091(positive regulation of sequence-specific DNA bi…	04064(NF-kappa B signaling pathway),04060(Cytokine-cytokine receptor interaction),04917(Prolactin signaling pathway),04380(Osteoclast differentiation),05323(Rheumatoid arthritis)
ENSGALT00000027863	chr1	186948732	187052406	1	ENSGALG00000017235	NOX4	NADPH oxidase 4 [Source:HGNC Symbol;Acc:7891]	0.01	2.32535	3.49075	7.52309	4.12893	6.12388	1.9387	5.9253	down	3.05633	-1.6118	0.0487515	0.0497932	yes	GO:0055114(oxidation-reduction process),GO:0050667(homocysteine metabolic process),GO:0072593(reactive oxygen species metabolic process),GO:0008285(negative regulation of cell proliferation),GO:0051897(positive regulation of protein kinase B signaling),GO:0000902(cell morphogenesis),GO:0070374(positive regulation of ERK1 and ERK2 cascade),GO:0043406(positive regulation of MAP kinase activity),GO:…	NA
ENSGALT00000005772	chr10	3925576	3927300	1	ENSGALG00000003644	novel gene	Uncharacterized protein [Source:UniProtKB/TrEMBL;Acc:F1NT88]	3.52365	6.25214	5.21815	1.02723	1.46697	2.42582	4.99798	1.64	up	3.04754	1.60764	0.0330797	0.0507884	yes	GO:0005515(protein binding)	NA
ENSGALT00000010026	chr20	10359785	10375085	-1	ENSGALG00000006211	BCL2L1	Gallus gallus BCL2-like 1 (BCL2L1), nuclear gene encoding mitochondrial protein, mRNA. [Source:RefSeq mRNA;Acc:NM_001025304]	70.3147	78.3952	85.0957	15.188	28.0356	33.744	77.9352	25.6559	up	3.03771	1.60299	0.00210694	0.0377668	yes	GO:0000910(cytokinesis),GO:0007093(mitotic cell cycle checkpoint),GO:0019050(suppression by virus of host apoptotic process),GO:0034097(response to cytokine),GO:0042981(regulation of apoptotic process),GO:0043066(negative regulation of apoptotic process),GO:0046902(regulation of mitochondrial membrane permeability),GO:0051881(regulation of mitochondrial membrane potential),GO:0090005(negative reg…	04014(Ras signaling pathway),04630(Jak-STAT signaling pathway),04064(NF-kappa B signaling pathway),04151(PI3K-Akt signaling pathway),04210(Apoptosis),05200(Pathways in cancer),05202(Transcriptional misregulation in cancers),05212(Pancreatic cancer),05220(Chronic myeloid leukemia),05222(Small cell lung cancer),05014(Amyotrophic lateral sclerosis (ALS)),05166(HTLV-I infection),05145(Toxoplasmosis)
ENSGALT00000028001	chr1	194498168	194499330	1	ENSGALG00000017327	P2RY3	Gallus gallus pyrimidinergic receptor P2Y, G-protein coupled, 6 (P2RY6), mRNA. [Source:RefSeq mRNA;Acc:NM_205195]	4.81918	10.8829	6.94481	21.5297	28.9398	18.1881	7.54897	22.8859	down	3.03165	-1.6001	0.0223146	0.0517785	yes	GO:0007165(signal transduction),GO:0007186(G-protein coupled receptor signaling pathway),GO:0007200(phospholipase C-activating G-protein coupled receptor signaling pathway),GO:0030321(transepithelial chloride transport),GO:0035589(G-protein coupled purinergic nucleotide receptor signaling pathway),GO:0005886(plasma membrane),GO:0016020(membrane),GO:0016021(integral to membrane),GO:0004871(signal …	04080(Neuroactive ligand-receptor interaction)
ENSGALT00000024407	chr2	103913222	103977131	-1	ENSGALG00000015124	KCTD1	potassium channel tetramerization domain containing 1 [Source:HGNC Symbol;Acc:18249]	3.92609	1.54805	1.72877	5.6319	9.92816	6.14291	2.40097	7.23432	down	3.01309	-1.59124	0.0495351	0.0499531	yes	GO:0051260(protein homooligomerization),GO:0045892(negative regulation of transcription, DNA-dependent),GO:0005634(nucleus),GO:0005515(protein binding),GO:0008134(transcription factor binding),GO:0003714(transcription corepressor activity)	NA
ENSGALT00000045939	chr1	36352625	36370277	1	ENSGALG00000027799	TMEM19	transmembrane protein 19 [Source:HGNC Symbol;Acc:25605]	8.70486	8.42999	8.45033	2.98151	3.27404	2.27423	8.52839	2.84326	up	2.99951	1.58473	0.00135662	0.0486348	yes	GO:0016021(integral to membrane)	NA
ENSGALT00000019739	chr2	46837810	46839146	-1	ENSGALG00000012083	GPR141	G protein-coupled receptor 141 [Source:HGNC Symbol;Acc:19997]	3.57557	4.22952	5.84196	12.4091	10.7509	17.5915	4.54902	13.5838	down	2.98611	-1.57827	0.0376918	0.0500464	yes	GO:0007186(G-protein coupled receptor signaling pathway),GO:0016021(integral to membrane),GO:0004930(G-protein coupled receptor activity)	NA
ENSGALT00000023805	chr2	99504540	99577762	-1	ENSGALG00000014758	ARHGAP28	Rho GTPase activating protein 28 [Source:HGNC Symbol;Acc:25509]	10.4294	6.88807	7.38706	26.8751	25.7503	20.6697	8.23484	24.4317	down	2.96687	-1.56894	0.00414517	0.0479369	yes	GO:0007165(signal transduction),GO:0005622(intracellular),GO:0005634(nucleus)	NA
ENSGALT00000040292	chr26	3082074	3082959	1	ENSGALG00000023933	GOS2	Gallus gallus G0/G1switch 2 (G0S2), mRNA. [Source:RefSeq mRNA;Acc:NM_001190924]	77.2661	50.3548	45.4591	25.8035	13.5549	19.0084	57.6933	19.4556	up	2.96539	1.56822	0.0478884	0.0499796	yes	GO:0097191(extrinsic apoptotic signaling pathway),GO:2001238(positive regulation of extrinsic apoptotic signaling pathway),GO:0005739(mitochondrion),GO:0005515(protein binding)	NA
ENSGALT00000005327	chr27	4827918	4832197	-1	ENSGALG00000003369	KAT2A	K(lysine) acetyltransferase 2A [Source:HGNC Symbol;Acc:4201]	2.10352	1.99059	3.50996	9.14971	7.84923	5.48541	2.53469	7.49478	down	2.95688	-1.56408	0.0281187	0.0509119	yes	GO:0006355(regulation of transcription, DNA-dependent),GO:0016573(histone acetylation),GO:0016578(histone deubiquitination),GO:0043966(histone H3 acetylation),GO:0031647(regulation of protein stability),GO:0035264(multicellular organism growth),GO:0001701(in utero embryonic development),GO:0008283(cell proliferation),GO:0001756(somitogenesis),GO:0001843(neural tube closure),GO:0007399(nervous sys…	04330(Notch signaling pathway),05203(Viral carcinogenesis),05166(HTLV-I infection)
ENSGALT00000009310	chr15	7713031	7716156	-1	ENSGALG00000005796	XBP1	Gallus gallus X-box binding protein 1 (XBP1), mRNA. [Source:RefSeq mRNA;Acc:NM_001006192]	55.3227	27.4056	56.9302	170.316	98.2361	144.362	46.5528	137.638	down	2.9566	-1.56394	0.033288	0.0505667	yes	GO:0002070(epithelial cell maturation),GO:0006355(regulation of transcription, DNA-dependent),GO:0031017(exocrine pancreas development),GO:0060691(epithelial cell maturation involved in salivary gland development),GO:1900103(positive regulation of endoplasmic reticulum unfolded protein response),GO:0005634(nucleus),GO:0003700(sequence-specific DNA binding transcription factor activity),GO:0043565…	04141(Protein processing in endoplasmic reticulum),04932(Non-alcoholic fatty liver disease (NAFLD)),05166(HTLV-I infection)
ENSGALT00000002382	chr12	637258	663481	-1	ENSGALG00000001567	NT5DC2	5'-nucleotidase domain containing 2 [Source:HGNC Symbol;Acc:25717]	56.7102	51.8768	69.0598	24.1627	20.4617	15.471	59.2156	20.0318	up	2.95608	1.56368	0.00691446	0.0472159	yes	GO:0046872(metal ion binding)	NA
ENSGALT00000011167	chr20	10878671	10881926	-1	ENSGALG00000006894	PLTP	Gallus gallus phospholipid transfer protein (PLTP), mRNA. [Source:RefSeq mRNA;Acc:NM_001162406]	5.72872	4.70366	6.32583	16.5602	20.7634	11.8106	5.58607	16.3781	down	2.93195	-1.55186	0.0487952	0.0496257	yes	GO:0010189(vitamin E biosynthetic process),GO:0030317(sperm motility),GO:0008289(lipid binding)	03320(PPAR signaling pathway)
ENSGALT00000023495	chr5	15118617	15140092	-1	ENSGALG00000014569	PNPLA2	Gallus gallus patatin-like phospholipase domain containing 2 (PNPLA2), mRNA. [Source:RefSeq mRNA;Acc:NM_001113291]	90.3663	116.202	112.812	58.4649	25.266	25.3564	106.46	36.3624	up	2.92775	1.54979	0.00869099	0.0494559	yes	GO:0006629(lipid metabolic process),GO:0008152(metabolic process),GO:0010891(negative regulation of sequestering of triglyceride),GO:0010898(positive regulation of triglyceride catabolic process),GO:0005829(cytosol),GO:0005811(lipid particle),GO:0004806(triglyceride lipase activity),GO:0016787(hydrolase activity),GO:0005515(protein binding)	00561(Glycerolipid metabolism)
ENSGALT00000002854	chr19	4152161	4154414	-1	ENSGALG00000001844	ALKBH4	alkB, alkylation repair homolog 4 (E. coli) [Source:HGNC Symbol;Acc:21900]	1.29429	2.55168	2.06969	6.64795	6.10686	4.54521	1.97188	5.76668	down	2.92445	-1.54817	0.0116037	0.0501195	yes	GO:0036090(cleavage furrow ingression),GO:0006482(protein demethylation),GO:0031032(actomyosin structure organization),GO:0070938(contractile ring),GO:0030496(midbody),GO:0005739(mitochondrion),GO:0003779(actin binding),GO:0016706(oxidoreductase activity, acting on paired donors, with incorporation or reduction of molecular oxygen, 2-oxoglutarate as one donor, and incorporation of one atom each o…	NA
ENSGALT00000045673	chr26	4693285	4699278	-1	ENSGALG00000023780	TREML2	Gallus gallus triggering receptor expressed on myeloid cells-like 2 (TREML2), transcript variant 2, mRNA. [Source:RefSeq mRNA;Acc:NM_001080868]	12.4817	5.27302	7.6242	22.649	20.9092	30.5029	8.45962	24.687	down	2.91822	-1.54509	0.0138209	0.0532771	yes	GO:0005515(protein binding)	NA
ENSGALT00000000147	chr16	150525	154473	1	ENSGALG00000000117	TRIM27.1	Gallus gallus tripartite motif containing 27 (TRIM27), mRNA. [Source:RefSeq mRNA;Acc:NM_001030671]	1.40286	0.531019	1.34598	2.22011	3.11489	4.21434	1.09329	3.18311	down	2.91151	-1.54177	0.0495407	0.0498886	yes	GO:0005622(intracellular),GO:0008270(zinc ion binding),GO:0046872(metal ion binding),GO:0005515(protein binding)	NA
ENSGALT00000009844	chr11	17837659	17843641	1	ENSGALG00000006099	ZFPM1	zinc finger protein, FOG family member 1 [Source:HGNC Symbol;Acc:19762]	0.01	1.01363	0.965151	2.2126	1.90267	1.64466	0.659595	1.91998	down	2.91084	-1.54144	0.0433587	0.0507148	yes	GO:0045403(negative regulation of interleukin-4 biosynthetic process),GO:0045078(positive regulation of interferon-gamma biosynthetic process),GO:0010724(regulation of definitive erythrocyte differentiation),GO:0030220(platelet formation),GO:0045944(positive regulation of transcription from RNA polymerase II promoter),GO:0030218(erythrocyte differentiation),GO:0032091(negative regulation of prote…	NA
ENSGALT00000000695	chr23	188096	199912	1	ENSGALG00000000509	AIM1L	absent in melanoma 1-like [Source:HGNC Symbol;Acc:17295]	0.915167	0.82995	0.588555	0.01	0.444504	0.357976	0.77789	0.267493	up	2.90807	1.54006	0.0433329	0.0508505	yes	()	NA
ENSGALT00000024824	chr3	67757131	67863760	-1	ENSGALG00000015388	BLIMP1	Uncharacterized protein [Source:UniProtKB/TrEMBL;Acc:F1NKI2]	8.68005	5.23646	8.79883	3.50647	2.57777	1.73839	7.57178	2.60754	up	2.9038	1.53794	0.0353701	0.0506195	yes	GO:0000122(negative regulation of transcription from RNA polymerase II promoter),GO:0045165(cell fate commitment),GO:0007281(germ cell development),GO:0042462(eye photoreceptor cell development),GO:0001701(in utero embryonic development),GO:0045579(positive regulation of B cell differentiation),GO:0001892(embryonic placenta development),GO:0001893(maternal placenta development),GO:0010628(positiv…	NA
ENSGALT00000004361	chr26	4221337	4235985	-1	ENSGALG00000002762	UHRF1BP1	UHRF1 binding protein 1 [Source:HGNC Symbol;Acc:21216]	4.15934	6.94274	6.48247	14.2426	20.6833	15.6791	5.86151	16.8683	down	2.87781	-1.52497	0.0174371	0.0543583	yes	GO:0042802(identical protein binding),GO:0042826(histone deacetylase binding),GO:0005515(protein binding)	NA
ENSGALT00000011431	chr10	16400550	16449273	1	ENSGALG00000007057	LRRC28	Gallus gallus leucine rich repeat containing 28 (LRRC28), mRNA. [Source:RefSeq mRNA;Acc:NM_001005822]	3.46088	3.36606	7.29881	17.4561	11.3133	11.873	4.70858	13.5474	down	2.87718	-1.52465	0.0255335	0.0512815	yes	GO:0005515(protein binding)	NA
ENSGALT00000005408	chr20	3189962	3615919	1	ENSGALG00000003488	PTPRT	protein tyrosine phosphatase, receptor type, T [Source:HGNC Symbol;Acc:9682]	0.527125	1.44659	2.8586	4.82961	5.47171	3.48598	1.61077	4.59577	down	2.85314	-1.51255	0.0299637	0.0515203	yes	GO:0006470(protein dephosphorylation),GO:0016311(dephosphorylation),GO:0035335(peptidyl-tyrosine dephosphorylation),GO:0007169(transmembrane receptor protein tyrosine kinase signaling pathway),GO:0007156(homophilic cell adhesion),GO:0016020(membrane),GO:0009986(cell surface),GO:0005886(plasma membrane),GO:0004721(phosphoprotein phosphatase activity),GO:0004725(protein tyrosine phosphatase activit…	NA
ENSGALT00000003802	chr6	3826268	3848731	-1	ENSGALG00000002414	TSPAN14	Gallus gallus tetraspanin 14 (TSPAN14), mRNA. [Source:RefSeq mRNA;Acc:NM_001031218]	61.3951	34.1759	46.5144	22.1846	11.6942	16.1671	47.3618	16.682	up	2.8391	1.50543	0.0456812	0.0501584	yes	GO:0016020(membrane),GO:0016021(integral to membrane)	NA
ENSGALT00000011467	chr6	21551707	21577502	1	ENSGALG00000007078	ENTPD1	ectonucleoside triphosphate diphosphohydrolase 1 [Source:RefSeq peptide;Acc:NP_001012925]	11.6426	8.48065	9.84136	23.6056	35.9705	25.2475	9.98822	28.2745	down	2.83079	-1.5012	0.0361812	0.0505691	yes	GO:0007186(G-protein coupled receptor signaling pathway),GO:0006200(ATP catabolic process),GO:0030168(platelet activation),GO:0009181(purine ribonucleoside diphosphate catabolic process),GO:0005605(basal lamina),GO:0016787(hydrolase activity),GO:0005515(protein binding),GO:0017111(nucleoside-triphosphatase activity),GO:0017110(nucleoside-diphosphatase activity)	00230(Purine metabolism),00240(Pyrimidine metabolism),05169(Epstein-Barr virus infection)
ENSGALT00000040637	chr24	5424232	5426628	1	ENSGALG00000024075	IL10R1	Gallus gallus interleukin 10 receptor, alpha (IL10RA), mRNA. [Source:RefSeq mRNA;Acc:NM_001039597]	16.8089	17.0249	20.8165	2.6251	8.89316	7.88994	18.2168	6.4694	up	2.81584	1.49356	0.0104597	0.0496662	yes	GO:0005515(protein binding)	04630(Jak-STAT signaling pathway),04060(Cytokine-cytokine receptor interaction),05152(Tuberculosis),05169(Epstein-Barr virus infection),05145(Toxoplasmosis)
ENSGALT00000015818	chr4	26355293	26387417	1	ENSGALG00000009719	PCDH10	Gallus gallus protocadherin 10 (PCDH10), mRNA. [Source:RefSeq mRNA;Acc:NM_214672]	0.677402	1.20194	2.94355	3.90255	5.42099	4.15712	1.60763	4.49355	down	2.79514	-1.48292	0.0309642	0.0511552	yes	GO:0007155(cell adhesion),GO:0007156(homophilic cell adhesion),GO:0005886(plasma membrane),GO:0016020(membrane),GO:0016021(integral to membrane),GO:0005509(calcium ion binding)	NA
ENSGALT00000005224	chr15	4941748	4948314	-1	ENSGALG00000003298	DDX55	Gallus gallus DEAD (Asp-Glu-Ala-Asp) box polypeptide 55 (DDX55), mRNA. [Source:RefSeq mRNA;Acc:NM_001006185]	7.06157	5.0761	4.47529	19.6812	10.9303	15.8083	5.53765	15.4733	down	2.7942	-1.48243	0.0488788	0.0495702	yes	GO:0000166(nucleotide binding),GO:0003676(nucleic acid binding),GO:0003723(RNA binding),GO:0004386(helicase activity),GO:0005524(ATP binding),GO:0008026(ATP-dependent helicase activity),GO:0016787(hydrolase activity),GO:0003677(DNA binding)	NA
ENSGALT00000044374	chr25	1511202	1516430	1	ENSGALG00000028249	MCL1	Gallus gallus myeloid cell leukemia sequence 1 (BCL2-related) (MCL1), nuclear gene encoding mitochondrial protein, mRNA. [Source:RefSeq mRNA;Acc:NM_001257283]	90.715	144.392	142.9	22.8941	64.5887	48.6291	126.003	45.3706	up	2.77718	1.47362	0.0244558	0.0512713	yes	GO:0042981(regulation of apoptotic process),GO:2001020(regulation of response to DNA damage stimulus),GO:2000811(negative regulation of anoikis),GO:0097194(execution phase of apoptosis),GO:0097192(extrinsic apoptotic signaling pathway in absence of ligand),GO:2001240(negative regulation of extrinsic apoptotic signaling pathway in absence of ligand),GO:0034097(response to cytokine),GO:0043066(nega…	04151(PI3K-Akt signaling pathway),05206(MicroRNAs in cancer)
ENSGALT00000019537	chr1	49616380	49630975	-1	ENSGALG00000011976	L3MBTL2	Gallus gallus l(3)mbt-like 2 (Drosophila) (L3MBTL2), mRNA. [Source:RefSeq mRNA;Acc:NM_001006238]	1.94002	3.92207	7.87214	15.6447	11.65	10.67	4.57808	12.6549	down	2.76424	-1.46688	0.0258655	0.0513728	yes	GO:0006355(regulation of transcription, DNA-dependent),GO:0005634(nucleus),GO:0008270(zinc ion binding),GO:0035064(methylated histone residue binding),GO:0042393(histone binding),GO:0005515(protein binding)	NA
ENSGALT00000040435	chr11	529483	535232	-1	ENSGALG00000001085	GPR56	G protein-coupled receptor 56 [Source:HGNC Symbol;Acc:4512]	20.3118	19.1306	19.4243	2.7931	9.09444	9.41424	19.6222	7.10059	up	2.76346	1.46648	0.025778	0.0513411	yes	GO:0001525(angiogenesis),GO:0007166(cell surface receptor signaling pathway),GO:0007186(G-protein coupled receptor signaling pathway),GO:0007218(neuropeptide signaling pathway),GO:0007266(Rho protein signal transduction),GO:0007420(brain development),GO:0008285(negative regulation of cell proliferation),GO:0010573(vascular endothelial growth factor production),GO:0045785(positive regulation of ce…	NA
ENSGALT00000023911	chrZ	22034805	22073103	-1	ENSGALG00000014810	PAPD4	PAP associated domain containing 4 [Source:HGNC Symbol;Acc:26776]	29.1866	26.146	34.9668	11.9328	9.33552	11.4909	30.0998	10.9197	up	2.75647	1.46282	0.0118809	0.050406	yes	GO:0071044(histone mRNA catabolic process),GO:0043631(RNA polyadenylation),GO:0005634(nucleus),GO:0016779(nucleotidyltransferase activity),GO:0004652(polynucleotide adenylyltransferase activity),GO:0005515(protein binding)	NA
ENSGALT00000028047	chr11	7252947	7266622	1	ENSGALG00000017363	C11H16ORF87	Gallus gallus chromosome 11 open reading frame, human C16orf87 (C11H16ORF87), mRNA. [Source:RefSeq mRNA;Acc:NM_001277573]	49.9529	29.0379	37.0123	17.8316	8.31858	16.0286	38.6677	14.0596	up	2.75027	1.45958	0.0383707	0.0498402	yes	GO:0005515(protein binding)	NA
ENSGALT00000005683	chr22	2614341	2660633	-1	ENSGALG00000003594	CHANK1	Uncharacterized protein [Source:UniProtKB/TrEMBL;Acc:F1NJR5]	2.01564	4.35391	4.9536	10.2558	11.7238	9.12301	3.77438	10.3675	down	2.74681	-1.45776	0.00533415	0.0466413	yes	GO:0007165(signal transduction),GO:0006888(ER to Golgi vesicle-mediated transport),GO:0072661(protein targeting to plasma membrane),GO:0048821(erythrocyte development),GO:0006779(porphyrin-containing compound biosynthetic process),GO:0015672(monovalent inorganic cation transport),GO:0014731(spectrin-associated cytoskeleton),GO:0005886(plasma membrane),GO:0016020(membrane),GO:0030863(cortical cyto…	05205(Proteoglycans in cancer)
ENSGALT00000023700	chrZ	16596458	16620194	-1	ENSGALG00000014700	DHX29	DEAH (Asp-Glu-Ala-His) box polypeptide 29 [Source:HGNC Symbol;Acc:15815]	3.09249	2.42897	4.10234	9.27293	8.30848	8.85147	3.20793	8.81096	down	2.74661	-1.45765	0.00164068	0.0435691	yes	GO:0005739(mitochondrion),GO:0016282(eukaryotic 43S preinitiation complex),GO:0000166(nucleotide binding),GO:0003676(nucleic acid binding),GO:0004386(helicase activity),GO:0005524(ATP binding),GO:0008026(ATP-dependent helicase activity),GO:0016787(hydrolase activity),GO:0043024(ribosomal small subunit binding)	NA
ENSGALT00000044315	chr10	19515261	19518020	1	ENSGALG00000027434	ZNF710	zinc finger protein 710 [Source:HGNC Symbol;Acc:25352]	3.94976	11.1547	9.88594	21.6925	28.708	17.6901	8.33015	22.6968	down	2.72466	-1.44608	0.0262232	0.0512317	yes	GO:0003676(nucleic acid binding),GO:0046872(metal ion binding)	NA
ENSGALT00000031308	chr2	2061655	2066620	-1	ENSGALG00000019702	HIGD1A	Gallus gallus HIG1 hypoxia inducible domain family, member 1A (HIGD1A), mRNA. [Source:RefSeq mRNA;Acc:NM_001030957]	31.6856	35.9297	25.372	5.46036	13.0398	15.8037	30.9958	11.4346	up	2.7107	1.43867	0.0108947	0.0497547	yes	GO:0043066(negative regulation of apoptotic process),GO:0016020(membrane),GO:0016021(integral to membrane),GO:0043234(protein complex)	NA
ENSGALT00000024748	chr1	84729831	84741575	-1	ENSGALG00000015334	ZBTB11	zinc finger and BTB domain containing 11 [Source:HGNC Symbol;Acc:16740]	4.32407	4.09192	4.6974	13.1309	10.8512	11.3324	4.37113	11.7715	down	2.69301	-1.42922	0.00601998	0.0469166	yes	GO:0005634(nucleus),GO:0003676(nucleic acid binding),GO:0046872(metal ion binding),GO:0005515(protein binding)	NA
ENSGALT00000036713	chr3	107083700	107086143	-1	ENSGALG00000022815	GAL1	Gallus gallus gallinacin 1 (GAL1), mRNA. [Source:RefSeq mRNA;Acc:NM_204993]	25.7854	35.8696	20.8675	78.6068	86.1663	57.2358	27.5075	74.003	down	2.69028	-1.42776	0.0177414	0.05413	yes	GO:0006952(defense response),GO:0031640(killing of cells of other organism),GO:0042742(defense response to bacterium),GO:0050832(defense response to fungus),GO:0005576(extracellular region)	NA
ENSGALT00000003547	chr9	2069219	2087633	-1	ENSGALG00000002263	KLHL6	Gallus gallus kelch-like 6 (Drosophila) (KLHL6), mRNA. [Source:RefSeq mRNA;Acc:NM_001031303]	7.49003	7.18118	9.29126	20.8502	24.2896	18.9357	7.98749	21.3585	down	2.67399	-1.419	0.00629094	0.0469855	yes	GO:0002467(germinal center formation),GO:0050853(B cell receptor signaling pathway),GO:0005515(protein binding)	NA
ENSGALT00000001398	chr26	61868	80894	-1	ENSGALG00000000947	FKBP51	Gallus gallus FK506 binding protein 5 (FKBP5), mRNA. [Source:RefSeq mRNA;Acc:NM_001005431]	351.039	325.507	487.883	203.484	144.376	91.9749	388.143	146.612	up	2.64742	1.40459	0.0215289	0.0525041	yes	GO:0000413(protein peptidyl-prolyl isomerization),GO:0006457(protein folding),GO:0018208(peptidyl-proline modification),GO:0061077(chaperone-mediated protein folding),GO:0005634(nucleus),GO:0016020(membrane),GO:0003755(peptidyl-prolyl cis-trans isomerase activity),GO:0005528(FK506 binding),GO:0031072(heat shock protein binding),GO:0005515(protein binding)	04915(Estrogen signaling pathway)
ENSGALT00000018287	chr1	194288921	194295617	1	ENSGALG00000011214	SERPINH1	Gallus gallus serpin peptidase inhibitor, clade H (heat shock protein 47), member 1, (collagen binding protein 1) (SERPINH1), mRNA. [Source:RefSeq mRNA;Acc:NM_205291]	78.2211	45.2761	82.3494	161.464	167.931	212.961	68.6155	180.785	down	2.63476	-1.39767	0.00651392	0.0471766	yes	GO:0006950(response to stress),GO:0010951(negative regulation of endopeptidase activity),GO:0030162(regulation of proteolysis),GO:0030199(collagen fibril organization),GO:0032964(collagen biosynthetic process),GO:0051604(protein maturation),GO:0005615(extracellular space),GO:0005737(cytoplasm),GO:0005783(endoplasmic reticulum),GO:0005788(endoplasmic reticulum lumen),GO:0005793(endoplasmic reticul…	NA
ENSGALT00000022610	chr3	37365304	37388562	1	ENSGALG00000013952	B3GALNT2	beta-1,3-N-acetylgalactosaminyltransferase 2 [Source:HGNC Symbol;Acc:28596]	1.98858	3.24092	4.33207	6.90142	8.70817	9.42642	3.18719	8.34534	down	2.6184	-1.38869	0.00718021	0.0468019	yes	GO:0006486(protein glycosylation),GO:0006493(protein O-linked glycosylation),GO:0005783(endoplasmic reticulum),GO:0005794(Golgi apparatus),GO:0016020(membrane),GO:0016021(integral to membrane),GO:0008378(galactosyltransferase activity),GO:0016740(transferase activity),GO:0016757(transferase activity, transferring glycosyl groups),GO:0008376(acetylgalactosaminyltransferase activity),GO:0008375(ace…	NA
ENSGALT00000007546	chr17	5128828	5138006	1	ENSGALG00000004738	GLE1	GLE1 RNA export mediator [Source:HGNC Symbol;Acc:4315]	1.3671	3.04021	4.33422	8.99568	7.89227	5.78961	2.91384	7.55919	down	2.59423	-1.37531	0.0221282	0.0518493	yes	GO:0016973(poly(A)+ mRNA export from nucleus),GO:0005643(nuclear pore)	NA
ENSGALT00000004070	chr21	3470173	3492933	1	ENSGALG00000002583	PIK3CD	Gallus gallus phosphoinositide-3-kinase, catalytic, delta polypeptide (PIK3CD), mRNA. [Source:RefSeq mRNA;Acc:NM_001012696]	10.6071	16.9923	17.1302	42.0605	37.7249	36.1245	14.9099	38.6366	down	2.59135	-1.3737	0.00122408	0.0487591	yes	GO:0016310(phosphorylation),GO:0036092(phosphatidylinositol-3-phosphate biosynthetic process),GO:0046854(phosphatidylinositol phosphorylation),GO:0048015(phosphatidylinositol-mediated signaling),GO:0007166(cell surface receptor signaling pathway),GO:0042113(B cell activation),GO:0001782(B cell homeostasis),GO:0005886(plasma membrane),GO:0005942(phosphatidylinositol 3-kinase complex),GO:0000166(nu…	00562(Inositol phosphate metabolism),04014(Ras signaling pathway),04012(ErbB signaling pathway),04370(VEGF signaling pathway),04630(Jak-STAT signaling pathway),04668(TNF signaling pathway),04066(HIF-1 signaling pathway),04070(Phosphatidylinositol signaling system),04151(PI3K-Akt signaling pathway),04150(mTOR signaling pathway),04810(Regulation of actin cytoskeleton),04210(Apoptosis),04510(Focal a…
ENSGALT00000026046	chr1	108646587	108699943	1	ENSGALG00000016164	ABCG1	ATP-binding cassette, sub-family G (WHITE), member 1 [Source:HGNC Symbol;Acc:73]	28.0957	48.7734	40.0309	22.2157	11.6441	11.3463	38.9667	15.0687	up	2.58593	1.37068	0.0366403	0.0500402	yes	GO:0006200(ATP catabolic process),GO:0006355(regulation of transcription, DNA-dependent),GO:0006810(transport),GO:0008203(cholesterol metabolic process),GO:0010033(response to organic substance),GO:0010872(regulation of cholesterol esterification),GO:0010875(positive regulation of cholesterol efflux),GO:0010888(negative regulation of lipid storage),GO:0030301(cholesterol transport),GO:0032367(int…	02010(ABC transporters)
ENSGALT00000024585	chr1	83400070	83404445	1	ENSGALG00000015235	IFNG	Gallus gallus Interferon-gamma level (IFNG), mRNA. [Source:RefSeq mRNA;Acc:NM_205046]	6.86901	3.25012	5.81515	17.5007	11.2146	12.3912	5.31143	13.7022	down	2.57975	-1.36723	0.0296901	0.0517951	yes	GO:0002690(positive regulation of leukocyte chemotaxis),GO:0002726(positive regulation of T cell cytokine production),GO:0006935(chemotaxis),GO:0006955(immune response),GO:0010820(positive regulation of T cell chemotaxis),GO:0035782(mature natural killer cell chemotaxis),GO:0051209(release of sequestered calcium ion into cytosol),GO:0071353(cellular response to interleukin-4),GO:0071560(cellular …	04060(Cytokine-cytokine receptor interaction),04062(Chemokine signaling pathway)
ENSGALT00000038899	chr1	26718046	26737692	1	ENSGALG00000009440	C1H7ORF60	Gallus gallus chromosome 1 open reading frame, human C7orf60 (C1H7ORF60), mRNA. [Source:RefSeq mRNA;Acc:NM_001030734]	20.5003	22.1279	16.48	8.53762	4.03029	10.4691	19.7027	7.67901	up	2.56579	1.3594	0.00945498	0.048423	yes	GO:0016433(rRNA (adenine) methyltransferase activity)	NA
ENSGALT00000040676	chr21	97066	113056	-1	ENSGALG00000000449	ARHGEF10L	Rho guanine nucleotide exchange factor (GEF) 10-like [Source:HGNC Symbol;Acc:25540]	7.31756	5.12941	3.47651	12.3028	17.7898	10.6436	5.30783	13.5788	down	2.55825	-1.35516	0.0424813	0.0507651	yes	GO:0035023(regulation of Rho protein signal transduction),GO:0005089(Rho guanyl-nucleotide exchange factor activity),GO:0005515(protein binding)	NA
ENSGALT00000005537	chr17	6723918	6741651	-1	ENSGALG00000003500	TSC1	tuberous sclerosis 1 [Source:HGNC Symbol;Acc:12362]	5.63253	7.99522	10.5499	23.2228	21.8236	16.627	8.0592	20.5578	down	2.55085	-1.35098	0.00929712	0.0486572	yes	GO:0001952(regulation of cell-matrix adhesion),GO:0006407(rRNA export from nucleus),GO:0006417(regulation of translation),GO:0007160(cell-matrix adhesion),GO:0008285(negative regulation of cell proliferation),GO:0017148(negative regulation of translation),GO:0032007(negative regulation of TOR signaling),GO:0032862(activation of Rho GTPase activity),GO:0032868(response to insulin),GO:0043666(regul…	04151(PI3K-Akt signaling pathway),04150(mTOR signaling pathway),04910(Insulin signaling pathway)
ENSGALT00000014608	chr3	8512199	8518246	1	ENSGALG00000008979	TRMT61B	tRNA methyltransferase 61 homolog B (S. cerevisiae) [Source:HGNC Symbol;Acc:26070]	8.71365	7.70335	6.02633	1.33697	3.30946	4.16187	7.48111	2.9361	up	2.54798	1.34935	0.0167466	0.0563723	yes	GO:0030488(tRNA methylation),GO:0051260(protein homooligomerization),GO:0070901(mitochondrial tRNA methylation),GO:0006464(cellular protein modification process),GO:0005739(mitochondrion),GO:0031515(tRNA (m1A) methyltransferase complex),GO:0016429(tRNA (adenine-N1-)-methyltransferase activity),GO:0004719(protein-L-isoaspartate (D-aspartate) O-methyltransferase activity),GO:0005515(protein binding)	NA
ENSGALT00000004295	chr26	4133855	4213476	-1	ENSGALG00000002723	ANKS1A	ankyrin repeat and sterile alpha motif domain containing 1A [Source:HGNC Symbol;Acc:20961]	3.12676	7.06099	6.10667	13.6137	16.6859	11.2077	5.43147	13.8357	down	2.54733	-1.34898	0.0155388	0.0546143	yes	GO:0006929(substrate-dependent cell migration),GO:0048013(ephrin receptor signaling pathway),GO:0016322(neuron remodeling),GO:0005737(cytoplasm),GO:0005634(nucleus),GO:0043005(neuron projection),GO:0005515(protein binding),GO:0046875(ephrin receptor binding)	NA
ENSGALT00000016422	chr4	32883598	32923376	-1	ENSGALG00000010097	PET112	PET112 homolog (yeast) [Source:HGNC Symbol;Acc:8849]	0.845909	3.80235	3.8228	9.51181	5.8695	6.17652	2.82369	7.18594	down	2.54488	-1.3476	0.0477215	0.0500971	yes	GO:0070681(glutaminyl-tRNAGln biosynthesis via transamidation),GO:0032543(mitochondrial translation),GO:0030956(glutamyl-tRNA(Gln) amidotransferase complex),GO:0005739(mitochondrion),GO:0016874(ligase activity),GO:0016884(carbon-nitrogen ligase activity, with glutamine as amido-N-donor),GO:0050567(glutaminyl-tRNA synthase (glutamine-hydrolyzing) activity)	00970(Aminoacyl-tRNA biosynthesis)
ENSGALT00000044471	chr6	15060198	15066917	-1	ENSGALG00000005086	PLAU	Gallus gallus plasminogen activator, urokinase (PLAU), mRNA. [Source:RefSeq mRNA;Acc:NM_205443]	9.03477	15.3597	23.446	38.3264	42.5705	40.6989	15.9468	40.532	down	2.5417	-1.34579	0.020599	0.052374	yes	GO:0001666(response to hypoxia),GO:0006508(proteolysis),GO:0014909(smooth muscle cell migration),GO:0042127(regulation of cell proliferation),GO:0042730(fibrinolysis),GO:2000097(regulation of smooth muscle cell-matrix adhesion),GO:0014910(regulation of smooth muscle cell migration),GO:0033628(regulation of cell adhesion mediated by integrin),GO:0010469(regulation of receptor activity),GO:0009986(…	04064(NF-kappa B signaling pathway),04610(Complement and coagulation cascades),05202(Transcriptional misregulation in cancers),05206(MicroRNAs in cancer),05205(Proteoglycans in cancer)
ENSGALT00000011141	chr4	8058003	8091302	-1	ENSGALG00000006877	KLHL4	kelch-like family member 4 [Source:HGNC Symbol;Acc:6355]	3.84025	5.58091	4.60568	13.3657	10.4682	11.8169	4.67561	11.8836	down	2.54162	-1.34575	0.003772	0.048295	yes	GO:0015630(microtubule cytoskeleton),GO:0005730(nucleolus),GO:0043231(intracellular membrane-bounded organelle),GO:0005634(nucleus),GO:0005515(protein binding)	NA
ENSGALT00000006783	chr28	4703154	4709520	-1	ENSGALG00000004266	TNFAIP8L1	Gallus gallus tumor necrosis factor, alpha-induced protein 8-like 1 (TNFAIP8L1), mRNA. [Source:RefSeq mRNA;Acc:NM_001006343]	10.1381	39.9999	41.6092	68.5073	76.4263	88.0106	30.5824	77.6481	down	2.53898	-1.34425	0.0256036	0.0511358	yes	()	NA
ENSGALT00000036826	chr1	96613960	96650360	-1	ENSGALG00000028863	novel gene	Uncharacterized protein [Source:UniProtKB/TrEMBL;Acc:F1NTM2]	2.89499	1.66331	1.38018	4.47815	5.39492	5.1767	1.9795	5.01659	down	2.53428	-1.34157	0.0089308	0.0481457	yes	GO:0005515(protein binding)	NA
ENSGALT00000008157	chr6	15060279	15068452	-1	ENSGALG00000005086	PLAU	Gallus gallus plasminogen activator, urokinase (PLAU), mRNA. [Source:RefSeq mRNA;Acc:NM_205443]	9.16325	16.2335	23.7794	38.8714	43.1759	42.5447	16.392	41.5307	down	2.53359	-1.34118	0.0192719	0.0535578	yes	GO:0001666(response to hypoxia),GO:0006508(proteolysis),GO:0014909(smooth muscle cell migration),GO:0042127(regulation of cell proliferation),GO:0042730(fibrinolysis),GO:2000097(regulation of smooth muscle cell-matrix adhesion),GO:0014910(regulation of smooth muscle cell migration),GO:0033628(regulation of cell adhesion mediated by integrin),GO:0010469(regulation of receptor activity),GO:0009986(…	04064(NF-kappa B signaling pathway),04610(Complement and coagulation cascades),05202(Transcriptional misregulation in cancers),05206(MicroRNAs in cancer),05205(Proteoglycans in cancer)
ENSGALT00000009729	chr20	9837210	9851741	1	ENSGALG00000006040	ZNF512B	Gallus gallus zinc finger protein 512B (ZNF512B), mRNA. [Source:RefSeq mRNA;Acc:NM_001270577]	2.07755	2.94902	5.95827	7.78699	11.8207	8.20779	3.66161	9.27183	down	2.53217	-1.34037	0.0323746	0.0503527	yes	GO:0008152(metabolic process),GO:0016310(phosphorylation),GO:0044206(UMP salvage),GO:0044211(CTP salvage),GO:0005783(endoplasmic reticulum),GO:0000166(nucleotide binding),GO:0004849(uridine kinase activity),GO:0005524(ATP binding),GO:0016301(kinase activity),GO:0016740(transferase activity),GO:0016773(phosphotransferase activity, alcohol group as acceptor),GO:0005515(protein binding)	00240(Pyrimidine metabolism),00983(Drug metabolism - other enzymes)
ENSGALT00000010014	chr12	10449680	10473797	1	ENSGALG00000006204	CHST13	carbohydrate (chondroitin 4) sulfotransferase 13 [Source:HGNC Symbol;Acc:21755]	11.045	9.89517	6.94897	2.94088	5.67874	2.39863	9.29638	3.67275	up	2.53118	1.33981	0.0252519	0.0512906	yes	GO:0016051(carbohydrate biosynthetic process),GO:0030206(chondroitin sulfate biosynthetic process),GO:0016021(integral to membrane),GO:0008146(sulfotransferase activity),GO:0047756(chondroitin 4-sulfotransferase activity),GO:0001537(N-acetylgalactosamine 4-O-sulfotransferase activity)	00532(Glycosaminoglycan biosynthesis - chondroitin sulfate / dermatan sulfate)
ENSGALT00000009766	chr13	13446391	13454101	1	ENSGALG00000006057	CLK4	CDC-like kinase 4 [Source:HGNC Symbol;Acc:13659]	14.6319	6.53234	6.64519	30.075	16.7682	23.2628	9.2698	23.3686	down	2.52094	-1.33396	0.0457174	0.0500448	yes	GO:0006468(protein phosphorylation),GO:0018108(peptidyl-tyrosine phosphorylation),GO:0043484(regulation of RNA splicing),GO:0046777(protein autophosphorylation),GO:0005634(nucleus),GO:0000166(nucleotide binding),GO:0004672(protein kinase activity),GO:0004674(protein serine/threonine kinase activity),GO:0004713(protein tyrosine kinase activity),GO:0005524(ATP binding),GO:0016772(transferase activi…	NA
ENSGALT00000006798	chr7	6156611	6186495	1	ENSGALG00000004274	CDERMO-1	Gallus gallus twist homolog 2 (Drosophila) (TWIST2), mRNA. [Source:RefSeq mRNA;Acc:NM_204679]	2.49764	4.13622	0.833521	7.07318	5.26843	6.46107	2.48913	6.26756	down	2.51798	-1.33226	0.0379725	0.0497739	yes	GO:0045668(negative regulation of osteoblast differentiation),GO:0006357(regulation of transcription from RNA polymerase II promoter),GO:0000122(negative regulation of transcription from RNA polymerase II promoter),GO:0008285(negative regulation of cell proliferation),GO:0048701(embryonic cranial skeleton morphogenesis),GO:0032720(negative regulation of tumor necrosis factor production),GO:000636…	05205(Proteoglycans in cancer)
ENSGALT00000014990	chr4	19316594	19349626	1	ENSGALG00000009207	TRIM2	Gallus gallus tripartite motif containing 2 (TRIM2), mRNA. [Source:RefSeq mRNA;Acc:NM_001257314]	6.24903	8.39512	4.74811	20.4481	15.0521	13.2694	6.46409	16.2566	down	2.5149	-1.3305	0.0282881	0.0510895	yes	GO:0016567(protein ubiquitination),GO:0043523(regulation of neuron apoptotic process),GO:0005622(intracellular),GO:0005737(cytoplasm),GO:0004842(ubiquitin-protein ligase activity),GO:0008270(zinc ion binding),GO:0046872(metal ion binding),GO:0005515(protein binding)	NA
ENSGALT00000000862	chr21	317578	475591	-1	ENSGALG00000000610	CAMTA1	calmodulin binding transcription activator 1 [Source:HGNC Symbol;Acc:18806]	0.848138	1.70554	2.58719	4.9009	4.32545	3.64933	1.71362	4.29189	down	2.50457	-1.32457	0.0171312	0.0555794	yes	GO:0005634(nucleus),GO:0005737(cytoplasm),GO:0003677(DNA binding),GO:0005515(protein binding)	NA
ENSGALT00000007174	chr19	6575681	6578835	-1	ENSGALG00000004503	CENPV	centromere protein V [Source:HGNC Symbol;Acc:29920]	18.6979	16.45	11.2124	7.54365	5.51392	5.48541	15.4534	6.18099	up	2.50016	1.32202	0.042792	0.0507978	yes	GO:0001667(ameboidal cell migration),GO:0008152(metabolic process),GO:0031508(centromeric heterochromatin assembly),GO:0032467(positive regulation of cytokinesis),GO:0033044(regulation of chromosome organization),GO:0034508(centromere complex assembly),GO:0000776(kinetochore),GO:0005634(nucleus),GO:0005737(cytoplasm),GO:0015630(microtubule cytoskeleton),GO:0051233(spindle midzone),GO:0016846(carb…	NA
ENSGALT00000020339	chr7	32812269	32916777	-1	ENSGALG00000012440	ZEB2	zinc finger E-box binding homeobox 2 [Source:HGNC Symbol;Acc:14881]	59.0548	42.4331	39.1294	124.744	131.658	94.5768	46.8724	116.993	down	2.49598	-1.31961	0.0115266	0.0503939	yes	GO:0006355(regulation of transcription, DNA-dependent),GO:0007417(central nervous system development),GO:0001756(somitogenesis),GO:0001843(neural tube closure),GO:0001755(neural crest cell migration),GO:0048598(embryonic morphogenesis),GO:0021766(hippocampus development),GO:0043507(positive regulation of JUN kinase activity),GO:0021846(cell proliferation in forebrain),GO:0030177(positive regulati…	05206(MicroRNAs in cancer)
ENSGALT00000005039	chr13	9397204	9420637	1	ENSGALG00000003177	BRD8	bromodomain containing 8 [Source:HGNC Symbol;Acc:19874]	4.20049	10.6662	11.4188	20.7589	23.8608	20.7099	8.76183	21.7765	down	2.48538	-1.31347	0.0166949	0.056731	yes	GO:0043968(histone H2A acetylation),GO:0043967(histone H4 acetylation),GO:0035267(NuA4 histone acetyltransferase complex),GO:0005739(mitochondrion),GO:0005634(nucleus),GO:0005515(protein binding)	NA
ENSGALT00000003801	chr6	3827026	3865512	-1	ENSGALG00000002414	TSPAN14	Gallus gallus tetraspanin 14 (TSPAN14), mRNA. [Source:RefSeq mRNA;Acc:NM_001031218]	35.0103	29.5925	36.4408	17.5532	9.81137	13.4021	33.6812	13.5889	up	2.47858	1.30952	0.0028255	0.044041	yes	GO:0016020(membrane),GO:0016021(integral to membrane)	NA
ENSGALT00000016309	chr4	32207746	32286859	1	ENSGALG00000010040	DCLK2	doublecortin-like kinase 2 [Source:HGNC Symbol;Acc:19002]	0.994625	1.81828	1.37675	4.33052	3.31267	2.71632	1.39655	3.45317	down	2.47264	-1.30605	0.0307822	0.0510899	yes	GO:0006468(protein phosphorylation),GO:0016310(phosphorylation),GO:0035556(intracellular signal transduction),GO:0000166(nucleotide binding),GO:0004672(protein kinase activity),GO:0004674(protein serine/threonine kinase activity),GO:0005524(ATP binding),GO:0016301(kinase activity),GO:0016740(transferase activity),GO:0016772(transferase activity, transferring phosphorus-containing groups),GO:00047…	NA
ENSGALT00000027169	chr1	136801888	136830896	1	ENSGALG00000016828	GRTP1	growth hormone regulated TBC protein 1 [Source:HGNC Symbol;Acc:20310]	43.6949	36.3973	33.0453	18.9608	8.4383	18.4383	37.7125	15.2791	up	2.46824	1.30348	0.00863902	0.049953	yes	GO:0032313(regulation of Rab GTPase activity),GO:0032851(positive regulation of Rab GTPase activity),GO:0005097(Rab GTPase activator activity)	NA
ENSGALT00000014246	chr3	11203131	11209021	-1	ENSGALG00000008757	CNRIP1	Gallus gallus cannabinoid receptor interacting protein 1 (CNRIP1), mRNA. [Source:RefSeq mRNA;Acc:NM_001277530]	13.8863	7.96027	13.5906	35.4771	21.4199	30.3899	11.8124	29.0956	down	2.46315	-1.3005	0.0350298	0.0508429	yes	()	NA
ENSGALT00000011741	chr9	13337288	13367409	-1	ENSGALG00000007253	IL1RAP	interleukin 1 receptor accessory protein [Source:HGNC Symbol;Acc:5995]	49.6335	80.1773	85.2456	38.1112	19.8025	29.6882	71.6855	29.2006	up	2.45493	1.29568	0.0440541	0.0500583	yes	GO:0019221(cytokine-mediated signaling pathway),GO:0042094(interleukin-2 biosynthetic process),GO:0004908(interleukin-1 receptor activity),GO:0005515(protein binding),GO:0004871(signal transducer activity)	04060(Cytokine-cytokine receptor interaction),04210(Apoptosis)
ENSGALT00000025391	chr2	120668873	120684840	-1	ENSGALG00000015744	TPD52	Gallus gallus tumor protein D52 (TPD52), mRNA. [Source:RefSeq mRNA;Acc:NM_001079754]	14.7574	24.0102	22.6804	5.28332	12.0002	7.75068	20.4827	8.34474	up	2.45456	1.29547	0.0311927	0.0511788	yes	GO:0005737(cytoplasm),GO:0005783(endoplasmic reticulum),GO:0048471(perinuclear region of cytoplasm),GO:0005509(calcium ion binding),GO:0042802(identical protein binding),GO:0042803(protein homodimerization activity),GO:0046982(protein heterodimerization activity),GO:0030183(B cell differentiation),GO:0005515(protein binding)	NA
ENSGALT00000041024	chr6	8687539	8689635	1	ENSGALG00000024288	novel gene	Uncharacterized protein [Source:UniProtKB/TrEMBL;Acc:E1BRH5]	1.23971	4.32599	4.4604	7.61529	10.4944	6.46563	3.34203	8.19176	down	2.45113	-1.29345	0.0391785	0.0497185	yes	()	NA
ENSGALT00000019224	chr7	27374149	27415070	-1	ENSGALG00000011778	ITGB5	Gallus gallus integrin, beta 5 (ITGB5), mRNA. [Source:RefSeq mRNA;Acc:NM_204483]	4.05857	13.8024	10.5815	24.438	25.1103	20.0384	9.48084	23.1956	down	2.44657	-1.29076	0.0229556	0.0507998	yes	GO:0007155(cell adhesion),GO:0007229(integrin-mediated signaling pathway),GO:0007275(multicellular organismal development),GO:0008305(integrin complex),GO:0016020(membrane),GO:0016021(integral to membrane),GO:0005925(focal adhesion),GO:0031252(cell leading edge),GO:0004872(receptor activity),GO:0005515(protein binding),GO:0005178(integrin binding)	04151(PI3K-Akt signaling pathway),04512(ECM-receptor interaction),04145(Phagosome),04810(Regulation of actin cytoskeleton),04510(Focal adhesion),05205(Proteoglycans in cancer),05410(Hypertrophic cardiomyopathy (HCM)),05412(Arrhythmogenic right ventricular cardiomyopathy (ARVC)),05414(Dilated cardiomyopathy (DCM))
ENSGALT00000004014	chr6	4248637	4262880	-1	ENSGALG00000002543	CSGALNACT2	chondroitin sulfate N-acetylgalactosaminyltransferase 2 [Source:HGNC Symbol;Acc:24292]	33.6687	35.9644	33.325	18.1858	11.1003	12.8984	34.3194	14.0615	up	2.44066	1.28727	0.00521387	0.0461524	yes	GO:0030166(proteoglycan biosynthetic process),GO:0050650(chondroitin sulfate proteoglycan biosynthetic process),GO:0050651(dermatan sulfate proteoglycan biosynthetic process),GO:0032580(Golgi cisterna membrane),GO:0008376(acetylgalactosaminyltransferase activity),GO:0016758(transferase activity, transferring hexosyl groups)	00532(Glycosaminoglycan biosynthesis - chondroitin sulfate / dermatan sulfate)
ENSGALT00000015817	chr6	31636707	31661235	-1	ENSGALG00000009718	FAM53B	family with sequence similarity 53, member B [Source:HGNC Symbol;Acc:28968]	7.32811	7.64855	3.95605	17.2342	18.1855	10.7014	6.3109	15.3737	down	2.43605	-1.28454	0.0422558	0.0507495	yes	()	NA
ENSGALT00000007127	chr12	3118857	3124115	-1	ENSGALG00000004476	SEMA3G	sema domain, immunoglobulin domain (Ig), short basic domain, secreted, (semaphorin) 3G [Source:HGNC Symbol;Acc:30400]	3.49464	9.36992	9.03838	13.6806	22.0497	17.4971	7.30098	17.7425	down	2.43015	-1.28105	0.0298826	0.0516284	yes	GO:0007275(multicellular organismal development),GO:0016020(membrane),GO:0004872(receptor activity),GO:0005515(protein binding)	04360(Axon guidance)
ENSGALT00000043968	chr2	107730232	107760331	1	ENSGALG00000028133	UBE2V2	Gallus gallus ubiquitin-conjugating enzyme E2 variant 2 (UBE2V2), mRNA. [Source:RefSeq mRNA;Acc:NM_001031018]	19.2699	11.9334	13.4763	6.37295	3.46068	8.57218	14.8932	6.13527	up	2.42748	1.27946	0.0378877	0.0498449	yes	GO:0000729(DNA double-strand break processing),GO:0005634(nucleus),GO:0031372(UBC13-MMS2 complex),GO:0016881(acid-amino acid ligase activity),GO:0005515(protein binding)	NA
ENSGALT00000025940	chr8	23384593	23390722	1	ENSGALG00000016099	novel gene	Uncharacterized protein [Source:UniProtKB/TrEMBL;Acc:E1BRW6]	10.4815	7.43911	9.59501	23.2809	23.4346	19.619	9.17189	22.1115	down	2.41079	-1.26951	0.00163119	0.0467826	yes	()	NA
ENSGALT00000024449	chr1	82675889	82696983	-1	ENSGALG00000015152	BOC	BOC cell adhesion associated, oncogene regulated [Source:HGNC Symbol;Acc:17173]	7.69288	4.10551	2.38818	9.16434	10.3529	14.6492	4.72886	11.3888	down	2.40837	-1.26805	0.0436439	0.0503907	yes	GO:0007224(smoothened signaling pathway),GO:0007411(axon guidance),GO:0030030(cell projection organization),GO:0045663(positive regulation of myoblast differentiation),GO:0043025(neuronal cell body),GO:0030424(axon),GO:0030426(growth cone),GO:0005515(protein binding)	NA
ENSGALT00000021001	chr1	57464358	57469579	-1	ENSGALG00000012874	KIAA1147	KIAA1147 [Source:HGNC Symbol;Acc:29472]	13.3841	6.11441	14.1506	30.9452	23.185	26.8145	11.2164	26.9816	down	2.40555	-1.26637	0.0102014	0.0497578	yes	()	NA
ENSGALT00000008750	chr19	8554204	8576278	1	ENSGALG00000005452	TADA2A	transcriptional adapter 2-alpha [Source:RefSeq peptide;Acc:NP_001012825]	4.37868	2.96644	5.27218	10.9413	11.4348	7.84756	4.20577	10.0746	down	2.39542	-1.26028	0.0171777	0.0552307	yes	GO:0001932(regulation of protein phosphorylation),GO:0007067(mitosis),GO:0031063(regulation of histone deacetylation),GO:0031647(regulation of protein stability),GO:0043966(histone H3 acetylation),GO:0090043(regulation of tubulin deacetylation),GO:0000125(PCAF complex),GO:0005634(nucleus),GO:0005671(Ada2/Gcn5/Ada3 transcription activator complex),GO:0072686(mitotic spindle),GO:0003677(DNA binding…	NA
ENSGALT00000012430	chr20	12026081	12069868	1	ENSGALG00000007668	BMP7	bone morphogenetic protein 7 [Source:HGNC Symbol;Acc:1074]	2.5205	1.10315	1.41944	3.93635	4.82696	3.28639	1.68103	4.01657	down	2.38935	-1.25662	0.0196674	0.0530132	yes	GO:0001654(eye development),GO:0001656(metanephros development),GO:0001657(ureteric bud development),GO:0001707(mesoderm formation),GO:0001822(kidney development),GO:0001823(mesonephros development),GO:0007389(pattern specification process),GO:0007411(axon guidance),GO:0007435(salivary gland morphogenesis),GO:0008285(negative regulation of cell proliferation),GO:0009880(embryonic pattern specific…	04350(TGF-beta signaling pathway),04390(Hippo signaling pathway),04060(Cytokine-cytokine receptor interaction)
ENSGALT00000005330	chr28	3666228	3700318	1	ENSGALG00000003371	ELL	Gallus gallus elongation factor RNA polymerase II (ELL), mRNA. [Source:RefSeq mRNA;Acc:NM_001012847]	25.4817	23.0771	27.6808	8.30727	12.7047	10.9206	25.4132	10.6442	up	2.38752	1.25551	0.00132523	0.0500099	yes	GO:0006368(transcription elongation from RNA polymerase II promoter),GO:0010923(negative regulation of phosphatase activity),GO:0001701(in utero embryonic development),GO:0008023(transcription elongation factor complex),GO:0016607(nuclear speck),GO:0019902(phosphatase binding),GO:0005515(protein binding)	NA
ENSGALT00000024673	chr3	66547545	66556746	1	ENSGALG00000015286	SESN1	sestrin 1 [Source:HGNC Symbol;Acc:21595]	158.759	126.642	133.168	68.3825	59.4405	48.1249	139.523	58.6493	up	2.37894	1.25032	0.00434059	0.0471546	yes	GO:0007050(cell cycle arrest),GO:0005634(nucleus)	04115(p53 signaling pathway)
ENSGALT00000016159	chr27	3147717	3159497	1	ENSGALG00000009939	SPOP	speckle-type POZ protein [Source:HGNC Symbol;Acc:11254]	4.28167	15.2956	20.1831	31.0269	27.5701	35.5061	13.2534	31.3677	down	2.36676	-1.24291	0.0427201	0.050881	yes	GO:0043161(proteasome-mediated ubiquitin-dependent protein catabolic process),GO:0005634(nucleus),GO:0031463(Cul3-RING ubiquitin ligase complex),GO:0031625(ubiquitin protein ligase binding),GO:0005515(protein binding)	NA
ENSGALT00000008454	chr2	1886499	1900914	-1	ENSGALG00000005268	SEC22C	SEC22 vesicle trafficking protein homolog C (S. cerevisiae) [Source:HGNC Symbol;Acc:16828]	1.28181	3.71479	3.40879	7.54028	7.07079	5.2479	2.8018	6.61966	down	2.36265	-1.2404	0.0214365	0.0524573	yes	GO:0006810(transport),GO:0016020(membrane)	NA
ENSGALT00000025291	chr1	97445928	97480511	-1	ENSGALG00000015679	SAMSN1	Gallus gallus SAM domain, SH3 domain and nuclear localization signals 1 (SAMSN1), mRNA. [Source:RefSeq mRNA;Acc:NM_001006256]	26.999	20.3632	28.8788	9.6103	6.85303	15.8383	25.4136	10.7672	up	2.36028	1.23896	0.016814	0.0563348	yes	GO:0002820(negative regulation of adaptive immune response),GO:0050732(negative regulation of peptidyl-tyrosine phosphorylation),GO:0050869(negative regulation of B cell activation),GO:0005634(nucleus),GO:0005829(cytosol),GO:0005515(protein binding)	NA
ENSGALT00000032821	chrZ	35881518	35899231	1	ENSGALG00000015148	ANXA1	Gallus gallus annexin A1 (ANXA1), mRNA. [Source:RefSeq mRNA;Acc:NM_206906]	63.5617	55.3794	47.613	20.4937	31.489	18.6426	55.5181	23.5418	up	2.35828	1.23773	0.00668804	0.047013	yes	GO:0001780(neutrophil homeostasis),GO:0007049(cell cycle),GO:0007165(signal transduction),GO:0018149(peptide cross-linking),GO:0030216(keratinocyte differentiation),GO:0031340(positive regulation of vesicle fusion),GO:0033031(positive regulation of neutrophil apoptotic process),GO:0042127(regulation of cell proliferation),GO:0046632(alpha-beta T cell differentiation),GO:0050482(arachidonic acid s…	NA
ENSGALT00000039674	chr6	20638839	20730717	-1	ENSGALG00000006973	BLNK	Gallus gallus B-cell linker (BLNK), mRNA. [Source:RefSeq mRNA;Acc:NM_204908]	2.10328	6.65527	10.2545	15.4384	17.8776	11.4083	6.33768	14.9081	down	2.3523	-1.23407	0.0496179	0.0497567	yes	GO:0042113(B cell activation),GO:0005737(cytoplasm),GO:0005829(cytosol),GO:0005886(plasma membrane),GO:0016020(membrane),GO:0005515(protein binding),GO:0035556(intracellular signal transduction)	04064(NF-kappa B signaling pathway),04662(B cell receptor signaling pathway),04380(Osteoclast differentiation),05340(Primary immunodeficiency)
ENSGALT00000012795	chr24	6167375	6171382	-1	ENSGALG00000007878	SDHD	Gallus gallus succinate dehydrogenase complex, subunit D, integral membrane protein (SDHD), nuclear gene encoding mitochondrial protein, mRNA. [Source:RefSeq mRNA;Acc:NM_001006321]	130.152	103.948	96.5715	51.493	41.0066	48.3708	110.224	46.9568	up	2.34734	1.23103	0.0179802	0.0534929	yes	GO:0005740(mitochondrial envelope),GO:0016021(integral to membrane),GO:0005739(mitochondrion)	01200(Carbon metabolism),00020(Citrate cycle (TCA cycle)),00190(Oxidative phosphorylation),05010(Alzheimer's disease),05012(Parkinson's disease),05016(Huntington's disease),04932(Non-alcoholic fatty liver disease (NAFLD))
ENSGALT00000018228	chr3	40114801	40162988	-1	ENSGALG00000011180	FAM120B	family with sequence similarity 120B [Source:HGNC Symbol;Acc:21109]	3.17632	3.84565	5.84565	12.2166	8.86766	9.08205	4.28921	10.0554	down	2.34436	-1.22919	0.0152838	0.0539827	yes	GO:0005634(nucleus)	NA
ENSGALT00000044250	chr5	1003403	1011083	1	ENSGALG00000028400	GCHFR	Gallus gallus GTP cyclohydrolase I feedback regulator (GCHFR), mRNA. [Source:RefSeq mRNA;Acc:NM_001199522]	2.89226	7.64074	6.73638	14.6549	12.8438	12.9223	5.75646	13.4737	down	2.34062	-1.22689	0.0216218	0.052198	yes	GO:0009890(negative regulation of biosynthetic process),GO:0042470(melanosome),GO:0030425(dendrite),GO:0031965(nuclear membrane),GO:0005737(cytoplasm),GO:0005634(nucleus),GO:0005515(protein binding)	NA
ENSGALT00000026377	chr1	117766586	117785247	1	ENSGALG00000016351	ACOT9	Gallus gallus acyl-CoA thioesterase 9 (ACOT9), nuclear gene encoding mitochondrial protein, mRNA. [Source:RefSeq mRNA;Acc:NM_001012823]	30.1856	19.617	19.4949	13.9343	5.85447	10.0529	23.0992	9.94723	up	2.32217	1.21548	0.0440327	0.0501931	yes	()	NA
ENSGALT00000020002	chr1	50734154	50753991	1	ENSGALG00000012247	DDX17	DEAD (Asp-Glu-Ala-Asp) box helicase 17 [Source:HGNC Symbol;Acc:2740]	59.0969	30.6424	80.0247	152.771	122.634	118.219	56.588	131.208	down	2.31865	-1.21329	0.0164185	0.0563257	yes	GO:0009791(post-embryonic development),GO:0072358(cardiovascular system development),GO:0000166(nucleotide binding),GO:0003676(nucleic acid binding),GO:0004386(helicase activity),GO:0005524(ATP binding),GO:0008026(ATP-dependent helicase activity),GO:0016787(hydrolase activity)	NA
ENSGALT00000040027	chr14	7680158	7703987	-1	ENSGALG00000006698	ABCC6	Gallus gallus ATP-binding cassette, sub-family C (CFTR/MRP), member 6 (ABCC6), mRNA. [Source:RefSeq mRNA;Acc:NM_001252080]	3.23094	1.29943	1.41519	5.65137	3.91576	4.21271	1.98185	4.59328	down	2.31767	-1.21268	0.0349545	0.0508365	yes	GO:0006200(ATP catabolic process),GO:0006810(transport),GO:0055085(transmembrane transport),GO:0016021(integral to membrane),GO:0000166(nucleotide binding),GO:0005215(transporter activity),GO:0005524(ATP binding),GO:0016887(ATPase activity),GO:0017111(nucleoside-triphosphatase activity),GO:0042626(ATPase activity, coupled to transmembrane movement of substances)	02010(ABC transporters)
ENSGALT00000008968	chr19	9024293	9027844	1	ENSGALG00000005588	EVI2A	Gallus gallus ecotropic viral integration site 2A (EVI2A), mRNA. [Source:RefSeq mRNA;Acc:NM_001080893]	74.9884	58.6866	61.3065	32.0663	20.2554	31.9164	64.9938	28.0794	up	2.31465	1.21079	0.00537101	0.0463978	yes	GO:0016021(integral to membrane)	NA
ENSGALT00000021134	chr1	59846668	59987218	1	ENSGALG00000012956	TMTC1	transmembrane and tetratricopeptide repeat containing 1 [Source:HGNC Symbol;Acc:24099]	16.2177	11.0633	19.6718	30.9506	31.2024	46.1017	15.6509	36.0849	down	2.30561	-1.20515	0.0367267	0.0500628	yes	GO:0005739(mitochondrion),GO:0005515(protein binding)	NA
ENSGALT00000025747	chr4	87924322	87944779	-1	ENSGALG00000015977	SMOX	spermine oxidase [Source:HGNC Symbol;Acc:15862]	66.6434	42.8559	46.8818	16.0219	27.1565	24.7411	52.127	22.6398	up	2.30245	1.20317	0.0396799	0.0499131	yes	GO:0055114(oxidation-reduction process),GO:0006598(polyamine catabolic process),GO:0046208(spermine catabolic process),GO:0005737(cytoplasm),GO:0016491(oxidoreductase activity),GO:0046592(polyamine oxidase activity)	NA
ENSGALT00000043822	chr11	1029318	1036713	-1	ENSGALG00000028928	LCAT	lecithin-cholesterol acyltransferase [Source:HGNC Symbol;Acc:6522]	25.2611	25.8564	22.9394	50.0252	59.7619	60.4967	24.6856	56.7613	down	2.29936	-1.20123	0.0075901	0.0485902	yes	GO:0006629(lipid metabolic process),GO:0034372(very-low-density lipoprotein particle remodeling),GO:0034435(cholesterol esterification),GO:0034375(high-density lipoprotein particle remodeling),GO:0006656(phosphatidylcholine biosynthetic process),GO:0043691(reverse cholesterol transport),GO:0006644(phospholipid metabolic process),GO:0042632(cholesterol homeostasis),GO:0030301(cholesterol transport…	00564(Glycerophospholipid metabolism)
ENSGALT00000031785	chr3	51748192	51757550	1	ENSGALG00000019976	ADAT2	adenosine deaminase, tRNA-specific 2 [Source:HGNC Symbol;Acc:21172]	3.92693	4.64513	10.8526	17.1719	13.8964	13.3125	6.4749	14.7936	down	2.28476	-1.19204	0.0430043	0.050714	yes	GO:0008152(metabolic process),GO:0003824(catalytic activity),GO:0008270(zinc ion binding),GO:0016787(hydrolase activity)	NA
ENSGALT00000036908	chr1	84610640	84660808	-1	ENSGALG00000015322	IMPG2	Gallus gallus interphotoreceptor matrix proteoglycan 2 (IMPG2), mRNA. [Source:RefSeq mRNA;Acc:NM_001044639]	6.1817	7.60974	4.43627	3.75258	2.09376	2.153	6.0759	2.66645	up	2.27865	1.18818	0.0442336	0.0500244	yes	GO:0005515(protein binding),GO:0008201(heparin binding),GO:0005540(hyaluronic acid binding)	NA
ENSGALT00000011551	chr10	16932375	16967360	1	ENSGALG00000007129	ALDH6	Gallus gallus aldehyde dehydrogenase 1 family, member A3 (ALDH1A3), mRNA. [Source:RefSeq mRNA;Acc:NM_204669]	22.1583	27.8723	32.4024	16.2374	8.03193	11.9355	27.4777	12.0683	up	2.27685	1.18704	0.0168622	0.0562333	yes	GO:0002072(optic cup morphogenesis involved in camera-type eye development),GO:0002138(retinoic acid biosynthetic process),GO:0008152(metabolic process),GO:0021768(nucleus accumbens development),GO:0031076(embryonic camera-type eye development),GO:0042573(retinoic acid metabolic process),GO:0042574(retinal metabolic process),GO:0043065(positive regulation of apoptotic process),GO:0048048(embryoni…	00010(Glycolysis / Gluconeogenesis),00340(Histidine metabolism),00350(Tyrosine metabolism),00360(Phenylalanine metabolism),00410(beta-Alanine metabolism),00980(Metabolism of xenobiotics by cytochrome P450),00982(Drug metabolism - cytochrome P450),05204(Chemical carcinogenesis)
ENSGALT00000004896	chr18	5995687	6004315	1	ENSGALG00000003099	PCTP	phosphatidylcholine transfer protein [Source:HGNC Symbol;Acc:8752]	5.65859	4.0743	5.02889	1.94675	1.84366	2.72025	4.9206	2.17022	up	2.26733	1.18099	0.0115843	0.0503389	yes	GO:0015914(phospholipid transport),GO:0008203(cholesterol metabolic process),GO:0008289(lipid binding),GO:0031210(phosphatidylcholine binding)	NA
ENSGALT00000027595	chr1	174496738	174524653	1	ENSGALG00000017083	KATNAL1	katanin p60 subunit A-like 1 [Source:HGNC Symbol;Acc:28361]	2.03131	1.92225	2.5421	5.21677	5.7318	3.77859	2.16522	4.90905	down	2.26723	-1.18093	0.0324339	0.050227	yes	GO:0006281(DNA repair),GO:0006310(DNA recombination),GO:0007283(spermatogenesis),GO:0051013(microtubule severing),GO:0005874(microtubule),GO:0000166(nucleotide binding),GO:0005524(ATP binding),GO:0017111(nucleoside-triphosphatase activity),GO:0009378(four-way junction helicase activity),GO:0008568(microtubule-severing ATPase activity)	NA
ENSGALT00000027083	chr1	132731877	132781402	-1	ENSGALG00000016776	TBC1D8	TBC1 domain family, member 8 (with GRAM domain) [Source:HGNC Symbol;Acc:17791]	14.9684	8.13425	9.39711	27.4657	21.8006	24.1158	10.8333	24.4607	down	2.25792	-1.175	0.00804416	0.0492962	yes	GO:0032313(regulation of Rab GTPase activity),GO:0032851(positive regulation of Rab GTPase activity),GO:0005097(Rab GTPase activator activity),GO:0005509(calcium ion binding)	NA
ENSGALT00000007212	chr11	8709893	8772492	-1	ENSGALG00000004528	TSHZ3	teashirt zinc finger homeobox 3 [Source:HGNC Symbol;Acc:30700]	9.73263	6.07261	3.65846	15.7677	11.7847	16.3883	6.4879	14.6469	down	2.25757	-1.17477	0.0247673	0.0511762	yes	GO:0006355(regulation of transcription, DNA-dependent),GO:0010468(regulation of gene expression),GO:0045892(negative regulation of transcription, DNA-dependent),GO:0001656(metanephros development),GO:0001701(in utero embryonic development),GO:0030324(lung development),GO:0002087(regulation of respiratory gaseous exchange by neurological system process),GO:0001657(ureteric bud development),GO:0048…	04391(Hippo signaling pathway -fly)
ENSGALT00000018725	chr2	40982492	41010218	1	ENSGALG00000011488	CMTM7	Gallus gallus CKLF-like MARVEL transmembrane domain containing 7 (CMTM7), mRNA. [Source:RefSeq mRNA;Acc:NM_001007894]	50.662	57.7255	63.7516	33.5547	19.9905	22.8253	57.3797	25.4568	up	2.254	1.17249	0.00479363	0.0464464	yes	GO:0016020(membrane),GO:0016021(integral to membrane)	NA
ENSGALT00000028002	chr1	194466868	194469256	1	ENSGALG00000017328	P2RY2	purinergic receptor P2Y, G-protein coupled, 2 [Source:HGNC Symbol;Acc:8541]	2.56555	6.06955	6.52841	12.3941	10.2537	11.5073	5.0545	11.385	down	2.25245	-1.1715	0.0211805	0.0523668	yes	GO:0007165(signal transduction),GO:0007186(G-protein coupled receptor signaling pathway),GO:0007200(phospholipase C-activating G-protein coupled receptor signaling pathway),GO:0035589(G-protein coupled purinergic nucleotide receptor signaling pathway),GO:0042312(regulation of vasodilation),GO:0070257(positive regulation of mucus secretion),GO:0016021(integral to membrane),GO:0004871(signal transd…	04080(Neuroactive ligand-receptor interaction)
ENSGALT00000023996	chr3	61222961	61230461	-1	ENSGALG00000014873	GJA1	Gallus gallus gap junction protein, alpha 1, 43kDa (GJA1), mRNA. [Source:RefSeq mRNA;Acc:NM_204586]	119.214	103.078	114.721	205.258	293.8	259.878	112.338	252.979	down	2.25194	-1.17117	0.0285549	0.0511847	yes	GO:0001649(osteoblast differentiation),GO:0001701(in utero embryonic development),GO:0001764(neuron migration),GO:0001947(heart looping),GO:0002070(epithelial cell maturation),GO:0002088(lens development in camera-type eye),GO:0003294(atrial ventricular junction remodeling),GO:0006915(apoptotic process),GO:0007154(cell communication),GO:0007165(signal transduction),GO:0007267(cell-cell signaling)…	04540(Gap junction),05412(Arrhythmogenic right ventricular cardiomyopathy (ARVC))
ENSGALT00000000287	chr26	935843	958649	1	ENSGALG00000000217	PPFIA4	protein tyrosine phosphatase, receptor type, f polypeptide (PTPRF), interacting protein (liprin), alpha 4 [Source:HGNC Symbol;Acc:9248]	0.760287	0.509625	0.449305	1.21375	1.40677	1.24244	0.573072	1.28766	down	2.24693	-1.16796	0.00550166	0.0464081	yes	GO:0005515(protein binding)	NA
ENSGALT00000011296	chr6	20638215	20680433	-1	ENSGALG00000006973	BLNK	Gallus gallus B-cell linker (BLNK), mRNA. [Source:RefSeq mRNA;Acc:NM_204908]	4.889	6.43691	10.9067	20.6264	16.6372	12.6383	7.41087	16.634	down	2.24454	-1.16642	0.0373006	0.0498966	yes	GO:0042113(B cell activation),GO:0005737(cytoplasm),GO:0005829(cytosol),GO:0005886(plasma membrane),GO:0016020(membrane),GO:0005515(protein binding),GO:0035556(intracellular signal transduction)	04064(NF-kappa B signaling pathway),04662(B cell receptor signaling pathway),04380(Osteoclast differentiation),05340(Primary immunodeficiency)
ENSGALT00000026313	chr2	138436990	138444511	1	ENSGALG00000016311	TRIB1	tribbles pseudokinase 1 [Source:HGNC Symbol;Acc:16891]	20.6234	27.4088	18.2184	9.59932	13.4682	6.5169	22.0835	9.86146	up	2.23938	1.1631	0.0267208	0.0509543	yes	GO:0006468(protein phosphorylation),GO:0006469(negative regulation of protein kinase activity),GO:0007254(JNK cascade),GO:0014912(negative regulation of smooth muscle cell migration),GO:0031665(negative regulation of lipopolysaccharide-mediated signaling pathway),GO:0032436(positive regulation of proteasomal ubiquitin-dependent protein catabolic process),GO:0032496(response to lipopolysaccharide)…	NA
ENSGALT00000019223	chr8	4241111	4268884	1	ENSGALG00000011777	PDE4DIP	phosphodiesterase 4D interacting protein [Source:HGNC Symbol;Acc:15580]	0.642881	1.8758	1.69848	2.49887	3.54878	3.39017	1.40572	3.14594	down	2.23796	-1.16218	0.0272251	0.0507024	yes	GO:0005737(cytoplasm),GO:0005634(nucleus),GO:0005488(binding),GO:0005515(protein binding)	NA
ENSGALT00000025690	chr1	104632521	104642675	1	ENSGALG00000015941	IL10R2	interleukin-10 receptor subunit beta precursor [Source:RefSeq peptide;Acc:NP_990188]	65.1663	88.6474	65.3274	40.709	20.5737	36.6637	73.0471	32.6488	up	2.23736	1.1618	0.0169718	0.0560774	yes	GO:0005515(protein binding)	04630(Jak-STAT signaling pathway),04060(Cytokine-cytokine receptor interaction),05152(Tuberculosis),05169(Epstein-Barr virus infection),05145(Toxoplasmosis)
ENSGALT00000039200	chr1	18948099	18951794	-1	ENSGALG00000023576	PIM3	pim-3 oncogene [Source:HGNC Symbol;Acc:19310]	48.7137	37.3771	36.9624	14.8043	21.0479	19.3089	41.0178	18.3871	up	2.2308	1.15756	0.0145068	0.0536154	yes	GO:0006468(protein phosphorylation),GO:0007346(regulation of mitotic cell cycle),GO:0043066(negative regulation of apoptotic process),GO:0061179(negative regulation of insulin secretion involved in cellular response to glucose stimulus),GO:0000166(nucleotide binding),GO:0004672(protein kinase activity),GO:0004674(protein serine/threonine kinase activity),GO:0005524(ATP binding),GO:0016772(transfe…	NA
ENSGALT00000011172	chr15	8980618	9000207	1	ENSGALG00000006898	EIF4ENIF1	eukaryotic translation initiation factor 4E nuclear import factor 1 [Source:HGNC Symbol;Acc:16687]	2.78694	6.39939	7.0097	11.9479	11.0566	13.0817	5.39868	12.0288	down	2.22809	-1.15581	0.0231244	0.0507039	yes	GO:0043231(intracellular membrane-bounded organelle),GO:0005634(nucleus),GO:0005829(cytosol),GO:0005515(protein binding)	NA
ENSGALT00000022007	chr22	2840728	2865827	-1	ENSGALG00000013515	SLC4A5	solute carrier family 4 (sodium bicarbonate cotransporter), member 5 [Source:HGNC Symbol;Acc:18168]	0.408159	0.418434	0.22702	0.679932	0.981792	0.681196	0.351205	0.780974	down	2.2237	-1.15296	0.0299426	0.0516078	yes	GO:0006810(transport),GO:0006820(anion transport),GO:0016020(membrane),GO:0016021(integral to membrane),GO:0005215(transporter activity),GO:0005452(inorganic anion exchanger activity),GO:0008509(anion transmembrane transporter activity)	NA
ENSGALT00000003081	chr28	4717570	4726716	-1	ENSGALG00000001978	MED16	mediator complex subunit 16 [Source:HGNC Symbol;Acc:17556]	3.47228	7.82179	7.58874	12.7003	17.766	11.4956	6.29427	13.9873	down	2.22223	-1.15201	0.0362572	0.0502832	yes	GO:0006367(transcription initiation from RNA polymerase II promoter),GO:0030518(intracellular steroid hormone receptor signaling pathway),GO:0030521(androgen receptor signaling pathway),GO:0045893(positive regulation of transcription, DNA-dependent),GO:0016592(mediator complex),GO:0003712(transcription cofactor activity),GO:0004872(receptor activity),GO:0030375(thyroid hormone receptor coactivato…	NA
ENSGALT00000045767	chr1	51283694	51289313	1	ENSGALG00000027067	C1QTNF6	C1q and TNF related 6 [Source:HGNC Symbol;Acc:HGNC:14343]	22.9907	20.9663	15.4843	41.9898	44.1323	45.7923	19.8138	43.9715	down	2.21924	-1.15006	0.00265761	0.0423446	yes	GO:0051259(protein oligomerization),GO:0070208(protein heterotrimerization),GO:0005576(extracellular region),GO:0005581(collagen),GO:0005615(extracellular space),GO:0005515(protein binding),GO:0042802(identical protein binding)	NA
ENSGALT00000017362	chr5	42992444	43039778	1	ENSGALG00000010672	KCNK13	potassium channel, subfamily K, member 13 [Source:HGNC Symbol;Acc:6275]	2.2129	2.09409	0.923117	4.37754	3.07092	4.15485	1.74337	3.86777	down	2.21856	-1.14962	0.0211153	0.0525684	yes	GO:0006810(transport),GO:0006811(ion transport),GO:0071805(potassium ion transmembrane transport),GO:0016020(membrane),GO:0016021(integral to membrane),GO:0005267(potassium channel activity)	NA
ENSGALT00000008104	chr1	132936573	133084109	1	ENSGALG00000016781	MAP4K4	mitogen-activated protein kinase kinase kinase kinase 4 [Source:HGNC Symbol;Acc:6866]	14.7362	6.08005	9.27007	27.2977	21.5298	17.9044	10.0288	22.244	down	2.21801	-1.14927	0.0307771	0.0512	yes	GO:0006468(protein phosphorylation),GO:0046328(regulation of JNK cascade),GO:0035556(intracellular signal transduction),GO:0019028(viral capsid),GO:0005737(cytoplasm),GO:0004672(protein kinase activity),GO:0004674(protein serine/threonine kinase activity),GO:0005083(small GTPase regulator activity),GO:0005524(ATP binding),GO:0016772(transferase activity, transferring phosphorus-containing groups)…	04010(MAPK signaling pathway)
ENSGALT00000027389	chr1	165018166	165029891	1	ENSGALG00000016945	LECT1	Gallus gallus leukocyte cell derived chemotaxin 1 (LECT1), mRNA. [Source:RefSeq mRNA;Acc:NM_204810]	2.99717	3.85555	3.1257	5.69495	7.69468	8.73417	3.32614	7.3746	down	2.21717	-1.14872	0.0362095	0.0505102	yes	GO:0001886(endothelial cell morphogenesis),GO:0001937(negative regulation of endothelial cell proliferation),GO:0016525(negative regulation of angiogenesis),GO:0030948(negative regulation of vascular endothelial growth factor receptor signaling pathway)	NA
ENSGALT00000009711	chr4	3370855	3382816	1	ENSGALG00000006032	IL13RA1	interleukin 13 receptor, alpha 1 [Source:HGNC Symbol;Acc:5974]	7.8355	5.51103	3.88699	12.5236	13.1659	12.4806	5.74451	12.7234	down	2.21488	-1.14723	0.0225808	0.0515618	yes	GO:0019221(cytokine-mediated signaling pathway),GO:0016020(membrane),GO:0004896(cytokine receptor activity),GO:0005515(protein binding)	04630(Jak-STAT signaling pathway),04060(Cytokine-cytokine receptor interaction)
ENSGALT00000006629	chr4	1273808	1298422	-1	ENSGALG00000004169	novel gene	Uncharacterized protein [Source:UniProtKB/TrEMBL;Acc:E1BU38]	19.1778	11.157	13.6001	40.4424	28.3799	28.4696	14.645	32.4306	down	2.21445	-1.14695	0.0273999	0.0506333	yes	GO:0005515(protein binding)	NA
ENSGALT00000008873	chr4	2271063	2292421	1	ENSGALG00000005533	ZMYM3	zinc finger, MYM-type 3 [Source:HGNC Symbol;Acc:13054]	3.43625	3.88406	3.7827	9.02368	8.95439	6.58121	3.701	8.18643	down	2.21195	-1.14532	0.0277457	0.0506201	yes	GO:0022604(regulation of cell morphogenesis),GO:0007010(cytoskeleton organization),GO:0008270(zinc ion binding)	NA
ENSGALT00000040639	chr24	5424260	5428001	1	ENSGALG00000024075	IL10R1	Gallus gallus interleukin 10 receptor, alpha (IL10RA), mRNA. [Source:RefSeq mRNA;Acc:NM_001039597]	20.7033	17.3748	21.6366	5.44556	13.3069	8.25173	19.9049	9.00139	up	2.21132	1.1449	0.023392	0.0506708	yes	GO:0005515(protein binding)	04630(Jak-STAT signaling pathway),04060(Cytokine-cytokine receptor interaction),05152(Tuberculosis),05169(Epstein-Barr virus infection),05145(Toxoplasmosis)
ENSGALT00000012879	chr24	6190723	6217912	-1	ENSGALG00000007929	DIXDC1	DIX domain containing 1 [Source:HGNC Symbol;Acc:23695]	2.36894	1.72802	2.14112	5.42615	3.56142	4.7979	2.07936	4.59516	down	2.20989	-1.14397	0.0333312	0.0503125	yes	GO:0007049(cell cycle),GO:0007165(signal transduction),GO:0007275(multicellular organismal development),GO:0021795(cerebral cortex cell migration),GO:0021799(cerebral cortex radially oriented cell migration),GO:0021846(cell proliferation in forebrain),GO:0021869(forebrain ventricular zone progenitor cell division),GO:0030177(positive regulation of Wnt signaling pathway),GO:0032956(regulation of a…	NA
ENSGALT00000016130	chr1	35074941	35098051	-1	ENSGALG00000009905	MDM1	Mdm1 nuclear protein homolog (mouse) [Source:HGNC Symbol;Acc:29917]	2.28205	6.4786	7.00992	13.9966	10.1916	10.5386	5.25686	11.5756	down	2.202	-1.13882	0.0324052	0.0502911	yes	GO:0060041(retina development in camera-type eye)	NA
ENSGALT00000006628	chr28	4632406	4634454	-1	ENSGALG00000004168	FEM1A	fem-1 homolog a (C. elegans) [Source:HGNC Symbol;Acc:16934]	13.1794	29.1205	30.3936	55.3013	57.008	47.6745	24.2312	53.328	down	2.2008	-1.13803	0.0185722	0.0536947	yes	GO:0050728(negative regulation of inflammatory response),GO:0031867(EP4 subtype prostaglandin E2 receptor binding),GO:0005515(protein binding)	NA
ENSGALT00000011588	chr15	9278527	9280569	-1	ENSGALG00000007153	novel gene	Gallus gallus dynein, light chain, LC8-type 1 (LOC427708), mRNA. [Source:RefSeq mRNA;Acc:NM_001277879]	52.4307	86.3508	74.3076	191.48	132.274	145.069	71.0297	156.274	down	2.20013	-1.13759	0.0236314	0.050882	yes	GO:0007017(microtubule-based process),GO:0005875(microtubule associated complex)	04962(Vasopressin-regulated water reabsorption)
ENSGALT00000007089	chr21	5491938	5499769	-1	ENSGALG00000023653	MIIP	migration and invasion inhibitory protein [Source:HGNC Symbol;Acc:25715]	3.43563	1.55491	1.46434	5.28778	4.80922	4.09786	2.15163	4.73162	down	2.19909	-1.1369	0.0371137	0.0502085	yes	()	NA
ENSGALT00000006272	chr13	11334536	11351905	1	ENSGALG00000003937	GEMIN5	gem (nuclear organelle) associated protein 5 [Source:HGNC Symbol;Acc:20043]	6.66474	4.7302	8.0858	13.693	15.1374	14.0081	6.49358	14.2795	down	2.19902	-1.13686	0.00682626	0.0470618	yes	GO:0016604(nuclear body),GO:0005654(nucleoplasm),GO:0005737(cytoplasm),GO:0005634(nucleus),GO:0005515(protein binding),GO:0017069(snRNA binding)	03013(RNA transport)
ENSGALT00000003546	chr9	2069219	2087633	-1	ENSGALG00000002263	KLHL6	Gallus gallus kelch-like 6 (Drosophila) (KLHL6), mRNA. [Source:RefSeq mRNA;Acc:NM_001031303]	6.947	7.54988	8.19581	13.7425	20.5466	15.5117	7.56423	16.6003	down	2.19458	-1.13394	0.0435825	0.0507284	yes	GO:0002467(germinal center formation),GO:0050853(B cell receptor signaling pathway),GO:0005515(protein binding)	NA
ENSGALT00000007513	chr4	48270	56854	-1	ENSGALG00000004716	ZC4H2	zinc finger, C4H2 domain containing [Source:HGNC Symbol;Acc:24931]	2.53177	5.39066	8.31709	12.1255	13.5267	9.96928	5.41317	11.8738	down	2.1935	-1.13324	0.0394925	0.0499403	yes	GO:0007399(nervous system development),GO:0005634(nucleus),GO:0005737(cytoplasm),GO:0045211(postsynaptic membrane)	NA
ENSGALT00000021583	chr1	66735234	66851127	1	ENSGALG00000013211	ST8SIA1	Gallus gallus ST8 alpha-N-acetyl-neuraminide alpha-2,8-sialyltransferase 1 (ST8SIA1), mRNA. [Source:RefSeq mRNA;Acc:NM_205008]	20.0138	18.9394	13.0451	40.6332	35.4118	37.9252	17.3328	37.9901	down	2.19181	-1.13212	0.00227053	0.0387611	yes	GO:0006486(protein glycosylation),GO:0097503(sialylation),GO:0008284(positive regulation of cell proliferation),GO:0034605(cellular response to heat),GO:0005794(Golgi apparatus),GO:0016020(membrane),GO:0016021(integral to membrane),GO:0030173(integral to Golgi membrane),GO:0008373(sialyltransferase activity),GO:0016740(transferase activity),GO:0016757(transferase activity, transferring glycosyl g…	00601(Glycosphingolipid biosynthesis - lacto and neolacto series),00603(Glycosphingolipid biosynthesis - globo series),00604(Glycosphingolipid biosynthesis - ganglio series)
ENSGALT00000005353	chrZ	10426982	10441296	1	ENSGALG00000003387	DNAJC21	DnaJ (Hsp40) homolog, subfamily C, member 21 [Source:HGNC Symbol;Acc:27030]	2.73054	4.00512	4.27146	7.84646	9.09426	7.09203	3.66904	8.01092	down	2.18338	-1.12656	0.00507256	0.0466285	yes	GO:0003676(nucleic acid binding),GO:0008270(zinc ion binding),GO:0046872(metal ion binding),GO:0005515(protein binding)	NA
ENSGALT00000036635	chr1	117759376	117761976	-1	ENSGALG00000016348	SAT1	Gallus gallus spermidine/spermine N1-acetyltransferase 1 (SAT1), mRNA. [Source:RefSeq mRNA;Acc:NM_204186]	186.593	244.798	249.37	106.49	123.455	82.1132	226.921	104.02	up	2.18152	1.12533	0.0110661	0.0492818	yes	GO:0001525(angiogenesis),GO:0042127(regulation of cell proliferation),GO:0009447(putrescine catabolic process),GO:0005622(intracellular),GO:0005737(cytoplasm),GO:0008080(N-acetyltransferase activity),GO:0004145(diamine N-acetyltransferase activity),GO:0016740(transferase activity),GO:0016746(transferase activity, transferring acyl groups),GO:0005515(protein binding)	00330(Arginine and proline metabolism)
ENSGALT00000042750	chr3	4225368	4229779	1	ENSGALG00000028056	RRP36	ribosomal RNA processing 36 homolog (S. cerevisiae) [Source:HGNC Symbol;Acc:21374]	4.90427	3.56361	4.457	11.7441	7.48643	8.93404	4.3083	9.38818	down	2.17909	-1.12373	0.0450508	0.0501575	yes	GO:0006364(rRNA processing),GO:0042254(ribosome biogenesis),GO:0042274(ribosomal small subunit biogenesis),GO:0005634(nucleus),GO:0005730(nucleolus)	NA
ENSGALT00000037814	chr4	50471434	50669744	-1	ENSGALG00000011680	EPHA5	Gallus gallus EPH receptor A5 (EPHA5), mRNA. [Source:RefSeq mRNA;Acc:NM_205105]	5.072	5.41681	3.65732	9.83728	9.9345	11.0195	4.71538	10.2638	down	2.17666	-1.12211	0.00171901	0.0385166	yes	GO:0006468(protein phosphorylation),GO:0007169(transmembrane receptor protein tyrosine kinase signaling pathway),GO:0016310(phosphorylation),GO:0018108(peptidyl-tyrosine phosphorylation),GO:0048013(ephrin receptor signaling pathway),GO:0016020(membrane),GO:0016021(integral to membrane),GO:0000166(nucleotide binding),GO:0004672(protein kinase activity),GO:0004713(protein tyrosine kinase activity),…	04360(Axon guidance)
ENSGALT00000022653	chr3	55492475	55523798	1	ENSGALG00000013980	SLC2A12	solute carrier family 2 (facilitated glucose transporter), member 12 [Source:HGNC Symbol;Acc:18067]	4.55104	3.34707	2.53819	9.43549	6.12344	7.15169	3.47877	7.57021	down	2.17612	-1.12176	0.0322421	0.050365	yes	GO:0006810(transport),GO:0055085(transmembrane transport),GO:0015758(glucose transport),GO:0016020(membrane),GO:0016021(integral to membrane),GO:0005215(transporter activity),GO:0022857(transmembrane transporter activity),GO:0022891(substrate-specific transmembrane transporter activity)	NA
ENSGALT00000017992	chr4	45164032	45214295	-1	ENSGALG00000011045	AFF1	AF4/FMR2 family, member 1 [Source:HGNC Symbol;Acc:7135]	35.3004	27.1417	31.671	14.431	13.5797	15.2566	31.371	14.4224	up	2.17516	1.12112	0.0157514	0.0550916	yes	GO:0045893(positive regulation of transcription, DNA-dependent),GO:0005634(nucleus),GO:0005515(protein binding)	05202(Transcriptional misregulation in cancers)
ENSGALT00000026449	chr2	136546690	136654781	-1	ENSGALG00000016399	SNTB1	Gallus gallus syntrophin, beta 1 (dystrophin-associated protein A1, 59kDa, basic component 1) (SNTB1), mRNA. [Source:RefSeq mRNA;Acc:NM_001005798]	48.2355	37.778	32.2211	25.2161	13.282	15.9151	39.4115	18.1377	up	2.1729	1.11962	0.0255463	0.051164	yes	GO:0043234(protein complex),GO:0045202(synapse),GO:0005543(phospholipid binding),GO:0005515(protein binding)	NA
ENSGALT00000030790	chr2	141260434	141266499	-1	ENSGALG00000019426	TMEM71	transmembrane protein 71 [Source:HGNC Symbol;Acc:26572]	3.70829	4.73743	5.10486	11.7372	7.41044	10.2891	4.51686	9.81224	down	2.17236	-1.11926	0.0420993	0.0506463	yes	()	NA
ENSGALT00000001690	chr28	2427355	2452090	-1	ENSGALG00000001121	SH3GL1	Gallus gallus SH3-domain GRB2-like 1 (SH3GL1), mRNA. [Source:RefSeq mRNA;Acc:NM_204529]	9.50595	15.4725	22.4444	39.7471	33.1377	30.1037	15.8076	34.3295	down	2.17171	-1.11883	0.0193147	0.0534697	yes	GO:0006897(endocytosis),GO:0002102(podosome),GO:0005737(cytoplasm),GO:0005768(endosome),GO:0016020(membrane),GO:0030054(cell junction),GO:0031901(early endosome membrane),GO:0042995(cell projection),GO:0008289(lipid binding),GO:0005515(protein binding),GO:0042802(identical protein binding)	04144(Endocytosis)
ENSGALT00000039668	chr17	5404390	5430983	1	ENSGALG00000004548	NUP188	Gallus gallus nucleoporin 188kDa (NUP188), mRNA. [Source:RefSeq mRNA;Acc:NM_001030690]	13.1333	11.8967	14.6336	31.4497	27.722	26.8757	13.2212	28.6825	down	2.16943	-1.11732	0.00195434	0.0389239	yes	()	03013(RNA transport)
ENSGALT00000017033	chr5	38509975	38515589	1	ENSGALG00000010463	AHSA1	AHA1, activator of heat shock 90kDa protein ATPase homolog 1 (yeast) [Source:HGNC Symbol;Acc:1189]	14.4301	24.6284	32.1043	47.0751	47.4882	59.5983	23.7209	51.3872	down	2.16632	-1.11525	0.0149252	0.0537758	yes	GO:0006950(response to stress),GO:0032781(positive regulation of ATPase activity),GO:0005737(cytoplasm),GO:0001671(ATPase activator activity),GO:0051087(chaperone binding),GO:0005515(protein binding)	NA
ENSGALT00000039933	chr3	4121558	4135789	1	ENSGALG00000008508	PYGB	Gallus gallus phosphorylase, glycogen; brain (PYGB), mRNA. [Source:RefSeq mRNA;Acc:NM_001031034]	25.8955	17.7287	17.8632	47.7771	50.15	34.8733	20.4958	44.2668	down	2.1598	-1.1109	0.0199579	0.0526097	yes	GO:0005975(carbohydrate metabolic process),GO:0005737(cytoplasm),GO:0004645(phosphorylase activity),GO:0008184(glycogen phosphorylase activity),GO:0016740(transferase activity),GO:0016757(transferase activity, transferring glycosyl groups),GO:0030170(pyridoxal phosphate binding)	00500(Starch and sucrose metabolism),04910(Insulin signaling pathway)
ENSGALT00000013049	chr18	11155143	11164638	1	ENSGALG00000008041	TSEN54	TSEN54 tRNA splicing endonuclease subunit [Source:HGNC Symbol;Acc:27561]	7.97573	5.74842	7.81483	15.8355	17.5032	13.1369	7.17966	15.4919	down	2.15775	-1.10953	0.0093659	0.0483119	yes	GO:0006388(tRNA splicing, via endonucleolytic cleavage and ligation)	NA
ENSGALT00000021065	chr2	69248910	69317872	1	ENSGALG00000012916	DROSHA	Gallus gallus drosha, ribonuclease type III (DROSHA), mRNA. [Source:RefSeq mRNA;Acc:NM_001006379]	4.19031	5.54613	5.62196	12.8289	9.17835	10.9272	5.11947	10.9781	down	2.14439	-1.10057	0.0180915	0.0533809	yes	GO:0006396(RNA processing),GO:0010468(regulation of gene expression),GO:0010586(miRNA metabolic process),GO:0016075(rRNA catabolic process),GO:0031054(pre-miRNA processing),GO:0003723(RNA binding),GO:0004521(endoribonuclease activity),GO:0004525(ribonuclease III activity),GO:0005515(protein binding)	03008(Ribosome biogenesis in eukaryotes),05205(Proteoglycans in cancer)
ENSGALT00000045335	chr5	12238929	12267404	1	ENSGALG00000006382	PTPRJ	Gallus gallus protein tyrosine phosphatase, receptor type, J (PTPRJ), mRNA. [Source:RefSeq mRNA;Acc:NM_204621]	46.5138	34.4938	33.1236	23.4404	13.7119	16.1416	38.0437	17.7646	up	2.14154	1.09865	0.021541	0.0521787	yes	GO:0006470(protein dephosphorylation),GO:0016311(dephosphorylation),GO:0035335(peptidyl-tyrosine dephosphorylation),GO:0004721(phosphoprotein phosphatase activity),GO:0004725(protein tyrosine phosphatase activity),GO:0016787(hydrolase activity),GO:0016791(phosphatase activity),GO:0005515(protein binding),GO:0050918(positive chemotaxis),GO:0042059(negative regulation of epidermal growth factor rec…	04520(Adherens junction)
ENSGALT00000004276	chr6	4731815	4761989	1	ENSGALG00000002710	IPMK	inositol polyphosphate multikinase [Source:HGNC Symbol;Acc:20739]	84.7853	87.8747	100.884	59.0179	29.8071	39.1658	91.1815	42.6636	up	2.13722	1.09573	0.0142208	0.0533839	yes	GO:0001841(neural tube formation),GO:0032958(inositol phosphate biosynthetic process),GO:0005634(nucleus),GO:0000824(inositol tetrakisphosphate 3-kinase activity),GO:0008440(inositol-1,4,5-trisphosphate 3-kinase activity)	00562(Inositol phosphate metabolism)
ENSGALT00000000748	chr26	467889	481411	1	ENSGALG00000000541	ZC3H11A	Gallus gallus zinc finger CCCH-type containing 11A (ZC3H11A), mRNA. [Source:RefSeq mRNA;Acc:NM_001031030]	16.9567	12.3731	16.3203	33.6926	33.2843	30.026	15.2167	32.3343	down	2.12492	-1.08741	0.000914941	0.0468581	yes	GO:0016973(poly(A)+ mRNA export from nucleus),GO:0000346(transcription export complex),GO:0046872(metal ion binding),GO:0005515(protein binding)	NA
ENSGALT00000036491	chr1	166904655	166927469	-1	ENSGALG00000016972	NUFIP1	Gallus gallus nuclear fragile X mental retardation protein interacting protein 1 (NUFIP1), mRNA. [Source:RefSeq mRNA;Acc:NM_001030825]	11.7528	10.3041	9.01237	3.02314	4.60513	6.99499	10.3564	4.87442	up	2.12465	1.08722	0.0218057	0.0519425	yes	GO:0000492(box C/D snoRNP assembly),GO:0045944(positive regulation of transcription from RNA polymerase II promoter),GO:0005634(nucleus),GO:0005726(perichromatin fibrils),GO:0005730(nucleolus),GO:0008023(transcription elongation factor complex),GO:0016363(nuclear matrix),GO:0022626(cytosolic ribosome),GO:0048786(presynaptic active zone),GO:0070761(pre-snoRNP complex),GO:0003723(RNA binding),GO:00…	NA
ENSGALT00000036630	chr2	124823184	124932746	-1	ENSGALG00000015926	RUNX1T1	Gallus gallus runt-related transcription factor 1; translocated to, 1 (cyclin D-related) (RUNX1T1), mRNA. [Source:RefSeq mRNA;Acc:NM_204744]	3.31031	2.47644	1.81011	5.25366	5.53744	5.32875	2.53229	5.37328	down	2.12191	-1.08536	0.0193952	0.0528759	yes	GO:0006355(regulation of transcription, DNA-dependent),GO:0045444(fat cell differentiation),GO:0051101(regulation of DNA binding),GO:0016363(nuclear matrix),GO:0005634(nucleus),GO:0003700(sequence-specific DNA binding transcription factor activity),GO:0046872(metal ion binding),GO:0042802(identical protein binding),GO:0005515(protein binding),GO:0042803(protein homodimerization activity)	05200(Pathways in cancer),05202(Transcriptional misregulation in cancers),05221(Acute myeloid leukemia)
ENSGALT00000024292	chrZ	28643720	28915973	-1	ENSGALG00000015058	PTPRD	protein tyrosine phosphatase, receptor type, D [Source:HGNC Symbol;Acc:9668]	7.33366	3.42962	2.86361	9.9794	10.6506	8.28123	4.5423	9.63706	down	2.12163	-1.08517	0.0490528	0.0496764	yes	GO:0006470(protein dephosphorylation),GO:0016311(dephosphorylation),GO:0035335(peptidyl-tyrosine dephosphorylation),GO:0004721(phosphoprotein phosphatase activity),GO:0004725(protein tyrosine phosphatase activity),GO:0016787(hydrolase activity),GO:0016791(phosphatase activity),GO:0005515(protein binding)	NA
ENSGALT00000007647	chr5	665318	702105	-1	ENSGALG00000004792	PLCB2	phospholipase C, beta 2 [Source:HGNC Symbol;Acc:9055]	14.4316	10.6094	10.4483	27.5675	23.0066	24.7201	11.8298	25.098	down	2.1216	-1.08515	0.00205043	0.0386884	yes	GO:0006629(lipid metabolic process),GO:0007165(signal transduction),GO:0016042(lipid catabolic process),GO:0035556(intracellular signal transduction),GO:0050913(sensory perception of bitter taste),GO:0005737(cytoplasm),GO:0004435(phosphatidylinositol phospholipase C activity),GO:0004871(signal transducer activity),GO:0005509(calcium ion binding),GO:0008081(phosphoric diester hydrolase activity),G…	00562(Inositol phosphate metabolism),04310(Wnt signaling pathway),04020(Calcium signaling pathway),04070(Phosphatidylinositol signaling system),04540(Gap junction),04062(Chemokine signaling pathway),04911(Insulin secretion),04912(GnRH signaling pathway),04915(Estrogen signaling pathway),04918(Thyroid hormone synthesis),04916(Melanogenesis),04270(Vascular smooth muscle contraction),04970(Salivary …
ENSGALT00000006265	chr20	5472060	5486605	1	ENSGALG00000003932	SDC4	Gallus gallus syndecan 4 (SDC4), mRNA. [Source:RefSeq mRNA;Acc:NM_001007869]	77.1999	54.5885	61.7247	23.9345	32.378	35.0738	64.5044	30.4621	up	2.11753	1.08238	0.0205283	0.052567	yes	GO:0009986(cell surface),GO:0016020(membrane),GO:0016021(integral to membrane),GO:0008092(cytoskeletal protein binding),GO:0070053(thrombospondin receptor activity),GO:0005515(protein binding)	04512(ECM-receptor interaction),04514(Cell adhesion molecules (CAMs)),05205(Proteoglycans in cancer)
ENSGALT00000011523	chr17	2640785	2707385	-1	ENSGALG00000007113	TNC	Gallus gallus tenascin C (TNC), mRNA. [Source:RefSeq mRNA;Acc:NM_205456]	24.7954	7.78078	17.5716	32.9095	40.5358	32.6483	16.7159	35.3645	down	2.11562	-1.08108	0.0435692	0.0507953	yes	GO:0009611(response to wounding),GO:0008284(positive regulation of cell proliferation),GO:0060740(prostate gland epithelium morphogenesis),GO:0007528(neuromuscular junction development),GO:0010628(positive regulation of gene expression),GO:0014012(peripheral nervous system axon regeneration),GO:0060739(mesenchymal-epithelial cell signaling involved in prostate gland development),GO:0005615(extrac…	04151(PI3K-Akt signaling pathway),04512(ECM-receptor interaction),04510(Focal adhesion),05206(MicroRNAs in cancer)
ENSGALT00000016353	chr5	35438586	35448264	1	ENSGALG00000010060	PSMA6	Gallus gallus proteasome (prosome, macropain) subunit, alpha type, 6 (PSMA6), mRNA. [Source:RefSeq mRNA;Acc:NM_001277443]	179.943	168.234	111.994	81.1513	53.1478	83.2594	153.391	72.5195	up	2.11516	1.08077	0.0435318	0.0508343	yes	GO:0006508(proteolysis),GO:0006511(ubiquitin-dependent protein catabolic process),GO:0051092(positive regulation of NF-kappaB transcription factor activity),GO:0051603(proteolysis involved in cellular protein catabolic process),GO:0000502(proteasome complex),GO:0000932(cytoplasmic mRNA processing body),GO:0005634(nucleus),GO:0005737(cytoplasm),GO:0005839(proteasome core complex),GO:0005844(polyso…	03050(Proteasome)
ENSGALT00000016165	chr27	3102832	3119721	1	ENSGALG00000009943	FAM117A	family with sequence similarity 117, member A [Source:HGNC Symbol;Acc:24179]	7.94882	11.5338	13.3188	24.1658	24.4885	20.4796	10.9338	23.0446	down	2.10765	-1.07564	0.00455015	0.0459501	yes	()	NA
ENSGALT00000008032	chrZ	79449071	79530605	1	ENSGALG00000005016	ZNF608	zinc finger protein 608 [Source:HGNC Symbol;Acc:29238]	16.3377	9.92056	9.90496	22.5894	32.3158	21.2908	12.0544	25.3987	down	2.107	-1.07519	0.0404296	0.0503264	yes	GO:0046872(metal ion binding)	NA
ENSGALT00000013654	chr7	11004602	11015090	-1	ENSGALG00000008381	TMEM237	transmembrane protein 237 [Source:HGNC Symbol;Acc:14432]	16.5181	8.51704	8.48071	20.9902	26.9196	22.6639	11.1719	23.5246	down	2.10568	-1.07429	0.0237463	0.0508243	yes	GO:0030111(regulation of Wnt signaling pathway),GO:0042384(cilium assembly),GO:0035869(ciliary transition zone)	NA
ENSGALT00000027257	chr1	143142401	143197059	1	ENSGALG00000016870	TMTC4	transmembrane and tetratricopeptide repeat containing 4 [Source:HGNC Symbol;Acc:25904]	3.24452	2.88611	2.67986	6.10751	5.97937	6.44376	2.93683	6.17688	down	2.10325	-1.07262	0.000137949	0.0494548	yes	GO:0005515(protein binding)	NA
ENSGALT00000009056	chr14	6259322	6288467	1	ENSGALG00000005646	TSC2	Uncharacterized protein [Source:UniProtKB/TrEMBL;Acc:F1NGI4]	5.61181	3.84623	4.56148	11.8917	10.0095	7.58389	4.67317	9.82838	down	2.10315	-1.07255	0.0388688	0.0496772	yes	GO:0032007(negative regulation of TOR signaling),GO:0043547(positive regulation of GTPase activity),GO:0051056(regulation of small GTPase mediated signal transduction),GO:0008285(negative regulation of cell proliferation),GO:0030100(regulation of endocytosis),GO:0006606(protein import into nucleus),GO:0007507(heart development),GO:0001843(neural tube closure),GO:0006469(negative regulation of pro…	04151(PI3K-Akt signaling pathway),04150(mTOR signaling pathway),04115(p53 signaling pathway),04910(Insulin signaling pathway)
ENSGALT00000010309	chr5	12238926	12263999	1	ENSGALG00000006382	PTPRJ	Gallus gallus protein tyrosine phosphatase, receptor type, J (PTPRJ), mRNA. [Source:RefSeq mRNA;Acc:NM_204621]	55.1437	41.5769	43.2249	25.2525	19.8778	21.5115	46.6485	22.214	up	2.09996	1.07037	0.0191511	0.0534293	yes	GO:0006470(protein dephosphorylation),GO:0016311(dephosphorylation),GO:0035335(peptidyl-tyrosine dephosphorylation),GO:0004721(phosphoprotein phosphatase activity),GO:0004725(protein tyrosine phosphatase activity),GO:0016787(hydrolase activity),GO:0016791(phosphatase activity),GO:0005515(protein binding),GO:0050918(positive chemotaxis),GO:0042059(negative regulation of epidermal growth factor rec…	04520(Adherens junction)
ENSGALT00000029703	chr24	3558096	3571802	-1	ENSGALG00000018819	TBCEL	tubulin folding cofactor E-like [Source:HGNC Symbol;Acc:28115]	3.30642	6.17959	5.86196	12.393	9.26865	10.3812	5.11599	10.6809	down	2.08776	-1.06195	0.0124936	0.051188	yes	()	NA
ENSGALT00000017393	chrZ	43412815	43443779	1	ENSGALG00000010694	SECISBP2	SECIS binding protein 2 [Source:HGNC Symbol;Acc:30972]	3.05767	4.73484	4.52229	6.71432	10.801	8.19104	4.10494	8.56878	down	2.08743	-1.06173	0.0477839	0.0500892	yes	GO:0030529(ribonucleoprotein complex),GO:0005739(mitochondrion),GO:0003730(mRNA 3'-UTR binding),GO:0005515(protein binding),GO:0043021(ribonucleoprotein complex binding),GO:0035368(selenocysteine insertion sequence binding)	NA
ENSGALT00000025011	chr2	114093263	114114645	-1	ENSGALG00000015512	CYP7B1	cytochrome P450, family 7, subfamily B, polypeptide 1 [Source:HGNC Symbol;Acc:2652]	5.19917	3.45941	3.93105	9.20236	6.67396	10.3719	4.19654	8.74941	down	2.08491	-1.05998	0.035489	0.0505877	yes	GO:0055114(oxidation-reduction process),GO:0060740(prostate gland epithelium morphogenesis),GO:0050679(positive regulation of epithelial cell proliferation),GO:0033147(negative regulation of intracellular estrogen receptor signaling pathway),GO:0004497(monooxygenase activity),GO:0005506(iron ion binding),GO:0016705(oxidoreductase activity, acting on paired donors, with incorporation or reduction …	00120(Primary bile acid biosynthesis),00140(Steroid hormone biosynthesis)
ENSGALT00000027170	chr1	136831179	136848516	-1	ENSGALG00000016829	LAMP1	Gallus gallus lysosomal-associated membrane protein 1 (LAMP1), mRNA. [Source:RefSeq mRNA;Acc:NM_205283]	255.331	274.441	242.832	149.346	111.483	109.952	257.535	123.594	up	2.08372	1.05916	0.00164514	0.0421275	yes	GO:0016020(membrane),GO:0005770(late endosome),GO:0005764(lysosome),GO:0005737(cytoplasm),GO:0009897(external side of plasma membrane),GO:0009986(cell surface),GO:0031982(vesicle),GO:0044194(cytolytic granule),GO:0042383(sarcolemma),GO:0005771(multivesicular body),GO:0005768(endosome),GO:0042470(melanosome),GO:0005515(protein binding)	04145(Phagosome),04142(Lysosome),05152(Tuberculosis)
ENSGALT00000038810	chr5	16223259	16237931	-1	ENSGALG00000007287	ZFP91	Uncharacterized protein [Source:UniProtKB/TrEMBL;Acc:Q5F394]	10.8572	9.02892	10.9797	19.3196	25.4159	19.4813	10.2886	21.4056	down	2.08052	-1.05694	0.0228212	0.0512939	yes	GO:0003676(nucleic acid binding),GO:0046872(metal ion binding)	NA
ENSGALT00000006485	chr4	1508590	1532452	-1	ENSGALG00000004079	ENOX2	Gallus gallus ecto-NOX disulfide-thiol exchanger 2 (ENOX2), mRNA. [Source:RefSeq mRNA;Acc:NM_001006427]	12.1577	9.15172	7.08053	23.4092	18.8876	16.7661	9.46333	19.6876	down	2.08041	-1.05687	0.0163447	0.056342	yes	GO:0007624(ultradian rhythm),GO:0055114(oxidation-reduction process),GO:0009897(external side of plasma membrane),GO:0000166(nucleotide binding),GO:0003676(nucleic acid binding),GO:0015035(protein disulfide oxidoreductase activity)	NA
ENSGALT00000037761	chr4	53358779	53364025	-1	ENSGALG00000011884	EXOSC9	Gallus gallus exosome component 9 (EXOSC9), mRNA. [Source:RefSeq mRNA;Acc:NM_001034828]	6.93223	12.3912	14.2984	28.2286	23.1952	18.3988	11.2073	23.2742	down	2.0767	-1.05429	0.0310646	0.0510856	yes	GO:0071035(nuclear polyadenylation-dependent rRNA catabolic process),GO:0000956(nuclear-transcribed mRNA catabolic process),GO:0071028(nuclear mRNA surveillance),GO:0043928(exonucleolytic nuclear-transcribed mRNA catabolic process involved in deadenylation-dependent decay),GO:0030307(positive regulation of cell growth),GO:0000178(exosome (RNase complex)),GO:0005737(cytoplasm),GO:0005634(nucleus),…	03018(RNA degradation)
ENSGALT00000016690	chr5	37210588	37268314	-1	ENSGALG00000010258	LTBP2	latent transforming growth factor beta binding protein 2 [Source:HGNC Symbol;Acc:6715]	7.90986	8.85188	6.22851	13.7688	19.3636	14.5453	7.66342	15.8926	down	2.07383	-1.05229	0.0275988	0.0506095	yes	GO:0005615(extracellular space),GO:0031012(extracellular matrix),GO:0070062(extracellular vesicular exosome),GO:0005509(calcium ion binding),GO:0005515(protein binding)	NA
ENSGALT00000016850	chr5	37839126	37870137	1	ENSGALG00000010350	GPATCH2L	G patch domain containing 2-like [Source:HGNC Symbol;Acc:20210]	8.51947	7.28189	7.16518	17.6257	17.8486	12.0972	7.65551	15.8572	down	2.07134	-1.05057	0.0427629	0.0508474	yes	GO:0005515(protein binding)	NA
ENSGALT00000004075	chr19	4960947	4985586	1	ENSGALG00000002587	CRCP	CGRP receptor component [Source:HGNC Symbol;Acc:17888]	32.7499	22.5913	29.6963	10.4806	14.8305	15.8579	28.3458	13.723	up	2.06557	1.04654	0.0221691	0.051776	yes	GO:0006351(transcription, DNA-templated),GO:0006383(transcription from RNA polymerase III promoter),GO:0007218(neuropeptide signaling pathway),GO:0044237(cellular metabolic process),GO:0001669(acrosomal vesicle),GO:0009360(DNA polymerase III complex),GO:0000166(nucleotide binding),GO:0001635(calcitonin gene-related polypeptide receptor activity),GO:0003824(catalytic activity),GO:0003899(DNA-direc…	NA
ENSGALT00000036256	chr12	8851102	8917084	1	ENSGALG00000005678	FLNB	Gallus gallus filamin B, beta (FLNB), mRNA. [Source:RefSeq mRNA;Acc:NM_001030341]	195.306	161.111	246.298	109.839	101.491	80.6994	200.905	97.3431	up	2.06388	1.04536	0.0406241	0.0503065	yes	GO:0007519(skeletal muscle tissue development),GO:0005737(cytoplasm),GO:0005886(plasma membrane),GO:0005925(focal adhesion),GO:0001725(stress fiber),GO:0003779(actin binding),GO:0005515(protein binding),GO:0042802(identical protein binding)	04010(MAPK signaling pathway),04510(Focal adhesion),05205(Proteoglycans in cancer),05132(Salmonella infection)
ENSGALT00000002784	chr18	4222671	4233797	1	ENSGALG00000001802	JMJD6	Gallus gallus jumonji domain containing 6 (JMJD6), mRNA. [Source:RefSeq mRNA;Acc:NM_001030703]	5.71326	5.79974	3.24997	8.26286	9.94668	12.2006	4.92099	10.1367	down	2.0599	-1.04257	0.0245052	0.0510762	yes	GO:0001568(blood vessel development),GO:0001822(kidney development),GO:0002040(sprouting angiogenesis),GO:0006915(apoptotic process),GO:0007166(cell surface receptor signaling pathway),GO:0007507(heart development),GO:0018395(peptidyl-lysine hydroxylation to 5-hydroxy-L-lysine),GO:0030324(lung development),GO:0033077(T cell differentiation in thymus),GO:0042116(macrophage activation),GO:0043277(a…	NA
ENSGALT00000001197	chr19	202548	251494	1	ENSGALG00000000823	BAZ1B	bromodomain adjacent to zinc finger domain, 1B [Source:HGNC Symbol;Acc:961]	14.9967	14.8604	17.2551	34.1458	31.2172	31.1705	15.7041	32.1778	down	2.04901	-1.03493	0.000264935	0.0633196	yes	GO:0034725(DNA replication-dependent nucleosome disassembly),GO:0006337(nucleosome disassembly),GO:0043044(ATP-dependent chromatin remodeling),GO:0016572(histone phosphorylation),GO:0018108(peptidyl-tyrosine phosphorylation),GO:0006974(cellular response to DNA damage stimulus),GO:0006355(regulation of transcription, DNA-dependent),GO:0006302(double-strand break repair),GO:0006338(chromatin remode…	NA
ENSGALT00000004448	chr19	5305962	5329691	-1	ENSGALG00000002783	SLC43A2	solute carrier family 43 (amino acid system L transporter), member 2 [Source:HGNC Symbol;Acc:23087]	111.111	155.971	106.926	57.2798	73.0346	52.4657	124.669	60.9267	up	2.04622	1.03296	0.0412308	0.0505342	yes	GO:0015807(L-amino acid transport),GO:0055085(transmembrane transport),GO:0016021(integral to membrane),GO:0005886(plasma membrane),GO:0015179(L-amino acid transmembrane transporter activity)	NA
ENSGALT00000024687	chr3	66702483	66716393	-1	ENSGALG00000015297	FOXO3	forkhead box O3 [Source:HGNC Symbol;Acc:3821]	100.832	94.5991	84.1253	51.0477	47.1386	38.5541	93.1856	45.5801	up	2.04444	1.0317	0.00195373	0.0400236	yes	GO:0006355(regulation of transcription, DNA-dependent),GO:0006974(cellular response to DNA damage stimulus),GO:0007389(pattern specification process),GO:0008286(insulin receptor signaling pathway),GO:0009790(embryo development),GO:0009888(tissue development),GO:0042127(regulation of cell proliferation),GO:0045944(positive regulation of transcription from RNA polymerase II promoter),GO:0048513(org…	04151(PI3K-Akt signaling pathway),04062(Chemokine signaling pathway),04917(Prolactin signaling pathway),04722(Neurotrophin signaling pathway),05213(Endometrial cancer),05223(Non-small cell lung cancer)
ENSGALT00000021773	chr1	51349989	51354323	-1	ENSGALG00000012487	MPST	Gallus gallus mercaptopyruvate sulfurtransferase (MPST), nuclear gene encoding mitochondrial protein, mRNA. [Source:RefSeq mRNA;Acc:NM_001277377]	11.1226	14.5351	16.4603	4.41155	7.6441	8.56327	14.0393	6.87297	up	2.04269	1.03047	0.0250668	0.0513511	yes	GO:0005739(mitochondrion),GO:0005737(cytoplasm),GO:0005743(mitochondrial inner membrane),GO:0004792(thiosulfate sulfurtransferase activity),GO:0016740(transferase activity)	00920(Sulfur metabolism),00270(Cysteine and methionine metabolism),04122(Sulfur relay system)
ENSGALT00000039041	chr6	25774429	25775712	1	ENSGALG00000023521	ADRA2A	adrenoceptor alpha 2A [Source:HGNC Symbol;Acc:281]	4.36504	4.22458	5.29714	1.15683	3.41424	2.23518	4.62892	2.26875	up	2.04029	1.02878	0.048794	0.049695	yes	GO:0001819(positive regulation of cytokine production),GO:0006940(regulation of smooth muscle contraction),GO:0007165(signal transduction),GO:0007186(G-protein coupled receptor signaling pathway),GO:0019229(regulation of vasoconstriction),GO:0030168(platelet activation),GO:0030335(positive regulation of cell migration),GO:0032147(activation of protein kinase activity),GO:0032148(activation of pro…	04080(Neuroactive ligand-receptor interaction)
ENSGALT00000018181	chr5	48046014	48063255	1	ENSGALG00000011148	HHIPL1	HHIP-like 1 [Source:HGNC Symbol;Acc:19710]	38.1396	31.2485	30.8559	20.5594	15.3972	13.261	33.4147	16.4059	up	2.03675	1.02627	0.00620599	0.0473372	yes	GO:0005975(carbohydrate metabolic process),GO:0016020(membrane),GO:0005044(scavenger receptor activity),GO:0003824(catalytic activity),GO:0016901(oxidoreductase activity, acting on the CH-OH group of donors, quinone or similar compound as acceptor),GO:0048038(quinone binding)	NA
ENSGALT00000016778	chr1	38593310	38850635	1	ENSGALG00000010311	NAV3	neuron navigator 3 [Source:HGNC Symbol;Acc:15998]	5.27223	3.26453	3.57052	7.59003	9.26754	7.80103	4.03576	8.21953	down	2.03668	-1.02622	0.0074251	0.0479621	yes	GO:0005634(nucleus),GO:0005635(nuclear envelope),GO:0000166(nucleotide binding),GO:0005524(ATP binding),GO:0017111(nucleoside-triphosphatase activity),GO:0005515(protein binding)	NA
ENSGALT00000014738	chr3	7979475	7990141	-1	ENSGALG00000009052	LBH	Gallus gallus limb bud and heart development homolog (mouse) (LBH), mRNA. [Source:RefSeq mRNA;Acc:NM_001031038]	69.1288	51.9597	66.5145	100.097	155.008	126.591	62.5344	127.232	down	2.0346	-1.02474	0.0435899	0.0505727	yes	GO:0045893(positive regulation of transcription, DNA-dependent),GO:0005634(nucleus),GO:0005730(nucleolus),GO:0043231(intracellular membrane-bounded organelle)	NA
ENSGALT00000008553	chr2	2303738	2310415	-1	ENSGALG00000005331	GJC2	Gallus gallus gap junction protein, gamma 12, 47kDa (GJC2), mRNA. [Source:RefSeq mRNA;Acc:NM_001199581]	4.92884	6.4862	5.46148	13.0858	10.9439	10.2985	5.6255	11.4428	down	2.03408	-1.02438	0.00828946	0.0491202	yes	GO:0007154(cell communication),GO:0007267(cell-cell signaling),GO:0009636(response to toxic substance),GO:0005886(plasma membrane),GO:0005921(gap junction),GO:0005922(connexon complex),GO:0016020(membrane),GO:0016021(integral to membrane),GO:0030054(cell junction),GO:0043209(myelin sheath),GO:0005243(gap junction channel activity)	NA
ENSGALT00000005483	chr26	5028663	5038433	-1	ENSGALG00000003461	USP49	ubiquitin specific peptidase 49 [Source:HGNC Symbol;Acc:20078]	7.13279	9.5623	9.42232	13.5655	20.2588	19.1956	8.7058	17.6733	down	2.03006	-1.02152	0.0365195	0.0502582	yes	GO:0006508(proteolysis),GO:0006511(ubiquitin-dependent protein catabolic process),GO:0035616(histone H2B conserved C-terminal lysine deubiquitination),GO:0000398(mRNA splicing, via spliceosome),GO:0005737(cytoplasm),GO:0005634(nucleus),GO:0004221(ubiquitin thiolesterase activity),GO:0008233(peptidase activity),GO:0008234(cysteine-type peptidase activity),GO:0008270(zinc ion binding),GO:0016787(hy…	NA
ENSGALT00000037206	chr2	66546040	66558972	1	ENSGALG00000012830	IRF4	Gallus gallus interferon regulatory factor 4 (IRF4), mRNA. [Source:RefSeq mRNA;Acc:NM_204299]	15.938	11.9009	11.8428	6.43017	8.29418	4.86623	13.2273	6.53019	up	2.02556	1.01832	0.0193316	0.0531063	yes	GO:0006355(regulation of transcription, DNA-dependent),GO:0006479(protein methylation),GO:0018022(peptidyl-lysine methylation),GO:0034122(negative regulation of toll-like receptor signaling pathway),GO:0042832(defense response to protozoan),GO:0043011(myeloid dendritic cell differentiation),GO:0043388(positive regulation of DNA binding),GO:0043966(histone H3 acetylation),GO:0043967(histone H4 ace…	NA
ENSGALT00000009725	chr9	4388903	4408558	1	ENSGALG00000006039	SNED1	sushi, nidogen and EGF-like domains 1 [Source:HGNC Symbol;Acc:24696]	8.75059	10.9913	11.2897	17.0568	24.0367	21.6523	10.3439	20.9153	down	2.022	-1.01578	0.0236457	0.0507604	yes	GO:0007160(cell-matrix adhesion),GO:0005509(calcium ion binding),GO:0005515(protein binding)	NA
ENSGALT00000036281	chr12	2937527	2944369	1	ENSGALG00000003948	ALAS1	Gallus gallus aminolevulinate, delta-, synthase 1 (ALAS1), nuclear gene encoding mitochondrial protein, mRNA. [Source:RefSeq mRNA;Acc:NM_001018012]	39.9765	49.5807	46.0874	24.519	20.3752	22.3154	45.2149	22.4032	up	2.01823	1.01309	0.00701724	0.0465867	yes	GO:0006778(porphyrin-containing compound metabolic process),GO:0006782(protoporphyrinogen IX biosynthetic process),GO:0006783(heme biosynthetic process),GO:0008152(metabolic process),GO:0009058(biosynthetic process),GO:0033014(tetrapyrrole biosynthetic process),GO:0005739(mitochondrion),GO:0005759(mitochondrial matrix),GO:0005737(cytoplasm),GO:0005634(nucleus),GO:0003824(catalytic activity),GO:00…	00260(Glycine),00860(Porphyrin and chlorophyll metabolism)
ENSGALT00000020192	chr2	52415816	52480860	-1	ENSGALG00000012363	EGFR	Gallus gallus epidermal growth factor receptor (EGFR), mRNA. [Source:RefSeq mRNA;Acc:NM_205497]	10.2097	5.25511	9.38134	16.2609	17.8445	15.8018	8.28205	16.6357	down	2.00865	-1.00622	0.0202718	0.0524724	yes	GO:0006468(protein phosphorylation),GO:0007169(transmembrane receptor protein tyrosine kinase signaling pathway),GO:0016310(phosphorylation),GO:0018108(peptidyl-tyrosine phosphorylation),GO:0023014(signal transduction by phosphorylation),GO:0007173(epidermal growth factor receptor signaling pathway),GO:0007611(learning or memory),GO:0071364(cellular response to epidermal growth factor stimulus),G…	04014(Ras signaling pathway),04010(MAPK signaling pathway),04013(MAPK signaling pathway - fly),04012(ErbB signaling pathway),04066(HIF-1 signaling pathway),04020(Calcium signaling pathway),04151(PI3K-Akt signaling pathway),04060(Cytokine-cytokine receptor interaction),04144(Endocytosis),04810(Regulation of actin cytoskeleton),04510(Focal adhesion),04520(Adherens junction),04540(Gap junction),0491…
ENSGALT00000008153	chr19	7166864	7187511	-1	ENSGALG00000005084	TRIM37	Gallus gallus tripartite motif containing 37 (TRIM37), mRNA. [Source:RefSeq mRNA;Acc:NM_001006224]	9.0786	6.14602	7.45782	16.0543	14.2656	15.1226	7.56081	15.1475	down	2.00342	-1.00247	0.0032931	0.047223	yes	GO:0032088(negative regulation of NF-kappaB transcription factor activity),GO:0051865(protein autoubiquitination),GO:0070842(aggresome assembly),GO:0046600(negative regulation of centriole replication),GO:0005622(intracellular),GO:0005777(peroxisome),GO:0005829(cytosol),GO:0016235(aggresome),GO:0005737(cytoplasm),GO:0004842(ubiquitin-protein ligase activity),GO:0005164(tumor necrosis factor recep…	04120(Ubiquitin mediated proteolysis)
ENSGALT00000016184	chr8	18560220	18571250	1	ENSGALG00000009957	TIE1	tyrosine kinase with immunoglobulin-like and EGF-like domains 1 [Source:HGNC Symbol;Acc:11809]	37.8083	38.0323	29.9293	61.1232	88.452	62.1219	35.2566	70.5657	down	2.00149	-1.00107	0.0488719	0.0496334	yes	GO:0006468(protein phosphorylation),GO:0016310(phosphorylation),GO:0018108(peptidyl-tyrosine phosphorylation),GO:0001701(in utero embryonic development),GO:0030336(negative regulation of cell migration),GO:0032526(response to retinoic acid),GO:0016525(negative regulation of angiogenesis),GO:0045026(plasma membrane fusion),GO:0016020(membrane),GO:0016021(integral to membrane),GO:0005886(plasma mem…	NA
ENSGALT00000039198	chrZ	10206259	10227283	-1	ENSGALG00000003326	AMACR	Gallus gallus alpha-methylacyl-CoA racemase (AMACR), nuclear gene encoding mitochondrial protein, mRNA. [Source:RefSeq mRNA;Acc:NM_001031448]	1.61155	2.22401	2.46497	5.25735	3.42917	3.92233	2.10018	4.20295	down	2.00123	-1.00089	0.0435878	0.0506522	yes	GO:0008152(metabolic process),GO:0008206(bile acid metabolic process),GO:0005777(peroxisome),GO:0005739(mitochondrion),GO:0005737(cytoplasm),GO:0003824(catalytic activity),GO:0008111(alpha-methylacyl-CoA racemase activity),GO:0005102(receptor binding)	00120(Primary bile acid biosynthesis),04146(Peroxisome)
ENSGALT00000010139	chr3	15743296	15746220	1	ENSGALG00000008538	GINS1	Gallus gallus GINS complex subunit 1 (Psf1 homolog) (GINS1), mRNA. [Source:RefSeq mRNA;Acc:NM_001012603]	2.48789	4.70864	2.80214	6.00944	5.80026	8.14859	3.33289	6.65276	down	1.99609	-0.99718	0.0316989	0.0511895	yes	GO:0001833(inner cell mass cell proliferation),GO:0006260(DNA replication),GO:0005634(nucleus),GO:0005737(cytoplasm),GO:0005515(protein binding)	NA
ENSGALT00000044339	chr11	17936906	17939727	-1	ENSGALG00000027272	APRT	Gallus gallus adenine phosphoribosyltransferase (APRT), transcript variant 1, mRNA. [Source:RefSeq mRNA;Acc:NM_001277647]	11.0861	7.65841	13.5964	19.5759	25.6001	19.2885	10.7803	21.4882	down	1.99328	-0.995143	0.0172498	0.0544851	yes	GO:0006168(adenine salvage),GO:0009116(nucleoside metabolic process),GO:0007625(grooming behavior),GO:0006166(purine ribonucleoside salvage),GO:0005737(cytoplasm),GO:0005634(nucleus),GO:0003999(adenine phosphoribosyltransferase activity),GO:0016740(transferase activity),GO:0016208(AMP binding),GO:0002055(adenine binding)	00230(Purine metabolism)
ENSGALT00000010946	chr15	8849198	8892315	-1	ENSGALG00000006766	DEPDC5	DEP domain containing 5 [Source:HGNC Symbol;Acc:18423]	4.75228	3.85785	6.31657	9.04198	8.35357	12.1594	4.97557	9.85165	down	1.98	-0.985504	0.0323644	0.0504463	yes	GO:0035556(intracellular signal transduction),GO:0005765(lysosomal membrane),GO:0005829(cytosol),GO:0048471(perinuclear region of cytoplasm)	NA
ENSGALT00000001191	chr11	19175526	19186003	1	ENSGALG00000000817	ZNF821	zinc finger protein 821 [Source:HGNC Symbol;Acc:28043]	8.50665	6.59264	6.91362	14.4151	11.805	17.3181	7.33764	14.5127	down	1.97785	-0.983932	0.0334438	0.0502709	yes	GO:0003676(nucleic acid binding),GO:0046872(metal ion binding)	NA
ENSGALT00000019399	chr5	53951087	54056201	-1	ENSGALG00000011889	PRKCH	protein kinase C, eta [Source:HGNC Symbol;Acc:9403]	10.0585	9.51846	9.04532	2.81554	5.9953	5.67595	9.54075	4.82893	up	1.97575	0.9824	0.0346723	0.0507347	yes	GO:0006468(protein phosphorylation),GO:0016310(phosphorylation),GO:0035556(intracellular signal transduction),GO:0034351(negative regulation of glial cell apoptotic process),GO:2000810(regulation of tight junction assembly),GO:0050861(positive regulation of B cell receptor signaling pathway),GO:0051092(positive regulation of NF-kappaB transcription factor activity),GO:0060252(positive regulation …	NA
ENSGALT00000009964	chr5	11253945	11319342	-1	ENSGALG00000006172	ABCC8	ATP-binding cassette, sub-family C (CFTR/MRP), member 8 [Source:HGNC Symbol;Acc:59]	116.426	56.1092	69.2854	186.041	133.849	157.612	80.6067	159.168	down	1.97462	-0.981575	0.0312451	0.0511478	yes	GO:0006200(ATP catabolic process),GO:0006810(transport),GO:0006813(potassium ion transport),GO:0055085(transmembrane transport),GO:0016020(membrane),GO:0016021(integral to membrane),GO:0008076(voltage-gated potassium channel complex),GO:0005886(plasma membrane),GO:0000166(nucleotide binding),GO:0005524(ATP binding),GO:0008281(sulfonylurea receptor activity),GO:0016887(ATPase activity),GO:0017111(…	02010(ABC transporters),04911(Insulin secretion),04930(Type II diabetes mellitus)
ENSGALT00000010440	chr12	11253813	11258331	1	ENSGALG00000006465	CCDC51	coiled-coil domain containing 51 [Source:HGNC Symbol;Acc:25714]	9.32758	9.93017	7.66047	20.6369	14.4814	17.9388	8.97274	17.6857	down	1.97105	-0.978961	0.0272884	0.0505576	yes	GO:0005634(nucleus),GO:0005739(mitochondrion)	NA
ENSGALT00000044635	chr21	601687	603538	1	ENSGALG00000026499	TNFRSF25	tumor necrosis factor receptor superfamily, member 25 [Source:HGNC Symbol;Acc:11910]	12.1044	10.2912	9.94099	2.67804	7.13903	6.58919	10.7789	5.46875	up	1.97099	0.97892	0.0450828	0.0501153	yes	GO:0007165(signal transduction),GO:0005886(plasma membrane),GO:0005515(protein binding)	04060(Cytokine-cytokine receptor interaction)
ENSGALT00000002942	chr20	1650797	1663938	-1	ENSGALG00000001903	MAP1LC3A	microtubule-associated protein 1 light chain 3 alpha [Source:HGNC Symbol;Acc:6838]	58.5964	76.9615	51.5565	41.5135	30.4703	22.9732	62.3715	31.6523	up	1.97052	0.978575	0.0346651	0.050828	yes	GO:0006914(autophagy),GO:0000045(autophagic vacuole assembly),GO:0000422(mitochondrion degradation),GO:0000421(autophagic vacuole membrane),GO:0005737(cytoplasm),GO:0031090(organelle membrane),GO:0005776(autophagic vacuole),GO:0005829(cytosol),GO:0008429(phosphatidylethanolamine binding),GO:0005543(phospholipid binding),GO:0005515(protein binding)	NA
ENSGALT00000020311	chr5	58202924	58265575	-1	ENSGALG00000012426	DDHD1	DDHD domain containing 1 [Source:HGNC Symbol;Acc:19714]	46.7995	30.6386	37.0574	24.0261	15.7286	18.4614	38.1652	19.4054	up	1.96673	0.9758	0.0381371	0.049717	yes	GO:0046872(metal ion binding)	NA
ENSGALT00000016704	chr5	37286003	37304516	-1	ENSGALG00000010270	AREL1	apoptosis resistant E3 ubiquitin protein ligase 1 [Source:HGNC Symbol;Acc:20363]	9.26398	4.61075	6.16133	14.3405	12.5164	12.5257	6.67869	13.1275	down	1.96558	-0.974957	0.0272497	0.0506166	yes	GO:0016567(protein ubiquitination),GO:0043066(negative regulation of apoptotic process),GO:0005829(cytosol),GO:0004842(ubiquitin-protein ligase activity),GO:0016874(ligase activity)	NA
ENSGALT00000022497	chr2	96787090	96880343	-1	ENSGALG00000013872	SEH1L	SEH1-like (S. cerevisiae) [Source:HGNC Symbol;Acc:30379]	9.39872	12.5288	10.8197	6.84987	4.36438	5.46746	10.9157	5.56057	up	1.96306	0.973101	0.0110067	0.0493237	yes	GO:0051315(attachment of spindle microtubules to kinetochore involved in mitotic sister chromatid segregation),GO:0006999(nuclear pore organization),GO:0007080(mitotic metaphase plate congression),GO:0000776(kinetochore),GO:0005515(protein binding)	03013(RNA transport)
ENSGALT00000043311	chr6	11687381	11789723	1	ENSGALG00000026864	ZCCHC24	zinc finger, CCHC domain containing 24 [Source:HGNC Symbol;Acc:26911]	7.40221	6.93185	7.52666	14.2577	16.7781	11.8713	7.28691	14.3024	down	1.96275	-0.972877	0.0365802	0.0500534	yes	GO:0003676(nucleic acid binding),GO:0008270(zinc ion binding)	NA
ENSGALT00000003234	chr10	899894	1036065	-1	ENSGALG00000002078	MYO9A	myosin IXA [Source:HGNC Symbol;Acc:7608]	5.20021	7.63484	3.73245	10.4463	11.0937	10.9603	5.5225	10.8334	down	1.96168	-0.972093	0.0395207	0.0498879	yes	GO:0007165(signal transduction),GO:0035556(intracellular signal transduction),GO:0005622(intracellular),GO:0016459(myosin complex),GO:0000166(nucleotide binding),GO:0003774(motor activity),GO:0005524(ATP binding),GO:0046872(metal ion binding),GO:0005515(protein binding)	NA
ENSGALT00000006529	chr14	2555735	2582748	-1	ENSGALG00000004104	INTS1	integrator complex subunit 1 [Source:HGNC Symbol;Acc:24555]	7.2482	14.7505	14.0691	23.502	25.4955	21.5938	12.0226	23.5304	down	1.95718	-0.96878	0.0250621	0.0514887	yes	GO:0016180(snRNA processing),GO:0043066(negative regulation of apoptotic process),GO:0043154(negative regulation of cysteine-type endopeptidase activity involved in apoptotic process),GO:0001833(inner cell mass cell proliferation),GO:0001832(blastocyst growth),GO:0034474(U2 snRNA 3'-end processing),GO:0032039(integrator complex),GO:0005634(nucleus),GO:0005488(binding)	NA
ENSGALT00000021539	chr2	85762002	85791468	-1	ENSGALG00000013183	TERT	Gallus gallus telomerase reverse transcriptase (TERT), mRNA. [Source:RefSeq mRNA;Acc:NM_001031007]	0.534423	0.783885	0.735691	0.400621	0.326321	0.323322	0.684666	0.350088	up	1.9557	0.967682	0.0376133	0.0501278	yes	GO:0006278(RNA-dependent DNA replication),GO:0007004(telomere maintenance via telomerase),GO:0022616(DNA strand elongation),GO:0032203(telomere formation via telomerase),GO:0090399(replicative senescence),GO:2001240(negative regulation of extrinsic apoptotic signaling pathway in absence of ligand),GO:0005634(nucleus),GO:0005654(nucleoplasm),GO:0005697(telomerase holoenzyme complex),GO:0016605(PML…	05166(HTLV-I infection)
ENSGALT00000011962	chr13	16854278	16904972	-1	ENSGALG00000007394	NR3C1	Gallus gallus nuclear receptor subfamily 3, group C, member 1 (glucocorticoid receptor) (NR3C1), mRNA. [Source:RefSeq mRNA;Acc:NM_001037826]	11.0721	21.1935	20.5326	35.0445	34.5298	33.5138	17.5994	34.3627	down	1.95249	-0.965317	0.0339134	0.0506581	yes	GO:0006351(transcription, DNA-templated),GO:0006355(regulation of transcription, DNA-dependent),GO:0042921(glucocorticoid receptor signaling pathway),GO:0043401(steroid hormone mediated signaling pathway),GO:0043402(glucocorticoid mediated signaling pathway),GO:0043525(positive regulation of neuron apoptotic process),GO:0030325(adrenal gland development),GO:0060603(mammary gland duct morphogenesi…	04080(Neuroactive ligand-receptor interaction)
ENSGALT00000002852	chrZ	1785433	1810495	1	ENSGALG00000001843	PIAS2	Gallus gallus protein inhibitor of activated STAT, 2 (PIAS2), mRNA. [Source:RefSeq mRNA;Acc:NM_001030626]	12.8641	10.0252	7.47074	16.8076	24.9928	17.4703	10.12	19.7569	down	1.95226	-0.965143	0.0456176	0.0502425	yes	GO:0006357(regulation of transcription from RNA polymerase II promoter),GO:0045667(regulation of osteoblast differentiation),GO:0045893(positive regulation of transcription, DNA-dependent),GO:0045944(positive regulation of transcription from RNA polymerase II promoter),GO:0060766(negative regulation of androgen receptor signaling pathway),GO:0005634(nucleus),GO:0016604(nuclear body),GO:0016605(PM…	04120(Ubiquitin mediated proteolysis),04630(Jak-STAT signaling pathway),05200(Pathways in cancer),05222(Small cell lung cancer)
ENSGALT00000004087	chr19	4994110	5016258	1	ENSGALG00000002598	TPST1	tyrosylprotein sulfotransferase 1 [Source:HGNC Symbol;Acc:12020]	67.0623	62.6413	76.2889	50.0794	27.8125	27.7396	68.6642	35.2105	up	1.9501	0.963551	0.0274673	0.0504975	yes	GO:0006478(peptidyl-tyrosine sulfation),GO:0008476(protein-tyrosine sulfotransferase activity),GO:0008146(sulfotransferase activity)	NA
ENSGALT00000036373	chr1	193723743	193726040	1	ENSGALG00000028273	HBB	Gallus gallus hemoglobin, gamma G (HBG2), mRNA. [Source:RefSeq mRNA;Acc:NM_205489]	732.525	1466.53	1252.68	1910.22	2611.94	2192.75	1150.58	2238.3	down	1.94537	-0.960048	0.0220382	0.0521497	yes	GO:0006810(transport),GO:0015671(oxygen transport),GO:0005833(hemoglobin complex),GO:0005344(oxygen transporter activity),GO:0005506(iron ion binding),GO:0019825(oxygen binding),GO:0020037(heme binding),GO:0030492(hemoglobin binding),GO:0046872(metal ion binding)	NA
ENSGALT00000033152	chr9	15864983	15880897	1	ENSGALG00000008785	MCCC1	Gallus gallus methylcrotonoyl-CoA carboxylase 1 (alpha) (MCCC1), nuclear gene encoding mitochondrial protein, mRNA. [Source:RefSeq mRNA;Acc:NM_001006551]	7.24105	8.23594	9.06189	18.4417	15.73	13.5374	8.17963	15.9031	down	1.94423	-0.959198	0.0215365	0.0523447	yes	GO:0008152(metabolic process),GO:0005739(mitochondrion),GO:0005743(mitochondrial inner membrane),GO:0003824(catalytic activity),GO:0004075(biotin carboxylase activity),GO:0005524(ATP binding),GO:0016874(ligase activity),GO:0046872(metal ion binding),GO:0008716(D-alanine-D-alanine ligase activity),GO:0005515(protein binding)	00280(Valine)
ENSGALT00000007951	chr9	8726190	8728724	-1	ENSGALG00000004959	IRS1	insulin receptor substrate 1 [Source:HGNC Symbol;Acc:6125]	3.27008	7.92971	7.3748	10.7247	13.614	11.7466	6.19153	12.0284	down	1.94273	-0.958082	0.0373566	0.0498784	yes	GO:0010907(positive regulation of glucose metabolic process),GO:0032000(positive regulation of fatty acid beta-oxidation),GO:0014065(phosphatidylinositol 3-kinase signaling),GO:0046326(positive regulation of glucose import),GO:0048009(insulin-like growth factor receptor signaling pathway),GO:0045725(positive regulation of glycogen biosynthetic process),GO:0046676(negative regulation of insulin se…	04151(PI3K-Akt signaling pathway),04150(mTOR signaling pathway),04910(Insulin signaling pathway),04920(Adipocytokine signaling pathway),04960(Aldosterone-regulated sodium reabsorption),04722(Neurotrophin signaling pathway),05206(MicroRNAs in cancer),04930(Type II diabetes mellitus),04932(Non-alcoholic fatty liver disease (NAFLD))
ENSGALT00000018050	chr4	45225572	45330749	-1	ENSGALG00000011078	PTPN13	protein tyrosine phosphatase, non-receptor type 13 (APO-1/CD95 (Fas)-associated phosphatase) [Source:HGNC Symbol;Acc:9646]	9.67613	6.37124	5.41954	16.7389	13.1274	11.78	7.15564	13.8821	down	1.94003	-0.956076	0.0274297	0.0505581	yes	GO:0006470(protein dephosphorylation),GO:0016311(dephosphorylation),GO:0035335(peptidyl-tyrosine dephosphorylation),GO:0005856(cytoskeleton),GO:0030027(lamellipodium),GO:0005886(plasma membrane),GO:0005737(cytoplasm),GO:0005634(nucleus),GO:0004725(protein tyrosine phosphatase activity),GO:0016791(phosphatase activity),GO:0005515(protein binding)	NA
ENSGALT00000002508	chr12	738124	743596	-1	ENSGALG00000001642	GLT8D1	Gallus gallus glycosyltransferase 8 domain containing 1 (GLT8D1), mRNA. [Source:RefSeq mRNA;Acc:NM_001198607]	5.48896	6.43639	8.06387	13.4175	11.9889	13.3678	6.66308	12.9247	down	1.93975	-0.955873	0.00401704	0.0480036	yes	GO:0005739(mitochondrion),GO:0016757(transferase activity, transferring glycosyl groups)	NA
ENSGALT00000040587	chr21	629998	632448	1	ENSGALG00000024053	ICMT	protein-S-isoprenylcysteine O-methyltransferase [Source:RefSeq peptide;Acc:NP_001006298]	3.54818	3.69346	5.3285	8.71834	6.49961	9.14167	4.19005	8.11987	down	1.9379	-0.954491	0.0211347	0.0524345	yes	GO:0006481(C-terminal protein methylation),GO:0035264(multicellular organism growth),GO:0001701(in utero embryonic development),GO:0008284(positive regulation of cell proliferation),GO:0001889(liver development),GO:0008104(protein localization),GO:0006479(protein methylation),GO:0046578(regulation of Ras protein signal transduction),GO:0005783(endoplasmic reticulum),GO:0016021(integral to membran…	00900(Terpenoid backbone biosynthesis)
ENSGALT00000022200	chr3	59606826	59662599	-1	ENSGALG00000013651	RNF217	ring finger protein 217 [Source:HGNC Symbol;Acc:21487]	33.9679	34.3712	28.9372	14.9986	19.537	15.7095	32.4255	16.7483	up	1.93604	0.95311	0.00260245	0.042408	yes	GO:0008270(zinc ion binding),GO:0046872(metal ion binding)	NA
ENSGALT00000005688	chr14	1318113	1391627	1	ENSGALG00000003596	TRRAP	transformation/transcription domain-associated protein [Source:HGNC Symbol;Acc:12347]	15.2212	6.83316	11.1417	26.5693	18.3901	19.2622	11.0653	21.4072	down	1.93462	-0.952048	0.0437224	0.0502388	yes	GO:0043968(histone H2A acetylation),GO:0016578(histone deubiquitination),GO:0043967(histone H4 acetylation),GO:0006355(regulation of transcription, DNA-dependent),GO:0007093(mitotic cell cycle checkpoint),GO:0035267(NuA4 histone acetyltransferase complex),GO:0033276(transcription factor TFTC complex),GO:0030914(STAGA complex),GO:0005634(nucleus),GO:0005667(transcription factor complex),GO:0016772…	05166(HTLV-I infection)
ENSGALT00000043076	chrZ	20013551	20051436	1	ENSGALG00000027389	RGS7BP	regulator of G-protein signaling 7 binding protein [Source:HGNC Symbol;Acc:23271]	1.31432	1.21785	0.913791	2.46315	2.12792	2.06786	1.14865	2.21964	down	1.93239	-0.950384	0.00341407	0.0470747	yes	GO:0007186(G-protein coupled receptor signaling pathway),GO:0005886(plasma membrane),GO:0005737(cytoplasm),GO:0005634(nucleus),GO:0005515(protein binding)	NA
ENSGALT00000036427	chr1	181805653	181822734	1	ENSGALG00000017185	TMEM123	Gallus gallus transmembrane protein 123 (TMEM123), mRNA. [Source:RefSeq mRNA;Acc:NM_001006279]	170.243	163.438	167.416	90.5334	87.3993	81.434	167.032	86.4556	up	1.932	0.950097	3.35652e-05	0.0240662	yes	GO:0070267(oncosis),GO:0009897(external side of plasma membrane)	NA
ENSGALT00000010726	chr12	11450645	11461408	1	ENSGALG00000006640	BRPF1	Gallus gallus bromodomain and PHD finger containing, 1 (BRPF1), mRNA. [Source:RefSeq mRNA;Acc:NM_001031464]	4.70852	7.69627	5.89253	13.0134	13.0288	9.25728	6.09911	11.7665	down	1.92921	-0.948013	0.0252849	0.0512127	yes	GO:0043966(histone H3 acetylation),GO:0045893(positive regulation of transcription, DNA-dependent),GO:0070776(MOZ/MORF histone acetyltransferase complex),GO:0005737(cytoplasm),GO:0005886(plasma membrane),GO:0005634(nucleus),GO:0008270(zinc ion binding),GO:0046872(metal ion binding),GO:0005515(protein binding)	NA
ENSGALT00000016792	chr5	37442481	37464017	-1	ENSGALG00000010314	NEK9	NIMA-related kinase 9 [Source:HGNC Symbol;Acc:18591]	14.6871	9.49987	17.5331	26.679	32.5243	21.2688	13.9067	26.824	down	1.92886	-0.947746	0.0368841	0.0501819	yes	GO:0006468(protein phosphorylation),GO:0005739(mitochondrion),GO:0004672(protein kinase activity),GO:0004674(protein serine/threonine kinase activity),GO:0005524(ATP binding),GO:0016772(transferase activity, transferring phosphorus-containing groups),GO:0019901(protein kinase binding),GO:0004713(protein tyrosine kinase activity),GO:0005515(protein binding)	NA
ENSGALT00000017028	chr5	38497258	38509559	-1	ENSGALG00000010459	VIPAS39	VPS33B interacting protein, apical-basolateral polarity regulator, spe-39 homolog [Source:HGNC Symbol;Acc:20347]	8.70115	10.055	8.13196	16.3067	18.9483	16.5464	8.9627	17.2671	down	1.92655	-0.946023	0.00210364	0.0386747	yes	GO:0006886(intracellular protein transport),GO:0008333(endosome to lysosome transport),GO:0005737(cytoplasm),GO:0030897(HOPS complex),GO:0005770(late endosome),GO:0055037(recycling endosome),GO:0005769(early endosome),GO:0005515(protein binding)	NA
ENSGALT00000012032	chr14	11972577	11995106	-1	ENSGALG00000007434	RHBDF1	rhomboid 5 homolog 1 [Source:HGNC Symbol;Acc:HGNC:20561]	5.8155	3.78954	4.55399	7.35079	9.79773	10.1102	4.71967	9.08623	down	1.92518	-0.944994	0.0186448	0.0534732	yes	GO:0006508(proteolysis),GO:0016021(integral to membrane),GO:0004252(serine-type endopeptidase activity)	NA
ENSGALT00000000901	chr21	561501	569683	1	ENSGALG00000000634	KLHL21	kelch-like family member 21 [Source:HGNC Symbol;Acc:29041]	3.74819	4.48912	5.20376	8.7805	10.4355	6.65871	4.48035	8.62491	down	1.92505	-0.944896	0.0487104	0.0498934	yes	GO:0035853(chromosome passenger complex localization to spindle midzone),GO:0032465(regulation of cytokinesis),GO:0016567(protein ubiquitination),GO:0005827(polar microtubule),GO:0031463(Cul3-RING ubiquitin ligase complex),GO:0005515(protein binding),GO:0004842(ubiquitin-protein ligase activity)	NA
ENSGALT00000017877	chr2	31413576	31437334	-1	ENSGALG00000010973	TRA2A	Gallus gallus transformer 2 alpha homolog (Drosophila) (TRA2A), mRNA. [Source:RefSeq mRNA;Acc:NM_001006360]	46.8819	44.1822	30.9473	80.6729	68.2056	85.9012	40.6705	78.2599	down	1.92424	-0.944291	0.00648585	0.0474526	yes	GO:0000398(mRNA splicing, via spliceosome),GO:0005634(nucleus),GO:0000166(nucleotide binding),GO:0003676(nucleic acid binding)	03040(Spliceosome)
ENSGALT00000003527	chr23	4111971	4133770	-1	ENSGALG00000021631	AGO3	Gallus gallus eukaryotic translation initiation factor 2C, 3 (EIF2C3), mRNA. [Source:RefSeq mRNA;Acc:NM_001030900]	29.9372	23.6639	24.8789	13.0055	13.7506	14.0339	26.16	13.5967	up	1.924	0.944108	0.0204088	0.052637	yes	GO:0006402(mRNA catabolic process),GO:0035278(negative regulation of translation involved in gene silencing by miRNA),GO:0072091(regulation of stem cell proliferation),GO:0035068(micro-ribonucleoprotein complex),GO:0003676(nucleic acid binding),GO:0003723(RNA binding),GO:0005515(protein binding)	NA
ENSGALT00000020170	chr2	51911547	52082394	1	ENSGALG00000012346	HECW1	HECT, C2 and WW domain containing E3 ubiquitin protein ligase 1 [Source:HGNC Symbol;Acc:22195]	0.944526	0.819333	1.4666	2.31645	2.09721	1.7953	1.07682	2.06965	down	1.922	-0.942612	0.0186629	0.053312	yes	GO:0016567(protein ubiquitination),GO:0005737(cytoplasm),GO:0005634(nucleus),GO:0004842(ubiquitin-protein ligase activity),GO:0016874(ligase activity),GO:0005515(protein binding)	NA
ENSGALT00000020927	chr2	66546040	66558972	1	ENSGALG00000012830	IRF4	Gallus gallus interferon regulatory factor 4 (IRF4), mRNA. [Source:RefSeq mRNA;Acc:NM_204299]	15.3962	12.5208	12.6779	6.21158	10.0598	4.91828	13.5317	7.06322	up	1.91579	0.937941	0.0319594	0.0505848	yes	GO:0006355(regulation of transcription, DNA-dependent),GO:0006479(protein methylation),GO:0018022(peptidyl-lysine methylation),GO:0034122(negative regulation of toll-like receptor signaling pathway),GO:0042832(defense response to protozoan),GO:0043011(myeloid dendritic cell differentiation),GO:0043388(positive regulation of DNA binding),GO:0043966(histone H3 acetylation),GO:0043967(histone H4 ace…	NA
ENSGALT00000007187	chr17	5432744	5457800	-1	ENSGALG00000004512	SH3GLB2	Gallus gallus SH3-domain GRB2-like endophilin B2 (SH3GLB2), mRNA. [Source:RefSeq mRNA;Acc:NM_001006200]	11.9495	19.0475	12.9931	28.5538	30.6102	25.0923	14.6634	28.0854	down	1.91535	-0.937607	0.0100712	0.0494595	yes	GO:0005737(cytoplasm),GO:0005515(protein binding)	04144(Endocytosis)
ENSGALT00000016989	chr8	20529179	20538666	-1	ENSGALG00000010433	FAAH	fatty acid amide hydrolase [Source:HGNC Symbol;Acc:3553]	3.98685	5.42341	7.4425	11.1245	10.2908	10.8541	5.61759	10.7565	down	1.91478	-0.937181	0.0300787	0.0513486	yes	GO:0009062(fatty acid catabolic process),GO:0005737(cytoplasm),GO:0016811(hydrolase activity, acting on carbon-nitrogen (but not peptide) bonds, in linear amides),GO:0016884(carbon-nitrogen ligase activity, with glutamine as amido-N-donor),GO:0017064(fatty acid amide hydrolase activity),GO:0047372(acylglycerol lipase activity)	04723(Retrograde endocannabinoid signaling)
ENSGALT00000007158	chr15	5890702	5903184	-1	ENSGALG00000004493	RSRC2	arginine/serine-rich coiled-coil protein 2 [Source:RefSeq peptide;Acc:NP_001264738]	18.9715	15.26	16.3368	38.4887	25.4248	32.8497	16.8561	32.2544	down	1.91351	-0.936225	0.0461097	0.0500919	yes	()	NA
ENSGALT00000010365	chr15	8282545	8297517	-1	ENSGALG00000006422	KLHL22	kelch-like family member 22 [Source:HGNC Symbol;Acc:25888]	3.64202	8.61624	7.97624	13.7267	13.1409	11.7578	6.74483	12.8751	down	1.90889	-0.932732	0.0456363	0.050186	yes	GO:0000070(mitotic sister chromatid segregation),GO:0006513(protein monoubiquitination),GO:0007094(mitotic spindle assembly checkpoint),GO:0051301(cell division),GO:0005737(cytoplasm),GO:0005813(centrosome),GO:0005827(polar microtubule),GO:0031463(Cul3-RING ubiquitin ligase complex),GO:0072686(mitotic spindle),GO:0005515(protein binding)	NA
ENSGALT00000043755	chr11	14099807	14153113	-1	ENSGALG00000026258	MAF	transcription factor Maf [Source:RefSeq peptide;Acc:NP_001038136]	10.8988	12.4087	10.2296	22.9784	21.7417	19.2553	11.179	21.3251	down	1.90761	-0.931763	0.00309054	0.0471472	yes	GO:0006355(regulation of transcription, DNA-dependent),GO:0045944(positive regulation of transcription from RNA polymerase II promoter),GO:0048839(inner ear development),GO:0000122(negative regulation of transcription from RNA polymerase II promoter),GO:0002088(lens development in camera-type eye),GO:0001816(cytokine production),GO:0010628(positive regulation of gene expression),GO:0032330(regula…	05202(Transcriptional misregulation in cancers),05321(Inflammatiory bowel disease (IBD))
ENSGALT00000012926	chr7	9491834	9506981	-1	ENSGALG00000007958	GTF3C3	Gallus gallus general transcription factor IIIC, polypeptide 3, 102kDa (GTF3C3), mRNA. [Source:RefSeq mRNA;Acc:NM_001006515]	7.32642	3.51907	4.39914	9.61583	9.05801	10.3979	5.08154	9.69059	down	1.90702	-0.931318	0.045359	0.0501889	yes	GO:0000127(transcription factor TFIIIC complex),GO:0005515(protein binding)	NA
ENSGALT00000037654	chrZ	63345423	63510922	1	ENSGALG00000023089	SSBP2	single-stranded DNA binding protein 2 [Source:HGNC Symbol;Acc:15831]	20.8711	13.3238	10.0884	29.1113	32.5495	22.738	14.7611	28.133	down	1.90589	-0.930462	0.0363517	0.05022	yes	GO:0005737(cytoplasm),GO:0003697(single-stranded DNA binding),GO:0005515(protein binding)	NA
ENSGALT00000007742	chr15	6458296	6473510	1	ENSGALG00000004849	WSCD2	WSC domain containing 2 [Source:HGNC Symbol;Acc:29117]	20.0711	18.0778	20.2142	8.53797	12.3351	9.83991	19.4544	10.2377	up	1.90027	0.926207	0.00413002	0.0485446	yes	()	NA
ENSGALT00000024813	chr1	87937490	87942745	1	ENSGALG00000015378	ABHD10	abhydrolase domain containing 10 [Source:HGNC Symbol;Acc:25656]	2.85605	6.35139	3.81252	8.32606	7.29274	9.11611	4.33998	8.24497	down	1.89977	-0.925824	0.0452126	0.0501043	yes	GO:0019391(glucuronoside catabolic process),GO:0006508(proteolysis),GO:0005739(mitochondrion),GO:0005829(cytosol),GO:0004553(hydrolase activity, hydrolyzing O-glycosyl compounds),GO:0008236(serine-type peptidase activity)	NA
ENSGALT00000015779	chr6	31278697	31344582	-1	ENSGALG00000009693	CPXM2	carboxypeptidase X (M14 family), member 2 [Source:HGNC Symbol;Acc:26977]	31.2153	20.4762	24.0899	49.5182	37.4116	57.0104	25.2605	47.98	down	1.89941	-0.925552	0.0376461	0.0500784	yes	GO:0006508(proteolysis),GO:0007155(cell adhesion),GO:0005615(extracellular space),GO:0031012(extracellular matrix),GO:0004181(metallocarboxypeptidase activity),GO:0008270(zinc ion binding)	NA
ENSGALT00000045178	chr22	2588925	2591368	1	ENSGALG00000026581	GINS4	GINS complex subunit 4 (Sld5 homolog) [Source:HGNC Symbol;Acc:28226]	6.96503	10.2669	12.8512	23.8748	17.6956	15.4804	10.0277	19.0169	down	1.89643	-0.92329	0.0486967	0.0499507	yes	GO:0006260(DNA replication),GO:0005634(nucleus),GO:0005737(cytoplasm),GO:0005515(protein binding)	NA
ENSGALT00000003013	chrZ	70375294	70406517	1	ENSGALG00000001947	IKBKAP	inhibitor of kappa light polypeptide gene enhancer in B-cells, kinase complex-associated protein [Source:HGNC Symbol;Acc:5959]	11.3226	7.7652	11.2775	18.1201	23.7635	15.6722	10.1218	19.1853	down	1.89544	-0.922535	0.0445293	0.0501217	yes	GO:0006368(transcription elongation from RNA polymerase II promoter),GO:0030335(positive regulation of cell migration),GO:0016591(DNA-directed RNA polymerase II, holoenzyme),GO:0033588(Elongator holoenzyme complex),GO:0008023(transcription elongation factor complex),GO:0005730(nucleolus),GO:0005737(cytoplasm),GO:0005515(protein binding),GO:0008607(phosphorylase kinase regulator activity),GO:00036…	NA
ENSGALT00000039625	chr3	8645774	8668184	1	ENSGALG00000008957	MSH6	mutS homolog 6 [Source:HGNC Symbol;Acc:7329]	11.1184	7.03224	7.52507	17.7656	14.6737	16.13	8.55858	16.1898	down	1.89165	-0.919643	0.0109791	0.0498229	yes	GO:0006298(mismatch repair),GO:0051096(positive regulation of helicase activity),GO:0006281(DNA repair),GO:0006200(ATP catabolic process),GO:0009411(response to UV),GO:0008630(intrinsic apoptotic signaling pathway in response to DNA damage),GO:0097193(intrinsic apoptotic signaling pathway),GO:0045910(negative regulation of DNA recombination),GO:0016446(somatic hypermutation of immunoglobulin gene…	03430(Mismatch repair),05200(Pathways in cancer),05210(Colorectal cancer)
ENSGALT00000001556	chr19	661697	703472	-1	ENSGALG00000001042	MTMR4	myotubularin related protein 4 [Source:HGNC Symbol;Acc:7452]	4.77538	8.79838	10.1113	14.0419	15.3826	15.2454	7.89501	14.89	down	1.886	-0.915328	0.0411826	0.0505615	yes	GO:0016311(dephosphorylation),GO:0035335(peptidyl-tyrosine dephosphorylation),GO:0004725(protein tyrosine phosphatase activity),GO:0016787(hydrolase activity),GO:0016791(phosphatase activity),GO:0046872(metal ion binding),GO:0005515(protein binding)	NA
ENSGALT00000019339	chr1	48916533	48964180	1	ENSGALG00000011854	UBN2	Gallus gallus ubinuclein 2 (UBN2), mRNA. [Source:RefSeq mRNA;Acc:NM_001277750]	9.18402	8.35434	10.8729	19.2856	16.5506	17.6754	9.47042	17.8372	down	1.88346	-0.913387	0.00155586	0.0507068	yes	GO:0005634(nucleus)	NA
ENSGALT00000011272	chr17	4660792	4785977	1	ENSGALG00000006958	novel gene	Uncharacterized protein [Source:UniProtKB/TrEMBL;Acc:F1NHH4]	5.53916	6.4331	5.18153	10.5206	11.9264	9.84862	5.71793	10.7652	down	1.88271	-0.912811	0.00426376	0.0477675	yes	GO:0005581(collagen),GO:0005201(extracellular matrix structural constituent)	04151(PI3K-Akt signaling pathway),04512(ECM-receptor interaction),04510(Focal adhesion),04974(Protein digestion and absorption),05146(Amoebiasis)
ENSGALT00000015914	chr1	41112	75573	1	ENSGALG00000009783	GOLGB1	golgin B1 [Source:HGNC Symbol;Acc:4429]	15.4959	8.03537	9.48018	22.1744	20.6416	19.3024	11.0038	20.7062	down	1.88172	-0.912055	0.0386767	0.0496975	yes	GO:0005794(Golgi apparatus),GO:0005737(cytoplasm),GO:0005793(endoplasmic reticulum-Golgi intermediate compartment),GO:0005801(cis-Golgi network),GO:0004812(aminoacyl-tRNA ligase activity),GO:0005524(ATP binding),GO:0005515(protein binding)	NA
ENSGALT00000023995	chrZ	13833652	13891525	-1	ENSGALG00000014872	FGF10	Gallus gallus fibroblast growth factor 10 (FGF10), mRNA. [Source:RefSeq mRNA;Acc:NM_204696]	11.8118	8.89134	7.16705	16.3227	19.6701	16.2971	9.29007	17.43	down	1.87619	-0.907807	0.0106627	0.0496441	yes	GO:0000187(activation of MAPK activity),GO:0001656(metanephros development),GO:0001759(organ induction),GO:0001823(mesonephros development),GO:0001974(blood vessel remodeling),GO:0003338(metanephros morphogenesis),GO:0006935(chemotaxis),GO:0007267(cell-cell signaling),GO:0007368(determination of left/right symmetry),GO:0007431(salivary gland development),GO:0007435(salivary gland morphogenesis),G…	04014(Ras signaling pathway),04010(MAPK signaling pathway),04151(PI3K-Akt signaling pathway),04810(Regulation of actin cytoskeleton),05200(Pathways in cancer),05205(Proteoglycans in cancer),05218(Melanoma)
ENSGALT00000009740	chr12	9738594	9754460	1	ENSGALG00000006047	TPRA1	Gallus gallus transmembrane protein, adipocyte asscociated 1 (TPRA1), mRNA. [Source:RefSeq mRNA;Acc:NM_001030599]	10.8464	10.3878	11.9384	23.8917	19.3681	18.8654	11.0575	20.7084	down	1.87279	-0.905187	0.0197669	0.0526872	yes	()	NA
ENSGALT00000034432	chr11	2423734	2424981	-1	ENSGALG00000021345	B3GNT9	UDP-GlcNAc:betaGal beta-1,3-N-acetylglucosaminyltransferase 9 [Source:HGNC Symbol;Acc:28714]	16.3307	9.2724	10.0483	25.5043	22.7761	18.4824	11.8838	22.2543	down	1.87265	-0.905082	0.027005	0.0508204	yes	GO:0006486(protein glycosylation),GO:0005794(Golgi apparatus),GO:0016020(membrane),GO:0016021(integral to membrane),GO:0008378(galactosyltransferase activity),GO:0016740(transferase activity),GO:0016757(transferase activity, transferring glycosyl groups)	NA
ENSGALT00000002870	chr19	4154821	4167499	1	ENSGALG00000001852	LRWD1	leucine-rich repeats and WD repeat domain containing 1 [Source:HGNC Symbol;Acc:21769]	5.01989	6.72972	7.98363	10.7143	13.5843	12.6105	6.57775	12.303	down	1.8704	-0.903349	0.00892486	0.0484782	yes	GO:0006325(chromatin organization),GO:0071169(establishment of protein localization to chromatin),GO:0005634(nucleus),GO:0005664(nuclear origin of replication recognition complex),GO:0005721(centromeric heterochromatin),GO:0031933(telomeric heterochromatin),GO:0003682(chromatin binding),GO:0008327(methyl-CpG binding),GO:0035064(methylated histone residue binding),GO:0005515(protein binding)	NA
ENSGALT00000010062	chr13	13818620	13851076	1	ENSGALG00000006226	KLHL3	kelch-like family member 3 [Source:HGNC Symbol;Acc:6354]	4.97254	4.70558	3.52633	9.94019	7.86666	6.88117	4.40148	8.22934	down	1.86968	-0.902788	0.0334045	0.0503173	yes	GO:0072156(distal tubule morphogenesis),GO:0050801(ion homeostasis),GO:0070294(renal sodium ion absorption),GO:0070936(protein K48-linked ubiquitination),GO:0042787(protein ubiquitination involved in ubiquitin-dependent protein catabolic process),GO:0005829(cytosol),GO:0005515(protein binding)	NA
ENSGALT00000013960	chr3	15382163	15396975	-1	ENSGALG00000008571	PEX6	peroxisomal biogenesis factor 6 [Source:HGNC Symbol;Acc:8859]	4.94871	8.8041	11.065	12.9428	18.8445	14.5774	8.27261	15.4549	down	1.8682	-0.901646	0.045695	0.0500968	yes	GO:0016561(protein import into peroxisome matrix, translocation),GO:0007031(peroxisome organization),GO:0050821(protein stabilization),GO:0006625(protein targeting to peroxisome),GO:0006200(ATP catabolic process),GO:0005777(peroxisome),GO:0005829(cytosol),GO:0005737(cytoplasm),GO:0000166(nucleotide binding),GO:0017111(nucleoside-triphosphatase activity),GO:0005524(ATP binding),GO:0032403(protein …	04146(Peroxisome)
ENSGALT00000023745	chr1	77889106	77896485	-1	ENSGALG00000014723	GABARAPL3	GABA(A) receptors associated protein like 3, pseudogene [Source:HGNC Symbol;Acc:4069]	52.7789	45.8633	40.0115	21.9804	29.0156	23.3976	46.2179	24.7979	up	1.86378	0.898235	0.0128854	0.0513268	yes	GO:0006914(autophagy),GO:0000045(autophagic vacuole assembly),GO:0005622(intracellular),GO:0005776(autophagic vacuole),GO:0005737(cytoplasm),GO:0005515(protein binding)	04140(Regulation of autophagy),04727(GABAergic synapse)
ENSGALT00000025969	chr2	134720381	134723977	1	ENSGALG00000016120	UTP23	UTP23, small subunit (SSU) processome component, homolog (yeast) [Source:HGNC Symbol;Acc:28224]	12.3271	8.88783	11.3865	21.024	19.2247	20.4508	10.8671	20.2332	down	1.86187	-0.89675	0.00393139	0.0486001	yes	GO:0032040(small-subunit processome)	NA
ENSGALT00000001774	chr28	2496338	2502634	-1	ENSGALG00000001171	SEMA6B	sema domain, transmembrane domain (TM), and cytoplasmic domain, (semaphorin) 6B [Source:HGNC Symbol;Acc:10739]	2.70815	3.24921	4.07504	2.014	1.82541	1.55367	3.34414	1.79769	up	1.86024	0.895485	0.0483565	0.0498155	yes	GO:0007275(multicellular organismal development),GO:0016020(membrane),GO:0004872(receptor activity),GO:0030215(semaphorin receptor binding),GO:0005515(protein binding)	04360(Axon guidance)
ENSGALT00000040496	chr27	2764310	2769010	-1	ENSGALG00000000529	LIMD2	Gallus gallus LIM domain containing 2 (LIMD2), mRNA. [Source:RefSeq mRNA;Acc:NM_001006330]	37.759	64.2528	87.2015	102.687	143.184	106.058	63.0711	117.31	down	1.85996	-0.89527	0.0487914	0.049763	yes	GO:0008270(zinc ion binding),GO:0046872(metal ion binding)	NA
ENSGALT00000015273	chr3	14871338	14889265	1	ENSGALG00000008676	RRBP1	Gallus gallus ribosome binding protein 1 homolog 180kDa (dog) (RRBP1), mRNA. [Source:RefSeq mRNA;Acc:NM_001257346]	22.7246	11.0211	18.9593	30.0143	36.4464	31.5262	17.5684	32.6623	down	1.85915	-0.894646	0.0290732	0.0515977	yes	GO:0015031(protein transport),GO:0030176(integral to endoplasmic reticulum membrane),GO:0005783(endoplasmic reticulum)	04141(Protein processing in endoplasmic reticulum)
ENSGALT00000005512	chr7	4155103	4197884	-1	ENSGALG00000003484	BARD1	Gallus gallus BRCA1 associated RING domain 1 (BARD1), mRNA. [Source:RefSeq mRNA;Acc:NM_001031246]	1.32611	2.40525	2.39716	3.74318	3.80326	3.84236	2.04284	3.79627	down	1.85833	-0.894008	0.038561	0.0497271	yes	GO:0046826(negative regulation of protein export from nucleus),GO:0085020(protein K6-linked ubiquitination),GO:0042325(regulation of phosphorylation),GO:0043065(positive regulation of apoptotic process),GO:0043066(negative regulation of apoptotic process),GO:0031436(BRCA1-BARD1 complex),GO:0070531(BRCA1-A complex),GO:0005737(cytoplasm),GO:0005634(nucleus),GO:0008270(zinc ion binding),GO:0046872(m…	NA
ENSGALT00000001050	chr23	1455974	1459771	-1	ENSGALG00000000734	RPA2	Gallus gallus replication protein A2, 32kDa (RPA2), mRNA. [Source:RefSeq mRNA;Acc:NM_001030892]	37.7422	45.6078	32.106	15.1018	20.5397	26.5159	38.4853	20.7191	up	1.85748	0.893346	0.0267559	0.0508858	yes	GO:0003676(nucleic acid binding),GO:0005515(protein binding),GO:0003677(DNA binding)	03030(DNA replication),03420(Nucleotide excision repair),03430(Mismatch repair),03440(Homologous recombination),03460(Fanconi anemia pathway)
ENSGALT00000033106	chr6	26590486	26762219	1	ENSGALG00000008883	TCF7L2	Gallus gallus transcription factor 7-like 2 (T-cell specific, HMG-box) (TCF7L2), mRNA. [Source:RefSeq mRNA;Acc:NM_001206510]	1.74401	3.36424	2.32247	4.07853	5.58514	4.1141	2.4769	4.59259	down	1.85417	-0.890771	0.03695	0.0501764	yes	GO:0016055(Wnt signaling pathway),GO:0006357(regulation of transcription from RNA polymerase II promoter),GO:0007420(brain development),GO:0048699(generation of neurons),GO:0060070(canonical Wnt signaling pathway),GO:0044334(canonical Wnt signaling pathway involved in positive regulation of epithelial to mesenchymal transition),GO:0010909(positive regulation of heparan sulfate proteoglycan biosyn…	04310(Wnt signaling pathway),04390(Hippo signaling pathway),04520(Adherens junction),04916(Melanogenesis),05200(Pathways in cancer),05210(Colorectal cancer),05216(Thyroid cancer),05221(Acute myeloid leukemia),05217(Basal cell carcinoma),05215(Prostate cancer),05213(Endometrial cancer),05412(Arrhythmogenic right ventricular cardiomyopathy (ARVC))
ENSGALT00000011312	chr14	8636416	8660489	1	ENSGALG00000006982	EEF2K	eukaryotic elongation factor-2 kinase [Source:HGNC Symbol;Acc:24615]	29.908	25.6362	18.3527	45.219	44.512	47.1116	24.6323	45.6142	down	1.85181	-0.888934	0.0204678	0.0526	yes	GO:0006468(protein phosphorylation),GO:0031952(regulation of protein autophosphorylation),GO:0046777(protein autophosphorylation),GO:0004674(protein serine/threonine kinase activity),GO:0004686(elongation factor-2 kinase activity),GO:0005509(calcium ion binding),GO:0005516(calmodulin binding),GO:0005524(ATP binding),GO:0016772(transferase activity, transferring phosphorus-containing groups)	NA
ENSGALT00000038024	chr10	19747303	19783016	1	ENSGALG00000008521	TP53BP1	tumor protein p53 binding protein 1 [Source:HGNC Symbol;Acc:11999]	7.10098	4.37904	4.7099	12.4403	8.75062	8.76986	5.39664	9.98694	down	1.85058	-0.887981	0.043357	0.0507957	yes	GO:0006974(cellular response to DNA damage stimulus),GO:0045944(positive regulation of transcription from RNA polymerase II promoter),GO:0006281(DNA repair),GO:0000781(chromosome, telomeric region),GO:0005737(cytoplasm),GO:0005634(nucleus),GO:0000776(kinetochore),GO:0005657(replication fork),GO:0001102(RNA polymerase II activating transcription factor binding),GO:0002039(p53 binding),GO:0035064(m…	NA
ENSGALT00000004856	chr28	3470619	3483167	1	ENSGALG00000003074	HOMER3	homer homolog 3 (Drosophila) [Source:HGNC Symbol;Acc:17514]	8.45456	12.4073	15.5953	20.1357	25.0053	22.2125	12.1524	22.4512	down	1.84748	-0.885555	0.0188282	0.0535708	yes	GO:0005829(cytosol),GO:0014069(postsynaptic density),GO:0045178(basal part of cell),GO:0005515(protein binding),GO:0008022(protein C-terminus binding),GO:0019904(protein domain specific binding)	04724(Glutamatergic synapse)
ENSGALT00000006691	chr8	6145935	6172666	-1	ENSGALG00000004205	SOAT1	O-acyltransferase [Source:UniProtKB/TrEMBL;Acc:E1BTG6]	94.8599	84.5193	70.8425	51.9447	41.1799	42.4206	83.4072	45.1817	up	1.84604	0.884432	0.0171899	0.0550231	yes	GO:0010878(cholesterol storage),GO:0034435(cholesterol esterification),GO:0010742(macrophage derived foam cell differentiation),GO:0034379(very-low-density lipoprotein particle assembly),GO:0042986(positive regulation of amyloid precursor protein biosynthetic process),GO:0033344(cholesterol efflux),GO:0008203(cholesterol metabolic process),GO:0005783(endoplasmic reticulum),GO:0005789(endoplasmic …	00100(Steroid biosynthesis)
ENSGALT00000019482	chr1	49444291	49447731	1	ENSGALG00000011944	PMM1	phosphomannomutase 1 [Source:HGNC Symbol;Acc:9114]	8.38715	7.27546	10.0588	3.78401	6.59552	3.57233	8.57382	4.65062	up	1.84359	0.882515	0.0379552	0.0498423	yes	GO:0008152(metabolic process),GO:0019307(mannose biosynthetic process),GO:0006013(mannose metabolic process),GO:0005737(cytoplasm),GO:0043025(neuronal cell body),GO:0003824(catalytic activity),GO:0004615(phosphomannomutase activity)	00051(Fructose and mannose metabolism),00520(Amino sugar and nucleotide sugar metabolism)
ENSGALT00000040578	chr22	2720660	2732316	1	ENSGALG00000003740	IKBKB	inhibitor of nuclear factor kappa-B kinase subunit beta [Source:RefSeq peptide;Acc:NP_001026568]	11.7207	7.27223	10.6089	15.4726	18.7818	20.1841	9.86729	18.1461	down	1.83902	-0.878937	0.012877	0.05158	yes	GO:0006468(protein phosphorylation),GO:0007252(I-kappaB phosphorylation),GO:0051092(positive regulation of NF-kappaB transcription factor activity),GO:0042501(serine phosphorylation of STAT protein),GO:0071356(cellular response to tumor necrosis factor),GO:0045944(positive regulation of transcription from RNA polymerase II promoter),GO:0001782(B cell homeostasis),GO:0010765(positive regulation of…	04014(Ras signaling pathway),04010(MAPK signaling pathway),04064(NF-kappa B signaling pathway),04668(TNF signaling pathway),04151(PI3K-Akt signaling pathway),04150(mTOR signaling pathway),04210(Apoptosis),04620(Toll-like receptor signaling pathway),04621(NOD-like receptor signaling pathway),04622(RIG-I-like receptor signaling pathway),04623(Cytosolic DNA-sensing pathway),04660(T cell receptor sig…
ENSGALT00000010330	chr10	11717025	11718092	-1	ENSGALG00000006399	MESDC1	mesoderm development candidate 1 [Source:HGNC Symbol;Acc:13519]	10.4957	17.2685	20.001	25.0343	35.7512	26.6733	15.9217	29.1529	down	1.83101	-0.872642	0.0402042	0.0503079	yes	GO:0005515(protein binding)	NA
ENSGALT00000014436	chr6	26590522	26762220	1	ENSGALG00000008883	TCF7L2	Gallus gallus transcription factor 7-like 2 (T-cell specific, HMG-box) (TCF7L2), mRNA. [Source:RefSeq mRNA;Acc:NM_001206510]	1.74861	3.27765	2.30054	4.0893	5.30123	4.01272	2.44227	4.46775	down	1.82934	-0.871326	0.0298091	0.0517509	yes	GO:0016055(Wnt signaling pathway),GO:0006357(regulation of transcription from RNA polymerase II promoter),GO:0007420(brain development),GO:0048699(generation of neurons),GO:0060070(canonical Wnt signaling pathway),GO:0044334(canonical Wnt signaling pathway involved in positive regulation of epithelial to mesenchymal transition),GO:0010909(positive regulation of heparan sulfate proteoglycan biosyn…	04310(Wnt signaling pathway),04390(Hippo signaling pathway),04520(Adherens junction),04916(Melanogenesis),05200(Pathways in cancer),05210(Colorectal cancer),05216(Thyroid cancer),05221(Acute myeloid leukemia),05217(Basal cell carcinoma),05215(Prostate cancer),05213(Endometrial cancer),05412(Arrhythmogenic right ventricular cardiomyopathy (ARVC))
ENSGALT00000029932	chr2	110831287	110878413	1	ENSGALG00000018967	LYN	Gallus gallus v-yes-1 Yamaguchi sarcoma viral related oncogene homolog (LYN), mRNA. [Source:RefSeq mRNA;Acc:NM_001006390]	260.819	205.748	203.612	161.155	75.5639	130.438	223.393	122.386	up	1.82532	0.868148	0.0356711	0.0504461	yes	GO:0001782(B cell homeostasis),GO:0001817(regulation of cytokine production),GO:0001933(negative regulation of protein phosphorylation),GO:0002431(Fc receptor mediated stimulatory signaling pathway),GO:0002513(tolerance induction to self antigen),GO:0002576(platelet degranulation),GO:0002762(negative regulation of myeloid leukocyte differentiation),GO:0002768(immune response-regulating cell surfa…	04064(NF-kappa B signaling pathway),04662(B cell receptor signaling pathway),04664(Fc epsilon RI signaling pathway),04666(Fc gamma R-mediated phagocytosis),04062(Chemokine signaling pathway),04730(Long-term depression),05203(Viral carcinogenesis),05120(Epithelial cell signaling in Helicobacter pylori infection),05169(Epstein-Barr virus infection)
ENSGALT00000020400	chr1	51352165	51355027	-1	ENSGALG00000012487	MPST	Gallus gallus mercaptopyruvate sulfurtransferase (MPST), nuclear gene encoding mitochondrial protein, mRNA. [Source:RefSeq mRNA;Acc:NM_001277377]	15.1166	17.3203	13.8484	6.41895	10.0365	8.93521	15.4284	8.46355	up	1.82293	0.866258	0.00921908	0.0486035	yes	GO:0005739(mitochondrion),GO:0005737(cytoplasm),GO:0005743(mitochondrial inner membrane),GO:0004792(thiosulfate sulfurtransferase activity),GO:0016740(transferase activity)	00920(Sulfur metabolism),00270(Cysteine and methionine metabolism),04122(Sulfur relay system)
ENSGALT00000001946	chr17	8775434	8777838	-1	ENSGALG00000001275	PDCL	phosducin-like [Source:HGNC Symbol;Acc:8770]	22.6565	13.1023	22.578	32.9197	41.223	31.983	19.4456	35.3752	down	1.81919	-0.863297	0.0213219	0.0525353	yes	()	NA
ENSGALT00000001639	chr17	9403856	9424535	1	ENSGALG00000001094	GPR144	G protein-coupled receptor 144 [Source:HGNC Symbol;Acc:18651]	1.76916	2.33688	2.02954	2.94716	4.21465	3.99837	2.04519	3.72006	down	1.81893	-0.863088	0.0355373	0.0505561	yes	GO:0007166(cell surface receptor signaling pathway),GO:0007186(G-protein coupled receptor signaling pathway),GO:0007218(neuropeptide signaling pathway),GO:0005886(plasma membrane),GO:0016020(membrane),GO:0016021(integral to membrane),GO:0004888(transmembrane signaling receptor activity),GO:0004930(G-protein coupled receptor activity)	NA
ENSGALT00000017999	chr2	32527254	32718046	-1	ENSGALG00000011051	SKAP2	src kinase associated phosphoprotein 2 [Source:HGNC Symbol;Acc:15687]	82.794	92.9983	69.9463	55.053	30.9609	49.4221	81.9129	45.1453	up	1.81443	0.859514	0.0206579	0.0523383	yes	GO:0008285(negative regulation of cell proliferation),GO:0005886(plasma membrane),GO:0005737(cytoplasm),GO:0005543(phospholipid binding),GO:0005515(protein binding)	NA
ENSGALT00000000891	chr21	536664	551506	1	ENSGALG00000000627	DNAJC11	DnaJ (Hsp40) homolog, subfamily C, member 11 [Source:HGNC Symbol;Acc:25570]	8.17684	12.7554	11.2456	17.8781	20.9216	19.3239	10.7259	19.3745	down	1.80632	-0.853057	0.00876941	0.0487416	yes	GO:0005739(mitochondrion),GO:0005743(mitochondrial inner membrane)	NA
ENSGALT00000022165	chr2	90153586	90209672	1	ENSGALG00000013624	FAM65B	protein FAM65B [Source:RefSeq peptide;Acc:NP_001012883]	29.0391	29.1884	39.0588	71.3202	56.636	47.4169	32.4288	58.4577	down	1.80265	-0.850119	0.0463329	0.0500312	yes	GO:0005488(binding)	NA
ENSGALT00000044863	chr27	3204183	3219385	-1	ENSGALG00000027311	NGFR	Gallus gallus nerve growth factor receptor (NGFR), mRNA. [Source:RefSeq mRNA;Acc:NM_001146133]	13.9104	17.8649	11.2118	21.9313	29.5076	25.869	14.3291	25.7693	down	1.79839	-0.846709	0.0177596	0.0539562	yes	GO:0007165(signal transduction),GO:0043588(skin development),GO:0007411(axon guidance),GO:0010468(regulation of gene expression),GO:0007417(central nervous system development),GO:0031069(hair follicle morphogenesis),GO:0021675(nerve development),GO:2001235(positive regulation of apoptotic signaling pathway),GO:0008625(extrinsic apoptotic signaling pathway via death domain receptors),GO:0042488(po…	04014(Ras signaling pathway),04151(PI3K-Akt signaling pathway),04060(Cytokine-cytokine receptor interaction),04722(Neurotrophin signaling pathway),05202(Transcriptional misregulation in cancers)
ENSGALT00000018805	chr5	50384785	50394345	1	ENSGALG00000011534	ZFYVE21	Gallus gallus zinc finger, FYVE domain containing 21 (ZFYVE21), transcript variant 2, mRNA. [Source:RefSeq mRNA;Acc:NM_001277521]	77.9951	64.668	58.8383	31.2677	38.8438	42.1226	67.1671	37.4114	up	1.79537	0.844278	0.0175279	0.0537074	yes	GO:0046872(metal ion binding)	NA
ENSGALT00000025596	chr3	78877354	78901407	1	ENSGALG00000015880	HMGN3	Gallus gallus high mobility group nucleosomal binding domain 3 (HMGN3), mRNA. [Source:RefSeq mRNA;Acc:NM_001006412]	17.9757	19.5036	16.9366	27.3634	32.8594	37.436	18.1387	32.5529	down	1.79467	-0.843721	0.0319022	0.0507181	yes	GO:0006357(regulation of transcription from RNA polymerase II promoter),GO:0045944(positive regulation of transcription from RNA polymerase II promoter),GO:0051091(positive regulation of sequence-specific DNA binding transcription factor activity),GO:0061178(regulation of insulin secretion involved in cellular response to glucose stimulus),GO:0000785(chromatin),GO:0005634(nucleus),GO:0005737(cyto…	NA
ENSGALT00000003025	chr26	3742931	3744669	1	ENSGALG00000001956	OLFML3	Gallus gallus olfactomedin-like 3 (OLFML3), mRNA. [Source:RefSeq mRNA;Acc:NM_001040018]	7.32289	8.29747	4.66255	13.3224	13.6923	9.36715	6.76097	12.1273	down	1.79372	-0.842955	0.040879	0.0503613	yes	GO:0007275(multicellular organismal development),GO:0005576(extracellular region),GO:0005515(protein binding)	NA
ENSGALT00000013745	chr5	23244457	23264618	-1	ENSGALG00000008436	CRY2	Gallus gallus cryptochrome 2 (photolyase-like) (CRY2), mRNA. [Source:RefSeq mRNA;Acc:NM_204244]	18.0032	17.0367	21.2786	38.2023	28.5132	34.145	18.7728	33.6202	down	1.79089	-0.84068	0.0200339	0.0522338	yes	GO:0000122(negative regulation of transcription from RNA polymerase II promoter),GO:0006281(DNA repair),GO:0006606(protein import into nucleus),GO:0007623(circadian rhythm),GO:0032515(negative regulation of phosphoprotein phosphatase activity),GO:0042752(regulation of circadian rhythm),GO:2000118(regulation of sodium-dependent phosphate transport),GO:0005576(extracellular region),GO:0005634(nucle…	04710(Circadian rhythm)
ENSGALT00000008027	chr12	5051630	5061707	1	ENSGALG00000005012	novel gene	Uncharacterized protein [Source:UniProtKB/TrEMBL;Acc:F1P220]	5.08323	8.34734	9.23036	15.815	10.4568	14.285	7.55364	13.5189	down	1.78972	-0.839737	0.0453723	0.0501263	yes	()	03040(Spliceosome)
ENSGALT00000015303	chr1	24999077	25013429	-1	ENSGALG00000009393	CAV1	Gallus gallus caveolin 1, caveolae protein, 22kDa (CAV1), mRNA. [Source:RefSeq mRNA;Acc:NM_001105664]	45.7044	51.6605	56.138	84.5962	90.4403	97.9079	51.1676	90.9815	down	1.77811	-0.830342	0.00156824	0.0488881	yes	GO:0000122(negative regulation of transcription from RNA polymerase II promoter),GO:0009267(cellular response to starvation),GO:0010524(positive regulation of calcium ion transport into cytosol),GO:0016050(vesicle organization),GO:0030193(regulation of blood coagulation),GO:0030514(negative regulation of BMP signaling pathway),GO:0031295(T cell costimulation),GO:0032091(negative regulation of pro…	04144(Endocytosis),04510(Focal adhesion),05205(Proteoglycans in cancer),05416(Viral myocarditis),05100(Bacterial invasion of epithelial cells)
ENSGALT00000008243	chr6	15388339	15449462	-1	ENSGALG00000005134	KIAA0913	Gallus gallus KIAA0913 (KIAA0913), mRNA. [Source:RefSeq mRNA;Acc:NM_001195600]	10.8313	11.3808	13.9445	24.0163	19.8824	20.1572	12.0522	21.352	down	1.77163	-0.825074	0.00639886	0.0472988	yes	GO:0008270(zinc ion binding)	NA
ENSGALT00000024450	chr24	322587	362342	-1	ENSGALG00000000939	CDON	cell adhesion associated, oncogene regulated [Source:HGNC Symbol;Acc:17104]	1.41322	1.46594	0.929641	2.67112	2.23272	1.83697	1.2696	2.24694	down	1.7698	-0.823588	0.034631	0.0509866	yes	GO:0045944(positive regulation of transcription from RNA polymerase II promoter),GO:0002088(lens development in camera-type eye),GO:0007224(smoothened signaling pathway),GO:0009952(anterior/posterior pattern specification),GO:0043410(positive regulation of MAPK cascade),GO:0021987(cerebral cortex development),GO:0045666(positive regulation of neuron differentiation),GO:0001708(cell fate specifica…	NA
ENSGALT00000000721	chr26	1510158	1518372	-1	ENSGALG00000000523	STK38	serine/threonine kinase 38 [Source:HGNC Symbol;Acc:17847]	29.4793	17.5646	26.4926	49.4112	36.8691	43.6948	24.5122	43.3251	down	1.76749	-0.821705	0.0209729	0.0525789	yes	GO:0006464(cellular protein modification process),GO:0006468(protein phosphorylation),GO:0016310(phosphorylation),GO:0043407(negative regulation of MAP kinase activity),GO:0035556(intracellular signal transduction),GO:0005634(nucleus),GO:0005737(cytoplasm),GO:0005886(plasma membrane),GO:0043231(intracellular membrane-bounded organelle),GO:0070688(MLL5-L complex),GO:0000166(nucleotide binding),GO:…	NA
ENSGALT00000025366	chrZ	66635458	66700595	-1	ENSGALG00000015729	LPAR1	Gallus gallus lysophosphatidic acid receptor 1 (LPAR1), mRNA. [Source:RefSeq mRNA;Acc:NM_001115082]	9.35374	12.4783	6.8826	16.7722	18.966	14.9062	9.57153	16.8815	down	1.76372	-0.81862	0.0254049	0.0511665	yes	GO:0007165(signal transduction),GO:0007186(G-protein coupled receptor signaling pathway),GO:0043123(positive regulation of I-kappaB kinase/NF-kappaB signaling),GO:0043410(positive regulation of MAPK cascade),GO:0000187(activation of MAPK activity),GO:0032060(bleb assembly),GO:0035025(positive regulation of Rho protein signal transduction),GO:0009986(cell surface),GO:0016021(integral to membrane),…	04151(PI3K-Akt signaling pathway),04080(Neuroactive ligand-receptor interaction),04540(Gap junction)
ENSGALT00000012217	chr5	16827733	16840932	1	ENSGALG00000007555	CCND1	Gallus gallus cyclin D1 (CCND1), mRNA. [Source:RefSeq mRNA;Acc:NM_205381]	134.105	86.5004	78.7277	162.457	184.293	181.169	99.7778	175.973	down	1.76365	-0.818563	0.0342941	0.0506988	yes	GO:0000079(regulation of cyclin-dependent protein serine/threonine kinase activity),GO:0007049(cell cycle),GO:0051301(cell division),GO:0051726(regulation of cell cycle),GO:0070141(response to UV-A),GO:0045737(positive regulation of cyclin-dependent protein kinase activity),GO:0031571(mitotic G1 DNA damage checkpoint),GO:0001934(positive regulation of protein phosphorylation),GO:0042493(response …	04310(Wnt signaling pathway),04390(Hippo signaling pathway),04630(Jak-STAT signaling pathway),04151(PI3K-Akt signaling pathway),04110(Cell cycle),04115(p53 signaling pathway),04510(Focal adhesion),04917(Prolactin signaling pathway),05200(Pathways in cancer),05206(MicroRNAs in cancer),05205(Proteoglycans in cancer),05203(Viral carcinogenesis),05210(Colorectal cancer),05212(Pancreatic cancer),05214…
ENSGALT00000018727	chr2	41021645	41030796	-1	ENSGALG00000011490	CMTM6	CKLF-like MARVEL transmembrane domain containing 6 [Source:HGNC Symbol;Acc:19177]	20.844	19.0857	17.1487	7.07318	11.3561	13.9714	19.0261	10.8002	up	1.76164	0.816922	0.0355486	0.0503722	yes	GO:0016020(membrane)	NA
ENSGALT00000026348	chr2	138077064	138193553	-1	ENSGALG00000016333	MTSS1	Gallus gallus metastasis suppressor 1 (MTSS1), mRNA. [Source:RefSeq mRNA;Acc:NM_001030954]	38.5816	30.9437	30.3485	19.5984	18.7274	18.3715	33.2913	18.8991	up	1.76153	0.816826	0.0303112	0.0511367	yes	GO:0007165(signal transduction),GO:0030036(actin cytoskeleton organization),GO:0046847(filopodium assembly),GO:0007015(actin filament organization),GO:0030041(actin filament polymerization),GO:0015629(actin cytoskeleton),GO:0005737(cytoplasm),GO:0003779(actin binding),GO:0003785(actin monomer binding),GO:0005102(receptor binding),GO:0008093(cytoskeletal adaptor activity),GO:0017124(SH3 domain bin…	NA
ENSGALT00000036496	chr1	165513387	165674975	1	ENSGALG00000016959	DGKH	diacylglycerol kinase, eta [Source:HGNC Symbol;Acc:2854]	6.36035	3.82722	4.78737	8.29204	8.55786	9.51896	4.99165	8.78962	down	1.76087	-0.816284	0.0200229	0.0523957	yes	GO:0007205(protein kinase C-activating G-protein coupled receptor signaling pathway),GO:0008152(metabolic process),GO:0035556(intracellular signal transduction),GO:0051259(protein oligomerization),GO:0005768(endosome),GO:0031965(nuclear membrane),GO:0005737(cytoplasm),GO:0005634(nucleus),GO:0003951(NAD+ kinase activity),GO:0004143(diacylglycerol kinase activity),GO:0005543(phospholipid binding)	00561(Glycerolipid metabolism),00564(Glycerophospholipid metabolism),04070(Phosphatidylinositol signaling system)
ENSGALT00000043625	chr9	23119142	23147022	-1	ENSGALG00000027591	TSC22D2	TSC22 domain family, member 2 [Source:HGNC Symbol;Acc:29095]	6.81346	11.401	13.8412	19.2717	20.6638	16.5017	10.6852	18.8124	down	1.7606	-0.816068	0.0377467	0.0500266	yes	GO:0006355(regulation of transcription, DNA-dependent),GO:0006970(response to osmotic stress),GO:0003700(sequence-specific DNA binding transcription factor activity)	NA
ENSGALT00000042673	chr28	976369	983104	-1	ENSGALG00000027961	novel gene	Gallus gallus mucosa associated lymphoid tissue lymphoma translocation gene 1-like (LOC429451), mRNA. [Source:RefSeq mRNA;Acc:NM_001031574]	5.79428	8.01621	11.7177	14.0065	17.2006	13.7303	8.5094	14.9791	down	1.7603	-0.815825	0.0429765	0.0507647	yes	GO:0006508(proteolysis),GO:0004197(cysteine-type endopeptidase activity),GO:0005515(protein binding)	04064(NF-kappa B signaling pathway),04660(T cell receptor signaling pathway),04662(B cell receptor signaling pathway),05152(Tuberculosis)
ENSGALT00000046035	chr6	23801103	23802752	-1	ENSGALG00000025780	ITPRIP	inositol 1,4,5-trisphosphate receptor interacting protein [Source:HGNC Symbol;Acc:29370]	71.9503	65.8228	50.7538	46.9402	28.8831	31.3731	62.8423	35.7322	up	1.7587	0.814513	0.0333132	0.050498	yes	GO:0006469(negative regulation of protein kinase activity),GO:1902042(negative regulation of extrinsic apoptotic signaling pathway via death domain receptors),GO:0005515(protein binding),GO:0004860(protein kinase inhibitor activity)	NA
ENSGALT00000032448	chr5	57553242	57564951	1	ENSGALG00000012244	KLHDC2	Gallus gallus kelch domain containing 2 (KLHDC2), mRNA. [Source:RefSeq mRNA;Acc:NM_001012590]	24.0293	24.5375	28.6909	51.6703	41.5128	42.6868	25.7526	45.29	down	1.75866	-0.814476	0.0137925	0.0534551	yes	GO:0005515(protein binding)	NA
ENSGALT00000023169	chr1	74996782	75063854	-1	ENSGALG00000014342	TEAD4	Gallus gallus TEA domain family member 4 (TEAD4), transcript variant 3, mRNA. [Source:RefSeq mRNA;Acc:NM_001001338]	4.84104	10.0928	10.1604	12.3487	15.6196	16.1273	8.36475	14.6985	down	1.7572	-0.813276	0.0480695	0.0498782	yes	GO:0006355(regulation of transcription, DNA-dependent),GO:0035329(hippo signaling),GO:0006357(regulation of transcription from RNA polymerase II promoter),GO:0045944(positive regulation of transcription from RNA polymerase II promoter),GO:0001701(in utero embryonic development),GO:0007566(embryo implantation),GO:0001825(blastocyst formation),GO:0001708(cell fate specification),GO:0001830(trophect…	04011(MAPK signaling pathway - yeast),04390(Hippo signaling pathway),04391(Hippo signaling pathway -fly)
ENSGALT00000026131	chr2	141665331	141689879	-1	ENSGALG00000016210	ST3GAL1	Gallus gallus ST3 beta-galactoside alpha-2,3-sialyltransferase 1 (ST3GAL1), mRNA. [Source:RefSeq mRNA;Acc:NM_205217]	20.2256	12.3884	11.4422	25.1542	24.6843	27.513	14.6854	25.7839	down	1.75575	-0.812084	0.0469762	0.0501219	yes	GO:0006468(protein phosphorylation),GO:0006486(protein glycosylation),GO:0097503(sialylation),GO:0005576(extracellular region),GO:0005794(Golgi apparatus),GO:0016020(membrane),GO:0016021(integral to membrane),GO:0030173(integral to Golgi membrane),GO:0032580(Golgi cisterna membrane),GO:0003836(beta-galactoside (CMP) alpha-2,3-sialyltransferase activity),GO:0008373(sialyltransferase activity),GO:0…	00512(Mucin type O-glycan biosynthesis),00533(Glycosaminoglycan biosynthesis - keratan sulfate),00603(Glycosphingolipid biosynthesis - globo series),00604(Glycosphingolipid biosynthesis - ganglio series)
ENSGALT00000005471	chr18	6706867	6718503	1	ENSGALG00000003454	ZNF207	zinc finger protein 207 [Source:HGNC Symbol;Acc:12998]	39.3898	40.1804	30.8334	63.8806	65.0809	64.8694	36.8012	64.6103	down	1.75566	-0.81201	0.0104923	0.0494931	yes	GO:0005634(nucleus),GO:0046872(metal ion binding),GO:0008201(heparin binding)	NA
ENSGALT00000044969	chr15	10082422	10090719	-1	ENSGALG00000027369	DGCR6	Protein DGCR6 [Source:UniProtKB/Swiss-Prot;Acc:O73770]	5.61454	6.42001	7.09143	11.0417	11.6873	10.8345	6.37533	11.1878	down	1.75486	-0.811357	0.00161057	0.0481158	yes	()	NA
ENSGALT00000017083	chr6	34494571	34496310	1	ENSGALG00000010491	PWWP2B	PWWP domain containing 2B [Source:HGNC Symbol;Acc:25150]	23.4262	26.9486	29.8666	15.6098	19.3431	10.8739	26.7471	15.2756	up	1.75097	0.808157	0.0230113	0.0506108	yes	()	NA
ENSGALT00000026917	chr1	128072873	128200091	1	ENSGALG00000016681	DHRSX	dehydrogenase/reductase (SDR family) X-linked [Source:HGNC Symbol;Acc:18399]	10.628	13.4592	14.2785	6.50906	8.58906	6.81462	12.7886	7.30425	up	1.75084	0.808048	0.0201873	0.0524431	yes	GO:0008152(metabolic process),GO:0055114(oxidation-reduction process),GO:0016491(oxidoreductase activity)	NA
ENSGALT00000021384	chr1	63429485	63435977	1	ENSGALG00000013098	MGST1	Gallus gallus microsomal glutathione S-transferase 1 (MGST1), mRNA. [Source:RefSeq mRNA;Acc:NM_001135550]	52.4424	65.6904	63.5571	29.197	33.8601	40.8251	60.5633	34.6274	up	1.749	0.806529	0.00896836	0.0479874	yes	GO:0006749(glutathione metabolic process),GO:0055114(oxidation-reduction process),GO:0071449(cellular response to lipid hydroperoxide),GO:0005739(mitochondrion),GO:0005743(mitochondrial inner membrane),GO:0004364(glutathione transferase activity),GO:0004602(glutathione peroxidase activity),GO:0005515(protein binding)	00480(Glutathione metabolism),00980(Metabolism of xenobiotics by cytochrome P450),00982(Drug metabolism - cytochrome P450),05204(Chemical carcinogenesis)
ENSGALT00000009953	chr6	17984757	18098872	1	ENSGALG00000006165	WDFY4	WDFY family member 4 [Source:HGNC Symbol;Acc:29323]	57.7636	31.7935	35.5244	86.3852	70.9711	60.9905	41.6938	72.7823	down	1.74564	-0.803753	0.047593	0.0502565	yes	GO:0038032(termination of G-protein coupled receptor signaling pathway),GO:0005515(protein binding),GO:0005488(binding)	NA
ENSGALT00000003145	chr23	3723614	3732322	-1	ENSGALG00000002021	ZC3H12A	zinc finger CCCH-type containing 12A [Source:HGNC Symbol;Acc:26259]	50.0562	56.1362	59.4562	32.623	33.3431	28.9279	55.2162	31.6313	up	1.74562	0.803737	0.00498673	0.0464349	yes	GO:0010508(positive regulation of autophagy),GO:0010628(positive regulation of gene expression),GO:0010629(negative regulation of gene expression),GO:0010884(positive regulation of lipid storage),GO:0032088(negative regulation of NF-kappaB transcription factor activity),GO:0032715(negative regulation of interleukin-6 production),GO:0032720(negative regulation of tumor necrosis factor production),…	NA
ENSGALT00000032690	chr5	15087950	15107470	-1	ENSGALG00000006868	EFCAB4A	EF-hand calcium binding domain 4A [Source:HGNC Symbol;Acc:28703]	4.92472	5.28768	7.74338	11.2014	10.7245	9.36502	5.98526	10.4303	down	1.74266	-0.801295	0.0189626	0.0537398	yes	GO:0034613(cellular protein localization),GO:0002115(store-operated calcium entry),GO:2001256(regulation of store-operated calcium entry),GO:0005737(cytoplasm),GO:0005509(calcium ion binding),GO:0005515(protein binding)	NA
ENSGALT00000020806	chr1	54927408	55004223	-1	ENSGALG00000012751	STAB2	stabilin 2 [Source:HGNC Symbol;Acc:18629]	27.8908	22.8219	29.4738	56.2658	44.937	38.4877	26.7288	46.5635	down	1.74207	-0.800803	0.0479091	0.0499285	yes	GO:0007155(cell adhesion),GO:0042742(defense response to bacterium),GO:0005887(integral to plasma membrane),GO:0005737(cytoplasm),GO:0005540(hyaluronic acid binding),GO:0005515(protein binding),GO:0005509(calcium ion binding),GO:0005041(low-density lipoprotein receptor activity),GO:0030169(low-density lipoprotein particle binding),GO:0005044(scavenger receptor activity)	NA
ENSGALT00000019581	chr4	54343365	54387579	1	ENSGALG00000011998	SEC24D	SEC24 family member D [Source:HGNC Symbol;Acc:10706]	18.7247	12.9238	14.1531	32.1227	23.0766	24.5489	15.2672	26.5827	down	1.74116	-0.80005	0.0350725	0.050802	yes	GO:0006810(transport),GO:0006886(intracellular protein transport),GO:0006888(ER to Golgi vesicle-mediated transport),GO:0015031(protein transport),GO:0030127(COPII vesicle coat),GO:0008270(zinc ion binding)	04141(Protein processing in endoplasmic reticulum)
ENSGALT00000009586	chr14	6562460	6601951	-1	ENSGALG00000005962	ARHGAP17	Rho GTPase activating protein 17 [Source:HGNC Symbol;Acc:18239]	20.613	15.8661	19.2262	37.905	29.1695	29.8444	18.5684	32.3063	down	1.73985	-0.798963	0.0229007	0.0513118	yes	GO:0007165(signal transduction),GO:0005622(intracellular),GO:0005737(cytoplasm),GO:0005515(protein binding)	NA
ENSGALT00000020152	chr2	51738228	51742886	-1	ENSGALG00000012333	C7orf25	chromosome 7 open reading frame 25 [Source:HGNC Symbol;Acc:21703]	5.11508	5.31107	6.51987	10.0595	9.46453	9.92996	5.64868	9.81798	down	1.7381	-0.797514	0.00491026	0.0463244	yes	()	NA
ENSGALT00000002770	chr17	7921458	7960027	-1	ENSGALG00000001797	GPSM1	G-protein signaling modulator 1 [Source:HGNC Symbol;Acc:17858]	6.81072	7.35712	7.96049	14.6102	12.1621	11.6482	7.37611	12.8068	down	1.73626	-0.795982	0.0177604	0.0537309	yes	GO:0008277(regulation of G-protein coupled receptor protein signaling pathway),GO:0005634(nucleus),GO:0005794(Golgi apparatus),GO:0005092(GDP-dissociation inhibitor activity),GO:0030695(GTPase regulator activity),GO:0005515(protein binding)	05030(Cocaine addiction)
ENSGALT00000001317	chr23	1810793	1819666	1	ENSGALG00000000895	NUDC	Gallus gallus nuclear distribution C homolog (A. nidulans) (NUDC), mRNA. [Source:RefSeq mRNA;Acc:NM_001006311]	31.7098	27.9615	40.6356	54.4245	55.7396	63.6467	33.4356	57.9369	down	1.73279	-0.793097	0.00791549	0.0489259	yes	GO:0005737(cytoplasm),GO:0005515(protein binding)	NA
ENSGALT00000046057	chr7	4154100	4197932	-1	ENSGALG00000003484	BARD1	Gallus gallus BRCA1 associated RING domain 1 (BARD1), mRNA. [Source:RefSeq mRNA;Acc:NM_001031246]	2.11907	3.06366	3.4377	5.88342	4.3784	4.66637	2.87348	4.97607	down	1.73172	-0.792208	0.0265932	0.0508462	yes	GO:0046826(negative regulation of protein export from nucleus),GO:0085020(protein K6-linked ubiquitination),GO:0042325(regulation of phosphorylation),GO:0043065(positive regulation of apoptotic process),GO:0043066(negative regulation of apoptotic process),GO:0031436(BRCA1-BARD1 complex),GO:0070531(BRCA1-A complex),GO:0005737(cytoplasm),GO:0005634(nucleus),GO:0008270(zinc ion binding),GO:0046872(m…	NA
ENSGALT00000026711	chr1	121271446	121287881	-1	ENSGALG00000016552	novel gene	Uncharacterized protein [Source:UniProtKB/TrEMBL;Acc:F1NHR6]	13.0712	9.21643	9.94313	16.2242	21.4115	18.1258	10.7436	18.5872	down	1.73007	-0.790833	0.0169322	0.0562055	yes	GO:0005634(nucleus),GO:0000166(nucleotide binding),GO:0003676(nucleic acid binding),GO:0003723(RNA binding),GO:0046872(metal ion binding)	NA
ENSGALT00000008721	chr2	3216850	3246773	-1	ENSGALG00000005430	ALS2CL	ALS2 C-terminal like [Source:HGNC Symbol;Acc:20605]	9.0226	8.5687	10.0144	4.83117	5.52713	5.61323	9.20191	5.32384	up	1.72843	0.789466	0.00335903	0.0472241	yes	GO:0035023(regulation of Rho protein signal transduction),GO:0007032(endosome organization),GO:0008104(protein localization),GO:0016023(cytoplasmic membrane-bounded vesicle),GO:0005089(Rho guanyl-nucleotide exchange factor activity),GO:0042802(identical protein binding),GO:0005515(protein binding),GO:0017137(Rab GTPase binding)	NA
ENSGALT00000009909	chrLGE22C19W28_E50C23	154787	213469	-1	ENSGALG00000006139	DIP2B	DIP2 disco-interacting protein 2 homolog B (Drosophila) [Source:HGNC Symbol;Acc:29284]	30.4146	21.2301	25.3542	46.1095	51.429	35.484	25.6663	44.3408	down	1.72759	-0.788763	0.0372247	0.0500753	yes	GO:0008152(metabolic process),GO:0005634(nucleus),GO:0003824(catalytic activity),GO:0008134(transcription factor binding)	NA
ENSGALT00000013430	chr15	12207814	12219746	1	ENSGALG00000008250	TBX3	Gallus gallus T-box 3 (TBX3), mRNA. [Source:RefSeq mRNA;Acc:NM_001270878]	44.1856	36.4301	30.0088	16.4963	26.7661	20.7968	36.8748	21.3531	up	1.72691	0.788193	0.0423227	0.0507447	yes	GO:0006351(transcription, DNA-templated),GO:0006355(regulation of transcription, DNA-dependent),GO:0046884(follicle-stimulating hormone secretion),GO:0032275(luteinizing hormone secretion),GO:0035136(forelimb morphogenesis),GO:0030540(female genitalia development),GO:0008595(anterior/posterior axis specification, embryo),GO:0048332(mesoderm morphogenesis),GO:0090398(cellular senescence),GO:000756…	NA
ENSGALT00000014594	chr9	16984938	17003984	-1	ENSGALG00000008972	MFN1	Gallus gallus mitofusin 1 (MFN1), nuclear gene encoding mitochondrial protein, mRNA. [Source:RefSeq mRNA;Acc:NM_001012931]	35.3241	27.8997	36.9536	21.5229	15.4882	21.0181	33.3925	19.3431	up	1.72633	0.787705	0.018167	0.0531662	yes	GO:0006184(GTP catabolic process),GO:0008053(mitochondrial fusion),GO:0005741(mitochondrial outer membrane),GO:0016021(integral to membrane),GO:0005739(mitochondrion),GO:0003924(GTPase activity),GO:0005525(GTP binding),GO:0005515(protein binding)	NA
ENSGALT00000002839	chr28	1420886	1434153	-1	ENSGALG00000001836	PIAS4	protein inhibitor of activated STAT, 4 [Source:HGNC Symbol;Acc:17002]	2.04144	3.77845	3.55666	5.45117	6.19923	4.53439	3.12552	5.39493	down	1.72609	-0.787509	0.0363435	0.0503056	yes	GO:0033235(positive regulation of protein sumoylation),GO:0045892(negative regulation of transcription, DNA-dependent),GO:0000122(negative regulation of transcription from RNA polymerase II promoter),GO:0032088(negative regulation of NF-kappaB transcription factor activity),GO:1902231(positive regulation of intrinsic apoptotic signaling pathway in response to DNA damage),GO:1902174(positive regul…	04120(Ubiquitin mediated proteolysis),04630(Jak-STAT signaling pathway),04064(NF-kappa B signaling pathway)
ENSGALT00000045338	chr2	131277175	131326213	-1	ENSGALG00000026873	RSPO2	R-spondin 2 [Source:HGNC Symbol;Acc:28583]	1.21895	1.94654	1.58902	2.53822	2.7911	2.8767	1.58484	2.73534	down	1.72595	-0.787388	0.0174866	0.0540428	yes	GO:0035116(embryonic hindlimb morphogenesis),GO:0030282(bone mineralization),GO:0035115(embryonic forelimb morphogenesis),GO:0001649(osteoblast differentiation),GO:0090263(positive regulation of canonical Wnt signaling pathway),GO:0060441(epithelial tube branching involved in lung morphogenesis),GO:0060535(trachea cartilage morphogenesis),GO:0060437(lung growth),GO:0005576(extracellular region),G…	NA
ENSGALT00000001165	chr11	284289	289201	1	ENSGALG00000000804	SLC7A6OS	solute carrier family 7, member 6 opposite strand [Source:HGNC Symbol;Acc:25807]	6.65494	8.46248	6.33306	13.1648	13.3912	10.456	7.15016	12.3373	down	1.72546	-0.786981	0.0138443	0.0530822	yes	()	NA
ENSGALT00000021805	chr2	128668725	128710037	-1	ENSGALG00000013363	NCALD	Neurocalcin-delta [Source:UniProtKB/Swiss-Prot;Acc:P62758]	8.85265	5.00316	7.59099	11.47	12.2852	13.2356	7.14893	12.3303	down	1.72477	-0.786403	0.0291129	0.0515407	yes	GO:0007165(signal transduction),GO:0019722(calcium-mediated signaling),GO:0003073(regulation of systemic arterial blood pressure),GO:0005622(intracellular),GO:0005578(proteinaceous extracellular matrix),GO:0005509(calcium ion binding),GO:0015631(tubulin binding),GO:0030276(clathrin binding),GO:0046872(metal ion binding)	NA
ENSGALT00000018812	chr2	41971952	41990903	-1	ENSGALG00000011539	EAF1	ELL associated factor 1 [Source:HGNC Symbol;Acc:20907]	56.2456	42.2677	39.1051	33.7584	20.9675	25.0783	45.8728	26.6014	up	1.72445	0.786138	0.0463495	0.0499738	yes	GO:0006355(regulation of transcription, DNA-dependent),GO:0032783(ELL-EAF complex),GO:0005515(protein binding)	NA
ENSGALT00000019389	chr2	43675442	43682092	-1	ENSGALG00000011883	CLEC3B	Gallus gallus C-type lectin domain family 3, member B (CLEC3B), mRNA. [Source:RefSeq mRNA;Acc:NM_204666]	124.871	132.358	101.844	186.242	180.025	250.059	119.691	205.442	down	1.71644	-0.779418	0.0463884	0.0499407	yes	GO:0030282(bone mineralization),GO:0071310(cellular response to organic substance),GO:0071560(cellular response to transforming growth factor beta stimulus),GO:0001501(skeletal system development),GO:0001652(granular component),GO:0005615(extracellular space),GO:0005737(cytoplasm),GO:0005509(calcium ion binding),GO:0008201(heparin binding),GO:0030246(carbohydrate binding),GO:0036143(kringle domai…	NA
ENSGALT00000006583	chr7	5701702	5823487	1	ENSGALG00000004140	SH3BP4	SH3-domain binding protein 4 [Source:HGNC Symbol;Acc:10826]	7.43312	12.3428	9.03898	15.9453	17.9835	15.4922	9.60496	16.4737	down	1.71512	-0.778312	0.0239831	0.0510264	yes	GO:0008285(negative regulation of cell proliferation),GO:0010508(positive regulation of autophagy),GO:0030308(negative regulation of cell growth),GO:0032007(negative regulation of TOR signaling),GO:0034260(negative regulation of GTPase activity),GO:0050790(regulation of catalytic activity),GO:0061462(protein localization to lysosome),GO:0071230(cellular response to amino acid stimulus),GO:0005737…	NA
ENSGALT00000042988	chr15	12572529	12579566	-1	ENSGALG00000008317	SDSL	Gallus gallus serine dehydratase-like (SDSL), mRNA. [Source:RefSeq mRNA;Acc:NM_001198643]	1.62241	1.18987	1.26899	0.709458	0.83305	0.837701	1.36042	0.793403	up	1.71467	0.777931	0.0406121	0.0503787	yes	GO:0005739(mitochondrion),GO:0006520(cellular amino acid metabolic process),GO:0030170(pyridoxal phosphate binding)	NA
ENSGALT00000036884	chr3	98778414	98780948	1	ENSGALG00000016462	MYCN	Gallus gallus v-myc myelocytomatosis viral related oncogene, neuroblastoma derived (MYCN), mRNA. [Source:RefSeq mRNA;Acc:NM_001031091]	3.90844	4.28703	2.2233	5.03113	7.00176	5.8188	3.47293	5.95056	down	1.71342	-0.776875	0.0447027	0.050081	yes	GO:0006355(regulation of transcription, DNA-dependent),GO:0005634(nucleus),GO:0003700(sequence-specific DNA binding transcription factor activity),GO:0046983(protein dimerization activity),GO:0005515(protein binding)	05202(Transcriptional misregulation in cancers)
ENSGALT00000014573	chr3	8543454	8573143	1	ENSGALG00000008962	MSH2	mutS homolog 2 [Source:HGNC Symbol;Acc:7325]	3.29376	5.03504	4.98517	7.38622	7.1962	8.15756	4.43799	7.57999	down	1.70798	-0.772291	0.0165884	0.0566377	yes	GO:0001701(in utero embryonic development),GO:0002204(somatic recombination of immunoglobulin genes involved in immune response),GO:0006119(oxidative phosphorylation),GO:0006200(ATP catabolic process),GO:0006281(DNA repair),GO:0006298(mismatch repair),GO:0006301(postreplication repair),GO:0006302(double-strand break repair),GO:0006915(apoptotic process),GO:0006974(cellular response to DNA damage …	03430(Mismatch repair),05200(Pathways in cancer),05210(Colorectal cancer)
ENSGALT00000027462	chr1	168132350	168158284	-1	ENSGALG00000017000	RCBTB2	regulator of chromosome condensation (RCC1) and BTB (POZ) domain containing protein 2 [Source:HGNC Symbol;Acc:1914]	11.9419	6.95833	7.28788	14.7358	13.0122	16.9777	8.72935	14.9086	down	1.70787	-0.772195	0.0405136	0.0503435	yes	GO:0001669(acrosomal vesicle),GO:0005515(protein binding)	NA
ENSGALT00000012698	chr18	10885631	10890082	1	ENSGALG00000007822	ICT1	immature colon carcinoma transcript 1 [Source:HGNC Symbol;Acc:5359]	9.80187	7.67349	6.80242	4.97275	3.95707	5.31661	8.09259	4.74881	up	1.70413	0.769036	0.0466032	0.0500217	yes	GO:0006415(translational termination),GO:0070126(mitochondrial translational termination),GO:0005739(mitochondrion),GO:0005762(mitochondrial large ribosomal subunit),GO:0003747(translation release factor activity),GO:0004045(aminoacyl-tRNA hydrolase activity),GO:0016150(translation release factor activity, codon nonspecific)	NA
ENSGALT00000003002	chr26	3719015	3738838	1	ENSGALG00000001939	HIPK1	homeodomain interacting protein kinase 1 [Source:HGNC Symbol;Acc:19006]	27.2536	24.6768	23.6423	44.2138	44.1473	40.4195	25.1909	42.9269	down	1.70406	-0.768979	0.000480968	0.0431068	yes	GO:0006468(protein phosphorylation),GO:0009103(lipopolysaccharide biosynthetic process),GO:0072577(endothelial cell apoptotic process),GO:0097191(extrinsic apoptotic signaling pathway),GO:0010803(regulation of tumor necrosis factor-mediated signaling pathway),GO:0016926(protein desumoylation),GO:0007224(smoothened signaling pathway),GO:0009952(anterior/posterior pattern specification),GO:0048596(…	NA
ENSGALT00000002361	chr15	567194	624314	-1	ENSGALG00000001554	PPIL2	Gallus gallus peptidylprolyl isomerase (cyclophilin)-like 2 (PPIL2), mRNA. [Source:RefSeq mRNA;Acc:NM_001030653]	13.4423	17.3384	14.5181	30.215	24.7874	22.1656	15.0996	25.7227	down	1.70353	-0.76853	0.0292075	0.0515808	yes	GO:0000413(protein peptidyl-prolyl isomerization),GO:0006457(protein folding),GO:0016567(protein ubiquitination),GO:0000209(protein polyubiquitination),GO:0000151(ubiquitin ligase complex),GO:0005634(nucleus),GO:0003755(peptidyl-prolyl cis-trans isomerase activity),GO:0004842(ubiquitin-protein ligase activity),GO:0016853(isomerase activity),GO:0034450(ubiquitin-ubiquitin ligase activity),GO:00055…	04120(Ubiquitin mediated proteolysis)
ENSGALT00000037701	chr4	56144859	56302313	1	ENSGALG00000012036	CAMK2D	calcium/calmodulin-dependent protein kinase type II delta chain [Source:RefSeq peptide;Acc:NP_001034389]	100.525	88.002	69.9409	65.8955	34.8503	50.9898	86.1559	50.5785	up	1.70341	0.768424	0.0478304	0.0500648	yes	GO:0006468(protein phosphorylation),GO:0060341(regulation of cellular localization),GO:1901897(regulation of relaxation of cardiac muscle),GO:0010613(positive regulation of cardiac muscle hypertrophy),GO:0018105(peptidyl-serine phosphorylation),GO:0018107(peptidyl-threonine phosphorylation),GO:0006816(calcium ion transport),GO:0046777(protein autophosphorylation),GO:0060048(cardiac muscle contrac…	04012(ErbB signaling pathway),04310(Wnt signaling pathway),04066(HIF-1 signaling pathway),04020(Calcium signaling pathway),04114(Oocyte meiosis),04911(Insulin secretion),04912(GnRH signaling pathway),04916(Melanogenesis),04971(Gastric acid secretion),04725(Cholinergic synapse),04728(Dopaminergic synapse),04720(Long-term potentiation),04722(Neurotrophin signaling pathway),04745(Phototransduction -…
ENSGALT00000005964	chr17	6221055	6233924	1	ENSGALG00000003757	POMT1	Gallus gallus protein-O-mannosyltransferase 1 (POMT1), mRNA. [Source:RefSeq mRNA;Acc:NM_001030685]	3.31871	5.08028	4.0718	6.82928	8.45244	5.946	4.15693	7.07591	down	1.7022	-0.767398	0.0365501	0.0501079	yes	GO:0006493(protein O-linked glycosylation),GO:0097502(mannosylation),GO:0030198(extracellular matrix organization),GO:0005789(endoplasmic reticulum membrane),GO:0016020(membrane),GO:0001669(acrosomal vesicle),GO:0016529(sarcoplasmic reticulum),GO:0000030(mannosyltransferase activity)	00514(Other types of O-glycan biosynthesis)
ENSGALT00000039435	chr3	11131168	11137396	-1	ENSGALG00000008760	WDR92	Gallus gallus WD repeat domain 92 (WDR92), mRNA. [Source:RefSeq mRNA;Acc:NM_001079744]	3.95698	3.90974	4.46651	7.94885	6.5895	6.40975	4.11108	6.9827	down	1.69851	-0.764268	0.0178719	0.0533924	yes	GO:0005515(protein binding)	NA
ENSGALT00000044451	chrLGE22C19W28_E50C23	378550	397362	1	ENSGALG00000006311	HDAC7	Gallus gallus histone deacetylase 7 (HDAC7), mRNA. [Source:RefSeq mRNA;Acc:NM_001031402]	12.7088	11.6277	10.7653	19.1187	22.5315	17.8827	11.7006	19.8443	down	1.696	-0.76214	0.0169768	0.0558364	yes	GO:0016568(chromatin modification),GO:0016575(histone deacetylation),GO:0090050(positive regulation of cell migration involved in sprouting angiogenesis),GO:0045668(negative regulation of osteoblast differentiation),GO:0032703(negative regulation of interleukin-2 production),GO:0000122(negative regulation of transcription from RNA polymerase II promoter),GO:0001570(vasculogenesis),GO:0007043(cell…	05203(Viral carcinogenesis),05034(Alcoholism)
ENSGALT00000003900	chr10	466729	500501	1	ENSGALG00000002471	ZNF592	zinc finger protein 592 [Source:HGNC Symbol;Acc:28986]	11.149	6.35733	9.95759	18.1757	14.176	14.2038	9.15464	15.5185	down	1.69515	-0.761414	0.0317424	0.0511445	yes	GO:0046872(metal ion binding),GO:0005515(protein binding)	NA
ENSGALT00000009976	chr4	4161930	4176418	1	ENSGALG00000006180	SLC9A6	solute carrier family 9, subfamily A (NHE6, cation proton antiporter 6), member 6 [Source:HGNC Symbol;Acc:11079]	7.16409	10.426	12.3164	18.0823	17.1121	15.4891	9.96882	16.8945	down	1.69473	-0.761057	0.0268992	0.0507546	yes	GO:0006810(transport),GO:0006811(ion transport),GO:0006812(cation transport),GO:0006814(sodium ion transport),GO:0006885(regulation of pH),GO:0055085(transmembrane transport),GO:0016020(membrane),GO:0016021(integral to membrane),GO:0055038(recycling endosome membrane),GO:0031901(early endosome membrane),GO:0005789(endoplasmic reticulum membrane),GO:0005886(plasma membrane),GO:0005739(mitochondrio…	NA
ENSGALT00000003413	chr18	4579533	4593316	1	ENSGALG00000002179	FBF1	Gallus gallus Fas (TNFRSF6) binding factor 1 (FBF1), mRNA. [Source:RefSeq mRNA;Acc:NM_001114630]	6.9467	7.5464	8.16127	11.8674	13.6143	12.895	7.55146	12.7922	down	1.69401	-0.760441	0.00173506	0.0376981	yes	GO:0043297(apical junction assembly),GO:0090162(establishment of epithelial cell polarity),GO:0042384(cilium assembly),GO:0000922(spindle pole),GO:0045095(keratin filament),GO:0005814(centriole),GO:0043296(apical junction complex),GO:0000166(nucleotide binding),GO:0005515(protein binding)	NA
ENSGALT00000012713	chr20	13338400	13344982	1	ENSGALG00000020878	ZFP64	Gallus gallus zinc finger protein 64 homolog (mouse) (ZFP64), mRNA. [Source:RefSeq mRNA;Acc:NM_001030869]	11.1807	17.634	18.3231	27.7162	27.5591	24.5745	15.7126	26.6166	down	1.69397	-0.760405	0.0259292	0.0512155	yes	GO:0003676(nucleic acid binding),GO:0046872(metal ion binding)	NA
ENSGALT00000008583	chr20	8368251	8377966	-1	ENSGALG00000005352	GATA5	Gallus gallus GATA binding protein 5 (GATA5), mRNA. [Source:RefSeq mRNA;Acc:NM_205421]	17.7638	18.4502	9.75985	27.7875	26.0946	23.9525	15.3246	25.9449	down	1.69302	-0.759598	0.0476371	0.0502291	yes	GO:0006355(regulation of transcription, DNA-dependent),GO:0045893(positive regulation of transcription, DNA-dependent),GO:0045944(positive regulation of transcription from RNA polymerase II promoter),GO:0060575(intestinal epithelial cell differentiation),GO:0071773(cellular response to BMP stimulus),GO:0005634(nucleus),GO:0001158(enhancer sequence-specific DNA binding),GO:0003677(DNA binding),GO:…	NA
ENSGALT00000004522	chr7	2659245	2710824	-1	ENSGALG00000002866	KANSL1L	KAT8 regulatory NSL complex subunit 1-like [Source:HGNC Symbol;Acc:26310]	16.3853	17.0338	16.9565	28.8701	25.231	31.0767	16.7919	28.3926	down	1.69085	-0.757752	0.0196908	0.0528775	yes	GO:0000123(histone acetyltransferase complex)	NA
ENSGALT00000007303	chr21	5588806	5603988	-1	ENSGALG00000004590	CLCN6	chloride channel, voltage-sensitive 6 [Source:HGNC Symbol;Acc:2024]	4.88607	5.03989	5.46249	8.79061	8.67914	8.50115	5.12948	8.65697	down	1.68769	-0.755049	0.00042498	0.0507851	yes	GO:0006821(chloride transport),GO:0055085(transmembrane transport),GO:0016020(membrane),GO:0016021(integral to membrane),GO:0005765(lysosomal membrane),GO:0005216(ion channel activity),GO:0005247(voltage-gated chloride channel activity),GO:0030554(adenyl nucleotide binding)	NA
ENSGALT00000004175	chr21	3595756	3630094	1	ENSGALG00000002649	UBE4B	ubiquitination factor E4B [Source:HGNC Symbol;Acc:12500]	14.6153	10.5518	10.2227	22.4579	19.7227	17.3347	11.7966	19.8384	down	1.68171	-0.749926	0.0171656	0.0554404	yes	GO:0006511(ubiquitin-dependent protein catabolic process),GO:0016567(protein ubiquitination),GO:0008626(granzyme-mediated apoptotic signaling pathway),GO:0043161(proteasome-mediated ubiquitin-dependent protein catabolic process),GO:0009411(response to UV),GO:0000151(ubiquitin ligase complex),GO:0005737(cytoplasm),GO:0004842(ubiquitin-protein ligase activity),GO:0034450(ubiquitin-ubiquitin ligase …	04141(Protein processing in endoplasmic reticulum),04120(Ubiquitin mediated proteolysis)
ENSGALT00000009192	chr13	12566519	12588276	1	ENSGALG00000021313	PDGFRB	platelet-derived growth factor receptor, beta polypeptide [Source:HGNC Symbol;Acc:8804]	55.4492	54.5881	38.2938	72.0975	99.218	77.8155	49.4437	83.0437	down	1.67956	-0.748084	0.0341462	0.0507943	yes	GO:0006468(protein phosphorylation),GO:0007165(signal transduction),GO:0007169(transmembrane receptor protein tyrosine kinase signaling pathway),GO:0010863(positive regulation of phospholipase C activity),GO:0016310(phosphorylation),GO:0016477(cell migration),GO:0018108(peptidyl-tyrosine phosphorylation),GO:0030335(positive regulation of cell migration),GO:0032516(positive regulation of phosphopr…	04014(Ras signaling pathway),04010(MAPK signaling pathway),04020(Calcium signaling pathway),04151(PI3K-Akt signaling pathway),04060(Cytokine-cytokine receptor interaction),04810(Regulation of actin cytoskeleton),04510(Focal adhesion),04540(Gap junction),05200(Pathways in cancer),05206(MicroRNAs in cancer),05214(Glioma),05218(Melanoma),05215(Prostate cancer),05166(HTLV-I infection)
ENSGALT00000014182	chr7	13103070	13154191	-1	ENSGALG00000008714	ABI2	abl-interactor 2 [Source:HGNC Symbol;Acc:24011]	14.4605	8.38489	11.5914	20.1922	19.5165	18.1003	11.4789	19.2697	down	1.6787	-0.747347	0.0355413	0.0504616	yes	GO:0006928(cellular component movement),GO:0018108(peptidyl-tyrosine phosphorylation),GO:0043010(camera-type eye development),GO:0016358(dendrite development),GO:0007611(learning or memory),GO:0016477(cell migration),GO:0005737(cytoplasm),GO:0030175(filopodium),GO:0030027(lamellipodium),GO:0005829(cytosol),GO:0030425(dendrite),GO:0005913(cell-cell adherens junction),GO:0005515(protein binding),GO…	04810(Regulation of actin cytoskeleton)
ENSGALT00000044381	chr9	12410467	12423754	-1	ENSGALG00000028015	novel gene	Uncharacterized protein [Source:UniProtKB/TrEMBL;Acc:R4GJE0]	7.03921	8.43292	9.05921	3.99192	5.48703	5.1554	8.17711	4.87812	up	1.67628	0.745267	0.0136337	0.0534172	yes	GO:0006355(regulation of transcription, DNA-dependent),GO:0003677(DNA binding)	NA
ENSGALT00000023591	chr25	1386032	1419314	-1	ENSGALG00000014638	ASH1L	ash1 (absent, small, or homeotic)-like (Drosophila) [Source:HGNC Symbol;Acc:19088]	22.7886	14.2935	12.9495	32.1522	27.9839	23.7242	16.6772	27.9534	down	1.67615	-0.74515	0.0482488	0.0498479	yes	GO:0032259(methylation),GO:0034968(histone lysine methylation),GO:0005634(nucleus),GO:0005794(Golgi apparatus),GO:0005737(cytoplasm),GO:0003677(DNA binding),GO:0008168(methyltransferase activity),GO:0008270(zinc ion binding),GO:0016740(transferase activity),GO:0018024(histone-lysine N-methyltransferase activity),GO:0046872(metal ion binding),GO:0003682(chromatin binding),GO:0005515(protein bindin…	00310(Lysine degradation),04530(Tight junction)
ENSGALT00000015061	chr3	16502257	16508800	1	ENSGALG00000009253	SDE2	SDE2 telomere maintenance homolog (S. pombe) [Source:HGNC Symbol;Acc:26643]	16.0901	22.3514	23.8363	31.7864	41.5659	30.8126	20.7593	34.7217	down	1.67259	-0.742081	0.0342978	0.0505998	yes	()	NA
ENSGALT00000025759	chr2	126126452	126151324	1	ENSGALG00000015984	INTS8	Gallus gallus integrator complex subunit 8 (INTS8), mRNA. [Source:RefSeq mRNA;Acc:NM_001040228]	21.9199	12.3862	14.308	30.5388	25.3419	25.2002	16.2047	27.027	down	1.66785	-0.73799	0.0440381	0.0501196	yes	GO:0016180(snRNA processing),GO:0032039(integrator complex),GO:0005515(protein binding)	NA
ENSGALT00000006070	chr17	6092441	6131600	1	ENSGALG00000003830	NUP214	nucleoporin 214kDa [Source:HGNC Symbol;Acc:8064]	13.3796	18.9919	18.0659	30.7931	27.5361	25.7903	16.8125	28.0398	down	1.6678	-0.737947	0.00840074	0.0493715	yes	GO:0006611(protein export from nucleus),GO:0006606(protein import into nucleus),GO:0006406(mRNA export from nucleus),GO:0051726(regulation of cell cycle),GO:0005515(protein binding),GO:0005487(nucleocytoplasmic transporter activity)	03013(RNA transport),05169(Epstein-Barr virus infection)
ENSGALT00000019682	chr1	49977775	50105059	-1	ENSGALG00000012050	TNRC6B	trinucleotide repeat containing 6B [Source:HGNC Symbol;Acc:29190]	25.4672	22.1886	20.7895	38.694	43.3851	32.0607	22.8151	38.0466	down	1.66761	-0.73778	0.0292142	0.0514657	yes	GO:0031047(gene silencing by RNA),GO:1900153(positive regulation of nuclear-transcribed mRNA catabolic process, deadenylation-dependent decay),GO:0060213(positive regulation of nuclear-transcribed mRNA poly(A) tail shortening),GO:0000166(nucleotide binding),GO:0005515(protein binding)	NA
ENSGALT00000014525	chr8	17790799	17811115	1	ENSGALG00000008939	FUBP1	far upstream element-binding protein 1 [Source:RefSeq peptide;Acc:NP_001006535]	43.2806	33.9674	35.5688	72.099	55.3867	59.9869	37.6056	62.4909	down	1.66174	-0.732698	0.0199779	0.0524695	yes	GO:0010628(positive regulation of gene expression),GO:0005634(nucleus),GO:0003723(RNA binding),GO:0005515(protein binding)	NA
ENSGALT00000001481	chr23	2237791	2251391	-1	ENSGALG00000001003	SEPN1	Gallus gallus selenoprotein N, 1 (SEPN1), mRNA. [Source:RefSeq mRNA;Acc:NM_001114972]	15.5048	13.8502	11.2073	26.0513	18.4004	22.893	13.5208	22.4482	down	1.66028	-0.731426	0.0363763	0.0501573	yes	GO:0005515(protein binding)	NA
ENSGALT00000019920	chr5	56194399	56224761	1	ENSGALG00000012199	WDHD1	WD repeat and HMG-box DNA binding protein 1 [Source:HGNC Symbol;Acc:23170]	2.4178	3.70294	3.45045	5.29959	4.34419	6.23859	3.1904	5.29412	down	1.65939	-0.730657	0.040392	0.050367	yes	GO:0006396(RNA processing),GO:0033044(regulation of chromosome organization),GO:0070829(heterochromatin maintenance),GO:0005634(nucleus),GO:0000775(chromosome, centromeric region),GO:0005515(protein binding),GO:0003682(chromatin binding),GO:0003723(RNA binding),GO:0070063(RNA polymerase binding)	NA
ENSGALT00000014433	chr17	1365415	1417184	-1	ENSGALG00000008881	RGS3	Gallus gallus regulator of G-protein signaling 3 (RGS3), transcript variant 1, mRNA. [Source:RefSeq mRNA;Acc:NM_204459]	10.915	10.7953	9.80211	15.5943	19.8596	16.7776	10.5041	17.4105	down	1.65749	-0.729	0.0253574	0.0512148	yes	GO:0038032(termination of G-protein coupled receptor signaling pathway),GO:0005634(nucleus),GO:0005515(protein binding)	04360(Axon guidance)
ENSGALT00000039566	chr14	12495128	12563545	-1	ENSGALG00000007762	CREBBP	CREB binding protein [Source:HGNC Symbol;Acc:2348]	35.5558	23.9361	28.3617	49.7114	53.7811	41.8564	29.2845	48.4496	down	1.65445	-0.726347	0.0170565	0.0558426	yes	GO:0000122(negative regulation of transcription from RNA polymerase II promoter),GO:0006355(regulation of transcription, DNA-dependent),GO:0016573(histone acetylation),GO:0018076(N-terminal peptidyl-lysine acetylation),GO:0045944(positive regulation of transcription from RNA polymerase II promoter),GO:0045893(positive regulation of transcription, DNA-dependent),GO:0030718(germ-line stem cell main…	04310(Wnt signaling pathway),04330(Notch signaling pathway),04350(TGF-beta signaling pathway),04630(Jak-STAT signaling pathway),04066(HIF-1 signaling pathway),04110(Cell cycle),04520(Adherens junction),04916(Melanogenesis),04720(Long-term potentiation),05200(Pathways in cancer),05206(MicroRNAs in cancer),05203(Viral carcinogenesis),05211(Renal cell carcinoma),05215(Prostate cancer),05016(Huntingt…
ENSGALT00000020623	chr1	53339867	53411487	-1	ENSGALG00000012635	BTBD11	BTB (POZ) domain containing 11 [Source:HGNC Symbol;Acc:23844]	13.4675	13.8773	11.7042	8.72463	8.38943	6.54003	13.0163	7.8847	up	1.65083	0.723193	0.00572911	0.0466792	yes	GO:0005515(protein binding)	NA
ENSGALT00000013814	chr1	1361642	1822074	-1	ENSGALG00000008477	EXOC4	Gallus gallus exocyst complex component 4 (EXOC4), mRNA. [Source:RefSeq mRNA;Acc:NM_001199320]	8.63592	15.3831	14.5425	22.5312	21.8186	19.2746	12.8538	21.2082	down	1.64995	-0.72242	0.0413462	0.0505891	yes	GO:0006904(vesicle docking involved in exocytosis),GO:0015031(protein transport),GO:0000145(exocyst),GO:0005737(cytoplasm),GO:0032584(growth cone membrane),GO:0035748(myelin sheath abaxonal region),GO:0047485(protein N-terminus binding),GO:0005515(protein binding),GO:0030165(PDZ domain binding)	04530(Tight junction)
ENSGALT00000018011	chr2	33135117	33137007	-1	ENSGALG00000011059	HOXA6	Homeobox protein Hox-A6 [Source:UniProtKB/Swiss-Prot;Acc:Q5YLH5]	9.51688	6.75446	5.955	14.0244	11.3783	11.2251	7.40878	12.2093	down	1.64795	-0.720669	0.0284379	0.0512311	yes	GO:0006351(transcription, DNA-templated),GO:0006355(regulation of transcription, DNA-dependent),GO:0007275(multicellular organismal development),GO:0005634(nucleus),GO:0003677(DNA binding),GO:0003700(sequence-specific DNA binding transcription factor activity),GO:0043565(sequence-specific DNA binding)	NA
ENSGALT00000008561	chrZ	81065452	81098201	1	ENSGALG00000005337	SNX2	sorting nexin-2 [Source:RefSeq peptide;Acc:NP_001012625]	117.108	102.093	88.7267	69.4902	59.964	57.5789	102.643	62.3444	up	1.64638	0.7193	0.02454	0.0510006	yes	GO:0006886(intracellular protein transport),GO:0007154(cell communication),GO:0005737(cytoplasm),GO:0010008(endosome membrane),GO:0043231(intracellular membrane-bounded organelle),GO:0008565(protein transporter activity),GO:0035091(phosphatidylinositol binding),GO:0005515(protein binding)	NA
ENSGALT00000036426	chr1	181828577	181838749	-1	ENSGALG00000017186	ITA	Gallus gallus baculoviral IAP repeat containing 2 (BIRC2), mRNA. [Source:RefSeq mRNA;Acc:NM_001007822]	108.832	76.9711	87.4131	72.0332	42.8975	51.1919	91.0719	55.3742	up	1.64466	0.717793	0.0493738	0.0498606	yes	GO:0006915(apoptotic process),GO:0042981(regulation of apoptotic process),GO:0043066(negative regulation of apoptotic process),GO:0005622(intracellular),GO:0005634(nucleus),GO:0005737(cytoplasm),GO:0008270(zinc ion binding),GO:0046872(metal ion binding),GO:0005515(protein binding)	04120(Ubiquitin mediated proteolysis),04064(NF-kappa B signaling pathway),04668(TNF signaling pathway),04210(Apoptosis),04510(Focal adhesion),04621(NOD-like receptor signaling pathway),05200(Pathways in cancer),05222(Small cell lung cancer),05145(Toxoplasmosis)
ENSGALT00000005193	chr18	6582616	6594433	-1	ENSGALG00000003284	CRLF3	Gallus gallus cytokine receptor-like factor 3 (CRLF3), mRNA. [Source:RefSeq mRNA;Acc:NM_001079719]	20.6278	21.9759	26.774	45.5252	36.2474	32.042	23.1259	37.9382	down	1.64051	-0.714141	0.0472505	0.0499684	yes	GO:0071158(positive regulation of cell cycle arrest),GO:0046427(positive regulation of JAK-STAT cascade),GO:0000082(G1/S transition of mitotic cell cycle),GO:0030308(negative regulation of cell growth),GO:0045893(positive regulation of transcription, DNA-dependent),GO:0045944(positive regulation of transcription from RNA polymerase II promoter),GO:0005737(cytoplasm),GO:0005515(protein binding)	NA
ENSGALT00000002354	chr20	1104770	1132973	1	ENSGALG00000001550	RBM39	RNA binding motif protein 39 [Source:HGNC Symbol;Acc:HGNC:15923].	39.1397	42.195	39.7916	70.3739	63.6826	64.3686	40.3754	66.1417	down	1.63817	-0.712084	0.00234598	0.0391178	yes	GO:0006397(mRNA processing),GO:0005634(nucleus),GO:0000166(nucleotide binding),GO:0003676(nucleic acid binding),GO:0003723(RNA binding)	NA
ENSGALT00000023884	chr2	100479330	100487584	-1	ENSGALG00000014795	TGIF1	Gallus gallus TGFB-induced factor homeobox 1 (TGIF1), mRNA. [Source:RefSeq mRNA;Acc:NM_205379]	49.923	37.686	36.6434	19.5214	28.6639	27.6669	41.4175	25.2841	up	1.63809	0.712011	0.0418641	0.0505329	yes	GO:0006351(transcription, DNA-templated),GO:0006355(regulation of transcription, DNA-dependent),GO:0045892(negative regulation of transcription, DNA-dependent),GO:0000122(negative regulation of transcription from RNA polymerase II promoter),GO:0008285(negative regulation of cell proliferation),GO:0009953(dorsal/ventral pattern formation),GO:0010470(regulation of gastrulation),GO:0001843(neural tu…	NA
ENSGALT00000012072	chr4	11117719	11126899	1	ENSGALG00000007466	EDNRB2	Gallus gallus endothelin receptor B subtype 2 (EDNRB2), mRNA. [Source:RefSeq mRNA;Acc:NM_204120]	149.306	180.947	125.905	207.904	300.246	238.746	152.053	248.965	down	1.63736	-0.711373	0.049078	0.0496318	yes	GO:0007165(signal transduction),GO:0007186(G-protein coupled receptor signaling pathway),GO:0008217(regulation of blood pressure),GO:0042310(vasoconstriction),GO:0048484(enteric nervous system development),GO:0086100(endothelin receptor signaling pathway),GO:0016021(integral to membrane),GO:0004871(signal transducer activity),GO:0004930(G-protein coupled receptor activity),GO:0004962(endothelin r…	04020(Calcium signaling pathway),04080(Neuroactive ligand-receptor interaction),04916(Melanogenesis)
ENSGALT00000016524	chr3	29557966	29574363	1	ENSGALG00000010162	AARS2	Gallus gallus alanyl-tRNA synthetase 2, mitochondrial (putative) (AARS2), nuclear gene encoding mitochondrial protein, mRNA. [Source:RefSeq mRNA;Acc:NM_001031056]	5.3154	4.05996	5.76508	9.0444	9.02026	6.7167	5.04681	8.26046	down	1.63677	-0.710849	0.0320559	0.0502934	yes	GO:0006419(alanyl-tRNA aminoacylation),GO:0033108(mitochondrial respiratory chain complex assembly),GO:0043039(tRNA aminoacylation),GO:0070143(mitochondrial alanyl-tRNA aminoacylation),GO:0005737(cytoplasm),GO:0005739(mitochondrion),GO:0000166(nucleotide binding),GO:0003676(nucleic acid binding),GO:0004813(alanine-tRNA ligase activity),GO:0005524(ATP binding),GO:0016876(ligase activity, forming a…	00970(Aminoacyl-tRNA biosynthesis)
ENSGALT00000037871	chr1	50609571	50619165	1	ENSGALG00000023146	CBX7	chromobox homolog 7 [Source:HGNC Symbol;Acc:1557]	10.9082	16.3164	13.7246	26.671	20.8999	19.343	13.6497	22.3046	down	1.63407	-0.708472	0.0391373	0.0497544	yes	GO:0000122(negative regulation of transcription from RNA polymerase II promoter),GO:0031519(PcG protein complex),GO:0000790(nuclear chromatin),GO:0005634(nucleus),GO:0000792(heterochromatin),GO:0035102(PRC1 complex),GO:0005515(protein binding),GO:0003682(chromatin binding),GO:0035064(methylated histone residue binding),GO:0003727(single-stranded RNA binding)	NA
ENSGALT00000000128	chr1	192088910	192121226	1	ENSGALG00000000091	INTS4	integrator complex subunit 4 [Source:HGNC Symbol;Acc:25048]	12.0018	7.62668	14.0592	16.8548	18.9794	19.1861	11.2292	18.3401	down	1.63324	-0.707738	0.0495533	0.0498313	yes	GO:0016180(snRNA processing),GO:0032039(integrator complex),GO:0005515(protein binding),GO:0005488(binding)	NA
ENSGALT00000003452	chr15	1547558	1855522	-1	ENSGALG00000002205	FBRSL1	fibrosin-like 1 [Source:HGNC Symbol;Acc:29308]	22.1018	22.8673	25.0472	13.2545	16.6444	13.0333	23.3387	14.3107	up	1.63086	0.705629	0.00444179	0.0475338	yes	()	NA
ENSGALT00000038374	chr5	22949353	22992334	-1	ENSGALG00000008380	DGKZ	Gallus gallus diacylglycerol kinase, zeta (DGKZ), mRNA. [Source:RefSeq mRNA;Acc:NM_001031192]	13.1237	12.0415	17.1081	23.0808	27.2692	18.5915	14.0911	22.9805	down	1.63085	-0.705622	0.0496614	0.0497308	yes	GO:0007205(protein kinase C-activating G-protein coupled receptor signaling pathway),GO:0008152(metabolic process),GO:0035556(intracellular signal transduction),GO:0046834(lipid phosphorylation),GO:0031571(mitotic G1 DNA damage checkpoint),GO:0045930(negative regulation of mitotic cell cycle),GO:0046580(negative regulation of Ras protein signal transduction),GO:0043086(negative regulation of cata…	00561(Glycerolipid metabolism),00564(Glycerophospholipid metabolism),04070(Phosphatidylinositol signaling system)
ENSGALT00000039049	chr19	8721731	8728143	1	ENSGALG00000005530	VEZF1	Gallus gallus vascular endothelial zinc finger 1 (VEZF1), mRNA. [Source:RefSeq mRNA;Acc:NM_001037827]	19.5611	16.0869	15.5428	29.9996	29.9895	23.4484	17.0636	27.8125	down	1.62993	-0.704813	0.0207492	0.0523843	yes	GO:0001525(angiogenesis),GO:0001885(endothelial cell development),GO:0005634(nucleus),GO:0003676(nucleic acid binding),GO:0046872(metal ion binding)	NA
ENSGALT00000017291	chr8	23292172	23296086	1	ENSGALG00000010627	PRPF38A	Gallus gallus PRP38 pre-mRNA processing factor 38 (yeast) domain containing A (PRPF38A), mRNA. [Source:RefSeq mRNA;Acc:NM_001277667]	16.2786	18.6139	24.7859	36.1568	28.9157	32.0357	19.8928	32.3694	down	1.62719	-0.702384	0.0205362	0.0524002	yes	GO:0005515(protein binding)	03040(Spliceosome)
ENSGALT00000014765	chr3	11843164	11859876	-1	ENSGALG00000009073	PSEN2	Gallus gallus presenilin 2 (Alzheimer disease 4) (PSEN2), mRNA. [Source:RefSeq mRNA;Acc:NM_204302]	13.1734	14.7903	14.0643	24.5485	19.3347	24.3379	14.0093	22.7404	down	1.62323	-0.698867	0.0288958	0.051538	yes	GO:0035556(intracellular signal transduction),GO:0043085(positive regulation of catalytic activity),GO:0006509(membrane protein ectodomain proteolysis),GO:0030900(forebrain development),GO:0050852(T cell receptor signaling pathway),GO:0006816(calcium ion transport),GO:0048854(brain morphogenesis),GO:0043065(positive regulation of apoptotic process),GO:1902043(positive regulation of extrinsic apop…	04330(Notch signaling pathway),04722(Neurotrophin signaling pathway),05010(Alzheimer's disease)
ENSGALT00000009016	chr5	8219793	8238996	-1	ENSGALG00000005618	CTR9	CTR9, Paf1/RNA polymerase II complex component [Source:HGNC Symbol;Acc:16850]	13.4054	10.0249	9.24121	21.4798	15.8915	15.6302	10.8905	17.6672	down	1.62225	-0.697999	0.0496054	0.0498138	yes	GO:0000122(negative regulation of transcription from RNA polymerase II promoter),GO:0001711(endodermal cell fate commitment),GO:0007259(JAK-STAT cascade),GO:0010390(histone monoubiquitination),GO:0019827(stem cell maintenance),GO:0032968(positive regulation of transcription elongation from RNA polymerase II promoter),GO:0033523(histone H2B ubiquitination),GO:0045638(negative regulation of myeloid…	NA
ENSGALT00000010428	chr4	4390057	4400409	-1	ENSGALG00000006457	RBMX	Gallus gallus RNA binding motif protein, X-linked (RBMX), mRNA. [Source:RefSeq mRNA;Acc:NM_001079728]	65.5817	55.5365	60.6778	103.367	99.6911	90.8945	60.5987	97.9841	down	1.61693	-0.693261	0.00170242	0.0393754	yes	GO:0000166(nucleotide binding),GO:0003676(nucleic acid binding)	03040(Spliceosome)
ENSGALT00000045187	chr20	5280566	5284670	-1	ENSGALG00000027603	ZHX3	zinc fingers and homeoboxes 3 [Source:HGNC Symbol;Acc:15935]	16.1528	19.9974	15.1119	11.0376	10.8815	9.79851	17.0874	10.5725	up	1.61621	0.692612	0.0407975	0.0503473	yes	GO:0006355(regulation of transcription, DNA-dependent),GO:0045669(positive regulation of osteoblast differentiation),GO:0045892(negative regulation of transcription, DNA-dependent),GO:0005634(nucleus),GO:0005730(nucleolus),GO:0005737(cytoplasm),GO:0003677(DNA binding),GO:0003700(sequence-specific DNA binding transcription factor activity),GO:0043565(sequence-specific DNA binding),GO:0046872(metal…	NA
ENSGALT00000039070	chr19	8630999	8638175	-1	ENSGALG00000005489	DDX52	Gallus gallus DEAD (Asp-Glu-Ala-Asp) box polypeptide 52 (DDX52), mRNA. [Source:RefSeq mRNA;Acc:NM_001030725]	4.27091	5.45618	4.7213	8.89336	6.34178	8.108	4.81613	7.78105	down	1.61562	-0.69209	0.0417868	0.0505247	yes	GO:0003676(nucleic acid binding),GO:0004386(helicase activity),GO:0005524(ATP binding),GO:0008026(ATP-dependent helicase activity),GO:0016787(hydrolase activity),GO:0003677(DNA binding)	NA
ENSGALT00000015941	chr4	28804667	28817428	-1	ENSGALG00000009800	SETD7	SET domain containing (lysine methyltransferase) 7 [Source:HGNC Symbol;Acc:30412]	14.0368	11.0406	18.4031	21.8649	25.6016	22.7802	14.4935	23.4156	down	1.61559	-0.69206	0.0338828	0.0507181	yes	GO:0006355(regulation of transcription, DNA-dependent),GO:0034968(histone lysine methylation),GO:0018026(peptidyl-lysine monomethylation),GO:0018027(peptidyl-lysine dimethylation),GO:0005694(chromosome),GO:0018024(histone-lysine N-methyltransferase activity),GO:0005515(protein binding),GO:0016279(protein-lysine N-methyltransferase activity),GO:0002039(p53 binding)	00310(Lysine degradation)
ENSGALT00000007669	chr20	7046100	7055150	1	ENSGALG00000021230	EPB42	erythrocyte membrane protein band 4.2 [Source:HGNC Symbol;Acc:3381]	5.61252	6.46581	4.47898	9.95937	9.54963	7.22888	5.5191	8.91262	down	1.61487	-0.691417	0.0360869	0.050734	yes	GO:0000902(cell morphogenesis),GO:0018149(peptide cross-linking),GO:0020027(hemoglobin metabolic process),GO:0048536(spleen development),GO:0050801(ion homeostasis),GO:0055072(iron ion homeostasis),GO:0016020(membrane),GO:0030863(cortical cytoskeleton),GO:0003810(protein-glutamine gamma-glutamyltransferase activity),GO:0005515(protein binding)	NA
ENSGALT00000040353	chr17	1438484	1442702	1	ENSGALG00000008873	POLE3	Gallus gallus polymerase (DNA directed), epsilon 3, accessory subunit (POLE3), mRNA. [Source:RefSeq mRNA;Acc:NM_001025354]	18.2564	10.7696	13.649	24.1917	24.0848	20.6011	14.225	22.9592	down	1.61401	-0.690645	0.0372673	0.0499451	yes	GO:0043966(histone H3 acetylation),GO:0005622(intracellular),GO:0005671(Ada2/Gcn5/Ada3 transcription activator complex),GO:0008622(epsilon DNA polymerase complex),GO:0043565(sequence-specific DNA binding),GO:0046982(protein heterodimerization activity),GO:0005515(protein binding)	00230(Purine metabolism),00240(Pyrimidine metabolism),03030(DNA replication),03410(Base excision repair),03420(Nucleotide excision repair),05166(HTLV-I infection)
ENSGALT00000040656	chr14	5087251	5092248	1	ENSGALG00000024082	SMCR8	Smith-Magenis syndrome chromosome region, candidate 8 [Source:HGNC Symbol;Acc:17921]	41.9156	48.6372	37.4305	22.8216	31.2747	25.2488	42.6611	26.4484	up	1.613	0.689742	0.0190917	0.0534717	yes	GO:0005634(nucleus)	NA
ENSGALT00000023641	chrZ	57249953	57293849	1	ENSGALG00000014670	TTC37	tetratricopeptide repeat domain 37 [Source:HGNC Symbol;Acc:23639]	9.16471	5.68953	8.89344	13.2368	13.1512	11.8512	7.9159	12.7464	down	1.61023	-0.687268	0.0353127	0.0507399	yes	GO:0055087(Ski complex),GO:0035327(transcriptionally active chromatin),GO:0005737(cytoplasm),GO:0005634(nucleus),GO:0005515(protein binding)	03018(RNA degradation)
ENSGALT00000018398	chr8	27684061	27694395	-1	ENSGALG00000011275	DEPDC1	Gallus gallus DEP domain containing 1 (DEPDC1), mRNA. [Source:RefSeq mRNA;Acc:NM_001012928]	3.08022	2.55049	3.85477	5.77257	4.27453	5.19426	3.16183	5.08046	down	1.60681	-0.6842	0.0302099	0.0510862	yes	GO:0007165(signal transduction),GO:0035556(intracellular signal transduction),GO:0045892(negative regulation of transcription, DNA-dependent),GO:0005622(intracellular),GO:0005634(nucleus),GO:0017053(transcriptional repressor complex),GO:0005515(protein binding)	NA
ENSGALT00000008452	chr11	10927995	10964663	-1	ENSGALG00000005266	BEAN1	Gallus gallus brain expressed, associated with NEDD4, 1 (BEAN1), mRNA. [Source:RefSeq mRNA;Acc:NM_001141926]	21.822	26.6535	22.0169	13.3151	14.7895	15.7749	23.4975	14.6265	up	1.6065	0.683925	0.0172493	0.0547245	yes	GO:0005515(protein binding)	NA
ENSGALT00000009626	chr5	9634001	9761468	-1	ENSGALG00000005986	TUB	tubby bipartite transcription factor [Source:HGNC Symbol;Acc:12406]	6.1001	8.20318	6.83046	10.563	12.3861	10.9845	7.04458	11.3112	down	1.60566	-0.683166	0.00692701	0.0464175	yes	GO:0050766(positive regulation of phagocytosis),GO:0007605(sensory perception of sound),GO:0007602(phototransduction),GO:0060041(retina development in camera-type eye),GO:0009584(detection of visible light),GO:0044259(multicellular organismal macromolecule metabolic process),GO:0043231(intracellular membrane-bounded organelle),GO:0005829(cytosol),GO:0005515(protein binding),GO:0008020(G-protein c…	NA
ENSGALT00000039650	chr21	4764694	4774114	1	ENSGALG00000004043	NBL1	Gallus gallus neuroblastoma, suppression of tumorigenicity 1 (NBL1), mRNA. [Source:RefSeq mRNA;Acc:NM_204149]	47.3715	55.2535	55.3773	25.6929	37.4561	35.5083	52.6674	32.8857	up	1.60153	0.679449	0.0143417	0.0535574	yes	GO:0007399(nervous system development),GO:0035582(sequestering of BMP in extracellular matrix),GO:0045666(positive regulation of neuron differentiation),GO:0048263(determination of dorsal identity),GO:0048812(neuron projection morphogenesis),GO:0090027(negative regulation of monocyte chemotaxis),GO:0005576(extracellular region),GO:0016015(morphogen activity),GO:0036122(BMP binding),GO:0005515(pro…	NA
ENSGALT00000010204	chrLGE22C19W28_E50C23	378597	397098	1	ENSGALG00000006311	HDAC7	Gallus gallus histone deacetylase 7 (HDAC7), mRNA. [Source:RefSeq mRNA;Acc:NM_001031402]	14.2625	11.8785	10.6244	18.5467	22.4989	17.8221	12.2551	19.6225	down	1.60117	-0.679129	0.0178545	0.0535636	yes	GO:0016568(chromatin modification),GO:0016575(histone deacetylation),GO:0090050(positive regulation of cell migration involved in sprouting angiogenesis),GO:0045668(negative regulation of osteoblast differentiation),GO:0032703(negative regulation of interleukin-2 production),GO:0000122(negative regulation of transcription from RNA polymerase II promoter),GO:0001570(vasculogenesis),GO:0007043(cell…	05203(Viral carcinogenesis),05034(Alcoholism)
ENSGALT00000027961	chr1	195193901	195237670	-1	ENSGALG00000017302	SLCO2B1	solute carrier organic anion transporter family, member 2B1 [Source:HGNC Symbol;Acc:10962]	12.1141	10.5466	10.1322	18.7676	18.3578	15.3782	10.931	17.5012	down	1.60107	-0.679034	0.0111461	0.0493319	yes	GO:0006810(transport),GO:0055085(transmembrane transport),GO:0016020(membrane),GO:0016021(integral to membrane),GO:0005215(transporter activity),GO:0005515(protein binding),GO:0015347(sodium-independent organic anion transmembrane transporter activity),GO:0008514(organic anion transmembrane transporter activity)	NA
ENSGALT00000040497	chr6	13474304	13762719	-1	ENSGALG00000004990	C10orf11	chromosome 10 open reading frame 11 [Source:HGNC Symbol;Acc:23405]	10.1259	10.4897	6.17611	14.6959	12.3063	15.8114	8.9306	14.2712	down	1.59801	-0.676277	0.0403172	0.0503614	yes	GO:0030318(melanocyte differentiation)	NA
ENSGALT00000023070	chr1	75640948	75660086	1	ENSGALG00000014263	PHC1	Gallus gallus polyhomeotic homolog 1 (Drosophila) (PHC1), mRNA. [Source:RefSeq mRNA;Acc:NM_001006249]	5.13149	6.06999	5.97807	9.74713	8.6496	8.94278	5.72652	9.11317	down	1.5914	-0.670295	0.00163858	0.0451869	yes	GO:0071300(cellular response to retinoic acid),GO:0005634(nucleus),GO:0031519(PcG protein complex),GO:0035102(PRC1 complex),GO:0016604(nuclear body),GO:0001739(sex chromatin),GO:0008270(zinc ion binding),GO:0005515(protein binding),GO:0003682(chromatin binding)	NA
ENSGALT00000016531	chrZ	26415507	26430542	1	ENSGALG00000010166	VLDL	Uncharacterized protein [Source:UniProtKB/TrEMBL;Acc:F1NC45]	44.3486	49.4477	36.0666	77.5487	67.2521	61.5676	43.2876	68.7895	down	1.58913	-0.668233	0.0147788	0.0540634	yes	GO:0034436(glycoprotein transport),GO:0034447(very-low-density lipoprotein particle clearance),GO:0006898(receptor-mediated endocytosis),GO:0000122(negative regulation of transcription from RNA polymerase II promoter),GO:0021517(ventral spinal cord development),GO:0045860(positive regulation of protein kinase activity),GO:1900006(positive regulation of dendrite development),GO:0038026(reelin-medi…	NA
ENSGALT00000020118	chr2	50456464	50464743	1	ENSGALG00000012310	RALA	v-ral simian leukemia viral oncogene homolog A (ras related) [Source:HGNC Symbol;Acc:9839]	7.71999	5.66178	7.56799	10.9313	9.21345	13.1258	6.98325	11.0902	down	1.58811	-0.667313	0.0471622	0.0499487	yes	GO:0000910(cytokinesis),GO:0006184(GTP catabolic process),GO:0007165(signal transduction),GO:0007264(small GTPase mediated signal transduction),GO:0017157(regulation of exocytosis),GO:0031532(actin cytoskeleton reorganization),GO:0051491(positive regulation of filopodium assembly),GO:0051665(membrane raft localization),GO:0006886(intracellular protein transport),GO:0006913(nucleocytoplasmic trans…	NA
ENSGALT00000014169	chr3	14767125	14785636	-1	ENSGALG00000008707	CSRP2BP	Gallus gallus CSRP2 binding protein (CSRP2BP), mRNA. [Source:RefSeq mRNA;Acc:NM_001199441]	5.55238	5.58967	5.618	8.70823	9.27908	8.6012	5.58668	8.86284	down	1.58642	-0.665777	0.0038601	0.048556	yes	GO:0043966(histone H3 acetylation),GO:0009790(embryo development),GO:0016573(histone acetylation),GO:0000086(G2/M transition of mitotic cell cycle),GO:0005634(nucleus),GO:0005671(Ada2/Gcn5/Ada3 transcription activator complex),GO:0004402(histone acetyltransferase activity),GO:0008080(N-acetyltransferase activity),GO:0005515(protein binding)	NA
ENSGALT00000044199	chr11	7596758	7603866	-1	ENSGALG00000025819	UQCRFS1	Gallus gallus ubiquinol-cytochrome c reductase, Rieske iron-sulfur polypeptide 1 (UQCRFS1), nuclear gene encoding mitochondrial protein, mRNA. [Source:RefSeq mRNA;Acc:NM_001005843]	31.2686	27.4333	22.484	15.2735	15.1212	20.8411	27.062	17.0786	up	1.58456	0.664078	0.0384402	0.0498401	yes	GO:0055114(oxidation-reduction process),GO:0005739(mitochondrion),GO:0005743(mitochondrial inner membrane),GO:0016020(membrane),GO:0016021(integral to membrane),GO:0070469(respiratory chain),GO:0008121(ubiquinol-cytochrome-c reductase activity),GO:0016491(oxidoreductase activity),GO:0016679(oxidoreductase activity, acting on diphenols and related substances as donors),GO:0046872(metal ion binding…	00190(Oxidative phosphorylation),02020(Two-component system),04260(Cardiac muscle contraction),05010(Alzheimer's disease),05012(Parkinson's disease),05016(Huntington's disease),04932(Non-alcoholic fatty liver disease (NAFLD))
ENSGALT00000014022	chr7	12107101	12129187	1	ENSGALG00000008610	INO80D	INO80 complex subunit D [Source:HGNC Symbol;Acc:25997]	11.389	8.74575	10.4366	16.4842	15.7532	16.1448	10.1905	16.1274	down	1.5826	-0.662297	0.0119255	0.0502975	yes	()	NA
ENSGALT00000044485	chr20	731978	793905	-1	ENSGALG00000001420	RALGAPB	Gallus gallus Ral GTPase activating protein, beta subunit (non-catalytic) (RALGAPB), mRNA. [Source:RefSeq mRNA;Acc:NM_001030846]	12.2614	9.3104	11.4583	20.6933	16.5253	15.035	11.01	17.4179	down	1.582	-0.661747	0.0436386	0.0504659	yes	GO:0043547(positive regulation of GTPase activity),GO:0051056(regulation of small GTPase mediated signal transduction),GO:0032484(Ral protein signal transduction),GO:0032859(activation of Ral GTPase activity),GO:0032880(regulation of protein localization),GO:0060178(regulation of exocyst localization),GO:0005096(GTPase activator activity),GO:0017123(Ral GTPase activator activity)	NA
ENSGALT00000002165	chr20	735965	793938	-1	ENSGALG00000001420	RALGAPB	Gallus gallus Ral GTPase activating protein, beta subunit (non-catalytic) (RALGAPB), mRNA. [Source:RefSeq mRNA;Acc:NM_001030846]	15.986	12.898	16.6137	28.0926	22.4921	21.3882	15.1659	23.991	down	1.5819	-0.661661	0.0316098	0.0513929	yes	GO:0043547(positive regulation of GTPase activity),GO:0051056(regulation of small GTPase mediated signal transduction),GO:0032484(Ral protein signal transduction),GO:0032859(activation of Ral GTPase activity),GO:0032880(regulation of protein localization),GO:0060178(regulation of exocyst localization),GO:0005096(GTPase activator activity),GO:0017123(Ral GTPase activator activity)	NA
ENSGALT00000008918	chr14	6136627	6146861	1	ENSGALG00000005558	TBL3	Gallus gallus transducin (beta)-like 3 (TBL3), mRNA. [Source:RefSeq mRNA;Acc:NM_001006166]	8.29565	13.738	13.3578	21.4199	17.2222	17.3236	11.7971	18.6552	down	1.58134	-0.661144	0.0399985	0.0502258	yes	GO:0006364(rRNA processing),GO:0005634(nucleus),GO:0005730(nucleolus),GO:0032040(small-subunit processome),GO:0005515(protein binding)	03008(Ribosome biogenesis in eukaryotes)
ENSGALT00000040547	chr4	1627388	1647378	-1	ENSGALG00000003920	OCRL	oculocerebrorenal syndrome of Lowe [Source:HGNC Symbol;Acc:8108]	9.66952	6.9543	9.22367	13.1548	15.2795	12.4127	8.61583	13.6157	down	1.58031	-0.660208	0.0141614	0.0537233	yes	GO:0007165(signal transduction),GO:0046856(phosphatidylinositol dephosphorylation),GO:0032855(positive regulation of Rac GTPase activity),GO:0032314(regulation of Rac GTPase activity),GO:0042384(cilium assembly),GO:0001701(in utero embryonic development),GO:0005622(intracellular),GO:0030136(clathrin-coated vesicle),GO:0005769(early endosome),GO:0005802(trans-Golgi network),GO:0001750(photorecepto…	00562(Inositol phosphate metabolism),04070(Phosphatidylinositol signaling system)
ENSGALT00000043783	chr2	69250190	69321768	1	ENSGALG00000012916	DROSHA	Gallus gallus drosha, ribonuclease type III (DROSHA), mRNA. [Source:RefSeq mRNA;Acc:NM_001006379]	4.86356	3.42308	3.34761	6.88667	5.12951	6.36679	3.87808	6.12766	down	1.58007	-0.659992	0.0351576	0.0508225	yes	GO:0006396(RNA processing),GO:0010468(regulation of gene expression),GO:0010586(miRNA metabolic process),GO:0016075(rRNA catabolic process),GO:0031054(pre-miRNA processing),GO:0003723(RNA binding),GO:0004521(endoribonuclease activity),GO:0004525(ribonuclease III activity),GO:0005515(protein binding)	03008(Ribosome biogenesis in eukaryotes),05205(Proteoglycans in cancer)
ENSGALT00000044326	chr12	4487788	4565885	-1	ENSGALG00000004937	VGLL4	Gallus gallus vestigial like 4 (Drosophila) (VGLL4), mRNA. [Source:RefSeq mRNA;Acc:NM_001030593]	32.5742	38.3017	38.433	55.0736	66.12	51.474	36.4363	57.5559	down	1.57963	-0.659586	0.0263384	0.0511778	yes	GO:0006355(regulation of transcription, DNA-dependent)	NA
ENSGALT00000020617	chr1	53306966	53321328	-1	ENSGALG00000012631	PWP1	Gallus gallus PWP1 homolog (S. cerevisiae) (PWP1), mRNA. [Source:RefSeq mRNA;Acc:NM_001030761]	8.74788	10.39	13.8149	19.4798	17.4912	15.0467	10.9843	17.3392	down	1.57855	-0.6586	0.0330321	0.0509334	yes	GO:0005515(protein binding)	NA
ENSGALT00000012073	chr4	11117414	11126293	1	ENSGALG00000007466	EDNRB2	Gallus gallus endothelin receptor B subtype 2 (EDNRB2), mRNA. [Source:RefSeq mRNA;Acc:NM_204120]	172.873	186.487	128.932	218.052	303.723	248.884	162.764	256.886	down	1.57828	-0.658351	0.0428178	0.0507443	yes	GO:0007165(signal transduction),GO:0007186(G-protein coupled receptor signaling pathway),GO:0008217(regulation of blood pressure),GO:0042310(vasoconstriction),GO:0048484(enteric nervous system development),GO:0086100(endothelin receptor signaling pathway),GO:0016021(integral to membrane),GO:0004871(signal transducer activity),GO:0004930(G-protein coupled receptor activity),GO:0004962(endothelin r…	04020(Calcium signaling pathway),04080(Neuroactive ligand-receptor interaction),04916(Melanogenesis)
ENSGALT00000001298	chr13	496480	503150	1	ENSGALG00000000884	CXXC5	CXXC finger protein 5 [Source:HGNC Symbol;Acc:26943]	5.15824	4.15815	5.29975	2.78472	2.65122	3.84607	4.87205	3.094	up	1.57467	0.655054	0.0271501	0.0508266	yes	GO:0007165(signal transduction),GO:0043123(positive regulation of I-kappaB kinase/NF-kappaB signaling),GO:0003677(DNA binding),GO:0004871(signal transducer activity),GO:0008270(zinc ion binding)	NA
ENSGALT00000037168	chr2	68405652	68508208	1	ENSGALG00000012903	PIGN	phosphatidylinositol glycan anchor biosynthesis, class N [Source:HGNC Symbol;Acc:8967]	2.73445	3.16268	3.35869	4.80825	4.38499	5.3718	3.08527	4.85501	down	1.57361	-0.654077	0.00989478	0.048928	yes	GO:0006506(GPI anchor biosynthetic process),GO:0008152(metabolic process),GO:0005789(endoplasmic reticulum membrane),GO:0003824(catalytic activity),GO:0016740(transferase activity)	00563(Glycosylphosphatidylinositol(GPI)-anchor biosynthesis)
ENSGALT00000012914	chr4	12913182	12975486	1	ENSGALG00000007952	AMOT	angiomotin [Source:HGNC Symbol;Acc:17810]	16.2385	12.0811	10.6512	20.0212	21.843	19.4493	12.9903	20.4378	down	1.57332	-0.653812	0.0319969	0.0504215	yes	GO:0016525(negative regulation of angiogenesis),GO:0030334(regulation of cell migration),GO:0035329(hippo signaling),GO:0043116(negative regulation of vascular permeability),GO:0043536(positive regulation of blood vessel endothelial cell migration),GO:0001570(vasculogenesis),GO:0001701(in utero embryonic development),GO:0006935(chemotaxis),GO:0034613(cellular protein localization),GO:0030036(acti…	04390(Hippo signaling pathway)
ENSGALT00000023447	chr15	6301498	6347392	-1	ENSGALG00000014531	HECTD4	HECT domain containing E3 ubiquitin protein ligase 4 [Source:HGNC Symbol;Acc:26611]	17.5477	13.0057	13.5263	27.4313	20.7283	21.1909	14.6932	23.1168	down	1.5733	-0.653793	0.0385466	0.0497981	yes	GO:0016567(protein ubiquitination),GO:0004842(ubiquitin-protein ligase activity),GO:0016874(ligase activity)	NA
ENSGALT00000039991	chr14	8067317	8147095	1	ENSGALG00000006757	XYLT1	xylosyltransferase I [Source:HGNC Symbol;Acc:15516]	24.1048	22.0669	16.2489	28.4431	35.9236	33.798	20.8069	32.7215	down	1.57263	-0.653182	0.021353	0.0524318	yes	GO:0006024(glycosaminoglycan biosynthetic process),GO:0034605(cellular response to heat),GO:0016020(membrane),GO:0008375(acetylglucosaminyltransferase activity),GO:0030158(protein xylosyltransferase activity)	00532(Glycosaminoglycan biosynthesis - chondroitin sulfate / dermatan sulfate),00534(Glycosaminoglycan biosynthesis - heparan sulfate / heparin)
ENSGALT00000008724	chrZ	81490914	81526558	-1	ENSGALG00000005433	novel gene	Uncharacterized protein [Source:UniProtKB/TrEMBL;Acc:E1C6F7]	4.61335	6.79105	7.37716	11.7412	8.96297	8.82227	6.26052	9.84215	down	1.5721	-0.65269	0.0485223	0.0499146	yes	GO:0003676(nucleic acid binding),GO:0008270(zinc ion binding)	03018(RNA degradation)
ENSGALT00000001018	chr26	2226495	2244464	-1	ENSGALG00000000721	SLC41A1	solute carrier family 41 (magnesium transporter), member 1 [Source:HGNC Symbol;Acc:19429]	14.2409	17.6941	18.162	8.87355	12.7024	10.2961	16.699	10.624	up	1.57182	0.652433	0.0222488	0.0517934	yes	GO:0006812(cation transport),GO:0008324(cation transmembrane transporter activity)	NA
ENSGALT00000016799	chr5	37468792	37483006	-1	ENSGALG00000010318	TMED10	Gallus gallus transmembrane emp24-like trafficking protein 10 (yeast) (TMED10), mRNA. [Source:RefSeq mRNA;Acc:NM_001006482]	176.665	223.902	207.433	145.661	115.776	125.468	202.667	128.968	up	1.57145	0.652092	0.0157937	0.0549713	yes	GO:0006810(transport),GO:0006886(intracellular protein transport),GO:0007030(Golgi organization),GO:0034205(beta-amyloid formation),GO:0035964(COPI-coated vesicle budding),GO:0045055(regulated secretory pathway),GO:0048199(vesicle targeting, to, from or within Golgi),GO:0005783(endoplasmic reticulum),GO:0005793(endoplasmic reticulum-Golgi intermediate compartment),GO:0005794(Golgi apparatus),GO:0…	NA
ENSGALT00000000184	chr22	291968	308523	-1	ENSGALG00000000132	ARHGAP25	Gallus gallus Rho GTPase activating protein 25 (ARHGAP25), mRNA. [Source:RefSeq mRNA;Acc:NM_001030883]	12.6947	13.3442	17.0905	24.5719	24.1031	19.0651	14.3764	22.58	down	1.57063	-0.651341	0.0236145	0.0509988	yes	GO:0007165(signal transduction),GO:0043547(positive regulation of GTPase activity),GO:0005622(intracellular),GO:0005096(GTPase activator activity),GO:0005543(phospholipid binding)	NA
ENSGALT00000003255	chrZ	70563534	70595518	-1	ENSGALG00000002087	NCBP1	Gallus gallus nuclear cap binding protein subunit 1, 80kDa (NCBP1), mRNA. [Source:RefSeq mRNA;Acc:NM_001031440]	17.0008	13.8834	13.5797	25.9082	21.3557	22.4885	14.8213	23.2508	down	1.56874	-0.649609	0.0096423	0.0483464	yes	GO:0000184(nuclear-transcribed mRNA catabolic process, nonsense-mediated decay),GO:0006370(7-methylguanosine mRNA capping),GO:0006379(mRNA cleavage),GO:0006397(mRNA processing),GO:0006406(mRNA export from nucleus),GO:0006417(regulation of translation),GO:0006446(regulation of translational initiation),GO:0006810(transport),GO:0008380(RNA splicing),GO:0016070(RNA metabolic process),GO:0031047(gene…	03040(Spliceosome),03013(RNA transport),03015(mRNA surveillance pathway)
ENSGALT00000044388	chr3	105319047	105329333	1	ENSGALG00000026301	novel gene	Gallus gallus serine/threonine kinase 35-like (LOC426385), mRNA. [Source:RefSeq mRNA;Acc:NM_001031378]	2.64241	2.24314	1.78312	3.23666	4.05524	3.16161	2.22289	3.48451	down	1.56756	-0.648517	0.0299855	0.0514345	yes	GO:0006468(protein phosphorylation),GO:0000166(nucleotide binding),GO:0004672(protein kinase activity),GO:0004674(protein serine/threonine kinase activity),GO:0005524(ATP binding),GO:0016772(transferase activity, transferring phosphorus-containing groups),GO:0004713(protein tyrosine kinase activity)	NA
ENSGALT00000010107	chr6	18276677	18322841	-1	ENSGALG00000006254	ERCC6	excision repair cross-complementing rodent repair deficiency, complementation group 6 [Source:HGNC Symbol;Acc:3438]	4.83159	4.30324	3.15665	7.42729	5.4823	6.30714	4.09716	6.40558	down	1.56342	-0.644705	0.0378043	0.0500104	yes	GO:0006284(base-excision repair),GO:0006979(response to oxidative stress),GO:0009411(response to UV),GO:0032784(regulation of DNA-dependent transcription, elongation),GO:0032786(positive regulation of DNA-dependent transcription, elongation),GO:0006281(DNA repair),GO:0035264(multicellular organism growth),GO:0006290(pyrimidine dimer repair),GO:0008630(intrinsic apoptotic signaling pathway in resp…	03420(Nucleotide excision repair)
ENSGALT00000015428	chr2	22843081	22962940	-1	ENSGALG00000009476	CDK6	Gallus gallus cyclin-dependent kinase 6 (CDK6), mRNA. [Source:RefSeq mRNA;Acc:NM_001007892]	27.0081	31.4562	25.7831	44.3426	37.9127	49.4093	28.0825	43.8882	down	1.56283	-0.644163	0.0243173	0.0511304	yes	GO:0001954(positive regulation of cell-matrix adhesion),GO:0002244(hematopoietic progenitor cell differentiation),GO:0003323(type B pancreatic cell development),GO:0006468(protein phosphorylation),GO:0007219(Notch signaling pathway),GO:0009615(response to virus),GO:0010468(regulation of gene expression),GO:0010628(positive regulation of gene expression),GO:0016310(phosphorylation),GO:0030097(hemo…	04151(PI3K-Akt signaling pathway),04110(Cell cycle),04115(p53 signaling pathway),05200(Pathways in cancer),05206(MicroRNAs in cancer),05203(Viral carcinogenesis),05212(Pancreatic cancer),05214(Glioma),05220(Chronic myeloid leukemia),05218(Melanoma),05222(Small cell lung cancer),05223(Non-small cell lung cancer),05162(Measles),05161(Hepatitis B)
ENSGALT00000000994	chr26	2138284	2146798	-1	ENSGALG00000000701	ELK4	ELK4, ETS-domain protein (SRF accessory protein 1) [Source:HGNC Symbol;Acc:3326]	16.9656	13.972	12.4139	22.1896	24.9947	20.5569	14.4505	22.5804	down	1.5626	-0.643949	0.0120044	0.0503342	yes	GO:0000122(negative regulation of transcription from RNA polymerase II promoter),GO:0006355(regulation of transcription, DNA-dependent),GO:0070932(histone H3 deacetylation),GO:0005634(nucleus),GO:0005737(cytoplasm),GO:0003677(DNA binding),GO:0003682(chromatin binding),GO:0003700(sequence-specific DNA binding transcription factor activity),GO:0043565(sequence-specific DNA binding),GO:0005515(prote…	04010(MAPK signaling pathway),05202(Transcriptional misregulation in cancers),05166(HTLV-I infection)
ENSGALT00000028004	chr1	194317765	194448987	-1	ENSGALG00000017329	FCHSD2	FCH and double SH3 domains 2 [Source:HGNC Symbol;Acc:29114]	9.24247	9.83082	11.8288	16.1048	16.6227	15.5486	10.3007	16.092	down	1.56223	-0.643605	0.00966904	0.0481437	yes	GO:0005515(protein binding)	NA
ENSGALT00000002396	chr18	3381144	3397970	-1	ENSGALG00000001577	FOXK2	forkhead box K2 [Source:HGNC Symbol;Acc:6036]	9.49018	6.15064	8.51655	14.9789	11.4655	11.2551	8.05246	12.5665	down	1.56058	-0.642082	0.0466564	0.0499293	yes	GO:0006351(transcription, DNA-templated),GO:0006355(regulation of transcription, DNA-dependent),GO:0007389(pattern specification process),GO:0009790(embryo development),GO:0009888(tissue development),GO:0005634(nucleus),GO:0043231(intracellular membrane-bounded organelle),GO:0000287(magnesium ion binding),GO:0003677(DNA binding),GO:0003700(sequence-specific DNA binding transcription factor activi…	NA
ENSGALT00000018451	chr1	44935663	45003163	1	ENSGALG00000011309	PLXNC1	plexin C1 [Source:HGNC Symbol;Acc:9106]	59.0075	54.4629	51.9233	98.0325	72.6762	86.9574	55.1312	85.8887	down	1.5579	-0.639599	0.0438176	0.0501072	yes	GO:0007165(signal transduction),GO:0007275(multicellular organismal development),GO:0005622(intracellular),GO:0016020(membrane),GO:0016021(integral to membrane),GO:0004872(receptor activity),GO:0005515(protein binding)	04360(Axon guidance)
ENSGALT00000026100	chr1	108960140	108987823	1	ENSGALG00000016191	PKNOX1	PBX/knotted 1 homeobox 1 [Source:HGNC Symbol;Acc:9022]	6.97197	4.99283	5.65956	9.96628	7.74021	9.74895	5.87479	9.15182	down	1.55781	-0.639522	0.0247711	0.0510369	yes	GO:0001525(angiogenesis),GO:0006355(regulation of transcription, DNA-dependent),GO:0006357(regulation of transcription from RNA polymerase II promoter),GO:0030097(hemopoiesis),GO:0030217(T cell differentiation),GO:0030218(erythrocyte differentiation),GO:0043010(camera-type eye development),GO:0045944(positive regulation of transcription from RNA polymerase II promoter),GO:0005634(nucleus),GO:0005…	NA
ENSGALT00000015972	chr4	88066861	88164601	1	ENSGALG00000015995	PTPA	receptor-type tyrosine-protein phosphatase alpha precursor [Source:RefSeq peptide;Acc:NP_990485]	33.8125	26.1652	23.4504	47.17	45.3973	37.3197	27.8094	43.2956	down	1.55687	-0.638651	0.0233889	0.0508177	yes	GO:0006468(protein phosphorylation),GO:0006470(protein dephosphorylation),GO:0008286(insulin receptor signaling pathway),GO:0016311(dephosphorylation),GO:0035335(peptidyl-tyrosine dephosphorylation),GO:0004721(phosphoprotein phosphatase activity),GO:0004725(protein tyrosine phosphatase activity),GO:0005515(protein binding),GO:0016787(hydrolase activity),GO:0016791(phosphatase activity)	NA
ENSGALT00000037704	chr3	40170700	40178161	1	ENSGALG00000011182	DLL1	Gallus gallus delta-like 1 (Drosophila) (DLL1), mRNA. [Source:RefSeq mRNA;Acc:NM_204973]	24.0356	14.2994	20.2005	26.3496	34.6304	30.0856	19.5118	30.3552	down	1.55573	-0.637596	0.044524	0.0501945	yes	GO:0001756(somitogenesis),GO:0001757(somite specification),GO:0001947(heart looping),GO:0007154(cell communication),GO:0007219(Notch signaling pathway),GO:0007267(cell-cell signaling),GO:0007275(multicellular organismal development),GO:0007368(determination of left/right symmetry),GO:0007386(compartment pattern specification),GO:0045596(negative regulation of cell differentiation),GO:0045608(nega…	04330(Notch signaling pathway)
ENSGALT00000022435	chr3	53319194	53342807	-1	ENSGALG00000013824	HECA	headcase homolog (Drosophila) [Source:HGNC Symbol;Acc:21041]	32.8811	28.1089	38.3831	61.4492	45.6304	47.1526	33.1243	51.4107	down	1.55205	-0.634177	0.0470434	0.0500446	yes	()	NA
ENSGALT00000006456	chr14	2320568	2331815	1	ENSGALG00000004058	GPR146	Gallus gallus G protein-coupled receptor 146 (GPR146), transcript variant 2, mRNA. [Source:RefSeq mRNA;Acc:NM_001277534]	13.6498	15.4581	15.262	11.742	9.31593	7.60917	14.79	9.55572	up	1.54776	0.630183	0.0316458	0.051335	yes	GO:0007186(G-protein coupled receptor signaling pathway),GO:0016021(integral to membrane),GO:0004930(G-protein coupled receptor activity)	NA
ENSGALT00000026181	chr1	111568866	111602294	1	ENSGALG00000016238	MED14	mediator complex subunit 14 [Source:HGNC Symbol;Acc:2370]	6.31341	6.37417	6.9551	9.51732	9.77324	11.0654	6.54756	10.1187	down	1.54541	-0.62799	0.00877924	0.0484209	yes	GO:0006357(regulation of transcription from RNA polymerase II promoter),GO:0006367(transcription initiation from RNA polymerase II promoter),GO:0019827(stem cell maintenance),GO:0030518(intracellular steroid hormone receptor signaling pathway),GO:0030521(androgen receptor signaling pathway),GO:0045893(positive regulation of transcription, DNA-dependent),GO:0045944(positive regulation of transcrip…	NA
ENSGALT00000025774	chr4	88066861	88164601	1	ENSGALG00000015995	PTPA	receptor-type tyrosine-protein phosphatase alpha precursor [Source:RefSeq peptide;Acc:NP_990485]	32.5119	24.9287	22.1868	44.4389	43.9148	34.6954	26.5424	41.0164	down	1.54531	-0.627899	0.0307057	0.0513193	yes	GO:0006468(protein phosphorylation),GO:0006470(protein dephosphorylation),GO:0008286(insulin receptor signaling pathway),GO:0016311(dephosphorylation),GO:0035335(peptidyl-tyrosine dephosphorylation),GO:0004721(phosphoprotein phosphatase activity),GO:0004725(protein tyrosine phosphatase activity),GO:0005515(protein binding),GO:0016787(hydrolase activity),GO:0016791(phosphatase activity)	NA
ENSGALT00000000614	chr5	117890	133597	-1	ENSGALG00000000453	NUP160	nucleoporin 160kDa [Source:HGNC Symbol;Acc:18017]	12.9922	14.2101	12.0177	21.0157	20.2769	19.2282	13.0733	20.1736	down	1.54311	-0.625841	0.00115812	0.0518981	yes	GO:0006406(mRNA export from nucleus),GO:0000776(kinetochore),GO:0005643(nuclear pore),GO:0005487(nucleocytoplasmic transporter activity),GO:0005515(protein binding)	03013(RNA transport)
ENSGALT00000014915	chr5	25131814	25159859	-1	ENSGALG00000009156	CDAN1	codanin 1 [Source:HGNC Symbol;Acc:1713]	8.72338	5.23208	7.25235	10.1825	11.833	10.6885	7.06927	10.9013	down	1.54207	-0.624869	0.044752	0.050058	yes	GO:0008156(negative regulation of DNA replication),GO:0031497(chromatin assembly),GO:0005634(nucleus),GO:0005737(cytoplasm),GO:0005515(protein binding)	NA
ENSGALT00000009239	chr4	2417943	2420697	-1	ENSGALG00000005753	NCBP2	Gallus gallus nuclear cap binding protein subunit 2, 20kDa (LOC422214), mRNA. [Source:RefSeq mRNA;Acc:NM_001006430]	27.8739	20.5589	28.5563	35.5082	36.5201	46.6484	25.6631	39.5589	down	1.54147	-0.624309	0.038677	0.049609	yes	GO:0000184(nuclear-transcribed mRNA catabolic process, nonsense-mediated decay),GO:0006370(7-methylguanosine mRNA capping),GO:0006397(mRNA processing),GO:0006417(regulation of translation),GO:0006810(transport),GO:0008380(RNA splicing),GO:0031047(gene silencing by RNA),GO:0045292(mRNA cis splicing, via spliceosome),GO:0051028(mRNA transport),GO:0005634(nucleus),GO:0005737(cytoplasm),GO:0005846(nu…	03040(Spliceosome),03013(RNA transport),03015(mRNA surveillance pathway)
ENSGALT00000023339	chr1	76468778	76489284	-1	ENSGALG00000013565	CHD4	chromodomain helicase DNA binding protein 4 [Source:HGNC Symbol;Acc:1919]	34.0856	20.7575	30.3616	43.5881	47.2573	40.3061	28.4015	43.7172	down	1.53925	-0.622231	0.0420207	0.0506367	yes	GO:0006355(regulation of transcription, DNA-dependent),GO:0005634(nucleus),GO:0005813(centrosome),GO:0005737(cytoplasm),GO:0043234(protein complex),GO:0016581(NuRD complex),GO:0003676(nucleic acid binding),GO:0003677(DNA binding),GO:0004386(helicase activity),GO:0005524(ATP binding),GO:0008026(ATP-dependent helicase activity),GO:0008270(zinc ion binding),GO:0016818(hydrolase activity, acting on a…	05203(Viral carcinogenesis)
ENSGALT00000042835	chr1	14916517	15054085	1	ENSGALG00000028853	SLC2A13	solute carrier family 2 (facilitated glucose transporter), member 13 [Source:HGNC Symbol;Acc:15956]	8.1046	5.77021	6.18762	10.4442	10.3558	10.0648	6.68747	10.2883	down	1.53844	-0.621468	0.0348102	0.0508328	yes	GO:0006810(transport),GO:0055085(transmembrane transport),GO:0007275(multicellular organismal development),GO:0016020(membrane),GO:0016021(integral to membrane),GO:0005215(transporter activity),GO:0022857(transmembrane transporter activity),GO:0022891(substrate-specific transmembrane transporter activity),GO:0004872(receptor activity)	NA
ENSGALT00000038558	chr15	7694530	7703313	-1	ENSGALG00000005778	novel gene	Uncharacterized protein [Source:UniProtKB/TrEMBL;Acc:F1P2V7]	3.39841	2.18226	2.6328	4.65031	4.37924	3.5955	2.73782	4.20835	down	1.53711	-0.620224	0.0371139	0.0501143	yes	GO:0006810(transport),GO:0055085(transmembrane transport),GO:0016020(membrane),GO:0016021(integral to membrane),GO:0005215(transporter activity),GO:0022857(transmembrane transporter activity),GO:0022891(substrate-specific transmembrane transporter activity)	NA
ENSGALT00000016501	chr3	29507702	29516057	1	ENSGALG00000010151	CCDC167	Gallus gallus coiled-coil domain containing 167 (CCDC167), mRNA. [Source:RefSeq mRNA;Acc:NM_001277596]	14.1028	9.4711	15.8462	21.9774	19.9497	18.6491	13.14	20.1921	down	1.53669	-0.619821	0.0462445	0.050011	yes	()	NA
ENSGALT00000004909	chr21	4897971	4906221	1	ENSGALG00000003109	PINK1	PTEN induced putative kinase 1 [Source:HGNC Symbol;Acc:14581]	14.5832	11.2655	13.4084	20.8229	22.1788	17.1829	13.0857	20.0616	down	1.53309	-0.616441	0.0229909	0.0507215	yes	GO:0006468(protein phosphorylation),GO:0000422(mitochondrion degradation),GO:0090200(positive regulation of release of cytochrome c from mitochondria),GO:0043254(regulation of protein complex assembly),GO:0031396(regulation of protein ubiquitination),GO:0018105(peptidyl-serine phosphorylation),GO:0006950(response to stress),GO:0035556(intracellular signal transduction),GO:0043123(positive regulat…	05012(Parkinson's disease)
ENSGALT00000012305	chr13	17544377	17554780	-1	ENSGALG00000007610	CDC23	cell division cycle 23 [Source:HGNC Symbol;Acc:1724]	9.45544	6.86338	8.15768	13.8719	12.4656	11.163	8.15883	12.5002	down	1.5321	-0.615513	0.0160504	0.0555949	yes	GO:0030071(regulation of mitotic metaphase/anaphase transition),GO:0000080(mitotic G1 phase),GO:0007080(mitotic metaphase plate congression),GO:0070979(protein K11-linked ubiquitination),GO:0007067(mitosis),GO:0005680(anaphase-promoting complex),GO:0005622(intracellular),GO:0005515(protein binding)	04120(Ubiquitin mediated proteolysis),04110(Cell cycle),04111(Cell cycle - yeast),04113(Meiosis - yeast),04114(Oocyte meiosis),04914(Progesterone-mediated oocyte maturation),05166(HTLV-I infection)
ENSGALT00000002629	chr17	8154246	8170074	1	ENSGALG00000001713	UBAC1	Gallus gallus UBA domain containing 1 (UBAC1), mRNA. [Source:RefSeq mRNA;Acc:NM_001031474]	13.5962	16.0025	18.2204	25.3389	26.9813	20.8832	15.9397	24.4011	down	1.53084	-0.614322	0.02337	0.0510863	yes	GO:0005794(Golgi apparatus),GO:0005737(cytoplasm),GO:0005886(plasma membrane),GO:0005515(protein binding)	NA
ENSGALT00000017613	chr3	36890573	36933337	-1	ENSGALG00000014464	MTR	Gallus gallus 5-methyltetrahydrofolate-homocysteine methyltransferase (MTR), mRNA. [Source:RefSeq mRNA;Acc:NM_001031104]	18.0254	12.9639	12.808	26.1241	19.378	21.4094	14.5991	22.3038	down	1.52775	-0.611411	0.0441715	0.0500331	yes	GO:0009086(methionine biosynthetic process),GO:0042558(pteridine-containing compound metabolic process),GO:0044237(cellular metabolic process),GO:0005622(intracellular),GO:0005737(cytoplasm),GO:0008270(zinc ion binding),GO:0008705(methionine synthase activity),GO:0008898(homocysteine S-methyltransferase activity),GO:0031419(cobalamin binding),GO:0046872(metal ion binding)	01230(Biosynthesis of amino acids),00270(Cysteine and methionine metabolism),00450(Selenocompound metabolism),00670(One carbon pool by folate)
ENSGALT00000011898	chr9	14257892	14274166	1	ENSGALG00000007357	BCL6	Gallus gallus B-cell CLL/lymphoma 6 (BCL6), mRNA. [Source:RefSeq mRNA;Acc:NM_001012930]	43.104	52.6534	48.4096	31.4364	30.2768	32.7327	48.0523	31.482	up	1.52634	0.610959	0.0336445	0.0492	yes
ENSGALT00000044027	chr1	167058420	167066619	-1	ENSGALG00000028872	TPT1	Gallus gallus tumor protein, translationally-controlled 1 (TPT1), mRNA. [Source:RefSeq mRNA;Acc:NM_205398]	46.8293	40.7643	49.5889	74.3018	70.9023	63.9294	45.7275	69.7112	down	1.52449	-0.608327	0.0042588	0.0484691	yes	GO:0009615(response to virus),GO:0019827(stem cell maintenance),GO:2000384(negative regulation of ectoderm development),GO:1902230(negative regulation of intrinsic apoptotic signaling pathway in response to DNA damage),GO:0005615(extracellular space),GO:0005654(nucleoplasm),GO:0005737(cytoplasm),GO:0005771(multivesicular body),GO:0045298(tubulin complex),GO:0005634(nucleus),GO:0005509(calcium ion…	NA
ENSGALT00000016509	chrZ	25582286	25666831	1	ENSGALG00000010156	DOCK8	dedicator of cytokinesis 8 [Source:HGNC Symbol;Acc:19191]	31.3964	20.015	27.2233	45.7173	39.7421	34.2991	26.2116	39.9195	down	1.52297	-0.606888	0.0429176	0.0507787	yes	GO:0007264(small GTPase mediated signal transduction),GO:0005085(guanyl-nucleotide exchange factor activity),GO:0005488(binding),GO:0005515(protein binding)	NA
ENSGALT00000007880	chr14	4981261	4986627	-1	ENSGALG00000004926	ATPAF2	ATP synthase mitochondrial F1 complex assembly factor 2 [Source:HGNC Symbol;Acc:18802]	10.8408	8.80549	8.7431	4.81578	6.61946	7.23711	9.46314	6.22412	up	1.5204	0.60445	0.0319509	0.0506832	yes	GO:0043461(proton-transporting ATP synthase complex assembly),GO:0005739(mitochondrion),GO:0016607(nuclear speck),GO:0005515(protein binding)	NA
ENSGALT00000005665	chr28	3878507	3912897	-1	ENSGALG00000003579	CTK-1	Tyrosine-protein kinase receptor [Source:UniProtKB/TrEMBL;Acc:F1NJT2]	24.4385	22.4538	22.0723	15.3946	16.8291	13.1546	22.9882	15.1261	up	1.51977	0.603851	0.00548991	0.0468603	yes	GO:0006468(protein phosphorylation),GO:0007169(transmembrane receptor protein tyrosine kinase signaling pathway),GO:0016310(phosphorylation),GO:0018108(peptidyl-tyrosine phosphorylation),GO:0046777(protein autophosphorylation),GO:0000187(activation of MAPK activity),GO:0001934(positive regulation of protein phosphorylation),GO:0003007(heart morphogenesis),GO:0006355(regulation of transcription, D…	04014(Ras signaling pathway),04066(HIF-1 signaling pathway),04151(PI3K-Akt signaling pathway),04520(Adherens junction),04910(Insulin signaling pathway),04913(Ovarian Steroidogenesis),04960(Aldosterone-regulated sodium reabsorption),04930(Type II diabetes mellitus),04932(Non-alcoholic fatty liver disease (NAFLD))
ENSGALT00000027423	chr1	166717963	166795566	-1	ENSGALG00000016971	TSC22D1	Gallus gallus TSC22 domain family, member 1 (TSC22D1), transcript variant 2, mRNA. [Source:RefSeq mRNA;Acc:NM_205111]	22.2021	23.6216	17.5553	36.8286	31.4722	27.9476	21.1263	32.0828	down	1.51862	-0.602757	0.0304213	0.0510821	yes	GO:0006355(regulation of transcription, DNA-dependent),GO:0003700(sequence-specific DNA binding transcription factor activity),GO:0008284(positive regulation of cell proliferation),GO:0043066(negative regulation of apoptotic process),GO:0043065(positive regulation of apoptotic process),GO:0005737(cytoplasm),GO:0005634(nucleus),GO:0005515(protein binding)	NA
ENSGALT00000008981	chr14	6192571	6207371	-1	ENSGALG00000005598	ZNF598	zinc finger protein 598 [Source:HGNC Symbol;Acc:28079]	13.1353	10.6544	9.43941	18.7096	14.4296	17.2361	11.0764	16.7918	down	1.516	-0.600265	0.0271196	0.0509025	yes	GO:0006355(regulation of transcription, DNA-dependent),GO:0005634(nucleus),GO:0008270(zinc ion binding),GO:0046872(metal ion binding),GO:0005515(protein binding)	NA
ENSGALT00000005822	chr1	6143197	6160464	1	ENSGALG00000003674	DHTKD1	dehydrogenase E1 and transketolase domain containing 1 [Source:HGNC Symbol;Acc:23537]	3.14077	3.88407	3.871	6.00497	5.23029	5.27157	3.63195	5.50227	down	1.51497	-0.599285	0.00601961	0.0474292	yes	GO:0006099(tricarboxylic acid cycle),GO:0008152(metabolic process),GO:0055114(oxidation-reduction process),GO:0006091(generation of precursor metabolites and energy),GO:0005739(mitochondrion),GO:0004591(oxoglutarate dehydrogenase (succinyl-transferring) activity),GO:0016624(oxidoreductase activity, acting on the aldehyde or oxo group of donors, disulfide as acceptor),GO:0030976(thiamine pyrophosp…	NA
ENSGALT00000018177	chr2	34036516	34038789	-1	ENSGALG00000011145	TRIL	TLR4 interactor with leucine rich repeats [Source:HGNC Symbol;Acc:HGNC:22200].	2.01657	2.80945	2.991	4.29243	4.04223	3.50577	2.60567	3.94681	down	1.5147	-0.599033	0.0264652	0.0510095	yes	GO:0005515(protein binding)	NA
ENSGALT00000003619	chr11	1405351	1453089	-1	ENSGALG00000002301	CNOT1	Gallus gallus CCR4-NOT transcription complex subunit 1-like (CNOT1), mRNA. [Source:RefSeq mRNA;Acc:NM_001277133]	51.7824	46.3938	43.3189	79.7223	69.168	65.3334	47.165	71.4079	down	1.514	-0.598367	0.0141728	0.0534838	yes	GO:0005488(binding)	03018(RNA degradation)
ENSGALT00000006170	chr8	5790975	5804968	1	ENSGALG00000003880	STX6	Gallus gallus syntaxin 6 (STX6), mRNA. [Source:RefSeq mRNA;Acc:NM_001006531]	17.9191	18.1989	21.9721	24.0463	32.5533	31.2277	19.3634	29.2758	down	1.51191	-0.596375	0.0453787	0.0500561	yes	GO:0006810(transport),GO:0006886(intracellular protein transport),GO:0006906(vesicle fusion),GO:0007032(endosome organization),GO:0015031(protein transport),GO:0016192(vesicle-mediated transport),GO:0042147(retrograde transport, endosome to Golgi),GO:0048193(Golgi vesicle transport),GO:0000139(Golgi membrane),GO:0005769(early endosome),GO:0005794(Golgi apparatus),GO:0005802(trans-Golgi network),G…	04130(SNARE interactions in vesicular transport)
ENSGALT00000036492	chr1	166718440	166796154	-1	ENSGALG00000016971	TSC22D1	Gallus gallus TSC22 domain family, member 1 (TSC22D1), transcript variant 2, mRNA. [Source:RefSeq mRNA;Acc:NM_205111]	14.2907	22.6909	16.7379	27.1825	29.9384	24.0081	17.9065	27.043	down	1.51024	-0.594773	0.0458276	0.0500128	yes	GO:0006355(regulation of transcription, DNA-dependent),GO:0003700(sequence-specific DNA binding transcription factor activity),GO:0008284(positive regulation of cell proliferation),GO:0043066(negative regulation of apoptotic process),GO:0043065(positive regulation of apoptotic process),GO:0005737(cytoplasm),GO:0005634(nucleus),GO:0005515(protein binding)	NA
ENSGALT00000022003	chrZ	24576663	24583685	1	ENSGALG00000013511	ANKRA2	Gallus gallus ankyrin repeat, family A (RFXANK-like), 2 (ANKRA2), mRNA. [Source:RefSeq mRNA;Acc:NM_001006565]	8.87567	7.8086	7.5786	13.5149	13.0099	10.0972	8.08762	12.2073	down	1.50938	-0.593961	0.04704	0.0501154	yes	GO:0005634(nucleus),GO:0005737(cytoplasm),GO:0005829(cytosol),GO:0016020(membrane),GO:0030169(low-density lipoprotein particle binding),GO:0042826(histone deacetylase binding),GO:0005515(protein binding)	NA
ENSGALT00000045084	chr10	18641302	18648029	1	ENSGALG00000028906	FEM1B	Gallus gallus fem-1 homolog b (C. elegans) (FEM1B), mRNA. [Source:RefSeq mRNA;Acc:NM_001030553]	17.5114	26.4922	25.0867	33.7773	37.3044	33.1831	23.0301	34.755	down	1.50911	-0.5937	0.0353644	0.0507126	yes	GO:2000001(regulation of DNA damage checkpoint),GO:0051438(regulation of ubiquitin-protein ligase activity),GO:1902041(regulation of extrinsic apoptotic signaling pathway via death domain receptors),GO:0016567(protein ubiquitination),GO:0060442(branching involved in prostate gland morphogenesis),GO:0002070(epithelial cell maturation),GO:0060743(epithelial cell maturation involved in prostate glan…	NA
ENSGALT00000006533	chr6	10323519	10347963	1	ENSGALG00000004108	CCAR1	cell division cycle and apoptosis regulator 1 [Source:HGNC Symbol;Acc:24236]	25.4686	21.0364	20.7266	38.7482	29.4191	33.2767	22.4105	33.8147	down	1.50887	-0.593472	0.0321094	0.0502674	yes	GO:0006915(apoptotic process),GO:0003676(nucleic acid binding),GO:0030374(ligand-dependent nuclear receptor transcription coactivator activity),GO:0005515(protein binding)	NA
ENSGALT00000009065	chr11	16304442	16316647	1	ENSGALG00000005651	KLHL36	kelch-like family member 36 [Source:HGNC Symbol;Acc:17844]	9.62791	12.168	12.7888	19.2042	17.7912	15.1699	11.5282	17.3884	down	1.50833	-0.592956	0.0198648	0.0527521	yes	GO:0005515(protein binding)	NA
ENSGALT00000024619	chrZ	49867167	49940749	-1	ENSGALG00000015256	PAM	peptidylglycine alpha-amidating monooxygenase [Source:HGNC Symbol;Acc:8596]	2.69587	4.17749	4.30156	6.175	5.38727	5.24445	3.72497	5.60224	down	1.50397	-0.588774	0.047137	0.0499959	yes	GO:0006518(peptide metabolic process),GO:0055114(oxidation-reduction process),GO:0016020(membrane),GO:0003824(catalytic activity),GO:0004497(monooxygenase activity),GO:0004504(peptidylglycine monooxygenase activity),GO:0005507(copper ion binding),GO:0016715(oxidoreductase activity, acting on paired donors, with incorporation or reduction of molecular oxygen, reduced ascorbate as one donor, and in…	NA
ENSGALT00000024904	chr1	90911605	90946738	-1	ENSGALG00000015440	RCSD1	Gallus gallus RCSD domain containing 1 (RCSD1), mRNA. [Source:RefSeq mRNA;Acc:NM_001030789]	46.9414	43.9541	50.6655	34.6067	32.8874	26.7322	47.187	31.4088	up	1.50235	0.587221	0.00766856	0.0486581	yes	GO:0071474(cellular hyperosmotic response),GO:0051015(actin filament binding)	NA
ENSGALT00000007033	chr18	9185411	9245846	-1	ENSGALG00000004413	SLC39A11	solute carrier family 39, member 11 [Source:HGNC Symbol;Acc:14463]	10.7856	12.1439	9.54007	5.90587	8.92511	6.79188	10.8232	7.20762	up	1.50163	0.58653	0.038022	0.0496571	yes	GO:0030001(metal ion transport),GO:0055085(transmembrane transport),GO:0016020(membrane),GO:0046873(metal ion transmembrane transporter activity)	NA
ENSGALT00000011612	chr10	17115825	17120836	-1	ENSGALG00000007170	SNRPA1	Gallus gallus small nuclear ribonucleoprotein polypeptide A' (SNRPA1), mRNA. [Source:RefSeq mRNA;Acc:NM_001005823]	39.3597	41.0733	35.4246	22.23	25.8888	29.0765	38.6192	25.7318	up	1.50084	0.585768	0.00817917	0.0492812	yes	GO:0005681(spliceosomal complex),GO:0071013(catalytic step 2 spliceosome),GO:0005515(protein binding)	03040(Spliceosome)
ENSGALT00000006200	chr15	5425109	5431053	1	ENSGALG00000003901	P2RX4	Gallus gallus purinergic receptor P2X, ligand-gated ion channel, 4 (P2RX4), mRNA. [Source:RefSeq mRNA;Acc:NM_204291]	29.1317	32.9056	29.1896	20.6962	18.6282	21.4795	30.409	20.268	up	1.50035	0.585296	0.00397259	0.048277	yes	GO:0006810(transport),GO:0006811(ion transport),GO:0035590(purinergic nucleotide receptor signaling pathway),GO:0006816(calcium ion transport),GO:0060079(regulation of excitatory postsynaptic membrane potential),GO:0006809(nitric oxide biosynthetic process),GO:0042311(vasodilation),GO:0016020(membrane),GO:0016021(integral to membrane),GO:0045177(apical part of cell),GO:0001614(purinergic nucleoti…	04020(Calcium signaling pathway),04080(Neuroactive ligand-receptor interaction)

## Sheet: Table S3 
transcript_id	chr	start	end	strand	gene_id	gene_novel geneme	annotation	C1p_C_fpkm	C2p_C_fpkm	C3p_C_fpkm	R1p_R_fpkm	R2p_R_fpkm	R3p_R_fpkm	mean_fpkm_R	mean_fpkm_C	regulation	log2fold_change	FC	pvalue	FDR	significant	go	kegg
ENSGALT00000037516	chrZ	73394947	73689557	-1	ENSGALG00000023044	novel gene	Uncharacterized protein [Source:UniProtKB/TrEMBL;Acc:E1C7X6]	0.01	0.01	0.01	3.65228	2.20578	1.72596	2.52801	0.01	up	7.98186	252.801	0.0486518	0.0499254	yes	()	NA
ENSGALT00000023372	chr4	75524898	75546434	1	ENSGALG00000014479	FAM184B	family with sequence similarity 184, member B [Source:HGNC Symbol;Acc:29235]	0.01	0.01	0.01	0.961203	1.07676	1.04198	1.02665	0.01	up	6.6818	102.665	0.00110969	0.0869994	yes	GO:0000166(nucleotide binding),GO:0003676(nucleic acid binding)	NA
ENSGALT00000034654	chr10	3122061	3127878	1	ENSGALG00000003014	CHR3	Gallus gallus cholinergic receptor, nicotinic, alpha 3 (CHRNA3), mRNA. [Source:RefSeq mRNA;Acc:NM_204416]	0.01	0.01	0.01	0.712237	1.07538	1.12194	0.969853	0.01	up	6.59969	96.9853	0.017368	0.0602499	yes	GO:0006184(GTP catabolic process),GO:0007165(signal transduction),GO:0007264(small GTPase mediated signal transduction),GO:0015031(protein transport),GO:0016020(membrane),GO:0005737(cytoplasm),GO:0005622(intracellular),GO:0000166(nucleotide binding),GO:0003924(GTPase activity),GO:0005525(GTP binding)	NA
ENSGALT00000002918	chr18	4283804	4289327	1	ENSGALG00000001883	ST6GALC2	Gallus gallus ST6 (alpha-N-acetyl-neuraminyl-2,3-beta-galactosyl-1, 3)-N-acetylgalactosaminide alpha-2,6-sialyltransferase 2 (ST6GALNAC2), mRNA. [Source:RefSeq mRNA;Acc:NM_205233]	0.01	0.01	0.01	0.706364	0.639908	0.741794	0.696022	0.01	up	6.12106	69.6022	0.00183579	0.0514022	yes	GO:0005765(lysosomal membrane),GO:0005515(protein binding)	04014(Ras signaling pathway),04151(PI3K-Akt signaling pathway),04062(Chemokine signaling pathway),04724(Glutamatergic synapse),04727(GABAergic synapse),04725(Cholinergic synapse),04728(Dopaminergic synapse),04726(Serotonergic synapse),04723(Retrograde endocannabinoid signaling),04713(Circadian entrainment),05032(Morphine addiction),05034(Alcoholism)
ENSGALT00000022224	chr25	855666	856082	1	ENSGALG00000013664	LOC771082	claw keratin-like	0.01	0.01	0.01	0.677906	0.682364	0.474606	0.611625	0.01	up	5.93458	61.1625	0.0123198	0.0555098	yes	GO:0006887(exocytosis),GO:0000145(exocyst),GO:0005815(microtubule organizing center),GO:0032584(growth cone membrane),GO:0034451(centriolar satellite),GO:0005515(protein binding)	04910(Insulin signaling pathway)
ENSGALT00000035163	chr19	831531	838160	-1	ENSGALG00000001095	novel gene	Uncharacterized protein [Source:UniProtKB/TrEMBL;Acc:F1NVZ8]	0.01	0.01	0.01	0.618448	0.339553	0.354255	0.437419	0.01	up	5.45094	43.7419	0.040335	0.0511693	yes	GO:0008152(metabolic process),GO:0048839(inner ear development),GO:0016020(membrane),GO:0003824(catalytic activity),GO:0005515(protein binding)	NA
ENSGALT00000012824	chr9	15076205	15079396	1	ENSGALG00000007899	CHRND	Gallus gallus cholinergic receptor, nicotinic, delta (CHRND), mRNA. [Source:RefSeq mRNA;Acc:NM_001031317]	0.01	0.01	0.01	0.427758	0.553591	0.320867	0.434072	0.01	up	5.43986	43.4072	0.0231757	0.0582363	yes	GO:0032581(ER-dependent peroxisome organization),GO:0022615(protein to membrane docking),GO:0016557(peroxisome membrane biogenesis),GO:0007031(peroxisome organization),GO:0045046(protein import into peroxisome membrane),GO:0070972(protein localization to endoplasmic reticulum),GO:0016558(protein import into peroxisome matrix),GO:0006625(protein targeting to peroxisome),GO:0005778(peroxisomal memb…	04146(Peroxisome)
ENSGALT00000008374	chr2	1146175	1164231	1	ENSGALG00000005212	GHRHR	Gallus gallus growth hormone releasing hormone receptor (GHRHR), transcript variant 1, mRNA. [Source:RefSeq mRNA;Acc:NM_001037834]	0.01	0.01	0.01	0.216245	0.489752	0.454184	0.386727	0.01	up	5.27324	38.6727	0.0459198	0.0507058	yes	GO:0005576(extracellular region)	NA
ENSGALT00000019845	chr2	47818323	47850665	1	ENSGALG00000012151	TBX20	Gallus gallus T-box 20 (TBX20), mRNA. [Source:RefSeq mRNA;Acc:NM_204144]	0.01	0.01	0.01	0.213671	0.215076	0.299185	0.242644	0.01	up	4.60077	24.2644	0.0133069	0.05861	yes	()	NA
ENSGALT00000043137	chr17	4929865	4931968	-1	ENSGALG00000004992	TTC16	tetratricopeptide repeat domain 16 [Source:HGNC Symbol;Acc:26536]	0.01	0.01	0.01	0.322702	0.162412	0.225925	0.237013	0.01	up	4.56689	23.7013	0.0365545	0.0526815	yes	GO:0006184(GTP catabolic process),GO:0007264(small GTPase mediated signal transduction),GO:0015031(protein transport),GO:0030100(regulation of endocytosis),GO:0006886(intracellular protein transport),GO:0006913(nucleocytoplasmic transport),GO:0007165(signal transduction),GO:0019882(antigen processing and presentation),GO:0005737(cytoplasm),GO:0005768(endosome),GO:0005622(intracellular),GO:0005634…	04144(Endocytosis)
ENSGALT00000026450	chr3	94589239	94594293	1	ENSGALG00000016400	RSAD2	Uncharacterized protein; Viperin [Source:UniProtKB/TrEMBL;Acc:F1NLJ6]	0.01	0.531139	0.548941	3.9815	7.34743	5.38912	5.57268	0.360027	up	3.9522	15.4785	0.0298455	0.0562473	yes	()	NA
ENSGALT00000005381	chr27	4763260	4797776	-1	ENSGALG00000003403	ZNF385C	zinc finger protein 385C [Source:HGNC Symbol;Acc:33722]	0.01	0.01	0.01	0.130061	0.098187	0.204876	0.144375	0.01	up	3.85175	14.4375	0.0447683	0.0511637	yes	GO:0000160(phosphorelay signal transduction system),GO:0006810(transport),GO:0006811(ion transport),GO:0006813(potassium ion transport),GO:0007165(signal transduction),GO:0023014(signal transduction by phosphorylation),GO:0042391(regulation of membrane potential),GO:0055085(transmembrane transport),GO:0071805(potassium ion transmembrane transport),GO:0005887(integral to plasma membrane),GO:001602…	NA
ENSGALT00000040054	chr7	2739204	2746489	-1	ENSGALG00000002907	MYL1	Myosin light chain 1, skeletal muscle isoform [Source:UniProtKB/Swiss-Prot;Acc:P02604]	0.01	0.01	0.01	0.118527	0.17896	0.124472	0.140653	0.01	up	3.81407	14.0653	0.0181841	0.0599007	yes	GO:0016310(phosphorylation),GO:0032957(inositol trisphosphate metabolic process),GO:0005622(intracellular),GO:0000166(nucleotide binding),GO:0000287(magnesium ion binding),GO:0005524(ATP binding),GO:0016301(kinase activity),GO:0016740(transferase activity),GO:0016853(isomerase activity),GO:0046872(metal ion binding),GO:0047325(inositol tetrakisphosphate 1-kinase activity),GO:0052725(inositol-1,3,…	00562(Inositol phosphate metabolism),04070(Phosphatidylinositol signaling system)
ENSGALT00000003855	chrZ	9023591	9024768	1	ENSGALG00000023622	AVD	Gallus gallus avidin (AVD), mRNA. [Source:RefSeq mRNA;Acc:NM_205320]	5.46896	9.47632	7.48814	81.7622	85.3149	83.1429	83.4066	7.4778	up	3.47948	11.1539	1.19875e-06	0.000469911	yes	GO:0006810(transport),GO:0015671(oxygen transport),GO:0005833(hemoglobin complex),GO:0005344(oxygen transporter activity),GO:0005506(iron ion binding),GO:0019825(oxygen binding),GO:0020037(heme binding),GO:0030492(hemoglobin binding),GO:0046872(metal ion binding)	NA
ENSGALT00000018891	chrZ	42697105	42766343	-1	ENSGALG00000023179	CNTP4	contactin associated protein-like 4	0.01	0.01	0.01	0.108123	0.122438	0.0851595	0.10524	0.01	up	3.39561	10.524	0.0104768	0.0540381	yes	GO:0000166(nucleotide binding),GO:0003676(nucleic acid binding)	NA
ENSGALT00000044440	chr10	1932504	1933601	1	ENSGALG00000028859	novel gene	Uncharacterized protein [Source:UniProtKB/TrEMBL;Acc:R4GIZ4]	0.01	0.128794	0.193616	0.858187	1.16617	0.630863	0.885074	0.10747	up	3.04186	8.23555	0.0263315	0.0576645	yes	GO:0008270(zinc ion binding)	NA
ENSGALT00000045453	chr13	9685099	9687474	1	ENSGALG00000026185	GPRIN1	G protein regulated inducer of neurite outgrowth 1 [Source:HGNC Symbol;Acc:24835]	0.01	0.187058	0.175752	1.05945	1.03505	0.78536	0.959955	0.120937	up	2.98871	7.93766	0.00225085	0.0551459	yes	GO:0006397(mRNA processing),GO:0050658(RNA transport),GO:0048025(negative regulation of mRNA splicing, via spliceosome),GO:0005634(nucleus),GO:0005681(spliceosomal complex),GO:0005730(nucleolus),GO:0030529(ribonucleoprotein complex),GO:0071013(catalytic step 2 spliceosome),GO:0000166(nucleotide binding),GO:0003676(nucleic acid binding),GO:0003723(RNA binding),GO:0043047(single-stranded telomeric …	NA
ENSGALT00000033625	chr9	4375581	4381422	1	ENSGALG00000020943	AGXT	alanine-glyoxylate aminotransferase [Source:HGNC Symbol;Acc:341]	0.01	0.231992	0.112099	0.839161	0.933593	0.695725	0.822826	0.114697	up	2.84276	7.1739	0.00182696	0.0550899	yes	GO:0007155(cell adhesion),GO:0007163(establishment or maintenance of cell polarity),GO:0007406(negative regulation of neuroblast proliferation),GO:0042127(regulation of cell proliferation),GO:0043066(negative regulation of apoptotic process),GO:0043297(apical junction assembly),GO:0045880(positive regulation of smoothened signaling pathway),GO:0071681(cellular response to indole-3-methanol),GO:00…	04390(Hippo signaling pathway),04520(Adherens junction),04530(Tight junction),04670(Leucyte transendothelial migration),05200(Pathways in cancer),05213(Endometrial cancer),05412(Arrhythmogenic right ventricular cardiomyopathy (ARVC)),05100(Bacterial invasion of epithelial cells)
ENSGALT00000008674	chr12	7310503	7722064	1	ENSGALG00000005400	CAC2D3	calcium channel, voltage-dependent, alpha 2/delta subunit 3 [Source:HGNC Symbol;Acc:15460]	0.01	0.0549294	0.0206438	0.183004	0.221049	0.134528	0.179527	0.0251911	up	2.83322	7.12663	0.0100799	0.0548796	yes	GO:0007165(signal transduction),GO:0007264(small GTPase mediated signal transduction),GO:0051056(regulation of small GTPase mediated signal transduction),GO:0005622(intracellular),GO:0005085(guanyl-nucleotide exchange factor activity),GO:0005515(protein binding)	NA
ENSGALT00000003615	chr6	2479580	2495928	-1	ENSGALG00000002299	RGR	Gallus gallus retinal G protein coupled receptor (RGR), mRNA. [Source:RefSeq mRNA;Acc:NM_001031216]	0.01	0.150844	0.21259	0.728704	0.986426	0.633314	0.782814	0.121145	up	2.69194	6.46182	0.0100213	0.0553286	yes	GO:0006468(protein phosphorylation),GO:0008284(positive regulation of cell proliferation),GO:0008543(fibroblast growth factor receptor signaling pathway),GO:0016310(phosphorylation),GO:0018108(peptidyl-tyrosine phosphorylation),GO:0060173(limb development),GO:0010863(positive regulation of phospholipase C activity),GO:0043410(positive regulation of MAPK cascade),GO:0046777(protein autophosphoryla…	04014(Ras signaling pathway),04010(MAPK signaling pathway),04151(PI3K-Akt signaling pathway),04810(Regulation of actin cytoskeleton),04520(Adherens junction),05200(Pathways in cancer),05205(Proteoglycans in cancer),05218(Melanoma),05215(Prostate cancer)
ENSGALT00000021107	chr2	73046218	73413333	1	ENSGALG00000012941	CDH12	cadherin 12, type 2 (N-cadherin 2) [Source:HGNC Symbol;Acc:1751]	0.01	0.0584202	0.15369	0.298439	0.607334	0.463299	0.456358	0.0707034	up	2.69031	6.45453	0.031661	0.055906	yes	GO:0005576(extracellular region)	NA
ENSGALT00000038813	chr11	18287877	18288821	1	ENSGALG00000023459	MC1R	Gallus gallus melanocortin 1 receptor (alpha melanocyte stimulating hormone receptor) (MC1R), mRNA. [Source:RefSeq mRNA;Acc:NM_001031462]	0.01	0.448939	0.168722	0.897418	1.35498	1.466	1.23947	0.205887	up	2.5898	6.02013	0.0107675	0.0541136	yes	GO:0005622(intracellular),GO:0005634(nucleus),GO:0016514(SWI/SNF complex),GO:0043231(intracellular membrane-bounded organelle),GO:0003677(DNA binding),GO:0005488(binding),GO:0005515(protein binding)	NA
ENSGALT00000022521	chr2	96404418	96405491	1	ENSGALG00000013891	MC2R	Gallus gallus melanocortin 2 receptor (adrenocorticotropic hormone) (MC2R), mRNA. [Source:RefSeq mRNA;Acc:NM_001031515]	0.01	0.790032	0.247428	1.57926	2.78187	1.84274	2.06796	0.34582	up	2.58011	5.97986	0.0225045	0.0588117	yes	GO:0006810(transport),GO:0006888(ER to Golgi vesicle-mediated transport),GO:0016358(dendrite development),GO:0005801(cis-Golgi network),GO:0005622(intracellular),GO:0008021(synaptic vesicle),GO:0030425(dendrite),GO:0005795(Golgi stack),GO:0045202(synapse),GO:0030008(TRAPP complex),GO:0005515(protein binding)	NA
ENSGALT00000039553	chr14	12661875	12681255	-1	ENSGALG00000007782	SRL	Gallus gallus sarcalumenin (SRL), mRNA. [Source:RefSeq mRNA;Acc:NM_205329]	0.214339	0.0714221	0.161053	0.809036	0.934115	0.849616	0.864256	0.148938	up	2.53675	5.80279	0.00023085	0.0301644	yes	GO:0001649(osteoblast differentiation),GO:0001701(in utero embryonic development),GO:0001764(neuron migration),GO:0001947(heart looping),GO:0002070(epithelial cell maturation),GO:0002088(lens development in camera-type eye),GO:0003294(atrial ventricular junction remodeling),GO:0006915(apoptotic process),GO:0007154(cell communication),GO:0007165(signal transduction),GO:0007267(cell-cell signaling)…	04540(Gap junction),05412(Arrhythmogenic right ventricular cardiomyopathy (ARVC))
ENSGALT00000009261	chr6	17076628	17100353	1	ENSGALG00000005766	PKD2L1	polycystic kidney disease 2-like 1 [Source:HGNC Symbol;Acc:9011]	0.01	0.176549	0.0829393	0.470556	0.444048	0.586814	0.500473	0.0864961	up	2.53258	5.78607	0.00380095	0.0573067	yes	GO:0006606(protein import into nucleus),GO:0005634(nucleus),()	NA
ENSGALT00000033054	chr6	29293819	29294877	-1	ENSGALG00000020656	PRLHR	Gallus gallus prolactin releasing hormone receptor (PRLHR), mRNA. [Source:RefSeq mRNA;Acc:NM_001012295]	0.01	0.133537	0.702611	1.15673	1.47781	1.96229	1.53228	0.278716	up	2.45881	5.49762	0.017186	0.060693	yes	GO:0016180(snRNA processing),GO:0043066(negative regulation of apoptotic process),GO:0043154(negative regulation of cysteine-type endopeptidase activity involved in apoptotic process),GO:0001833(inner cell mass cell proliferation),GO:0001832(blastocyst growth),GO:0034474(U2 snRNA 3'-end processing),GO:0032039(integrator complex),GO:0005634(nucleus),GO:0005488(binding)	NA
ENSGALT00000008525	chr11	12288497	12432361	1	ENSGALG00000005319	CDH8	Gallus gallus cadherin 8, type 2 (CDH8), mRNA. [Source:RefSeq mRNA;Acc:NM_001100289]	0.01	0.387441	0.116488	1.08428	0.818556	0.840442	0.914426	0.167976	up	2.44461	5.44378	0.00798562	0.0539718	yes	GO:0006468(protein phosphorylation),GO:0009103(lipopolysaccharide biosynthetic process),GO:0072577(endothelial cell apoptotic process),GO:0097191(extrinsic apoptotic signaling pathway),GO:0010803(regulation of tumor necrosis factor-mediated signaling pathway),GO:0016926(protein desumoylation),GO:0007224(smoothened signaling pathway),GO:0009952(anterior/posterior pattern specification),GO:0048596(…	NA
ENSGALT00000045558	chr8	23364732	23378739	1	ENSGALG00000028647	FAM159A	family with sequence similarity 159, member A [Source:HGNC Symbol;Acc:28757]	0.01	0.313734	0.6485	1.56787	2.28836	1.37209	1.74277	0.320745	up	2.44189	5.43352	0.0175967	0.0599818	yes	GO:0006468(protein phosphorylation),GO:0070816(phosphorylation of RNA polymerase II C-terminal domain),GO:0030097(hemopoiesis),GO:0000380(alternative mRNA splicing, via spliceosome),GO:0002945(cyclin K-CDK13 complex),GO:0016607(nuclear speck),GO:0019908(nuclear cyclin-dependent protein kinase holoenzyme complex),GO:0000166(nucleotide binding),GO:0004672(protein kinase activity),GO:0004674(protein…	NA
ENSGALT00000014498	chr6	26991279	27037248	-1	ENSGALG00000008914	NRAP	nebulin-related anchoring protein [Source:HGNC Symbol;Acc:7988]	0.01	0.145415	0.100192	0.306829	0.560802	0.423973	0.430535	0.081869	up	2.39474	5.25882	0.0228002	0.058037	yes	GO:0009607(response to biotic stimulus),GO:0030282(bone mineralization),GO:0005886(plasma membrane),GO:0016021(integral to membrane)	NA
ENSGALT00000022870	chr4	66194847	66198930	1	ENSGALG00000014136	CNGA1	Gallus gallus cyclic nucleotide gated channel alpha 1 (CNGA1), mRNA. [Source:RefSeq mRNA;Acc:NM_205220]	0.01	0.07297	0.411358	0.777948	1.10118	0.663787	0.847639	0.161443	up	2.39243	5.2504	0.0197264	0.0590286	yes	GO:0032040(small-subunit processome)	NA
ENSGALT00000043912	chr2	3423479	3455225	-1	ENSGALG00000005448	MYL3	Gallus gallus myosin, light chain 3, alkali; ventricular, skeletal, slow (MYL3), mRNA. [Source:RefSeq mRNA;Acc:NM_205159]	0.01	0.476549	0.492521	1.19076	2.03761	1.83405	1.68747	0.323023	up	2.38515	5.224	0.0156273	0.0625093	yes	GO:0006355(regulation of transcription, DNA-dependent),GO:0008285(negative regulation of cell proliferation),GO:0043066(negative regulation of apoptotic process),GO:0071320(cellular response to cAMP),GO:0071371(cellular response to gonadotropin stimulus),GO:0072112(glomerular visceral epithelial cell differentiation),GO:0072207(metanephric epithelium development),GO:0061032(visceral serous perica…	NA
ENSGALT00000042745	chr4	50355001	50359957	1	ENSGALG00000026098	IL8L2	Gallus gallus interleukin 8-like 2 (IL8L2), mRNA. [Source:RefSeq mRNA;Acc:NM_205498]	0.142748	2.23564	2.46699	7.4483	6.55613	11.2169	8.40712	1.61512	up	2.37997	5.20525	0.0242808	0.0576852	yes	GO:0042593(glucose homeostasis),GO:0050796(regulation of insulin secretion),GO:0055085(transmembrane transport),GO:0070588(calcium ion transmembrane transport),GO:0035725(sodium ion transmembrane transport),GO:0006851(mitochondrial calcium ion transport),GO:0016020(membrane),GO:0016021(integral to membrane),GO:0032592(integral to mitochondrial membrane),GO:0005886(plasma membrane),GO:0005739(mito…	NA
ENSGALT00000043235	chr18	7577909	7590495	-1	ENSGALG00000026628	CACNG5	calcium channel, voltage-dependent, gamma subunit 5	0.01	0.262773	0.230432	0.875462	1.10152	0.58227	0.853086	0.164402	up	2.37546	5.18903	0.0259449	0.0584506	yes	()	NA
ENSGALT00000000887	chr27	2938401	2963524	-1	ENSGALG00000000625	MAPT	Microtubule-associated protein [Source:UniProtKB/TrEMBL;Acc:B0LVG0]	0.01	0.208732	0.980581	1.94717	2.30997	1.89877	2.05197	0.396438	up	2.37184	5.17602	0.0183422	0.0594226	yes	GO:0006355(regulation of transcription, DNA-dependent),GO:0045944(positive regulation of transcription from RNA polymerase II promoter),GO:0048839(inner ear development),GO:0000122(negative regulation of transcription from RNA polymerase II promoter),GO:0002088(lens development in camera-type eye),GO:0001816(cytokine production),GO:0010628(positive regulation of gene expression),GO:0032330(regula…	05202(Transcriptional misregulation in cancers),05321(Inflammatiory bowel disease (IBD))
ENSGALT00000038919	chr17	8212310	8238531	-1	ENSGALG00000001645	KCNT1	Potassium channel subfamily T member 1 [Source:UniProtKB/Swiss-Prot;Acc:Q8QFV0]	0.01	0.137597	0.0775687	0.412581	0.311471	0.385134	0.369729	0.0717221	up	2.36598	5.15502	0.00495485	0.0571265	yes	GO:0000122(negative regulation of transcription from RNA polymerase II promoter),GO:0000380(alternative mRNA splicing, via spliceosome),GO:0005654(nucleoplasm),GO:0016363(nuclear matrix),GO:0042382(paraspeckles),GO:0000166(nucleotide binding),GO:0003676(nucleic acid binding),GO:0005515(protein binding)	NA
ENSGALT00000032299	chr28	972503	976394	1	ENSGALG00000013431	RX1	Gallus gallus retina and anterior neural fold homeobox 2 (RAX2), mRNA. [Source:RefSeq mRNA;Acc:NM_204104]	0.01	0.366679	0.275614	1.14019	0.983737	1.11186	1.0786	0.214098	up	2.33281	5.03787	0.00749396	0.0564929	yes	GO:0005975(carbohydrate metabolic process),GO:0005737(cytoplasm),GO:0004645(phosphorylase activity),GO:0008184(glycogen phosphorylase activity),GO:0016740(transferase activity),GO:0016757(transferase activity, transferring glycosyl groups),GO:0030170(pyridoxal phosphate binding)	00500(Starch and sucrose metabolism),04910(Insulin signaling pathway)
ENSGALT00000002100	chr26	3106955	3107746	-1	ENSGALG00000001378	C1ORF74	chromosome 1 open reading frame 74 [Source:HGNC Symbol;Acc:26319]	0.01	0.178555	1.14079	1.90361	3.05384	1.62427	2.19391	0.439783	up	2.31864	4.98862	0.0377693	0.0514082	yes	GO:0006508(proteolysis),GO:0031012(extracellular matrix),GO:0004222(metalloendopeptidase activity),GO:0008237(metallopeptidase activity),GO:0008270(zinc ion binding),GO:0005515(protein binding)	NA
ENSGALT00000020947	chr2	67611323	67673626	-1	ENSGALG00000012845	MYLK4	myosin light chain kinase family, member 4 [Source:HGNC Symbol;Acc:27972]	0.01	0.0814138	0.397765	0.867969	0.819073	0.683629	0.790224	0.159726	up	2.30666	4.94736	0.0209915	0.0579485	yes	GO:0006221(pyrimidine nucleotide biosynthetic process),GO:0006541(glutamine metabolic process),GO:0044210('de novo' CTP biosynthetic process),GO:0006241(CTP biosynthetic process),GO:0000166(nucleotide binding),GO:0003883(CTP synthase activity),GO:0005524(ATP binding),GO:0016874(ligase activity),GO:0016787(hydrolase activity)	00240(Pyrimidine metabolism)
ENSGALT00000038788	chr4	22840933	22842060	1	ENSGALG00000009499	NPY5R	neuropeptide Y receptor Y5 [Source:HGNC Symbol;Acc:7958]	0.01	0.695773	0.457605	1.15903	2.09997	2.43433	1.89777	0.384459	up	2.30341	4.93622	0.0384475	0.0509169	yes	()	NA
ENSGALT00000010530	chr24	3099783	3116043	-1	ENSGALG00000006518	C11ORF63	chromosome 11 open reading frame 63 [Source:HGNC Symbol;Acc:26288]	0.01	0.491938	0.221859	0.852256	1.51775	1.12449	1.16483	0.237932	up	2.2915	4.89565	0.0211741	0.0580437	yes	GO:0006729(tetrahydrobiopterin biosynthetic process),GO:0045893(positive regulation of transcription, DNA-dependent),GO:0051289(protein homotetramerization),GO:0051291(protein heterooligomerization),GO:0005634(nucleus),GO:0005739(mitochondrion),GO:0004505(phenylalanine 4-monooxygenase activity),GO:0008124(4-alpha-hydroxytetrahydrobiopterin dehydratase activity),GO:0005515(protein binding)	NA
ENSGALT00000041273	chr28	926855	927556	-1	ENSGALG00000024395	novel gene	Uncharacterized protein [Source:UniProtKB/TrEMBL;Acc:F1NTT8]	0.01	0.476148	1.07369	1.58635	2.63468	3.33183	2.51762	0.516611	up	2.28491	4.87333	0.0375326	0.0523586	yes	GO:0006810(transport),GO:0006811(ion transport),GO:0015991(ATP hydrolysis coupled proton transport),GO:0015992(proton transport),GO:0046034(ATP metabolic process),GO:0033178(proton-transporting two-sector ATPase complex, catalytic domain),GO:0033180(proton-transporting V-type ATPase, V1 domain),GO:0005524(ATP binding),GO:0016820(hydrolase activity, acting on acid anhydrides, catalyzing transmembr…	00190(Oxidative phosphorylation),04145(Phagosome),04966(Collecting duct acid secretion),04721(Synaptic vesicle cycle),05323(Rheumatoid arthritis),05110(Vibrio cholerae infection),05120(Epithelial cell signaling in Helicobacter pylori infection)
ENSGALT00000014255	chr8	15399750	15414613	1	ENSGALG00000008763	SSX2IP	Gallus gallus synovial sarcoma, X breakpoint 2 interacting protein (SSX2IP), mRNA. [Source:RefSeq mRNA;Acc:NM_001044656]	0.01	0.1427	0.193069	0.513457	0.516834	0.579153	0.536481	0.111923	up	2.26102	4.79331	0.0105385	0.0536505	yes	GO:0006810(transport),GO:0015031(protein transport),GO:0045324(late endosome to vacuole transport),GO:0000815(ESCRT III complex),GO:0005634(nucleus),GO:0005737(cytoplasm),GO:0008565(protein transporter activity)	04144(Endocytosis)
ENSGALT00000040258	chr14	7016036	7025853	-1	ENSGALG00000023919	HS3ST2	heparan sulfate (glucosamine) 3-O-sulfotransferase 2 [Source:HGNC Symbol;Acc:5195]	0.01	0.708091	0.228101	1.14585	2.13715	1.20332	1.49544	0.312064	up	2.26065	4.79209	0.0449344	0.0509083	yes	()	NA
ENSGALT00000037194	chr1	75769353	75804565	-1	ENSGALG00000022962	OVST	Gallus gallus ovostatin (OVST), mRNA. [Source:RefSeq mRNA;Acc:NM_205226]	0.01	0.0300821	0.10175	0.1804	0.151322	0.294698	0.208807	0.0439441	up	2.24843	4.75164	0.0424542	0.0505838	yes	GO:0005737(cytoplasm),GO:0003779(actin binding),GO:0005509(calcium ion binding),GO:0046872(metal ion binding),GO:0005515(protein binding)	NA
ENSGALT00000044947	chr1	167380456	167398695	1	ENSGALG00000027689	LRRC63	leucine rich repeat containing 63 [Source:HGNC Symbol;Acc:34296]	0.01	0.879199	0.482928	1.62231	2.65358	1.98762	2.08784	0.454042	up	2.20111	4.59833	0.0152512	0.0622756	yes	GO:0005515(protein binding)	NA
ENSGALT00000002898	chr14	14447489	14451837	-1	ENSGALG00000001866	MCHR2	melanin-concentrating hormone receptor 2(MCHR2)	0.01	0.445404	0.27899	1.03874	0.970891	1.29863	1.10275	0.241465	up	2.19123	4.56694	0.00747993	0.0574928	yes	GO:0005515(protein binding),GO:0051592(response to calcium ion),GO:0030120(vesicle coat),GO:0030134(ER to Golgi transport vesicle),GO:0043231(intracellular membrane-bounded organelle),GO:0005783(endoplasmic reticulum),GO:0048471(perinuclear region of cytoplasm),GO:0005737(cytoplasm),GO:0048306(calcium-dependent protein binding)	04141(Protein processing in endoplasmic reticulum)
ENSGALT00000009379	chrZ	7784790	7796943	-1	ENSGALG00000005839	LOC100858693	AT rich interactive domain 3C (BRIGHT-like) [Source:HGNC Symbol;Acc:21209]	0.01	0.0847817	0.223041	0.508429	0.511773	0.355954	0.458719	0.102608	up	2.16047	4.47061	0.0141684	0.0597206	yes	GO:0016998(cell wall macromolecule catabolic process)	NA
ENSGALT00000022430	chr3	53273170	53301050	1	ENSGALG00000013822	TXLNB	Gallus gallus taxilin beta (TXLNB), mRNA. [Source:RefSeq mRNA;Acc:NM_204754]	0.01	0.138304	0.623736	1.19802	1.18271	1.01617	1.1323	0.254013	up	2.15628	4.45764	0.0340967	0.0536784	yes	()	NA
ENSGALT00000000059	chr14	13557654	13560150	1	ENSGALG00000000044	WFIKKN1	WAP, follistatin/kazal, immunoglobulin, kunitz and netrin domain containing 1 [Source:HGNC Symbol;Acc:30912]	0.01	0.081696	0.0921101	0.272181	0.328765	0.1715	0.257482	0.0579354	up	2.15195	4.44429	0.0286783	0.0562094	yes	GO:0061179(negative regulation of insulin secretion involved in cellular response to glucose stimulus),GO:0005739(mitochondrion)	NA
ENSGALT00000045589	chr3	64050590	64195525	1	ENSGALG00000026594	HS3ST5	heparan sulfate (glucosamine) 3-O-sulfotransferase 5 [Source:HGNC Symbol;Acc:19419]	0.01	0.132878	0.424481	0.575511	1.00263	0.883322	0.820487	0.185786	up	2.14284	4.41629	0.0237351	0.0570807	yes	GO:0000122(negative regulation of transcription from RNA polymerase II promoter),GO:0032204(regulation of telomere maintenance),GO:0005634(nucleus),GO:0005515(protein binding),GO:0001078(RNA polymerase II core promoter proximal region sequence-specific DNA binding transcription factor activity involved in negative regulation of transcription)	NA
ENSGALT00000010991	chr4	5150002	5155096	-1	ENSGALG00000006796	SRPX2	sushi-repeat containing protein, X-linked 2 [Source:HGNC Symbol;Acc:30668]	0.01	0.661165	0.193264	0.881102	1.33034	1.54216	1.2512	0.284809	up	2.13525	4.39312	0.025037	0.0584197	yes	GO:0006534(cysteine metabolic process),GO:0006536(glutamate metabolic process),GO:0006749(glutathione metabolic process),GO:0006979(response to oxidative stress),GO:0035229(positive regulation of glutamate-cysteine ligase activity),GO:0042493(response to drug),GO:0043066(negative regulation of apoptotic process),GO:0050880(regulation of blood vessel size),GO:0051900(regulation of mitochondrial de…	00480(Glutathione metabolism)
ENSGALT00000042626	chr20	9598823	9610812	-1	ENSGALG00000027965	OPRL1	opiate receptor-like 1 [Source:HGNC Symbol;Acc:8155]	0.01	0.267038	0.616494	1.06761	1.84222	0.96099	1.29027	0.294511	up	2.13128	4.38107	0.0482441	0.0501637	yes	GO:0006355(regulation of transcription, DNA-dependent),GO:0005634(nucleus),GO:0003677(DNA binding),GO:0003700(sequence-specific DNA binding transcription factor activity)	NA
ENSGALT00000045785	chr8	20873411	20875481	1	ENSGALG00000028153	FOXE3	forkhead box E3 [Source:HGNC Symbol;Acc:3808]	0.01	0.183181	0.240954	0.549262	0.829311	0.448632	0.609068	0.141378	up	2.10704	4.30807	0.0334195	0.054134	yes	GO:0006468(protein phosphorylation),GO:0006915(apoptotic process),GO:0007169(transmembrane receptor protein tyrosine kinase signaling pathway),GO:0007275(multicellular organismal development),GO:0007399(nervous system development),GO:0007420(brain development),GO:0016310(phosphorylation),GO:0018108(peptidyl-tyrosine phosphorylation),GO:0022407(regulation of cell-cell adhesion),GO:0031290(retinal …	04360(Axon guidance)
ENSGALT00000043751	chr3	94575875	94584183	-1	ENSGALG00000028982	CMPK2	cytidine monophosphate (UMP-CMP) kinase 2, mitochondrial [Source:HGNC Symbol;Acc:27015]	3.4452	1.48757	2.55225	8.59761	11.4196	11.7669	10.5947	2.49501	up	2.08623	4.24636	0.00500401	0.0560449	yes	GO:0006099(tricarboxylic acid cycle),GO:0008152(metabolic process),GO:0055114(oxidation-reduction process),GO:0021860(pyramidal neuron development),GO:0021766(hippocampus development),GO:0021695(cerebellar cortex development),GO:0021794(thalamus development),GO:0022028(tangential migration from the subventricular zone to the olfactory bulb),GO:0021756(striatum development),GO:0061034(olfactory bu…	01200(Carbon metabolism),00020(Citrate cycle (TCA cycle)),00310(Lysine degradation),00380(Tryptophan metabolism)
ENSGALT00000021555	chr2	87131471	87135061	1	ENSGALG00000013194	IRX1	iroquois-class homeodomain protein IRX-1 [Source:RefSeq peptide;Acc:NP_001025509]	0.01	0.611468	0.710305	1.7779	2.40477	1.36141	1.84803	0.440591	up	2.06848	4.19443	0.0234155	0.0570116	yes	GO:0005765(lysosomal membrane),GO:0031410(cytoplasmic vesicle),GO:0005730(nucleolus),GO:0005737(cytoplasm),GO:0005886(plasma membrane),GO:0005515(protein binding)	NA
ENSGALT00000014008	chr2	19249639	19287303	-1	ENSGALG00000008602	SLC39A12	solute carrier family 39 (zinc transporter), member 12 [Source:HGNC Symbol;Acc:20860]	0.01	0.172278	0.305233	0.409976	0.817091	0.774972	0.667346	0.15917	up	2.06786	4.19266	0.0376818	0.0521953	yes	()	NA
ENSGALT00000008807	chr8	11462566	11465810	-1	ENSGALG00000005482	novel gene	Uncharacterized protein [Source:UniProtKB/TrEMBL;Acc:F1P5T9]	0.01	0.250441	0.376488	1.05688	0.92385	0.642567	0.874431	0.208976	up	2.06501	4.18436	0.0159315	0.0618332	yes	GO:0006351(transcription, DNA-templated),GO:0006355(regulation of transcription, DNA-dependent),GO:0007165(signal transduction),GO:0045892(negative regulation of transcription, DNA-dependent),GO:0045944(positive regulation of transcription from RNA polymerase II promoter),GO:0000122(negative regulation of transcription from RNA polymerase II promoter),GO:0005634(nucleus),GO:0005737(cytoplasm),GO:…	NA
ENSGALT00000027385	chr1	164871751	164897395	-1	ENSGALG00000016943	OLFM4	Gallus gallus olfactomedin 4 (OLFM4), mRNA. [Source:RefSeq mRNA;Acc:NM_001040463]	0.01	0.485965	0.383539	1.42477	0.733366	1.39422	1.18412	0.289835	up	2.03051	4.08549	0.0367584	0.0527813	yes	()	NA
ENSGALT00000043491	chr8	24177461	24179735	1	ENSGALG00000027806	BSND	Bartter syndrome, infantile, with sensorineural deafness (Barttin) [Source:HGNC Symbol;Acc:16512]	0.01	0.0837275	0.566403	0.836847	1.01082	0.761645	0.869771	0.21671	up	2.00487	4.01352	0.0498796	0.0498796	yes	GO:0005515(protein binding)	NA
ENSGALT00000025999	chr1	108280289	108296301	1	ENSGALG00000016142	MX1	Gallus gallus myxovirus (influenza virus) resistance 1, interferon-inducible protein p78 (mouse) (MX1), mRNA. [Source:RefSeq mRNA;Acc:NM_204609]	1.51823	2.08315	0.58158	4.32279	6.22743	5.95564	5.50196	1.39432	up	1.98038	3.94598	0.00654543	0.0570179	yes	GO:0006468(protein phosphorylation),GO:0007165(signal transduction),GO:0007172(signal complex assembly),GO:0016310(phosphorylation),GO:0018108(peptidyl-tyrosine phosphorylation),GO:2000811(negative regulation of anoikis),GO:0033628(regulation of cell adhesion mediated by integrin),GO:0060396(growth hormone receptor signaling pathway),GO:0022408(negative regulation of cell-cell adhesion),GO:004566…	04012(ErbB signaling pathway),04370(VEGF signaling pathway),04151(PI3K-Akt signaling pathway),04810(Regulation of actin cytoskeleton),04510(Focal adhesion),04670(Leucyte transendothelial migration),04062(Chemokine signaling pathway),04360(Axon guidance),05200(Pathways in cancer),05202(Transcriptional misregulation in cancers),05205(Proteoglycans in cancer),05222(Small cell lung cancer),05100(Bact…
ENSGALT00000025181	chr2	116629419	116718405	-1	ENSGALG00000015622	EYA1	Eyes absent homolog 1 [Source:UniProtKB/Swiss-Prot;Acc:Q9YHA0]	0.01	0.187058	0.339788	0.706301	0.721401	0.632651	0.686785	0.175615	up	1.96744	3.91073	0.0277767	0.0573078	yes	GO:0050766(positive regulation of phagocytosis),GO:0007605(sensory perception of sound),GO:0007602(phototransduction),GO:0060041(retina development in camera-type eye),GO:0009584(detection of visible light),GO:0044259(multicellular organismal macromolecule metabolic process),GO:0043231(intracellular membrane-bounded organelle),GO:0005829(cytosol),GO:0005515(protein binding),GO:0008020(G-protein c…	NA
ENSGALT00000023656	chr1	76902135	76904840	-1	ENSGALG00000014680	LOC418298	solute carrier family 25 member 33-like(LOC418298)	0.01	0.642215	2.17224	3.33781	5.03964	2.60645	3.6613	0.938152	up	1.96446	3.90267	0.048675	0.0498188	yes	GO:0005882(intermediate filament),GO:0005200(structural constituent of cytoskeleton)	NA
ENSGALT00000031363	chrZ	3411089	3422336	1	ENSGALG00000008893	SYT4	synaptotagmin IV [Source:HGNC Symbol;Acc:11512]	0.01	0.376954	0.185259	0.560311	0.962683	0.608706	0.710567	0.187404	up	1.92282	3.79162	0.0362834	0.05327	yes	GO:0005882(intermediate filament),GO:0005200(structural constituent of cytoskeleton)	NA
ENSGALT00000023981	chrZ	13504755	13512913	1	ENSGALG00000014861	NIM1	Gallus gallus serine/threonine-protein kinase NIM1 (NIM1), mRNA. [Source:RefSeq mRNA;Acc:NM_001252130]	0.01	0.583559	0.950368	2.13862	2.44623	1.15697	1.91394	0.511309	up	1.90428	3.74322	0.048108	0.0504234	yes	GO:0010466(negative regulation of peptidase activity),GO:0005576(extracellular region),GO:0004867(serine-type endopeptidase inhibitor activity),GO:0030414(peptidase inhibitor activity),GO:0005515(protein binding)	NA
ENSGALT00000036597	chr2	131690687	131704507	1	ENSGALG00000016101	TRHR	Gallus gallus thyrotropin-releasing hormone receptor (TRHR), mRNA. [Source:RefSeq mRNA;Acc:NM_204930]	0.01	0.477353	0.583053	1.66988	1.20062	1.08559	1.31869	0.353469	up	1.89946	3.73072	0.0189022	0.0597553	yes	GO:0007005(mitochondrion organization),GO:0005739(mitochondrion),GO:0031305(integral to mitochondrial inner membrane),GO:0005515(protein binding)	NA
ENSGALT00000001206	chr26	159809	170262	1	ENSGALG00000000826	MAPK13	mitogen-activated protein kinase 13 [Source:HGNC Symbol;Acc:6875]	0.579769	0.515176	0.968078	3.43275	1.81404	2.43333	2.56004	0.687675	up	1.89637	3.72275	0.0481319	0.0503138	yes	GO:0010951(negative regulation of endopeptidase activity),GO:0005576(extracellular region),GO:0005615(extracellular space),GO:0004866(endopeptidase inhibitor activity)	NA
ENSGALT00000014253	chr1	21866991	21875891	-1	ENSGALG00000008761	SPAM1	sperm adhesion molecule 1 (PH-20 hyaluronidase, zona pellucida binding) [Source:HGNC Symbol;Acc:11217]	0.01	0.364709	0.582532	1.39733	1.10076	1.02082	1.17297	0.315747	up	1.89332	3.7149	0.0182271	0.0595419	yes	GO:0006351(transcription, DNA-templated),GO:0006355(regulation of transcription, DNA-dependent),GO:0007389(pattern specification process),GO:0009790(embryo development),GO:0009888(tissue development),GO:0045893(positive regulation of transcription, DNA-dependent),GO:0005634(nucleus),GO:0005730(nucleolus),GO:0003677(DNA binding),GO:0003700(sequence-specific DNA binding transcription factor activit…	NA
ENSGALT00000017420	chr5	43496232	43497305	-1	ENSGALG00000010707	GPR68	G protein-coupled receptor 68 [Source:HGNC Symbol;Acc:4519]	0.01	0.65836	0.989711	2.19341	1.72211	2.11915	2.01156	0.549357	up	1.8725	3.66166	0.0213301	0.0576648	yes	GO:0006260(DNA replication),GO:0006473(protein acetylation),GO:0008285(negative regulation of cell proliferation),GO:0043065(positive regulation of apoptotic process),GO:0043966(histone H3 acetylation),GO:0045893(positive regulation of transcription, DNA-dependent),GO:0045926(negative regulation of growth),GO:2001235(positive regulation of apoptotic signaling pathway),GO:0005634(nucleus),GO:00707…	NA
ENSGALT00000041025	chr13	7758392	7761497	-1	ENSGALG00000024289	novel gene	Uncharacterized protein [Source:UniProtKB/TrEMBL;Acc:E1BRG9]	0.01	0.408716	0.307211	0.680845	1.02798	0.857994	0.855607	0.238642	up	1.8421	3.58531	0.0190469	0.0592572	yes	GO:0007155(cell adhesion),GO:0015629(actin cytoskeleton),GO:0005198(structural molecule activity),GO:0045296(cadherin binding)	NA
ENSGALT00000043616	chr9	5411909	5436836	-1	ENSGALG00000027820	RBP1	retinol-binding protein 1 [Source:RefSeq peptide;Acc:NP_001264345]	0.01	0.139234	0.261639	0.402027	0.466928	0.552097	0.473684	0.133624	up	1.82574	3.54489	0.0267227	0.0572421	yes	GO:0010907(positive regulation of glucose metabolic process),GO:0032000(positive regulation of fatty acid beta-oxidation),GO:0014065(phosphatidylinositol 3-kinase signaling),GO:0046326(positive regulation of glucose import),GO:0048009(insulin-like growth factor receptor signaling pathway),GO:0045725(positive regulation of glycogen biosynthetic process),GO:0046676(negative regulation of insulin se…	04151(PI3K-Akt signaling pathway),04150(mTOR signaling pathway),04910(Insulin signaling pathway),04920(Adipocytokine signaling pathway),04960(Aldosterone-regulated sodium reabsorption),04722(Neurotrophin signaling pathway),05206(MicroRNAs in cancer),04930(Type II diabetes mellitus),04932(Non-alcoholic fatty liver disease (NAFLD))
ENSGALT00000025920	chr4	89193871	89196259	1	ENSGALG00000016086	EGR4	early growth response 4 [Source:HGNC Symbol;Acc:3241]	0.01	0.801223	0.828077	1.77958	2.35106	1.58852	1.90639	0.5431	up	1.81155	3.5102	0.0195073	0.0588221	yes	GO:0016525(negative regulation of angiogenesis),GO:0030334(regulation of cell migration),GO:0035329(hippo signaling),GO:0043116(negative regulation of vascular permeability),GO:0043536(positive regulation of blood vessel endothelial cell migration),GO:0001570(vasculogenesis),GO:0001701(in utero embryonic development),GO:0006935(chemotaxis),GO:0034613(cellular protein localization),GO:0030036(acti…	04390(Hippo signaling pathway)
ENSGALT00000029259	chrZ	6016209	6212212	1	ENSGALG00000018499	novel gene	Uncharacterized protein [Source:UniProtKB/TrEMBL;Acc:E1C131]	0.01	0.336905	0.712221	1.06632	1.56763	1.0314	1.22178	0.349709	up	1.80476	3.49371	0.0329191	0.0546792	yes	GO:0006508(proteolysis),GO:0010716(negative regulation of extracellular matrix disassembly),GO:0033632(regulation of cell-cell adhesion mediated by integrin),GO:0043542(endothelial cell migration),GO:0031295(T cell costimulation),GO:0042110(T cell activation),GO:0001666(response to hypoxia),GO:0008284(positive regulation of cell proliferation),GO:0016020(membrane),GO:0071438(invadopodium membrane…	04974(Protein digestion and absorption)
ENSGALT00000032053	chr4	78096383	78102028	-1	ENSGALG00000014992	TMEM128	Gallus gallus transmembrane protein 128 (TMEM128), mRNA. [Source:RefSeq mRNA;Acc:NM_001031163]	1.37789	0.01	0.862784	3.56928	2.15565	2.0348	2.58657	0.746892	up	1.79207	3.46312	0.046561	0.0504196	yes	GO:0006351(transcription, DNA-templated),GO:0006355(regulation of transcription, DNA-dependent),GO:0006366(transcription from RNA polymerase II promoter),GO:0043010(camera-type eye development),GO:0001654(eye development),GO:0050679(positive regulation of epithelial cell proliferation),GO:0048468(cell development),GO:0005634(nucleus),GO:0005667(transcription factor complex),GO:0003677(DNA binding…	NA
ENSGALT00000000776	chr28	701484	724473	-1	ENSGALG00000000558	SLC1A6	solute carrier family 1 (high affinity aspartate/glutamate transporter), member 6 [Source:HGNC Symbol;Acc:10944]	0.01	1.15974	0.599306	1.93191	2.55231	1.57233	2.01885	0.586349	up	1.7837	3.44309	0.0324264	0.0547894	yes	GO:0006511(ubiquitin-dependent protein catabolic process),GO:0031461(cullin-RING ubiquitin ligase complex),GO:0008270(zinc ion binding),GO:0031625(ubiquitin protein ligase binding),GO:0046872(metal ion binding),GO:0005515(protein binding),GO:0005488(binding)	NA
ENSGALT00000021016	chr2	68039155	68055936	1	ENSGALG00000012886	MARVELD3	MARVEL domain containing 3 [Source:HGNC Symbol;Acc:30525]	0.01	0.491311	0.369294	1.30949	0.741434	0.859485	0.970137	0.286868	up	1.7578	3.38182	0.0410833	0.0503271	yes	GO:0006351(transcription, DNA-templated),GO:0006355(regulation of transcription, DNA-dependent),GO:0009408(response to heat),GO:0005634(nucleus),GO:0003677(DNA binding),GO:0003700(sequence-specific DNA binding transcription factor activity),GO:0043565(sequence-specific DNA binding)	NA
ENSGALT00000004173	chr9	9975584	10013804	1	ENSGALG00000002647	PLS1	Gallus gallus plastin 1 (PLS1), mRNA. [Source:RefSeq mRNA;Acc:NM_205347]	0.01	0.256281	0.712743	0.990445	0.876636	1.39879	1.08862	0.323008	up	1.75286	3.37027	0.0468819	0.0503498	yes	GO:0031175(neuron projection development),GO:0005886(plasma membrane),GO:0051219(phosphoprotein binding)	NA
ENSGALT00000023517	chr19	4792410	4793550	1	ENSGALG00000014585	CCLI10	Chemokine; Uncharacterized protein [Source:UniProtKB/TrEMBL;Acc:E1C733]	123.635	178.815	70.1313	353.943	407.418	493.141	418.167	124.194	up	1.75149	3.36706	0.00550617	0.0568005	yes	GO:0006184(GTP catabolic process),GO:0006614(SRP-dependent cotranslational protein targeting to membrane),GO:0006810(transport),GO:0006886(intracellular protein transport),GO:0005785(signal recognition particle receptor complex),GO:0016020(membrane),GO:0000166(nucleotide binding),GO:0003924(GTPase activity),GO:0005047(signal recognition particle binding),GO:0005525(GTP binding),GO:0017111(nucleos…	03060(Protein export)
ENSGALT00000025619	chr3	79802794	79856460	1	ENSGALG00000015897	IMPG1	Gallus gallus interphotoreceptor matrix proteoglycan 1 (IMPG1), mRNA. [Source:RefSeq mRNA;Acc:NM_204241]	0.01	0.172493	0.334941	0.59384	0.694155	0.402339	0.563445	0.169145	up	1.73602	3.33114	0.0386481	0.0506691	yes	GO:0007525(somatic muscle development),GO:0005212(structural constituent of eye lens)	05205(Proteoglycans in cancer),05169(Epstein-Barr virus infection)
ENSGALT00000018853	chr3	43561606	43765176	-1	ENSGALG00000011560	PACRG	PARK2 co-regulated [Source:HGNC Symbol;Acc:19152]	0.423262	0.0940265	0.530062	0.845805	1.32435	1.283	1.15105	0.349117	up	1.72117	3.29704	0.0171972	0.0601901	yes	GO:0007155(cell adhesion),GO:0042060(wound healing),GO:0030308(negative regulation of cell growth),GO:0009986(cell surface),GO:0005887(integral to plasma membrane),GO:0005515(protein binding)	NA
ENSGALT00000015100	chr4	20013683	20014840	1	ENSGALG00000009280	NPY2R	Gallus gallus neuropeptide Y receptor Y2 (NPY2R), mRNA. [Source:RefSeq mRNA;Acc:NM_001031128]	0.01	1.34333	1.33098	2.44116	3.19438	3.16178	2.93244	0.891437	up	1.7179	3.28957	0.0259602	0.0581509	yes	GO:0006281(DNA repair),GO:0006284(base-excision repair),GO:0006285(base-excision repair, AP site formation),GO:0006296(nucleotide-excision repair, DNA incision, 5'-to lesion),GO:0005634(nucleus),GO:0005739(mitochondrion),GO:0003677(DNA binding),GO:0003690(double-stranded DNA binding),GO:0003824(catalytic activity),GO:0003906(DNA-(apurinic or apyrimidinic site) lyase activity),GO:0004519(endonucle…	03410(Base excision repair)
ENSGALT00000009730	chr10	10797189	10815208	-1	ENSGALG00000006041	BNC1	basonuclin 1 [Source:HGNC Symbol;Acc:1081]	0.01	0.510066	0.79873	1.27451	1.88158	1.13024	1.42878	0.436265	up	1.7115	3.27502	0.0389098	0.0506733	yes	GO:0030036(actin cytoskeleton organization),GO:0005515(protein binding),GO:0003779(actin binding)	NA
ENSGALT00000033237	chr6	21891716	21893038	1	ENSGALG00000020746	EXOSC1	exosome component 1 [Source:HGNC Symbol;Acc:17286]	0.01	5.41922	11.3472	19.4304	13.5003	21.8496	18.2601	5.5888	up	1.70809	3.26727	0.0404788	0.0510215	yes	()	NA
ENSGALT00000044689	chr4	11297723	11302652	-1	ENSGALG00000025991	GLOD5	glyoxalase domain containing 5 [Source:HGNC Symbol;Acc:33358]	1.56385	0.325693	0.979226	4.03652	2.68687	2.46135	3.06158	0.956258	up	1.6788	3.20163	0.0297778	0.056941	yes	GO:0000302(response to reactive oxygen species),GO:0005975(carbohydrate metabolic process),GO:0006954(inflammatory response),GO:0008152(metabolic process),GO:0009615(response to virus),GO:0010634(positive regulation of epithelial cell migration),GO:0030212(hyaluronan metabolic process),GO:0030213(hyaluronan biosynthetic process),GO:0030214(hyaluronan catabolic process),GO:0030307(positive regulat…	00531(Glycosaminoglycan degradation)
ENSGALT00000018380	chr2	36079003	36190451	1	ENSGALG00000011262	KCNH8	potassium voltage-gated channel, subfamily H (eag-related), member 8 [Source:HGNC Symbol;Acc:18864]	0.01	0.483155	0.237453	0.99058	0.71043	0.598153	0.766388	0.240203	up	1.67382	3.19059	0.0460802	0.0505979	yes	GO:0006816(calcium ion transport),GO:0016020(membrane),GO:0016021(integral to membrane)	04010(MAPK signaling pathway),04260(Cardiac muscle contraction),05410(Hypertrophic cardiomyopathy (HCM)),05412(Arrhythmogenic right ventricular cardiomyopathy (ARVC)),05414(Dilated cardiomyopathy (DCM))
ENSGALT00000005715	chr6	8962083	9024949	1	ENSGALG00000003612	RNLS	Gallus gallus renalase, FAD-dependent amine oxidase (RNLS), mRNA. [Source:RefSeq mRNA;Acc:NM_001199599]	0.01	2.41736	3.58354	5.45866	7.83649	5.82643	6.37386	2.0003	up	1.67195	3.18645	0.0325245	0.0547193	yes	GO:0005488(binding)	NA
ENSGALT00000018667	chr2	40463088	40532241	-1	ENSGALG00000011447	GADL1	glutamate decarboxylase-like 1 [Source:HGNC Symbol;Acc:27949]	0.01	1.12441	1.10521	2.82399	2.5235	1.69465	2.34738	0.743205	up	1.65922	3.15845	0.033498	0.0540379	yes	GO:0008033(tRNA processing),GO:0009058(biosynthetic process),GO:0005739(mitochondrion),GO:0000166(nucleotide binding),GO:0005524(ATP binding),GO:0016740(transferase activity),GO:0004161(dimethylallyltranstransferase activity)	00908(Zeatin biosynthesis)
ENSGALT00000009815	chr10	10954013	10971823	-1	ENSGALG00000006083	LMI	lamin-L(III)-like(LMINA)	0.646675	0.20112	0.36713	1.05294	1.35856	1.40733	1.27294	0.404975	up	1.65226	3.14327	0.00756052	0.0548838	yes	GO:0001954(positive regulation of cell-matrix adhesion),GO:0002244(hematopoietic progenitor cell differentiation),GO:0003323(type B pancreatic cell development),GO:0006468(protein phosphorylation),GO:0007219(Notch signaling pathway),GO:0009615(response to virus),GO:0010468(regulation of gene expression),GO:0010628(positive regulation of gene expression),GO:0016310(phosphorylation),GO:0030097(hemo…	04151(PI3K-Akt signaling pathway),04110(Cell cycle),04115(p53 signaling pathway),05200(Pathways in cancer),05206(MicroRNAs in cancer),05203(Viral carcinogenesis),05212(Pancreatic cancer),05214(Glioma),05220(Chronic myeloid leukemia),05218(Melanoma),05222(Small cell lung cancer),05223(Non-small cell lung cancer),05162(Measles),05161(Hepatitis B)
ENSGALT00000042815	chr19	6073434	6077568	1	ENSGALG00000026000	ANKRD13B	ankyrin repeat domain 13B [Source:HGNC Symbol;Acc:26363]	0.01	0.998049	0.923301	2.55779	1.93096	1.50421	1.99765	0.64045	up	1.64115	3.11914	0.0377449	0.051554	yes	GO:0006810(transport),GO:0055085(transmembrane transport),GO:0016020(membrane),GO:0016021(integral to membrane)	NA
ENSGALT00000001528	chr19	565352	590836	-1	ENSGALG00000001031	HSF5	heat shock transcription factor family member 5 [Source:HGNC Symbol;Acc:26862]	0.01	0.528904	0.571479	1.14537	1.26376	0.971511	1.12688	0.366794	up	1.61929	3.07224	0.0367975	0.0524531	yes	GO:0007601(visual perception),GO:0042384(cilium assembly),GO:0042462(eye photoreceptor cell development),GO:0042073(intraciliary transport),GO:0005813(centrosome),GO:0001750(photoreceptor outer segment),GO:0005737(cytoplasm),GO:0005929(cilium),GO:0005794(Golgi apparatus),GO:0036064(ciliary basal body),GO:0036126(sperm flagellum),GO:0005515(protein binding)	NA
ENSGALT00000035184	chr19	565352	590836	-1	ENSGALG00000001031	HSF5	heat shock transcription factor family member 5 [Source:HGNC Symbol;Acc:26862]	0.01	0.536428	0.579608	1.16167	1.28174	0.98533	1.14291	0.372012	up	1.61929	3.07224	0.0367975	0.0526445	yes	()	NA
ENSGALT00000044742	chr3	54193387	54198421	-1	ENSGALG00000028522	SLC35D3	solute carrier family 35, member D3 [Source:HGNC Symbol;Acc:15621]	0.860936	0.472511	0.646903	1.61921	2.64852	1.70043	1.98938	0.660117	up	1.59153	3.01368	0.0447992	0.0510502	yes	GO:0006355(regulation of transcription, DNA-dependent),GO:0045892(negative regulation of transcription, DNA-dependent),GO:0071310(cellular response to organic substance),GO:0005634(nucleus),GO:0003677(DNA binding),GO:0003700(sequence-specific DNA binding transcription factor activity),GO:0043565(sequence-specific DNA binding)	NA
ENSGALT00000043742	chr24	6230556	6234006	-1	ENSGALG00000028966	HSPB2	Gallus gallus heat shock 27kDa protein 2 (HSPB2), mRNA. [Source:RefSeq mRNA;Acc:NM_001001527]	0.689506	0.574394	0.755549	2.21985	2.08035	1.76849	2.0229	0.67315	up	1.58743	3.00513	0.0043727	0.0552935	yes	GO:0006355(regulation of transcription, DNA-dependent),GO:0045944(positive regulation of transcription from RNA polymerase II promoter),GO:0001569(patterning of blood vessels),GO:0007507(heart development),GO:0045333(cellular respiration),GO:0051145(smooth muscle cell differentiation),GO:0071285(cellular response to lithium ion),GO:0055001(muscle cell development),GO:0005634(nucleus),GO:0005730(n…	04010(MAPK signaling pathway),04310(Wnt signaling pathway),04660(T cell receptor signaling pathway),04662(B cell receptor signaling pathway),04360(Axon guidance),05166(HTLV-I infection),05161(Hepatitis B)
ENSGALT00000007405	chr19	6662820	6673391	1	ENSGALG00000004649	TRPV1	Gallus gallus transient receptor potential cation channel, subfamily V, member 1 (TRPV1), mRNA. [Source:RefSeq mRNA;Acc:NM_204572]	0.01	0.476504	0.457654	0.846684	0.905518	1.03735	0.929849	0.311386	up	1.57829	2.98616	0.0450321	0.050872	yes	GO:0005576(extracellular region),GO:0005515(protein binding),GO:0030414(peptidase inhibitor activity)	NA
ENSGALT00000045030	chr1	77900956	77908186	-1	ENSGALG00000027302	TMEM52B	transmembrane protein 52B [Source:HGNC Symbol;Acc:26438]	0.01	0.515113	0.348466	0.663584	0.829177	1.03329	0.842016	0.28786	up	1.54848	2.92509	0.0464394	0.0505673	yes	GO:0030001(metal ion transport),GO:0055085(transmembrane transport),GO:0016020(membrane),GO:0046873(metal ion transmembrane transporter activity)	NA
ENSGALT00000007319	chr15	6068672	6089862	1	ENSGALG00000004598	CUX2	cut-like homeobox 2 [Source:HGNC Symbol;Acc:19347]	0.01	0.325094	0.39097	0.498222	0.784954	0.773444	0.68554	0.238688	up	1.52211	2.87212	0.0464544	0.0504436	yes	GO:0006184(GTP catabolic process),GO:0003924(GTPase activity),GO:0005525(GTP binding)	NA
ENSGALT00000008424	chr2	1480605	1505475	-1	ENSGALG00000005242	GHRH-LR	growth-hormone releasing hormone-like peptide receptor	0.577315	0.341997	0.273128	0.797585	1.33327	1.22647	1.11911	0.39748	up	1.4934	2.81551	0.0285047	0.0570093	yes	GO:0007165(signal transduction),GO:0035556(intracellular signal transduction),GO:0005622(intracellular),GO:0016459(myosin complex),GO:0000166(nucleotide binding),GO:0003774(motor activity),GO:0005524(ATP binding),GO:0046872(metal ion binding),GO:0005515(protein binding)	NA
ENSGALT00000022342	chr3	51523026	51525743	-1	ENSGALG00000013751	novel gene	Uncharacterized protein [Source:UniProtKB/TrEMBL;Acc:E1BSB1]	0	1.13587	1.06722	2.52286	1.90459	1.72211	2.04986	0.734363	up	1.48096	2.79134	0.048601	0.0500042	yes	GO:0006486(protein glycosylation),GO:0097503(sialylation),GO:0005794(Golgi apparatus),GO:0016020(membrane),GO:0016021(integral to membrane),GO:0030173(integral to Golgi membrane),GO:0008373(sialyltransferase activity),GO:0016740(transferase activity),GO:0016757(transferase activity, transferring glycosyl groups)	NA
ENSGALT00000045311	chr8	11180805	11212015	-1	ENSGALG00000025896	LPPR4	lipid phosphate phosphatase-related protein type 4	0.328025	0.388638	0.639012	1.26243	1.53954	0.968817	1.25693	0.451892	up	1.47585	2.78148	0.0212183	0.0577609	yes	GO:0006810(transport),GO:0055085(transmembrane transport),GO:0016020(membrane),GO:0016021(integral to membrane),GO:0005215(transporter activity),GO:0005515(protein binding),GO:0015347(sodium-independent organic anion transmembrane transporter activity),GO:0008514(organic anion transmembrane transporter activity)	NA
ENSGALT00000029738	chr4	80746268	80784359	1	ENSGALG00000015597	CPZ	Gallus gallus carboxypeptidase Z (CPZ), mRNA. [Source:RefSeq mRNA;Acc:NM_204578]	0.442926	0.0454129	0.529086	0.695975	0.959451	1.1281	0.927843	0.339141	up	1.45199	2.73586	0.0405919	0.0505144	yes	GO:0007155(cell adhesion),GO:0007156(homophilic cell adhesion),GO:0005886(plasma membrane),GO:0016020(membrane),GO:0016021(integral to membrane),GO:0005509(calcium ion binding)	NA
ENSGALT00000044161	chr8	27282785	27385916	1	ENSGALG00000027565	LOC101750009	cAMP-specific 3',5'-cyclic phosphodiesterase 4B-like	0.639143	1.10747	0.352182	2.10028	1.2856	2.26524	1.88371	0.6996	up	1.42897	2.69255	0.0386823	0.0505448	yes	GO:0016020(membrane),GO:0016021(integral to membrane)	NA
ENSGALT00000044176	chr1	177601063	177635306	-1	ENSGALG00000025748	FGF9	Gallus gallus fibroblast growth factor 9 (glia-activating factor) (FGF9), mRNA. [Source:RefSeq mRNA;Acc:NM_204399]	0.30913	0.559188	0.37607	0.862866	1.39164	0.967929	1.07414	0.414796	up	1.37271	2.58957	0.0380035	0.051548	yes	GO:0003151(outflow tract morphogenesis),GO:0003214(cardiac left ventricle morphogenesis),GO:0007165(signal transduction),GO:0007186(G-protein coupled receptor signaling pathway),GO:0005886(plasma membrane),GO:0016020(membrane),GO:0016021(integral to membrane),GO:0004871(signal transducer activity),GO:0004930(G-protein coupled receptor activity),GO:0004983(neuropeptide Y receptor activity),GO:0005…	04080(Neuroactive ligand-receptor interaction)
ENSGALT00000014060	chr2	19344174	19359528	-1	ENSGALG00000019667	novel gene	Uncharacterized protein [Source:UniProtKB/TrEMBL;Acc:E1BZ31]	3.49081	2.59339	3.2393	7.87782	8.05753	8.1929	8.04275	3.10783	up	1.37178	2.5879	0.00121509	0.0680451	yes	GO:0006200(ATP catabolic process),GO:0006810(transport),GO:0006813(potassium ion transport),GO:0055085(transmembrane transport),GO:0016020(membrane),GO:0016021(integral to membrane),GO:0008076(voltage-gated potassium channel complex),GO:0005886(plasma membrane),GO:0000166(nucleotide binding),GO:0005524(ATP binding),GO:0008281(sulfonylurea receptor activity),GO:0016887(ATPase activity),GO:0017111(…	02010(ABC transporters),04911(Insulin secretion),04930(Type II diabetes mellitus)
ENSGALT00000036264	chr12	7040368	7203572	1	ENSGALG00000005332	CACNA1D	calcium channel, voltage-dependent, L type, alpha 1D subunit [Source:HGNC Symbol;Acc:1391]	0.266034	0.155134	0.416451	0.605451	0.780372	0.620312	0.668712	0.279206	up	1.26005	2.39504	0.017071	0.0608347	yes	()	NA
ENSGALT00000004292	chr12	2479299	2483435	1	ENSGALG00000002722	MST1	Gallus gallus macrophage stimulating 1 (hepatocyte growth factor-like) (MST1), mRNA. [Source:RefSeq mRNA;Acc:NM_205213]	2.71697	5.79425	5.42136	11.9847	13.2982	8.02455	11.1025	4.64419	up	1.25738	2.39062	0.0343802	0.0532689	yes	()	NA
ENSGALT00000032623	chr5	26819715	26857654	1	ENSGALG00000020449	COX16	Gallus gallus COX16 cytochrome c oxidase assembly homolog (S. cerevisiae) (COX16), nuclear gene encoding mitochondrial protein, mRNA. [Source:RefSeq mRNA;Acc:NM_001197057]	4.97932	1.53158	5.18044	11.0557	7.96112	8.39513	9.13733	3.89711	up	1.22937	2.34464	0.0282939	0.0571713	yes	GO:0008156(negative regulation of DNA replication),GO:0031497(chromatin assembly),GO:0005634(nucleus),GO:0005737(cytoplasm),GO:0005515(protein binding)	NA
ENSGALT00000045764	chr2	81742502	81745670	-1	ENSGALG00000026637	novel gene	Uncharacterized protein [Source:UniProtKB/TrEMBL;Acc:R4GFB0]	1.0126	2.24946	2.31076	4.49661	5.12967	3.09563	4.24064	1.85761	up	1.19084	2.28285	0.0369163	0.0524319	yes	GO:0006955(immune response),GO:0006935(chemotaxis),GO:0005576(extracellular region),GO:0005615(extracellular space),GO:0005125(cytokine activity),GO:0008009(chemokine activity),GO:0008083(growth factor activity)	04064(NF-kappa B signaling pathway),04060(Cytokine-cytokine receptor interaction),04620(Toll-like receptor signaling pathway),04621(NOD-like receptor signaling pathway),04622(RIG-I-like receptor signaling pathway),04062(Chemokine signaling pathway),05200(Pathways in cancer),05202(Transcriptional misregulation in cancers),05219(Bladder cancer),05323(Rheumatoid arthritis),04932(Non-alcoholic fatty …
ENSGALT00000021109	chr2	74276764	74466274	1	ENSGALG00000012942	CDH18	cadherin 18, type 2 [Source:HGNC Symbol;Acc:1757]	0.507577	0.206721	0.515584	0.701238	1.15331	0.867914	0.907487	0.409961	up	1.14639	2.2136	0.0438599	0.0508671	yes	GO:0048870(cell motility),GO:0042325(regulation of phosphorylation),GO:0051965(positive regulation of synapse assembly),GO:0016337(cell-cell adhesion),GO:0090050(positive regulation of cell migration involved in sprouting angiogenesis),GO:0015630(microtubule cytoskeleton),GO:0005615(extracellular space),GO:0005737(cytoplasm),GO:0042802(identical protein binding),GO:0005102(receptor binding),GO:00…	NA
ENSGALT00000018060	chr3	39293107	39308903	1	ENSGALG00000011083	RAB4A	RAB4A, member RAS oncogene family [Source:HGNC Symbol;Acc:9781]	1.6045	1.4703	2.9638	3.91878	4.5721	4.77006	4.42031	2.01287	up	1.1349	2.19603	0.0201786	0.0585928	yes	GO:0001666(response to hypoxia),GO:0006810(transport),GO:0008286(insulin receptor signaling pathway),GO:0015758(glucose transport),GO:0055085(transmembrane transport),GO:0005887(integral to plasma membrane),GO:0016020(membrane),GO:0016021(integral to membrane),GO:0005765(lysosomal membrane),GO:0043231(intracellular membrane-bounded organelle),GO:0005215(transporter activity),GO:0005355(glucose tr…	NA
ENSGALT00000018100	chr7	20637422	20676092	1	ENSGALG00000011110	DPP4	Gallus gallus dipeptidyl-peptidase 4 (DPP4), mRNA. [Source:RefSeq mRNA;Acc:NM_001031255]	9.52416	3.50654	5.05452	10.322	13.352	15.9645	13.2129	6.02841	up	1.13209	2.19177	0.0423086	0.0508741	yes	GO:0007165(signal transduction),GO:0007186(G-protein coupled receptor signaling pathway),GO:0030819(positive regulation of cAMP biosynthetic process),GO:0005886(plasma membrane),GO:0016020(membrane),GO:0016021(integral to membrane),GO:0004871(signal transducer activity),GO:0004930(G-protein coupled receptor activity),GO:0004977(melanocortin receptor activity),GO:0004978(corticotropin receptor act…	04080(Neuroactive ligand-receptor interaction)
ENSGALT00000020256	chr5	58090554	58108522	-1	ENSGALG00000012404	ERO1L	ERO1-like protein alpha precursor [Source:RefSeq peptide;Acc:NP_001264498]	1.64793	1.74428	3.54479	4.73512	4.80959	5.60551	5.05007	2.31233	up	1.12696	2.18397	0.0312928	0.0567906	yes	GO:0006355(regulation of transcription, DNA-dependent),GO:0005634(nucleus),GO:0005737(cytoplasm),GO:0008270(zinc ion binding),GO:0016922(ligand-dependent nuclear receptor binding)	NA
ENSGALT00000012429	chr2	16372423	16557109	-1	ENSGALG00000007667	GPR158	Gallus gallus threonine synthase-like 1 (S. cerevisiae) (GPR158), mRNA. [Source:RefSeq mRNA;Acc:NM_001257299]	0.525106	0.769896	1.17711	1.65559	2.14765	1.57946	1.79424	0.824037	up	1.12259	2.17737	0.0205563	0.0592506	yes	GO:0006364(rRNA processing),GO:0005634(nucleus),GO:0005730(nucleolus),GO:0032040(small-subunit processome),GO:0005515(protein binding)	03008(Ribosome biogenesis in eukaryotes)
ENSGALT00000005437	chr18	6699948	6706337	-1	ENSGALG00000003434	C18H17ORF75	chromosome 17 open reading frame 75 [Source:HGNC Symbol;Acc:30173]	2.27511	1.81208	3.15494	4.26297	5.20874	6.23646	5.23606	2.41404	up	1.11703	2.169	0.0192005	0.0588015	yes	GO:0006468(protein phosphorylation),GO:0007219(Notch signaling pathway),GO:0010831(positive regulation of myotube differentiation),GO:0045445(myoblast differentiation),GO:0045944(positive regulation of transcription from RNA polymerase II promoter),GO:0051149(positive regulation of muscle cell differentiation),GO:0060928(atrioventricular node cell development),GO:0002193(MAML1-RBP-Jkappa- ICN1 co…	04330(Notch signaling pathway)
ENSGALT00000037261	chr3	67545634	67588418	-1	ENSGALG00000015345	AIM1	absent in melanoma 1 [Source:HGNC Symbol;Acc:356]	1.69602	1.48994	3.32112	5.16933	4.67782	3.4513	4.43282	2.16903	up	1.03118	2.04369	0.0435692	0.0508307	yes	()	NA
ENSGALT00000011319	chr18	9771940	9818172	-1	ENSGALG00000006988	RNF213	ring finger protein 213 [Source:HGNC Symbol;Acc:14539]	25.6024	24.4005	18.0628	46.4261	45.1815	41.5887	44.3988	22.6886	up	0.968554	1.95688	0.00285598	0.0533117	yes	GO:0000060(protein import into nucleus, translocation),GO:0033120(positive regulation of RNA splicing),GO:0033554(cellular response to stress),GO:0045292(mRNA cis splicing, via spliceosome),GO:0090316(positive regulation of intracellular protein transport),GO:0035690(cellular response to drug),GO:0005634(nucleus),GO:0005737(cytoplasm),GO:0071013(catalytic step 2 spliceosome),GO:0000166(nucleotide…	03040(Spliceosome)
ENSGALT00000010866	chr5	14243984	14284324	-1	ENSGALG00000006717	LOC395381	ovomucin, alpha subunit	0.259685	0.194698	0.235778	0.504515	0.478814	0.363305	0.448878	0.230054	up	0.964352	1.95119	0.0233069	0.0574611	yes	GO:0010923(negative regulation of phosphatase activity),GO:0005622(intracellular),GO:0005783(endoplasmic reticulum),GO:0005795(Golgi stack),GO:0048471(perinuclear region of cytoplasm),GO:0005545(1-phosphatidylinositol binding),GO:0005547(phosphatidylinositol-3,4,5-trisphosphate binding),GO:0008270(zinc ion binding),GO:0043325(phosphatidylinositol-3,4-bisphosphate binding),GO:0046872(metal ion bin…	NA
ENSGALT00000045209	chr6	18217069	18221637	1	ENSGALG00000027353	novel gene	Uncharacterized protein [Source:UniProtKB/TrEMBL;Acc:H9L3I5]	0.743502	1.12313	1.82497	2.53126	2.55898	2.05724	2.38249	1.23053	up	0.953187	1.93615	0.0483361	0.049994	yes	GO:0006810(transport),GO:0006811(ion transport),GO:0007165(signal transduction),GO:0007399(nervous system development),GO:0035095(behavioral response to nicotine),GO:0060084(synaptic transmission involved in micturition),GO:0007626(locomotory behavior),GO:0042391(regulation of membrane potential),GO:0048814(regulation of dendrite morphogenesis),GO:0060079(regulation of excitatory postsynaptic mem…	04080(Neuroactive ligand-receptor interaction),04725(Cholinergic synapse)
ENSGALT00000014137	chr2	19698521	19728825	1	ENSGALG00000008686	TRDMT1	Gallus gallus tRNA aspartic acid methyltransferase 1 (TRDMT1), mRNA. [Source:RefSeq mRNA;Acc:NM_001024831]	3.58587	2.5994	3.95494	5.30788	7.67675	6.5716	6.51874	3.38007	up	0.94754	1.92858	0.0250562	0.0581184	yes	GO:0003676(nucleic acid binding),GO:0008270(zinc ion binding)	NA
ENSGALT00000026615	chr3	103746139	103779362	1	ENSGALG00000016498	MFSD2B	major facilitator superfamily domain containing 2B [Source:HGNC Symbol;Acc:37207]	0.673637	1.38423	1.47632	1.79484	2.44649	2.56551	2.26895	1.17806	up	0.945607	1.926	0.0354399	0.0530245	yes	GO:0005813(centrosome)	NA
ENSGALT00000024494	chrZ	37795390	37821877	1	ENSGALG00000015179	CEP78	centrosomal protein 78kDa [Source:HGNC Symbol;Acc:25740]	1.04207	0.575426	1.02909	1.2957	1.89644	1.80499	1.66571	0.882197	up	0.916965	1.88814	0.0334107	0.0545708	yes	GO:0006355(regulation of transcription, DNA-dependent),GO:0045444(fat cell differentiation),GO:0051101(regulation of DNA binding),GO:0016363(nuclear matrix),GO:0005634(nucleus),GO:0003700(sequence-specific DNA binding transcription factor activity),GO:0046872(metal ion binding),GO:0042802(identical protein binding),GO:0005515(protein binding),GO:0042803(protein homodimerization activity)	05200(Pathways in cancer),05202(Transcriptional misregulation in cancers),05221(Acute myeloid leukemia)
ENSGALT00000030473	chr1	79597189	79606955	1	ENSGALG00000014988	POPDC2	Gallus gallus popeye domain containing 2 (POPDC2), mRNA. [Source:RefSeq mRNA;Acc:NM_206865]	1.11564	1.33832	2.23544	3.07161	3.44088	2.28919	2.93389	1.56313	up	0.908374	1.87693	0.0467099	0.0503029	yes	GO:0006935(chemotaxis),GO:0007165(signal transduction),GO:0007186(G-protein coupled receptor signaling pathway),GO:0007601(visual perception),GO:0007602(phototransduction),GO:0070098(chemokine-mediated signaling pathway),GO:0005887(integral to plasma membrane),GO:0016020(membrane),GO:0016021(integral to membrane),GO:0004871(signal transducer activity),GO:0004930(G-protein coupled receptor activit…	NA
ENSGALT00000014996	chr4	19356587	19395067	1	ENSGALG00000009212	MND1	Gallus gallus meiotic nuclear divisions 1 homolog (S. cerevisiae) (MND1), mRNA. [Source:RefSeq mRNA;Acc:NM_001257313]	4.27408	4.18886	6.73789	8.15013	10.6199	9.37965	9.38323	5.06694	up	0.888968	1.85185	0.0179451	0.0601236	yes	GO:0000122(negative regulation of transcription from RNA polymerase II promoter),GO:0006355(regulation of transcription, DNA-dependent),GO:0070932(histone H3 deacetylation),GO:0005634(nucleus),GO:0005737(cytoplasm),GO:0003677(DNA binding),GO:0003682(chromatin binding),GO:0003700(sequence-specific DNA binding transcription factor activity),GO:0043565(sequence-specific DNA binding),GO:0005515(prote…	04010(MAPK signaling pathway),05202(Transcriptional misregulation in cancers),05166(HTLV-I infection)
ENSGALT00000026721	chr1	121469874	121479163	1	ENSGALG00000016559	PIGA	Gallus gallus phosphatidylinositol glycan anchor biosynthesis, class A (PIGA), mRNA. [Source:RefSeq mRNA;Acc:NM_001030808]	1.97944	2.47346	2.25579	4.43896	3.61655	4.29237	4.11596	2.23623	up	0.88016	1.84058	0.00642121	0.0585376	yes	GO:0000122(negative regulation of transcription from RNA polymerase II promoter),GO:0006355(regulation of transcription, DNA-dependent),GO:0016573(histone acetylation),GO:0018076(N-terminal peptidyl-lysine acetylation),GO:0045944(positive regulation of transcription from RNA polymerase II promoter),GO:0045893(positive regulation of transcription, DNA-dependent),GO:0030718(germ-line stem cell main…	04310(Wnt signaling pathway),04330(Notch signaling pathway),04350(TGF-beta signaling pathway),04630(Jak-STAT signaling pathway),04066(HIF-1 signaling pathway),04110(Cell cycle),04520(Adherens junction),04916(Melanogenesis),04720(Long-term potentiation),05200(Pathways in cancer),05206(MicroRNAs in cancer),05203(Viral carcinogenesis),05211(Renal cell carcinoma),05215(Prostate cancer),05016(Huntingt…
ENSGALT00000044226	chrZ	50079798	50109297	1	ENSGALG00000026768	SLCO4C1	solute carrier organic anion transporter family, member 4C1	0.397573	0.554005	0.615573	0.995093	0.848161	0.994441	0.945898	0.522384	up	0.856575	1.81073	0.00788061	0.0551643	yes	GO:0005515(protein binding)	NA
ENSGALT00000030139	chr1	168526926	168541731	1	ENSGALG00000019094	PHF11	PHD finger protein 11 [Source:HGNC Symbol;Acc:17024]	3.98588	4.82338	7.17215	11.8776	8.29867	8.70689	9.62772	5.32714	up	0.853834	1.8073	0.0453386	0.0507792	yes	()	NA
ENSGALT00000023911	chrZ	22034805	22073103	-1	ENSGALG00000014810	PAPD4	PAP associated domain containing 4 [Source:HGNC Symbol;Acc:26776]	11.9328	9.33552	11.4909	17.5754	20.7223	19.8395	19.379	10.9197	up	0.827561	1.77468	0.00257904	0.0532097	yes	()	NA
ENSGALT00000038834	chr1	28777011	28942648	1	ENSGALG00000009523	CNTN1	Gallus gallus contactin 1 (CNTN1), mRNA. [Source:RefSeq mRNA;Acc:NM_001004381]	1.94916	1.09915	1.39887	3.19589	2.41268	2.27242	2.627	1.48239	up	0.825491	1.77214	0.0405431	0.0506143	yes	GO:0008284(positive regulation of cell proliferation),GO:0008543(fibroblast growth factor receptor signaling pathway),GO:0008584(male gonad development),GO:0002062(chondrocyte differentiation),GO:0000122(negative regulation of transcription from RNA polymerase II promoter),GO:0042472(inner ear morphogenesis),GO:0048505(regulation of timing of cell differentiation),GO:0006606(protein import into n…	04014(Ras signaling pathway),04010(MAPK signaling pathway),04151(PI3K-Akt signaling pathway),04810(Regulation of actin cytoskeleton),05200(Pathways in cancer),05205(Proteoglycans in cancer),05218(Melanoma)
ENSGALT00000013570	chr15	12584397	12587862	1	ENSGALG00000008337	SLC8B1	solute carrier family 8 (sodium/lithium/calcium exchanger), member B1 [Source:HGNC Symbol;Acc:26175]	11.5456	18.9526	13.2412	24.1239	29.2531	24.0304	25.8025	14.5798	up	0.823538	1.76974	0.0187185	0.0601447	yes	GO:0006904(vesicle docking involved in exocytosis),GO:0015031(protein transport),GO:0000145(exocyst),GO:0005737(cytoplasm),GO:0032584(growth cone membrane),GO:0035748(myelin sheath abaxonal region),GO:0047485(protein N-terminus binding),GO:0005515(protein binding),GO:0030165(PDZ domain binding)	04530(Tight junction)
ENSGALT00000012287	chr12	14620837	14643753	1	ENSGALG00000007596	LOC416086	monocarboxylate transporter 2-like	0.921718	0.854638	0.722686	1.47705	1.42407	1.49508	1.4654	0.833014	up	0.814883	1.75916	0.00412581	0.0557696	yes	GO:0006810(transport),GO:0006886(intracellular protein transport),GO:0015031(protein transport),GO:0016192(vesicle-mediated transport),GO:0000139(Golgi membrane),GO:0005634(nucleus),GO:0005737(cytoplasm),GO:0005794(Golgi apparatus),GO:0016020(membrane),GO:0030117(membrane coat),GO:0030126(COPI vesicle coat),GO:0030663(COPI-coated vesicle membrane),GO:0031410(cytoplasmic vesicle),GO:0005198(struct…	NA
ENSGALT00000045576	chrZ	15962742	16010010	1	ENSGALG00000028026	NDUFS4	NADH dehydrogenase (ubiquinone) Fe-S protein 4, 18kDa (NADH-coenzyme Q reductase) [Source:HGNC Symbol;Acc:7711]	7.1127	4.40161	7.44404	11.0172	8.7998	13.1098	10.9756	6.31945	up	0.796428	1.7368	0.0449002	0.051017	yes	()	NA
ENSGALT00000001635	chr26	2547059	2552305	-1	ENSGALG00000001091	novel gene	Uncharacterized protein [Source:UniProtKB/TrEMBL;Acc:Q5ZKG6]	7.77549	4.42969	4.30331	11.0268	8.66082	8.94809	9.54523	5.50283	up	0.794606	1.7346	0.0493811	0.0500191	yes	GO:0007165(signal transduction),GO:0007166(cell surface receptor signaling pathway),GO:0007186(G-protein coupled receptor signaling pathway),GO:0007189(adenylate cyclase-activating G-protein coupled receptor signaling pathway),GO:0007595(lactation),GO:0008284(positive regulation of cell proliferation),GO:0008340(determination of adult lifespan),GO:0019933(cAMP-mediated signaling),GO:0021984(adeno…	04080(Neuroactive ligand-receptor interaction)
ENSGALT00000020836	chr2	63302984	63336417	1	ENSGALG00000012770	MAK	male germ cell-associated kinase [Source:HGNC Symbol;Acc:6816]	1.82277	2.30387	3.13281	3.97738	4.34067	4.22084	4.17963	2.41982	up	0.788478	1.72725	0.0361403	0.0532594	yes	()	NA
ENSGALT00000032282	chr4	21378552	21379338	-1	ENSGALG00000009432	novel gene	Uncharacterized protein [Source:UniProtKB/TrEMBL;Acc:F1NSN7]	2.57207	3.214	3.46264	5.99639	4.74243	5.0977	5.27884	3.0829	up	0.775932	1.7123	0.0111518	0.0539692	yes	GO:0006184(GTP catabolic process),GO:0007165(signal transduction),GO:0007264(small GTPase mediated signal transduction),GO:0015031(protein transport),GO:0016020(membrane),GO:0005622(intracellular),GO:0000166(nucleotide binding),GO:0003924(GTPase activity),GO:0005525(GTP binding)	NA
ENSGALT00000026359	chr3	88949756	89752149	1	ENSGALG00000016341	CSMD1	CUB and Sushi multiple domains 1 [Source:HGNC Symbol;Acc:14026]	0.316112	0.533698	0.44338	0.645724	0.833658	0.727251	0.735544	0.431063	up	0.770913	1.70635	0.0225165	0.0584535	yes	GO:0050925(negative regulation of negative chemotaxis),GO:0021836(chemorepulsion involved in postnatal olfactory bulb interneuron migration),GO:0070100(negative regulation of chemokine-mediated signaling pathway),GO:0035385(Roundabout signaling pathway),GO:0033600(negative regulation of mammary gland epithelial cell proliferation),GO:0006919(activation of cysteine-type endopeptidase activity invo…	04360(Axon guidance)
ENSGALT00000044826	chr1	40612560	40619512	-1	ENSGALG00000028648	CCDC59	coiled-coil domain containing 59 [Source:HGNC Symbol;Acc:25005]	1.0205	0.861462	1.20983	1.96373	1.91583	1.36424	1.74793	1.0306	up	0.762169	1.69604	0.0451618	0.0508719	yes	GO:0005887(integral to plasma membrane),GO:0016323(basolateral plasma membrane),GO:0043234(protein complex),GO:0005515(protein binding),GO:0005254(chloride channel activity)	NA
ENSGALT00000039564	chr17	5881860	5902534	1	ENSGALG00000023689	ASS1	Gallus gallus argininosuccinate synthase 1 (ASS1), mRNA. [Source:RefSeq mRNA;Acc:NM_001013395]	110.445	124.204	115.299	213.124	176.732	198.576	196.144	116.649	up	0.749735	1.68148	0.00966656	0.0541327	yes	GO:0016021(integral to membrane),GO:0004872(receptor activity),GO:0042802(identical protein binding),GO:0046982(protein heterodimerization activity),GO:0005515(protein binding)	04920(Adipocytokine signaling pathway),04932(Non-alcoholic fatty liver disease (NAFLD))
ENSGALT00000007763	chr20	7062873	7075426	-1	ENSGALG00000004859	ZNFX1	zinc finger, NFX1-type containing 1 [Source:HGNC Symbol;Acc:29271]	27.5968	22.2178	21.161	35.1421	40.1995	41.9552	39.0989	23.6585	up	0.724768	1.65264	0.00565935	0.0554617	yes	GO:0035556(intracellular signal transduction),GO:0006469(negative regulation of protein kinase activity),GO:0004860(protein kinase inhibitor activity),GO:0005515(protein binding)	NA
ENSGALT00000026211	chr1	112266516	112364076	1	ENSGALG00000016255	RPGR	retinitis pigmentosa GTPase regulator [Source:HGNC Symbol;Acc:10295]	1.70121	1.78162	1.68155	2.57662	3.2793	2.66336	2.83976	1.72146	up	0.722141	1.64963	0.034838	0.0533457	yes	GO:0006306(DNA methylation),GO:0003677(DNA binding),GO:0008168(methyltransferase activity)	NA
ENSGALT00000019150	chr7	26880824	26889311	-1	ENSGALG00000011720	CCDC14	coiled-coil domain containing 14 [Source:HGNC Symbol;Acc:25766]	3.07633	1.76412	3.18957	4.82899	4.02931	4.20377	4.35402	2.67667	up	0.701907	1.62665	0.0469167	0.0502496	yes	GO:0008152(metabolic process),GO:0042853(L-alanine catabolic process),GO:0019448(L-cysteine catabolic process),GO:0019265(glycine biosynthetic process, by transamination of glyoxylate),GO:0009436(glyoxylate catabolic process),GO:0046487(glyoxylate metabolic process),GO:0006625(protein targeting to peroxisome),GO:0046724(oxalic acid secretion),GO:0005782(peroxisomal matrix),GO:0005777(peroxisome),…	01200(Carbon metabolism),00630(Glyoxylate and dicarboxylate metabolism),00680(Methane metabolism),00250(Alanine),00260(Glycine),04146(Peroxisome)
ENSGALT00000017187	chr5	39942124	40036058	-1	ENSGALG00000010562	CEP128	centrosomal protein 128kDa [Source:HGNC Symbol;Acc:20359]	4.05806	2.78285	4.84632	6.1113	5.71773	6.88409	6.23771	3.89574	up	0.679116	1.60116	0.0394206	0.0506652	yes	GO:0006810(transport),GO:0055085(transmembrane transport),GO:0016020(membrane),GO:0016021(integral to membrane),GO:0005215(transporter activity),GO:0005515(protein binding)	NA
ENSGALT00000044925	chr1	27363925	27678175	1	ENSGALG00000027876	IMMP2L	mitochondrial inner membrane protease subunit 2 [Source:RefSeq peptide;Acc:NP_001264285]	0.849591	0.754937	0.841038	1.36538	1.22064	1.3018	1.29594	0.815189	up	0.668792	1.58974	0.00114917	0.0750791	yes	GO:0000079(regulation of cyclin-dependent protein serine/threonine kinase activity),GO:0007049(cell cycle),GO:0051301(cell division),GO:0051726(regulation of cell cycle),GO:0070141(response to UV-A),GO:0045737(positive regulation of cyclin-dependent protein kinase activity),GO:0031571(mitotic G1 DNA damage checkpoint),GO:0001934(positive regulation of protein phosphorylation),GO:0042493(response …	04310(Wnt signaling pathway),04390(Hippo signaling pathway),04630(Jak-STAT signaling pathway),04151(PI3K-Akt signaling pathway),04110(Cell cycle),04115(p53 signaling pathway),04510(Focal adhesion),04917(Prolactin signaling pathway),05200(Pathways in cancer),05206(MicroRNAs in cancer),05205(Proteoglycans in cancer),05203(Viral carcinogenesis),05210(Colorectal cancer),05212(Pancreatic cancer),05214…
ENSGALT00000044936	chr18	668598	677390	-1	ENSGALG00000028751	TMEM220	transmembrane protein 220 [Source:HGNC Symbol;Acc:33757]	3.58294	4.31233	5.74604	6.41175	6.52562	7.88051	6.93929	4.5471	up	0.609842	1.52609	0.0433298	0.0510068	yes	GO:0001659(temperature homeostasis),GO:0001660(fever generation),GO:0002024(diet induced thermogenesis),GO:0002790(peptide secretion),GO:0006629(lipid metabolic process),GO:0006810(transport),GO:0006811(ion transport),GO:0006816(calcium ion transport),GO:0014832(urinary bladder smooth muscle contraction),GO:0019233(sensory perception of pain),GO:0042221(response to chemical),GO:0042637(catagen),G…	04080(Neuroactive ligand-receptor interaction)
ENSGALT00000045414	chr27	740845	747286	1	ENSGALG00000026481	FK27	Gallus gallus feather keratin 27 (FK27), mRNA. [Source:RefSeq mRNA;Acc:NM_001277773]	2.9315	2.10395	2.14623	3.40466	3.93103	3.57543	3.63704	2.3939	up	0.603404	1.5193	0.024822	0.0582647	yes	GO:0005488(binding),GO:0005515(protein binding)	NA
ENSGALT00000045939	chr1	36352625	36370277	1	ENSGALG00000027799	TMEM19	transmembrane protein 19 [Source:HGNC Symbol;Acc:25605]	2.98151	3.27404	2.27423	4.52865	4.74773	3.6814	4.31926	2.84326	up	0.603237	1.51912	0.0288537	0.0562719	yes	GO:0001779(natural killer cell differentiation),GO:0006954(inflammatory response),GO:0051881(regulation of mitochondrial membrane potential),GO:0048469(cell maturation),GO:2000377(regulation of reactive oxygen species metabolic process),GO:0032618(interleukin-15 production),GO:0071609(chemokine (C-C motif) ligand 5 production),GO:0005739(mitochondrion)	NA
[truncated: 91 more rows]

## Sheet: Table S4 
transcript_id	chr	start	end	strand	gene_id	gene_name	annotation	S1p_S_fpkm	S2p_S_fpkm	S3p_S_fpkm	R1p_R_fpkm	R2p_R_fpkm	R3p_R_fpkm	mean_fpkm_S	mean_fpkm_R	regulation	log2fold_change	Fold change	pvalue	FDR	significant	go	kegg
[truncated: 265 more rows]

## Sheet: Table S5
qPCR primers used in this study.
[truncated: 35 more rows]
